# Supplementary material for: Epigenome-wide association study of leukocyte telomere length
Source: Aging (Albany NY). 2019 Aug 26;11(16):5876–94. doi: 10.18632/aging.102230 (PMC6738430; doi:10.18632/aging.102230)
Supplement: Supplementary File 1 [file aging-11-102230-s003.csv]

Name	UCSC_RefGene_Name	UCSC_RefGene_Accession	UCSC_RefGene_Group	UCSC_CpG_Islands_Name	Relation_to_UCSC_CpG_Island	SNP_ID	SNP_DISTANCE	SNP_MinorAlleleFrequency	Random_Loci	a_FHS_European_female_cor	a_FHS_European_female_Z	a_FHS_European_female_p	a_FHS_European_female_n	a_FHS_European_male_cor	a_FHS_European_male_Z	a_FHS_European_male_p	a_FHS_European_male_n	aa_FHS_European_female_cor	aa_FHS_European_female_Z	aa_FHS_European_female_p	aa_FHS_European_female_n	aa_FHS_European_male_cor	aa_FHS_European_male_Z	aa_FHS_European_male_p	aa_FHS_European_male_n	aaa_FHS_European_female_cor	aaa_FHS_European_female_Z	aaa_FHS_European_female_p	aaa_FHS_European_female_n	aaa_FHS_European_male_cor	aaa_FHS_European_male_Z	aaa_FHS_European_male_p	aaa_FHS_European_male_n	a_JHS_African_female_cor	a_JHS_African_female_Z	a_JHS_African_female_p	a_JHS_African_female_n	a_JHS_African_male_cor	a_JHS_African_male_Z	a_JHS_African_male_p	a_JHS_African_male_n	aa_JHS_African_female_cor	aa_JHS_African_female_Z	aa_JHS_African_female_p	aa_JHS_African_female_n	aa_JHS_African_male_cor	aa_JHS_African_male_Z	aa_JHS_African_male_p	aa_JHS_African_male_n
cg00007076	`RRS1;RRS1	NM_015169;NM_015169	1stExon;3'UTR	chr8:67344497-67344989	N_Shore	rs569230573;rs530401846;rs550194560;rs570202184;rs539564549	4;21;23;26;44	0.000200;0.000200;0.000200;0.000200;0.000200		0.169648634217162	3.59332112700733	0.000340243113499162	442	0.133510385190868	2.78515817909452	0.00544637510820624	432	0.0796753727703562	1.67483478092642	0.09432809402134	442	0.0517680338001103	1.07444529625085	0.283010587604559	432	0.0837518715046899	1.76091905688568	0.0785966224615714	442	0.0480712913487763	0.997596419514593	0.31884969902136	432	0.147158655155005	4.76201165308574	2.01229742385481e-06	1034	0.20549732107062	5.11059599325343	3.57767821148084e-07	603	0.0910871233319089	2.93428483933577	0.003372871932897	1034	0.120293990394376	2.96339307384087	0.00309072978614889	603
cg00008629	`ROD1;ROD1;ROD1	NM_001163790;NM_005156;NM_001163788	Body;Body;5'UTR	chr9:115095149-115095919	N_Shore	rs562044821	42	0.000998		0.0682355870476226	1.43354943265823	0.152092770117546	442	0.15753151887867	3.29407458982766	0.00101881081967619	432	0.0357835412727749	0.750922512832369	0.453004262323508	442	0.15009639673907	3.13615975256466	0.00175762856524553	432	0.0376368626387842	0.789850581959827	0.429931578883357	442	0.14548412379108	3.03838177344472	0.00243573994785004	432	0.0624391875079177	2.00845652422573	0.0447159514264896	1034	0.108806304163116	2.67802110315314	0.00748957925884077	603	0.0483466650300813	1.55433664786521	0.120266199398472	1034	0.0907491654994493	2.23088071965884	0.0258526812675517	603
cg00013899	`CACHD1	NM_020925	Body			rs139940510	32	0.0002		-0.00753613618326473	-0.158082318920538	0.874463277808343	442	-0.0923251362440249	-1.9199624377627	0.0551770893539039	432	0.00824324914122706	0.172915769419601	0.862795610664656	442	-0.0794715531871184	-1.65143975809071	0.0990228700384019	432	0.00760684491158693	0.159565602752208	0.873295285373976	442	-0.0789960413747878	-1.64151704032092	0.101065906913551	432	-0.0823116883711885	-2.6502391362383	0.00809462714136091	1034	-0.107177465090735	-2.63761842710462	0.00843890111434144	603	-0.0758463445304308	-2.44123377820336	0.0147088341028171	1034	-0.118714020305384	-2.92409844764403	0.00350672646507249	603
cg00020474	`									-0.0867009244758045	-1.82323156972638	0.0685990560680383	442	-0.0870241513040561	-1.80914748344911	0.070769810136812	432	-0.0714389522480368	-1.50107317664496	0.133722862535019	442	-0.0931318902519953	-1.93683674088004	0.0530753554651957	432	-0.0711400405151228	-1.49477112294227	0.135361040966474	442	-0.0953248342307703	-1.98271799304826	0.0476967988820102	432	-0.0651683198041523	-2.09648765868902	0.0361499431240284	1034	-0.191779206962213	-4.76047095950241	2.09880263296261e-06	603	-0.0288461262051075	-0.926931945991729	0.354111839013336	1034	-0.142113691012484	-3.50770270896975	0.000464748810331605	603
cg00025591	`S100B	NM_006272	TSS1500			rs77386374;rs547044169	1;27	0.006789;0.000200		-0.104045039758641	-2.19039405551547	0.0287303621744845	442	-0.152744980157687	-3.1923708028407	0.00145129143264148	432	-0.110838423595849	-2.33455804697242	0.0197622411276587	442	-0.198634197529154	-4.17445812854077	3.20937272808615e-05	432	-0.108909778715106	-2.29360807626785	0.0220196482997997	442	-0.201602516760313	-4.23857840888106	2.42669529144415e-05	432	-0.0531554973622559	-1.7092184433622	0.0875618357290971	1034	-0.128191164303463	-3.16003110556518	0.00160849764557792	603	-0.0409752716620822	-1.31705806921004	0.187987921547966	1034	-0.09876889248412	-2.42926922993325	0.015254615106406	603
cg00045114	`					rs566678880;rs534235501	0;9	0.000399;0.000200		-0.0119380910159164	-0.250427407013068	0.802369129941489	442	-0.0449209173150702	-0.932127281581443	0.351631797121997	432	-0.0244021152800587	-0.511964723259573	0.608897011124633	442	-0.0557350498312085	-1.15694556307662	0.247691972293805	432	-0.0255609237042516	-0.536287275689613	0.591990702179701	442	-0.0517527822347072	-1.07412818346984	0.283152625896272	432	-0.0289602255361928	-0.930600423881702	0.352210611165947	1034	-0.042095367919303	-1.03259084209452	0.302067935179288	603	-0.0452479242130127	-1.45457178844992	0.145954294233211	1034	-0.0660184806629112	-1.62082044024899	0.105327466456943	603
cg00083262	`									-0.105583793646875	-2.22302977413023	0.0264395474206543	442	-0.107978336557684	-2.24784990724882	0.0248098529763104	432	-0.0968437950072381	-2.03779924351338	0.0418464205370817	442	-0.111411497760097	-2.31990860793776	0.0205500743263381	432	-0.096702036523385	-2.03479758191223	0.0421484593427781	442	-0.114376655844069	-2.38218925399167	0.0173975952056575	432	-0.026050257574969	-0.837047568271116	0.402706407219745	1034	-0.103014413334082	-2.53441995986055	0.0113700251443039	603	-0.0141157346372356	-0.45349466419716	0.650277084922759	1034	-0.0765355161956831	-1.87996774774283	0.0603447048305251	603
cg00087273	`					rs533697260	12	0.0002		-0.0517255939660163	-1.08597442616771	0.277870534348794	442	-0.0372013274948221	-0.77177930911988	0.440563638667838	432	-0.0715387746222615	-1.50317782456828	0.133179206586732	442	-0.0754531305847784	-1.56760883767093	0.117359627549754	432	-0.069291298188643	-1.45579942559255	0.145838362827183	442	-0.077748547958871	-1.61548859042785	0.106585002458259	432	0.0187231444890242	0.601546761941199	0.547584593307841	1034	-0.0409257735763219	-1.00386838857989	0.315710931920622	603	0.00468395712101274	0.150472083845165	0.88042114408607	1034	-0.0467169386415611	-1.14611410194109	0.252031501821367	603
cg00089823	`			chr5:1930754-1931986	S_Shore					-0.0889712781888178	-1.87122521185788	0.061633246540231	442	-0.0743160278905241	-1.5438963994816	0.123003727111846	432	-0.0829915496706275	-1.74485877828887	0.0813573291201752	442	-0.0527377592259956	-1.09460900656379	0.274078205970475	432	-0.0827417774862981	-1.73958328653207	0.0822811744487185	442	-0.055491461100316	-1.15187872874033	0.249767787695345	432	-0.0279235135327029	-0.897269337046808	0.369722274460478	1034	-0.0156308368192116	-0.383225887226772	0.701676232224141	603	-0.0155218322549983	-0.498675137133746	0.618100424695996	1034	0.0127789102950611	0.313295891274369	0.754158091843084	603
cg00093643	`CASC4;CASC4	NM_138423;NM_177974	TSS1500;TSS1500	chr15:44580804-44581543	N_Shore	rs149139105;rs78623902	0;44	0.000399;0.500000		-0.0278935082453038	-0.58525098100179	0.558627983282218	442	-0.133948472986773	-2.79440798052133	0.00529401507075899	432	-0.00233039898400259	-0.0488829499744154	0.961034722192059	442	-0.102020897680465	-2.12293627670395	0.0340183037971977	432	-0.000433005466571221	-0.00908279986057609	0.992757190263019	442	-0.107833502215915	-2.24481117637674	0.0250051931875796	432	-0.106079960280404	-3.42066251474009	0.000634056324944388	1034	-0.153232130135855	-3.78635435804658	0.000158538191467404	603	-0.0825211557104623	-2.6570142432857	0.0079341554069826	1034	-0.114714457632864	-2.82469371109913	0.00479629545320047	603
cg00095214	`C1orf122;YRDC;C1orf122	NM_198446;NM_024640;NM_001142726	TSS1500;Body;TSS1500	chr1:38273374-38274402	N_Shore	rs550659746	6	0.0002		-0.0697954700778853	-1.46642641973417	0.142921584321882	442	-0.10483692166909	-2.18196206437359	0.0293548565033894	432	-0.088248800501201	-1.85595045796288	0.0637836716730343	442	-0.106320243935951	-2.21306762413798	0.027126782993158	432	-0.0842026535351822	-1.77044189748699	0.0769960438203897	442	-0.110738912584836	-2.30578736060671	0.0213306199695207	432	-0.0540785987432154	-1.73895834878976	0.0821909047059371	1034	-0.118625816099924	-2.92190520856803	0.00353138301912575	603	-0.0603897840042391	-1.94237065292494	0.0522207841561084	1034	-0.122023223866498	-3.00641733555971	0.00268728060295301	603
cg00096536	`			chr4:154712073-154712706	N_Shore	rs545655666	21	0.000599		-0.0542755887435848	-1.13961427496889	0.254833666335442	442	-0.0746558533261505	-1.55098248446787	0.121295274022379	432	-0.0366293690813013	-0.768688036645873	0.442388863097872	442	-0.0736917797773386	-1.53088043170065	0.126190832927599	432	-0.0355022398673749	-0.745014378947747	0.456566185841888	442	-0.0764570054252703	-1.58854642376894	0.112547035358775	432	-0.083244549632875	-2.68041384329483	0.00740161929243334	1034	-0.161517477507291	-3.99463183063138	6.77101637255698e-05	603	-0.0350647677536191	-1.12690914734215	0.259945176467274	1034	-0.102387328725933	-2.51888291469168	0.011882104829773	603
cg00099441	`					rs555394013;rs573591616;rs534897556	38;44;46	0.000200;0.000200;0.000200		0.1027554509516	2.16305106795634	0.030779451403298	442	0.149287659117166	3.1190050129632	0.00186235053338648	432	0.0585676830505042	1.22993366796747	0.219115551034747	442	0.094994574237366	1.97580699435308	0.0484763586860125	432	0.0631311371400646	1.32601340744818	0.185231017950233	442	0.0922666750276401	1.91873974462402	0.0553320402689925	432	0.0857379474896742	2.7610896119144	0.00580273907474194	1034	0.124762596044029	3.07461223791053	0.00214545935186588	603	0.0545274905457567	1.75342153837766	0.0796772153880652	1034	0.0894902594815353	2.19976555123406	0.0279934158113301	603
cg00099766	`RRAGD	NM_021244	Body	chr6:90120874-90122370	N_Shore					-0.0597518454142456	-1.25486010971408	0.209924231632978	442	-0.0899250718226726	-1.86977688775131	0.0618419719318626	432	-0.038072911024257	-0.799010336062617	0.424603588943995	442	-0.0934858273438422	-1.94424059871547	0.0521745524625278	432	-0.0358544013904748	-0.752410796667749	0.452109481827814	442	-0.0978947123948415	-2.03651021855902	0.0419823431191947	432	-0.0652691434601746	-2.09974042972824	0.0358622909060888	1034	-0.150212392776294	-3.71058023019396	0.000213910548614369	603	-0.038380592581662	-1.2335731541236	0.217529912592814	1034	-0.113357708570182	-2.79099435947674	0.00532263373353949	603
cg00101715	`FAM55C;FAM55C	NM_001134456;NM_145037	TSS1500;TSS1500	chr3:101497830-101498648	N_Shore					-0.0360660952149232	-0.756857073464097	0.44944227339655	442	-0.0763362668928865	-1.58602803784646	0.113117521579854	432	-0.0473948884053194	-0.9949089596272	0.320146136112287	442	-0.0993143636097667	-2.06623777462292	0.039080998039574	432	-0.0458960242066849	-0.963399955755766	0.335706305344164	442	-0.103311884746474	-2.14999193534047	0.0318073625301661	432	-0.0291248199037645	-0.935892441572208	0.34947937961515	1034	-0.0942870371222636	-2.318361604306	0.0205760447940748	603	-0.0253036146707349	-0.813046021090664	0.41632945897923	1034	-0.0886406808112319	-2.17877133285899	0.0295227606066685	603
cg00101940	`					rs539070534	1	0.000399		-0.0529430448979764	-1.11158203174257	0.266701394482176	442	-0.127725028396884	-2.66310780350229	0.00786251608655679	432	-0.0531240637576859	-1.1153898250271	0.265067353774033	442	-0.116762509554807	-2.43233313273013	0.0151763824531641	432	-0.0496045115593983	-1.04136770624523	0.298078565874413	442	-0.120894596025983	-2.51924525091415	0.0119134970811283	432	-0.0427338265881774	-1.37365037181332	0.169718607734904	1034	-0.0993028780995572	-2.44248971647678	0.0147092444054663	603	-0.0410829289862458	-1.3205223663238	0.186829432219991	1034	-0.118691776174908	-2.92354533248049	0.00351292979813806	603
cg00117965	`FAM195A	NM_138418	TSS1500	chr16:691597-692700	N_Shore	rs576605067;rs543912314	12;31	0.001198;0.000599		-0.0457309543531018	-0.959930138572421	0.337449125175433	442	-0.160693992852184	-3.36135647447725	0.000802027240197334	432	-0.0375227272110933	-0.787453071165162	0.431332540392818	442	-0.162978462232742	-3.41000234552671	0.000672895143493143	432	-0.0342819854466533	-0.719386902667707	0.472197690237945	442	-0.168159661215771	-3.52047052621821	0.000448051502051319	432	-0.0694707762913565	-2.23533247893394	0.0254902759862773	1034	-0.0933488272021456	-2.29515686000717	0.0218750432811645	603	-0.051129858981613	-1.64396787335539	0.100339225567923	1034	-0.0753189307113545	-1.84996984800777	0.0645554227169049	603
cg00138407	`KLHL18	NM_025010	3'UTR			rs547395055	14	0.000599		-0.0514269353266585	-1.07969300035935	0.280658280722362	442	-0.129311705286208	-2.69656241204074	0.00711925305415462	432	-0.0374376535218288	-0.785666040044955	0.432378495623447	442	-0.118618876479078	-2.47136826795644	0.0136243014174525	432	-0.0357853852825073	-0.75096124270151	0.452980964616702	442	-0.124340201247117	-2.59178556317209	0.00968378337903439	432	-0.0562517225847319	-1.80898254889901	0.0705960834384645	1034	-0.111895986367328	-2.75469939782232	0.0059474266080911	603	-0.0534578781902659	-1.71896003573837	0.0857721783030691	1034	-0.0987349665168066	-2.42842933400336	0.0152898567818803	603
cg00153395	`JAK1	NM_002227	Body			rs559856906	28	0.0002		-0.0609140999161796	-1.27932883643698	0.201176670490423	442	-0.157045023094573	-3.28373048939841	0.00105659635676955	432	-0.0516780904724897	-1.08497531377308	0.278312681457439	442	-0.172408086106683	-3.61119870095348	0.000318161414409521	432	-0.0528909093067048	-1.11048535543363	0.267173295974533	442	-0.175922917247786	-3.68636391090804	0.00023822923015801	432	-0.0697842280061709	-2.2454510940634	0.0248327596128012	1034	-0.14298111082568	-3.52940883179526	0.00042850090608672	603	-0.0575665079049615	-1.85135694949246	0.0642563876163323	1034	-0.108530247133292	-2.67117260938016	0.00764342146353601	603
cg00163365	`COQ2	NM_015697	Body	chr4:84205381-84206020	N_Shore	rs568363824;rs535445357	36;2	0.000200;0.000200		-0.0464461619845276	-0.974964396157444	0.329939691782967	442	-0.0909034903554345	-1.89023303166403	0.0590488474512727	432	-0.0530267109414021	-1.11334196631187	0.265945292387289	442	-0.0979288979506735	-2.0372259670139	0.0419104005933635	432	-0.0510216071762009	-1.07116839730186	0.284471885835581	442	-0.102936765687555	-2.14212968882374	0.0324367673613787	432	-0.0315703803030531	-1.01452793546394	0.310488312581798	1034	-0.0716684080714774	-1.75999007382796	0.0786618421478735	603	-0.0364258313984801	-1.17068893131475	0.241889952210571	1034	-0.072377753067748	-1.77747055785351	0.0757404611500056	603
cg00170213	`RBM16	NM_014892	TSS1500	chr6:155054186-155055403	N_Shore	rs3828933;rs528821641	24;40	0.178315;0.000399		-0.0988420924442297	-2.08012105573996	0.0377793618092173	442	-0.122036468728438	-2.54327820928637	0.0111288615881947	432	-0.0708160238354656	-1.4879400776762	0.137154211703671	442	-0.109319131568229	-2.27598535499515	0.0230631787650136	432	-0.0680259222893721	-1.42913095789472	0.153358770291383	442	-0.114865400689651	-2.39245900684294	0.0169207363397161	432	-0.0587714107480076	-1.89019558053855	0.0588659591832182	1034	-0.104649405263435	-2.57493912893515	0.0101256438154511	603	-0.0297326228305369	-0.955434888114742	0.339510399853599	1034	-0.0728986432346038	-1.79030807223532	0.0736519510353219	603
cg00174573	`					rs185661856;rs568276437;rs148313810;rs548045606	25;17;2;1	0.000200;0.000200;0.002796;0.000200		-0.0949754837046213	-1.99824536039434	0.0459770501517009	442	-0.111431917865767	-2.32033737127116	0.0205267698854244	432	-0.0681425664721674	-1.43158910155489	0.152653465988497	442	-0.110154996426752	-2.29352948906304	0.022029001389804	432	-0.0678709366799886	-1.42586487283986	0.154299728350019	442	-0.11136016841381	-2.31883084840748	0.0206087554909139	432	-0.0681921236237842	-2.19406053027711	0.0283306214647778	1034	-0.0966760145787611	-2.37746698299495	0.0175670066974311	603	-0.0347521267564007	-1.1168533772976	0.264220813842378	1034	-0.0363235257596477	-0.890874123833305	0.373248086023728	603
cg00174992	`NOSTRIN;NOSTRIN;NOSTRIN;NOSTRIN;NOSTRIN;NOSTRIN;NOSTRIN	NM_001171631;NM_052946;NM_001039724;NM_001039724;NM_001171632;NM_052946;NM_001171632	5'UTR;5'UTR;1stExon;5'UTR;5'UTR;1stExon;1stExon			rs577556073	1	0.0002		-0.128259904363727	-2.70530271536653	0.00693323034722436	442	-0.113977243988057	-2.37379747496035	0.0177959718572695	432	-0.127256746141835	-2.68391113158093	0.00738991792335436	442	-0.10503703806278	-2.18615797060307	0.0290453954532973	432	-0.127620110588718	-2.69165895759099	0.00722147946964158	442	-0.112124249678932	-2.33487551442572	0.0197501194422435	432	-0.016927002081123	-0.543827769114489	0.586659589072546	1034	-0.0740951414446301	-1.81979989875428	0.0690321697824107	603	-0.0158470533010046	-0.509125355009714	0.610758262989049	1034	-0.0852121674707495	-2.09408026676193	0.0364439522571077	603
cg00186499	`RBM38;RBM38	NM_017495;NM_183425	Body;Body			rs536916573;rs6025529;rs573491844	1;44;51	0.000799;0.132987;0.000599		-0.0433016273868874	-0.908870936888866	0.363765849987982	442	-0.0963049305088992	-2.00323001418255	0.0454449143626878	432	-0.0447949828557742	-0.940256727732291	0.347440501996486	442	-0.109685539440208	-2.28367556187043	0.0226047771257362	432	-0.0424332723138821	-0.890622632638287	0.373474933728703	442	-0.11425137175814	-2.37955690921226	0.0175217074044037	432	-0.0261845434466799	-0.84136441384984	0.400284881482577	1034	-0.0965082385787776	-2.37331516718382	0.0177650051439377	603	-0.0098653281454496	-0.316931549530602	0.751355743179324	1034	-0.0775858651968656	-1.90587119620632	0.0568944569031147	603
cg00192220	`					rs531493638	15	0.000399		-0.00970103755445968	-0.203497064342881	0.83883812479064	442	-0.056112740096171	-1.16480208633559	0.244497218682717	432	-0.0222862111884478	-0.467556927966083	0.640305277902859	442	-0.0813912304939566	-1.69150624507596	0.0911068689301999	432	-0.0215196684302122	-0.451470073142116	0.651848131935196	442	-0.086480640952578	-1.79779154811054	0.0725543752104742	432	-0.0381561542786062	-1.22635255384798	0.22023378784423	1034	-0.138704478968413	-3.42244390647752	0.000636671426848041	603	-0.0247571316775416	-0.795479381552471	0.426470371832474	1034	-0.12507763883176	-3.08245804089306	0.00209002158159371	603
cg00202479	`VARS	NM_006295	Body	chr6:31763240-31763905	N_Shelf	rs200603055;rs113020176;rs534097503	46;40;39	0.001000;0.000200;0.000200		-0.13712105558937	-2.89450841843597	0.00387335045891812	442	0.000771985021293661	0.0160082252997958	0.987235253211616	432	-0.145228667494281	-3.06803458411382	0.00220706136653232	442	-0.0212976619572379	-0.441704510528492	0.658900931156471	432	-0.147405096427533	-3.11468651655057	0.00188849921952297	442	-0.0212916211279513	-0.441579188397471	0.65899158046714	432	-0.038118705022542	-1.2251477532656	0.220687283759885	1034	-0.0878856484603582	-2.16011615530019	0.0309415327846415	603	-0.0382908947608033	-1.23068739244057	0.218607655538512	1034	-0.0853103907681065	-2.09650587341056	0.0362279754010762	603
cg00205703	`FAM131A;FAM131A	NM_001171093;NM_144635	5'UTR;TSS1500	chr3:184056419-184056671	N_Shore	rs576804594	29	0.0002		-0.0345426231640107	-0.724860567532005	0.468834438130066	442	-0.105101533951126	-2.18751031509096	0.0289462567592738	432	-0.034908509789987	-0.732544736303089	0.464135431498883	442	-0.11647590120423	-2.42630795275041	0.015429350520603	432	-0.0327854240898019	-0.687959420419912	0.491763251145051	442	-0.118473019674161	-2.46830060658935	0.0137409823588147	432	-0.0363832823918846	-1.16932024091111	0.242440697249791	1034	-0.043117136649963	-1.0576853665378	0.290474334129814	603	-0.0258724568095788	-0.831331909598901	0.405926075592195	1034	-0.0380535883232079	-0.933345877534288	0.350899949722201	603
cg00209037	`			chr22:46440393-46441019	S_Shelf	rs546047500;rs117371401;rs113327325	20;2;1	0.000200;0.003994;0.011781		0.00344852795017534	0.072337219300084	0.942366301184963	442	-0.0739938829393537	-1.53717932261538	0.124640529186632	432	-0.00371001201159746	-0.0778222255462062	0.938004701127459	442	-0.0930980957539266	-1.93612983408669	0.0531620387692574	432	-0.00208642773717369	-0.0437653409425278	0.965111283265303	442	-0.0985346843131874	-2.04991021727579	0.0406526870340584	432	-0.0202707403143369	-0.651281817233218	0.514980793866012	1034	-0.0897694499753881	-2.20666542054462	0.0275059408397099	603	-0.021360910615677	-0.686318457846514	0.492633575060192	1034	-0.0879475650064125	-2.16164588184629	0.0308230282923636	603
cg00209923	`ANP32A	NM_006305	3'UTR			rs573682125;rs79164533	3;40	0.000200;0.500000		-0.000998548153341222	-0.0209457297326177	0.98329843977365	442	-0.096275997664947	-2.00262443512038	0.0455100886433811	432	0.0114157358351175	0.239468897857481	0.810849489864175	442	-0.0895442375241224	-1.86181563307806	0.0629582121342126	432	0.00993050431068809	0.208310863456334	0.835079969324168	442	-0.0919474738693724	-1.91206401347887	0.0561844664321945	432	-0.0435393691736126	-1.39957647529552	0.161808095699505	1034	-0.108006717864326	-2.65818590023857	0.00794295548884197	603	-0.0489381393499606	-1.57338268161249	0.115791222206167	1034	-0.10675202047736	-2.62706780960799	0.00870391484897362	603
cg00210856	`EBF1	NM_024007	Body			rs574933048;rs540363342	38;1	0.000599;0.000200		-0.0505086450904292	-1.06038061239696	0.289348065888988	442	-0.120584311430034	-2.51271586707185	0.0121349833817324	432	-0.0880246642571104	-1.85121212868453	0.064463222383881	442	-0.158309732911275	-3.31062472290826	0.000960950888704015	432	-0.0852056539497717	-1.79163305569325	0.0735296326975811	442	-0.16114479724043	-3.37095305742742	0.000774859281870533	432	-0.0294482130183499	-0.946290285053552	0.344152310727695	1034	-0.0326908357370708	-0.801711364562872	0.422954187866167	603	-0.0429851513985011	-1.38173897851899	0.167220097142364	1034	-0.0575337146160914	-1.41201571329123	0.158233193607719	603
cg00221718	`									-0.0562194529584778	-1.18051396542699	0.238186243579879	442	-0.0886221838654252	-1.84254257254174	0.0657296470986856	432	-0.0490754480961739	-1.03024289453822	0.303267821735046	442	-0.0993265067540051	-2.06649208891704	0.0390569322796318	432	-0.0479482751110056	-1.00654333744542	0.314521995164504	442	-0.103472714802526	-2.15336301510688	0.0315407220059402	432	-0.027343415060656	-0.878619573067293	0.379752713152671	1034	-0.122095858586909	-3.008224928094	0.0026714356547419	603	-0.0141201653013277	-0.45363702657879	0.650174623678938	1034	-0.0998856450865575	-2.45691955501426	0.0141336846581659	603
cg00228735	`					rs535393687	1	0.0002		0.0284466593081048	0.596863190790741	0.550851977610708	442	-0.0489356301065161	-1.01556199616166	0.310215914567157	432	-0.00942398831941072	-0.197685099068013	0.843380453453454	442	-0.0870792347258461	-1.81029843953697	0.0705909683475372	432	-0.00866017110145648	-0.181661823106923	0.855930003360444	442	-0.0918504736816692	-1.91003544263811	0.0564456537927557	432	0.00709698151127402	0.227992632954382	0.819695643637755	1034	-0.105407083254297	-2.5937210158609	0.00959115568490136	603	-0.0205670554864688	-0.660804840593775	0.508855080865786	1034	-0.126535291015117	-3.11876750991265	0.00185018538510973	603
cg00257455	`			chr1:65532161-65533212	N_Shore	rs575856828	31	0.001597		-0.118567161823727	-2.49883969855806	0.0126142584057375	442	-0.179422966826829	-3.76130839323233	0.000177613863923011	432	-0.0891712023452097	-1.87545239348719	0.0610488606337772	442	-0.146028730229753	-3.04992010433229	0.00234479791834255	432	-0.0853700023676983	-1.79510571738789	0.0729739560405885	442	-0.150622820686746	-3.14732841338144	0.00169239146408845	432	-0.109271635742091	-3.52439711190693	0.000431514823596562	1034	-0.116828503065456	-2.87722426140083	0.00406931532418049	603	-0.0785182769528816	-2.52758340422928	0.011547799916001	1034	-0.0851842110747674	-2.09338989607446	0.0365056234881526	603
cg00258316	`					rs144161813;rs113205285	29;19	0.006989;0.002196		-0.0166627232645397	-0.349552584950809	0.726829603712416	442	-0.0717096860835793	-1.48956045578899	0.136736214714239	432	-0.00790056940302095	-0.165727190141801	0.868446411093218	442	-0.0709482275289089	-1.47368976713615	0.140962992078349	432	-0.00780515950185728	-0.163725731744517	0.870020929029306	442	-0.0681213697360056	-1.41478595116465	0.157533431522901	432	0.00129052784429365	0.0414579161679647	0.966938851988577	1034	-0.0542688476668381	-1.33172554093318	0.183240116078097	603	-0.016355038559368	-0.52544848991784	0.599368048678566	1034	-0.0719217801955318	-1.76623375109185	0.0776080221827314	603
cg00263619	`CCDC41;CCDC41	NM_001042399;NM_016122	Body;Body			rs536310316	30	0.0002		-0.106792551846585	-2.24867406649324	0.0247520068815221	442	-0.138398440116472	-2.88842806398381	0.0039502841668632	432	-0.0866516062507272	-1.82218923105352	0.0687572485285645	442	-0.123752542486941	-2.57940916959191	0.0100356240009231	432	-0.0869772263285391	-1.82907136436036	0.0677182987649302	442	-0.128280095112943	-2.67480964283742	0.007594972280204	432	-0.0729317384828201	-2.34708168739463	0.019003062847647	1034	-0.122821495377539	-3.02628496412773	0.00251775287758944	603	-0.0632067918576428	-2.03321333692728	0.0421492950490895	1034	-0.116467715998182	-2.86825744815465	0.00418585029207049	603
cg00278366	`RAD9B;VPS29;VPS29	NM_152442;NM_016226;NM_057180	Body;TSS1500;TSS1500	chr12:110939456-110940173	S_Shore					-0.0414015871822249	-0.868943729439406	0.38521584970159	442	-0.0263392852642517	-0.546309403048408	0.585093215253219	432	-0.0592300826814466	-1.24387664966019	0.213939218747348	442	-0.068842548603729	-1.4298110997462	0.1531724909558	432	-0.0576446397969184	-1.21050615431796	0.226477241765075	442	-0.0719427115656291	-1.49441763324606	0.135462383212361	432	-0.0369058545924702	-1.18613031913757	0.23573748778394	1034	-0.0554794430921014	-1.36149329208265	0.173647195114028	603	-0.0480327008150633	-1.54422714698406	0.122695918743331	1034	-0.0690760013163079	-1.69612010466017	0.0901248624289797	603
cg00287915	`LPCAT1	NM_024830	Body			rs149154020;rs560405357;rs36979;rs548968701;rs568009302	0;6;15;34;49	0.000200;0.000200;0.087959;0.000399;0.000200		-0.043106150173156	-0.904762904293071	0.365937645195374	442	-0.0758732495142791	-1.57637077069676	0.115326339609967	432	-0.0498052386692216	-1.04558862172316	0.296125317869475	442	-0.139702810001259	-2.91600934397558	0.0036196564117964	432	-0.0509198753696629	-1.06902889445963	0.285434508862658	442	-0.143664039618495	-2.9998339801253	0.00276350005767777	432	-0.0470969905891873	-1.51409952013527	0.130164690462446	1034	-0.154978178571359	-3.83020055068786	0.000132984277576602	603	-0.0245931772523967	-0.790209176671131	0.429540643612379	1034	-0.124217046952834	-3.06102740327927	0.00224464939598989	603
cg00300627	`			chr9:132648043-132648284	N_Shore	rs141043793;rs567259144	50;35	0.010982;0.000200		-0.0938447473632162	-1.9743135212143	0.0486393972968738	442	-0.08870226317586	-1.84421628953949	0.0654850435134096	432	-0.0704635840710212	-1.48051016359301	0.139125354153088	442	-0.0655610109845475	-1.36145492299455	0.173774363740842	432	-0.0691777265916067	-1.45340565332209	0.146501630757388	442	-0.0671422572770421	-1.39438934608135	0.16360327434252	432	-0.0649108844720101	-2.08818247904903	0.0368933351907505	1034	-0.135569297206642	-3.34411073694014	0.000845173462736916	603	-0.0400443476422989	-1.28710320201449	0.198226975487894	1034	-0.120529720226808	-2.96925708411994	0.00303266588174303	603
cg00317577	`CPEB1;CPEB1;CPEB1;CPEB1	NM_001079535;NM_001079534;NM_030594;NM_001079533	Body;Body;Body;Body			rs530546638	44	0.0002		-0.0513668345364754	-1.07842897645261	0.281221554756633	442	-0.126952494345848	-2.64682415360543	0.00824887828878044	432	-0.0403250758758536	-0.846324866328906	0.397703662344679	442	-0.155390875918399	-3.24857132883776	0.00119494772674192	432	-0.0379543045142331	-0.796518824596689	0.426048998097751	442	-0.158886829109175	-3.3229004204588	0.00092001923972813	432	-0.042862840824542	-1.37780252828123	0.168432561802715	1034	-0.0950949343329338	-2.33834664250949	0.0195117646557176	603	-0.0458984166738703	-1.47551219272117	0.140240601019632	1034	-0.0985404161551128	-2.42361301336213	0.0154933360594073	603
cg00327947	`									-0.0855753710229735	-1.79944526960601	0.0722844045535774	442	-0.103720095949667	-2.15854847121498	0.0311343183673189	432	-0.0463428673074422	-0.97279299489478	0.331017536668029	442	-0.0935712426815155	-1.94602743940104	0.0519590814085653	432	-0.0448327409711406	-0.941050342444435	0.347033844124698	442	-0.0983770280060341	-2.04660898583082	0.0409768991756798	432	-0.102027111263705	-3.2890404473168	0.00101845329239035	1034	-0.163688497596995	-4.04930049086143	5.38000874116837e-05	603	-0.0621563482225654	-1.99933498008498	0.0456943066877704	1034	-0.108326138101697	-2.66610928712124	0.00775897862471577	603
cg00336376	`ZNF831	NM_178457	Body	chr20:57797223-57797441	S_Shore					-0.0868467127489012	-1.82631285146118	0.0681331699637067	442	-0.115368014200027	-2.4030213938943	0.0164423074749043	432	-0.0559000781120348	-1.17379358194138	0.240867550321156	442	-0.1245678246689	-2.59657992179887	0.00955047347415053	432	-0.0549026943142241	-1.1528078694042	0.249377202544964	442	-0.128957251503729	-2.68908765497697	0.00727961282126381	432	-0.0873548131271038	-2.81342303080255	0.00493958746325288	1034	-0.132319585243282	-3.26298755201164	0.00112661320416423	603	-0.0474054029475513	-1.5240293623402	0.127664998061645	1034	-0.0798423332667154	-1.96153409741321	0.0500338810101663	603
cg00344577	`			chr17:79503586-79504181	S_Shore	rs572725254;rs145998637	0;1	0.000599;0.000799		-0.109974222363453	-2.3162067131774	0.0207475720955773	442	-0.0188247975839869	-0.390405431829287	0.696413061451796	432	-0.1097774306101	-2.31202833016692	0.0209778224137385	442	-0.0321046824502757	-0.66596573370821	0.505716999128288	432	-0.111548915282976	-2.34964801990932	0.0189829184571611	442	-0.0340598490682546	-0.706553365181561	0.480141847171193	432	-0.0748153355554041	-2.40792383749355	0.0161187669963107	1034	-0.0923706864773352	-2.27096887195049	0.0233045385791962	603	-0.0622944291665295	-2.00378803907684	0.0452144507728149	1034	-0.0617222415187952	-1.51506525752484	0.130037566473462	603
cg00350296	`CD248	NM_020404	TSS1500	chr11:66083572-66083782	S_Shore					-0.122381982148816	-2.58003868103326	0.0100142991368505	442	-0.14670287480555	-3.06420549966379	0.00223651982854435	432	-0.0917630722913895	-1.9302685801214	0.0538782469285542	442	-0.139993046737673	-2.9221478750575	0.00354958835078333	432	-0.0901150864191783	-1.89541186658237	0.0583513007177767	442	-0.143110797661232	-2.98812088982825	0.00287080450045569	432	-0.0933994020903573	-3.00920373803775	0.00264465444489485	1034	-0.170721956228914	-4.22668799074443	2.5028965913267e-05	603	-0.050980955990077	-1.63917189950784	0.10133419320118	1034	-0.112119000361722	-2.76023611499701	0.00584802846354473	603
cg00364287	`P2RX7;P2RX7	NM_002562;NM_002562	5'UTR;1stExon			rs575837631;rs201308543	39;17	0.000200;0.001398		-0.0766913022101477	-1.61185537080011	0.107365413462082	442	-0.132020812498292	-2.75371550537221	0.00599437572829761	432	-0.0434369693883773	-0.911715244514031	0.362266887334577	442	-0.122085613063944	-2.5443127006994	0.0110961435210004	432	-0.0395366690415717	-0.829760693037193	0.407001805580007	442	-0.126749567824411	-2.64254736102222	0.00835313423770171	432	-0.0685161678234395	-2.20451923758505	0.0275861885121948	1034	-0.188100995827093	-4.66692344762271	3.30307093317332e-06	603	-0.0310698523896434	-0.998432809123319	0.318225703412471	1034	-0.134529292115103	-3.31814105300901	0.000927241424598803	603
cg00376553	`TSC22D4	NM_030935	Body	chr7:100075303-100075551	N_Shelf	rs77948633;rs571762311	48;44	0.006390;0.000200		-0.0526037272715434	-1.10444456703915	0.2697829579653	442	-0.106950364266429	-2.22628436661677	0.0262252427515282	432	-0.0572126421266543	-1.2014145099085	0.229982372783654	442	-0.132881175403028	-2.77187494740739	0.00567210796504541	432	-0.0553443192831707	-1.16209970724491	0.245583782253058	442	-0.136961824664984	-2.85806215564263	0.00434586323151351	432	-0.0360121813398849	-1.15738306873884	0.247281497551451	1034	-0.0385829200992002	-0.946341687438668	0.344234923935974	603	-0.0424755350796704	-1.36533773110714	0.172315390227098	1034	-0.0470024499540155	-1.15312890116442	0.249141541766694	603
cg00376625	`			chr10:65389875-65390835	N_Shore					-0.0898500900587423	-1.88980788127823	0.0590984879570656	442	-0.076517211878879	-1.58980223822711	0.112263407348716	432	-0.0606630144611241	-1.27404248910257	0.203043624516048	442	-0.0514898987326372	-1.06866234996483	0.285608432669407	432	-0.0570496398130355	-1.1979841479357	0.231314875906334	442	-0.0510875596655107	-1.06029726474224	0.28939471335758	432	-0.0653500831402868	-2.10235173539054	0.0356327807145846	1034	-0.103394924459614	-2.54384873266608	0.0110689140102965	603	-0.0237215337216544	-0.76219148794254	0.446077230090837	1034	-0.0516232249677299	-1.26668493765608	0.205557215893063	603
cg00386008	`SETD1B	NM_015048	3'UTR	chr12:122265374-122265954	S_Shelf	rs149148456;rs528404121	0;14	0.000399;0.000200		-0.0743105821977762	-1.56163064159588	0.118754198937545	442	-0.0615975797134825	-1.27893377565946	0.201324950621266	432	-0.06376791835078	-1.33942463476147	0.180828109511778	442	-0.0725928917100325	-1.5079708396191	0.131956470916887	432	-0.0621464128455529	-1.30527629019645	0.192194536686177	442	-0.0753767792615274	-1.56601652679988	0.117732145115533	432	-0.0411843747530531	-1.32378681027967	0.185742611740546	1034	-0.116997464446061	-2.8814238026137	0.00401575703948253	603	-0.0329185970829051	-1.0578841560046	0.290268681562658	1034	-0.101810046652558	-2.50458159126173	0.0123714405731531	603
cg00387090	`			chr1:201617041-201619788	N_Shore	rs139992387;rs559276684;rs528117973	10;44;49	0.000998;0.000200;0.000200		-0.0206696606761332	-0.433632221422197	0.664745638658292	442	-0.109369733725469	-2.27704736122549	0.0229993969808251	432	-0.0428723355843543	-0.899849287346535	0.368545943275856	442	-0.144614265523285	-3.01995634978477	0.00258768521625402	432	-0.0416209347425131	-0.873552744884406	0.382700965271772	442	-0.150860448623386	-3.1523705437107	0.00166367688238964	432	-0.0227933847681738	-0.732358789596431	0.464077202026666	1034	-0.0335960850905173	-0.823928231761695	0.41021911302176	603	-0.0371241456089253	-1.19315248612554	0.232976530523729	1034	-0.0505990852109962	-1.24151208035967	0.214705216317112	603
cg00387445	`SNX27	NM_030918	TSS1500	chr1:151584374-151585205	N_Shore	rs374144155;rs569015001;rs536395680	41;49;50	0.000399;0.000599;0.000799		-0.0584299246242601	-1.22703410019571	0.22020323101484	442	-0.102149521178703	-2.12563155892282	0.0337923047437552	432	-0.0460049479019907	-0.965689592914188	0.334559449286529	442	-0.0973726685766184	-2.0255807034539	0.0430939718352148	432	-0.0445711327745884	-0.935551815082203	0.349857585933549	442	-0.100645529131232	-2.0941201263742	0.0365164683104244	432	-0.0633672260083381	-2.03838797069201	0.0416288745576717	1034	-0.119193862655938	-2.93603077055651	0.0033753081520444	603	-0.0505461791576117	-1.6251687139099	0.104284318183891	1034	-0.0979711050614888	-2.40952012445737	0.0161024939981858	603
cg00390724	`			chr3:18485112-18487056	N_Shore	rs528307161	23	0.0002		-0.0615273585805541	-1.29224105381867	0.196669296944777	442	-0.14276341322729	-2.98076712797983	0.00294010480569963	432	-0.0105699570080993	-0.221725546297802	0.824627197939646	442	-0.0963961513365855	-2.00513933456332	0.0452399427937608	432	-0.011316439101977	-0.237385762893604	0.812464096026864	442	-0.0961659964536248	-2.00032208518917	0.0457585949228414	432	-0.102970953716715	-3.31968309216646	0.000913375988506432	1034	-0.119766658431466	-2.95027639590426	0.00322429761658452	603	-0.0699554337187875	-2.2509780172556	0.0244798598628946	1034	-0.0763849871951239	-1.87625578314952	0.06085306045028	603
cg00395296	`NDUFA6	NM_002490	3'UTR			rs533228811;rs557777752;rs545892228;rs114906790	1;4;38;48	0.000399;0.000200;0.000200;0.001597		-0.0486102055188292	-1.02046054674532	0.307880258608076	442	-0.09891030576782	-2.05777592990284	0.0398889621264252	432	-0.0365279743429458	-0.766558313100686	0.443653867542313	442	-0.0859145638262342	-1.7859652529652	0.0744518907500242	432	-0.0344062411205754	-0.721996389613107	0.470592653233451	442	-0.0913958581524946	-1.90052852549869	0.0576832303952807	432	-0.0504749238281676	-1.62287379872583	0.104774245341503	1034	-0.118456282431462	-2.91768980481626	0.00357921668560419	603	-0.058496652276806	-1.88133858149689	0.0600609568252407	1034	-0.124879188350801	-3.07751577123898	0.00212478783143162	603
cg00404025	`WDFY4	NM_020945	TSS1500			rs565315269;rs188984746;rs552863145;rs370495361	42;41;18;1	0.000200;0.007188;0.000200;0.000200		-0.0348753503787789	-0.731848330788866	0.464560211384252	442	-0.0609989749915613	-1.2664740263278	0.205747671094469	432	-0.0339453955628578	-0.712318307599825	0.47656055299947	442	-0.0708841552038859	-1.4723544195205	0.141323166492265	432	-0.0332794333131887	-0.698333164744465	0.485257191576699	442	-0.0754550889203449	-1.56764967910502	0.117350084985824	432	-0.0628673611844974	-2.02226570668951	0.0432684846584302	1034	-0.122454204056883	-3.01714321430876	0.00259450362868215	603	-0.0553931418116608	-1.78131463142956	0.0750060598688635	1034	-0.109803790484997	-2.70277047854554	0.00695651989631228	603
cg00417304	`PRDM11	NM_020229	Body			rs535927831	1	0.0002		0.124632160174182	2.62796997882468	0.0087144988281589	442	0.153586748534171	3.21024541917211	0.00136472391274734	432	0.0657281676536874	1.38071629186521	0.167760812114665	442	0.107512137840593	2.23806905848058	0.0254433661864486	432	0.0642139663520686	1.34881948715297	0.177790439415241	442	0.111537915190539	2.32256304118105	0.0204061691296076	432	0.0811284153779091	2.61197121494162	0.00905680490837564	1034	0.155640816156901	3.84684683719088	0.000124341999646652	603	0.0587858397819667	1.89066071675706	0.0588037521684025	1034	0.119795457133825	2.95099268168247	0.00321686989157843	603
cg00423486	`RERE;RERE	NM_012102;NM_001042681	Body;Body			rs577013369	29	0.0002		-0.0959424427500752	-2.01871499386946	0.043798381763625	442	-0.0727609430508698	-1.51147413055377	0.131061796067021	432	-0.0733983570537882	-1.54239070025476	0.123360288484824	442	-0.069613785240769	-1.44588081860749	0.148610759921881	432	-0.0707764655203124	-1.4871061155486	0.137374379963233	442	-0.0718995015337024	-1.49351695204839	0.135697897976413	432	-0.0843345667230376	-2.71567795925199	0.00665953965045198	1034	-0.128731721103571	-3.17350537578248	0.00153610751865045	603	-0.0466322850220222	-1.49913810686462	0.134002563662832	1034	-0.07731890292678	-1.8992870381475	0.0577554869590433	603
cg00423969	`FER1L5;FER1L5	NM_001113382;NM_001077400	Body;TSS1500			rs548855833;rs565547721	0;32	0.000200;0.000399		-0.00994606935777049	-0.208637390889352	0.834825183304241	442	-0.0548054878788529	-1.13761069053872	0.255678486939079	432	-0.021320792471671	-0.447296500883608	0.654856648935709	442	-0.101713478464359	-2.11649465185388	0.0345636791142907	432	-0.0207491017771669	-0.435299306993636	0.663535973243733	442	-0.104366371007243	-2.17209657468131	0.0300936751479922	432	-0.0219609510951846	-0.705603661444577	0.480558606374797	1034	-0.0822360230209313	-2.02060408520246	0.0435264666088951	603	-0.0377011886640352	-1.21171583772238	0.225788574298875	1034	-0.0897210056779985	-2.20546815093952	0.0275899985450646	603
cg00426377	`C1orf113;C1orf113	NM_024676;NM_001162530	Body;Body	chr1:36786500-36789402	N_Shore	rs143835882;rs141986481;rs2358729;rs2358728;rs144085863	49;15;8;6;2	0.000200;0.000220;0.021565;0.021565;0.000200		-0.0346618414073561	-0.727364308269699	0.467300467976309	442	-0.0732992559662808	-1.5226966793211	0.128227453097918	432	-0.0524145074610713	-1.10046448488571	0.271511917231616	442	-0.113668592408559	-2.36731313058965	0.0181092570076165	432	-0.0497895437495042	-1.04525858388845	0.296277734625184	442	-0.118343678197402	-2.46558038567978	0.0138451863253874	432	-0.0128629658264841	-0.413242441148402	0.679506498315892	1034	-0.0788162465829667	-1.93621996559819	0.0530626793877653	603	-0.0270866813157361	-0.870365950783383	0.38424470544385	1034	-0.0919579735909874	-2.26076441164615	0.0239315479828159	603
cg00430895	`			chr18:13136596-13137564	N_Shore	rs561806119	11	0.000399		-0.0595935849811441	-1.2515285477203	0.211136266513143	442	-0.107278924540882	-2.2331766160925	0.0257654782644417	432	-0.0604241390600077	-1.26901336200275	0.204831432898174	442	-0.134725618062926	-2.81081937192249	0.00503314795742082	432	-0.0593048872873003	-1.24545129546662	0.213360228242704	442	-0.139160666874261	-2.90454433078901	0.00375390552344639	432	-0.0241496710185749	-0.775953178949932	0.437909884048714	1034	-0.11747419850332	-2.89327395324184	0.00386806329871447	603	-0.00763876899614262	-0.245398369454089	0.806194934766745	1034	-0.102181530265171	-2.51378436179791	0.0120545512617278	603
cg00439318	`SPG7;SPG7	NM_003119;NM_199367	Body;Body	chr16:89603563-89603896	N_Shore	rs557715993;rs575880107;rs150026514;rs114182478;rs185017455	0;1;19;26;47	0.001797;0.000200;0.000399;0.006190;0.000200		-0.0616049953009473	-1.29387577163015	0.196103975262491	442	-0.0695598461730593	-1.44475687177725	0.148926399294754	432	-0.0401284342593951	-0.842193391451438	0.400010745814618	442	-0.0553014726072622	-1.14792691628655	0.251395217717671	432	-0.0381886094451051	-0.801440780371794	0.423196375282355	442	-0.0548177514615132	-1.13786575990974	0.255571974355095	432	-0.0438882165148163	-1.41080456712191	0.158469918785116	1034	-0.0972880895479072	-2.39261465753162	0.0168609432481713	603	-0.031857294104763	-1.02375425116059	0.306109449394354	1034	-0.0858112215420222	-2.1088744369657	0.0351435777498548	603
cg00446697	`HCCA2	NM_053005	Body			rs533432091	2	0.0002		-0.0502345410809679	-1.05461633245922	0.291976546751814	442	-0.0314122392795187	-0.651592429017907	0.514943100606085	432	-0.0455376385504858	-0.95586664990366	0.339497521065462	442	-0.0464934326757294	-0.964803927203392	0.335011134013336	432	-0.0461963278076969	-0.969712561585747	0.332550516090617	442	-0.0457630693954564	-0.949626496421828	0.34266696892973	432	-0.0498853309671964	-1.60388545739406	0.108898418170016	1034	-0.101780408437997	-2.50384739354668	0.0123970372837138	603	-0.0505351217489741	-1.62481258767281	0.104360225800301	1034	-0.0857505303740344	-2.10737554531065	0.035273496848967	603
cg00448761	`RFX2;RFX2	NM_000635;NM_134433	5'UTR;5'UTR			rs534121762	16	0.0002		-0.0828162569631745	-1.741156360498	0.0820048105739608	442	-0.0631114768112178	-1.31044915469641	0.190448914719999	432	-0.0762897314372458	-1.60338237730459	0.109223547698406	442	-0.0703116703977896	-1.46042365788587	0.144572664805181	432	-0.077519355739168	-1.62932865188792	0.103612700399396	442	-0.0725123760938097	-1.50629239713667	0.13238678896527	432	-0.0496189724213346	-1.59530752106814	0.11080314459196	1034	-0.0947730460879439	-2.33038368929592	0.0199299131660087	603	-0.0316250490492253	-1.01628591083016	0.309650792971738	1034	-0.0690287678007886	-1.69495661299547	0.0903455378523854	603
cg00448868	`DYNC1LI2	NM_006141	Body			rs141653891;rs554517157;rs568031301	27;29;38	0.004792;0.000200;0.000200		0.0440177919100246	0.923922021238482	0.355877939685581	442	-0.0394278883568651	-0.818018156122195	0.413678862974901	432	0.0121365445208793	0.254590806129969	0.799153279095636	442	-0.0588879964345966	-1.22254196912197	0.221905101159505	432	0.0114803416914558	0.240824259363794	0.809799401783244	442	-0.0621279405821261	-1.28997382324513	0.197464530244741	432	-0.0215226855146698	-0.691517827559613	0.489362177440483	1034	-0.0364378293611864	-0.893680024833481	0.371744991531133	603	-0.0486356052860981	-1.56364066075187	0.118063527254955	1034	-0.0617139863088138	-1.51486210472997	0.130089032567523	603
cg00460436	`Magmas	NM_016069	TSS1500	chr16:4400955-4401572	S_Shore	rs543819340	4	0.0002		-0.0751815676529161	-1.58000323505655	0.114482807755402	442	-0.140465125661853	-2.93213347090327	0.00343824338348056	432	-0.0727185702720921	-1.52805485371901	0.12688222614478	442	-0.133569785685689	-2.78641229862861	0.00542548798105719	432	-0.06910904742978	-1.45195810662656	0.146903837427022	442	-0.136473873311741	-2.84775104794677	0.00448815378869919	432	-0.0704100901500017	-2.26565604317669	0.0235636829011819	1034	-0.117284619614365	-2.8885614409922	0.0039261956453545	603	-0.0533670298573187	-1.71603320520769	0.0863067400509321	1034	-0.0884735295494485	-2.17464117914043	0.0298319476397236	603
cg00460983	`									-0.0198466100981761	-0.416360677768344	0.677329130013126	442	-0.10581138351863	-2.20239560999793	0.0278741648900821	432	-0.0148718798605228	-0.311978185453541	0.755196148235033	442	-0.0733899924074894	-1.5245884066362	0.127754416527899	432	-0.0155855204614676	-0.326951110043754	0.743850335373728	442	-0.077373208167729	-1.60765827401247	0.10829134958453	432	-0.0261196399202815	-0.83927797686674	0.401454168955473	1034	-0.0855378047364546	-2.10212197766489	0.0357321028117772	603	-0.0329399481580663	-1.0585707986538	0.289955758005257	1034	-0.0948610138163488	-2.33255980856577	0.0198148709863919	603
cg00472758	`TBC1D24	NM_020705	3'UTR	chr16:2550047-2550508	S_Shelf	rs527330810	1	0.0002		-0.0967002169163975	-2.03475905322817	0.042152348220407	442	-0.127800297390139	-2.66469451493098	0.00782574989490746	432	-0.0884298681314614	-1.85977843756096	0.0632390148308263	442	-0.146856450856234	-3.0674602414735	0.00221250056888411	432	-0.0868968136671665	-1.82737176852178	0.0679736655834356	442	-0.151947376488027	-3.17543834874895	0.00153794248855121	432	-0.0517580502285721	-1.66420191405905	0.0962269852730791	1034	-0.128923633560223	-3.17828956869948	0.00151113552641552	603	-0.0488056465557735	-1.5691161924672	0.116782102298728	1034	-0.132835208700442	-3.27585437386892	0.0010768399743676	603
cg00473633	`					rs191489850;rs534112229;rs592461;rs1702940;rs1715485;rs8081559	0;26;27;32;40;45	0.002796;0.001597;0.186102;0.197584;0.186402;0.109026		0.00526922164688645	0.110529148668156	0.912039725281528	442	-0.0780738868489926	-1.62227616294036	0.105123211172432	432	0.00968001689574793	0.20305608987555	0.839182581036523	442	-0.0848418142577733	-1.76355689798921	0.0781585701971834	432	0.0121757188733108	0.255412655725084	0.798518875268413	442	-0.0889043244769188	-1.84843962722001	0.0648711669172849	432	-0.00917976494268985	-0.29490600024975	0.768121839121816	1034	-0.136654502564367	-3.37121706008746	0.000766743327458898	603	-0.00686681643914953	-0.22059827550184	0.825447527433354	1034	-0.131857115963873	-3.25144865507422	0.00117305147010627	603
cg00478851	`PPFIBP2	NM_003621	TSS1500	chr11:7534554-7535727	N_Shore	rs185558254	9	0.0002		-0.075187411387926	-1.58012651111977	0.114454562007248	442	-0.112857711911978	-2.35027984148745	0.0189553466400806	432	-0.0657305829873936	-1.3807671761705	0.167745159175643	442	-0.116288113762087	-2.42236044131626	0.0155970952102832	432	-0.0634908334646257	-1.3335888256922	0.182734350089835	442	-0.118190838780882	-2.4623660811341	0.0139692171488634	432	-0.0853176222707735	-2.74748726507647	0.00604831351381064	1034	-0.0940600098339245	-2.31274616047389	0.0208840621641628	603	-0.0590801238380853	-1.90014746896631	0.0575468685876051	1034	-0.049221000587903	-1.2076435482001	0.227471646305038	603
cg00481600	`CILP;CILP	NM_003613;NM_003613	5'UTR;1stExon							-0.117117502868103	-2.46800316887184	0.0137485741067481	442	-0.1119863388329	-2.33197936912322	0.0199027543851707	432	-0.107320532062221	-2.25987747664155	0.0240445819772667	442	-0.117173837614124	-2.44098092831693	0.0148196949249933	432	-0.106503236132444	-2.24253551028366	0.0251472190127382	442	-0.121814031572772	-2.53859605035059	0.0112780204984169	432	-0.0838298199386246	-2.69934763884832	0.00699444018494089	1034	-0.132621395401723	-3.27051867850805	0.00109722792457158	603	-0.0708086505883871	-2.27852385534176	0.0227851337830807	1034	-0.101980504658109	-2.50880426315755	0.012225131026956	603
cg00499700	`F2RL1	NM_005242	Body	chr5:76115510-76116089	Island	rs111972549;rs573698627	18;41	0.500000;0.000200		-0.0306162623346595	-0.642412909983102	0.520874571100926	442	-0.0796102678096844	-1.6543345201859	0.0984331120955707	432	-0.0294184021311425	-0.617263718925711	0.537321388082468	442	-0.105278766377548	-2.1912266055514	0.0286753206354932	432	-0.0296917551263814	-0.623002632719713	0.533545426759315	442	-0.109386391416793	-2.2773969649703	0.0229784341239845	432	-0.0569144116936674	-1.8303396539912	0.0673394433150711	1034	-0.1116864611737	-2.74949781896581	0.00604219365825284	603	-0.0413596634342379	-1.3294275248264	0.18387570137915	1034	-0.0938166306319752	-2.30672652625803	0.0212187094136327	603
cg00500176	`ICAM4;ICAM4;ICAM4;ICAM1	NM_001039132;NM_001544;NM_022377;NM_000201	TSS1500;TSS1500;TSS1500;3'UTR	chr19:10397603-10398703	N_Shore	rs183487091;rs547642698	25;48	0.000200;0.000599		-0.0188808297887905	-0.396094698710493	0.692209820682024	442	-0.0823791628162692	-1.71213073851435	0.0872352618879836	432	-0.0295327226456357	-0.619663811492379	0.53574059509441	442	-0.0939247036629087	-1.95342195040134	0.0510753018841232	432	-0.0287169478868042	-0.602537447294152	0.54707175309053	442	-0.10059226121093	-2.09300424187303	0.0366162756456039	432	-0.000420402691196378	-0.0135053350119262	0.989227239263255	1034	-0.0926815477613911	-2.27865553623535	0.0228417064930186	603	-0.0212249147192569	-0.681947641063883	0.495392702670836	1034	-0.10358005390613	-2.54843636887471	0.0109249868433842	603
cg00508526	`NDST3	NM_004784	TSS1500	chr4:118954410-118955207	Island	rs538534014	18	0.0002		-0.114719730257232	-2.41702200014108	0.0158224365628308	442	-0.0360074679618061	-0.746989692810172	0.45538061118302	432	-0.0939199371260319	-1.97590473981813	0.0484584431626534	442	-0.00206617268716362	-0.0428451297228972	0.965844852077701	432	-0.0935852465639528	-1.96882195682707	0.0492682693042966	442	-0.00311901552957219	-0.0646774923427436	0.94846075712727	432	-0.0769418573836234	-2.47663346043831	0.0133307392982409	1034	-0.0324426758208795	-0.795621190204651	0.426485223879867	603	-0.0423260698195177	-1.36052754808244	0.173831561369882	1034	-0.00574357368789924	-0.140806988109068	0.888068991126653	603
cg00511334	`NRN1L	NM_198443	1stExon	chr16:67918679-67918909	Island	rs137978586;rs191020381;rs115490984;rs143848598	5;15;25;42	0.000271;0.000200;0.006390;0.000200		-0.0210109020980651	-0.440793272113898	0.659555684418367	442	-0.0606942637959867	-1.26013191999063	0.2080258242858	432	-0.0204882971207875	-0.429826295591931	0.667510556052523	442	-0.0604271593736691	-1.25457273590612	0.210037756998971	432	-0.0190663709567142	-0.399988044688905	0.689341590557252	442	-0.0653161514403383	-1.35635557090448	0.175390583636002	432	-0.0535722559935299	-1.72264494793809	0.0851029693252569	1034	-0.0485715690206184	-1.19168438113797	0.233671470518807	603	-0.052794290760097	-1.69758211349132	0.0897389543682029	1034	-0.0502898053665965	-1.2339106487908	0.217524523062439	603
cg00520380	`LIMK2;LIMK2;LIMK2	NM_016733;NM_005569;NM_001031801	TSS1500;Body;TSS1500			rs540008842;rs561381511;rs530108352;rs543798972;rs563795205	45;40;39;37;36	0.000799;0.000998;0.000998;0.000998;0.000998		-0.111312168970759	-2.34461955001152	0.0192395718711937	442	-0.140382827543134	-2.93039257219418	0.00345742333256862	432	-0.0890424803367432	-1.87273068742913	0.0614245930456756	442	-0.143163287986791	-2.98923211949628	0.0028604633262986	432	-0.0870754961636535	-1.83114842058074	0.0674072912877142	442	-0.148168811129241	-3.09527926903765	0.00201665581985958	432	-0.0546279281222828	-1.75665771077275	0.0791234188786495	1034	-0.106927413133627	-2.63141726123621	0.00859377508037622	603	-0.0308924242139869	-0.992727495978347	0.320998492349037	1034	-0.0688088357726461	-1.68953918130429	0.0913787793875667	603
cg00528616	`ZNRF1	NM_032268	Body	chr16:75033041-75034207	S_Shelf	rs373550004;rs141509357;rs367723248	0;1;41	0.001198;0.001597;0.000998		-0.00729232715732544	-0.152967856475568	0.878492679039045	442	-0.0779908999255157	-1.62054476690288	0.105494567511627	432	-0.0158726385216422	-0.332975239718217	0.739301021011404	442	-0.0998514785991906	-2.07748718607538	0.0380284490661304	432	-0.0138318411553127	-0.29015765305194	0.771825252331657	442	-0.105070329879966	-2.18685602837639	0.0289941852307855	432	-0.0140600027574386	-0.451703935709361	0.651566474785228	1034	-0.12579257273036	-3.10026503632183	0.00196904427942843	603	-0.0109187684798125	-0.350776722313677	0.725822223408419	1034	-0.113903500624355	-2.80454964114544	0.0051049423938864	603
cg00531745	`			chr6:34191907-34192179	N_Shore	rs371772542;rs569882324;rs183250751	0;21;40	0.000399;0.000200;0.000200		-0.036146339927149	-0.758542497967765	0.448433569940967	442	-0.03738308777421	-0.775553619470649	0.438332227490264	432	-0.0468381632089254	-0.983205010702239	0.325869924647786	442	-0.0383674501740295	-0.795995118371076	0.426360583223502	432	-0.0487077704061848	-1.02251194217257	0.30690918234108	442	-0.0400850384031739	-0.831666682550596	0.405932964280534	432	-0.083401998535285	-2.68550721309017	0.00729004332478406	1034	-0.0795908379506171	-1.95532918334028	0.0507625380013064	603	-0.0909335687967287	-2.9293107373207	0.00342715475678725	1034	-0.0878389988715479	-2.15896362931653	0.0310310747502324	603
cg00533891	`ZMIZ1	NM_020338	5'UTR			rs575828128;rs58124651	36;12	0.000799;0.055112		-0.159921247671213	-3.38358059645766	0.000739840523407299	442	-0.136718270425385	-2.85291533211671	0.00441636811242628	432	-0.156531526729206	-3.31065130531445	0.00096017086847452	442	-0.130447728094056	-2.72052368157063	0.00662638003514643	432	-0.15579367772853	-3.29478717869013	0.00101553700171527	442	-0.131988029918417	-2.75302365573147	0.00600697400394992	432	-0.0517276175094682	-1.66322164586627	0.0964230495294182	1034	-0.118361496208855	-2.91533304871597	0.00360621598527075	603	-0.0327927188271692	-1.05383597766096	0.292118178280737	1034	-0.102482162721105	-2.52123245206986	0.0118033768356992	603
cg00534318	`			chr3:129033540-129035646	N_Shore	rs146943444	37	0.0002		-0.0785085786257316	-1.65020583020271	0.0992666111307133	442	-0.101123107766432	-2.1041252363977	0.0356319112060541	432	-0.0539937777176106	-1.13368558256602	0.257312464756695	442	-0.0958442876770588	-1.99358893055001	0.0464919211131741	432	-0.0521158403095589	-1.09418242944853	0.274256291363458	442	-0.100126123653508	-2.0832398610405	0.0374995930841756	432	-0.0785413003341843	-2.52832761424393	0.0115234067606397	1034	-0.155570322572855	-3.84507578303497	0.000125235645459124	603	-0.0425199885823996	-1.3667683728964	0.171866366608259	1034	-0.111295297469444	-2.73978762291501	0.00622275314365994	603
cg00534655	`PURA	NM_005859	TSS1500	chr5:139492723-139492966	Island	rs529288431	36	0.0002		0.0630210489772497	1.32369495447907	0.186000147661031	442	0.096035951589238	1.99760028053442	0.0460538508039982	432	0.0248003786351652	0.520323825091994	0.603062442697565	442	0.0604078227458776	1.25417029403515	0.210183950822643	432	0.0270279182520823	0.567080508802877	0.570901778732686	442	0.0573398864188776	1.19033088580915	0.234316599103854	432	0.056310223736211	1.81086785596434	0.0703034959008547	1034	0.0789829225412218	1.94033167292343	0.05256053611769	603	0.0535273120344871	1.72119698202641	0.0853654257441327	1034	0.0725521431068735	1.7817683506603	0.0750359407296132	603
cg00547480	`LDB1;LDB1	NM_001113407;NM_003893	Body;TSS1500	chr10:103879633-103880628	N_Shelf	rs534094065	36	0.0002		-0.0692050727853362	-1.45398203130171	0.146341716793136	442	-0.111233806089742	-2.31617767861587	0.0207538372715527	432	-0.0368974600956417	-0.774319171992274	0.439054074849628	442	-0.101965969290774	-2.12178528398573	0.0341152078226337	432	-0.0336379135264859	-0.705861136652719	0.480565276909444	442	-0.107516991842648	-2.23817089032264	0.0254366989376068	432	-0.0699961120145474	-2.2522912278932	0.0243966521069928	1034	-0.128782110804737	-3.17476151926959	0.00152951427415626	603	-0.0344407094356082	-1.10683718301529	0.268527608792341	1034	-0.0943678997354527	-2.32036177247586	0.0204672934968773	603
cg00551910	`C14orf162	NR_024630	TSS200	chr14:70038108-70040302	N_Shore	rs576000955	5	0.0002		-0.0615331852104587	-1.29236373872055	0.196626828355991	442	-0.0743629022428896	-1.54487380824946	0.122766961553686	432	-0.0452915065390685	-0.950693070828521	0.342117038625793	442	-0.0683194367543532	-1.41891236069498	0.156326495561867	432	-0.0469050058771908	-0.984610201468451	0.325179222204275	442	-0.0716918833046445	-1.48918938181543	0.136833910864848	432	-0.0364198861598936	-1.17049768826325	0.241966853201329	1034	-0.113266734448257	-2.78873509325244	0.00535972152807243	603	-0.0321667692642083	-1.03370626400169	0.301432299590998	1034	-0.105296345521246	-2.59097577760735	0.00966767368107923	603
cg00563348	`			chr15:41186255-41187169	N_Shelf	rs59469022;rs575896039;rs538218700	29;12;2	0.000599;0.000200;0.001198		-0.0268288329966742	-0.562901430834999	0.573742740111489	442	-0.0827083664573885	-1.71900408191574	0.085974934367021	432	-0.0372354748474305	-0.781419184180129	0.43487008531396	442	-0.111870856756658	-2.32955430053306	0.0200313543502658	432	-0.0350212843499995	-0.734913210997995	0.462692376651584	442	-0.113155395920744	-2.35653259925124	0.018640817562698	432	-0.0389729996918382	-1.25263259995165	0.210507703577515	1034	-0.0750994037999333	-1.84455746489306	0.0653404048984181	603	-0.0536634158333934	-1.72558187892809	0.0845726300326516	1034	-0.0805601475231686	-1.97924545468182	0.0480021161484821	603
cg00563932	`PTGDS	NM_000954	TSS1500	chr9:139872237-139873143	N_Shore	rs575591377;rs544340048;rs561007335	0;41;47	0.000200;0.000200;0.000200		-0.101860985311872	-2.14409013353187	0.0322730743197908	442	-0.08719580328543	-1.81273415086684	0.0702137179928341	432	-0.0997872107749065	-2.10014351618221	0.0359756806513184	442	-0.0909915710093698	-1.89207474462275	0.0588026039515058	432	-0.0986415449286465	-2.07587291641649	0.0381717947794304	442	-0.0937933052324273	-1.95067299761512	0.0514023692182753	432	-0.0701302015463646	-2.25662007112451	0.0241241017762396	1034	-0.119291812284651	-2.93846667093558	0.00334903802161415	603	-0.0640744842987579	-2.06120110147478	0.0393989514044524	1034	-0.109482903285766	-2.69480811118605	0.00712417198205716	603
cg00569813	`					rs567263523;rs150794840	51;3	0.000200;0.002796		-0.0550127270578471	-1.1551229279957	0.248428259939245	442	-0.0594878378266194	-1.23502427347611	0.217224483941582	432	-0.0549011954923802	-1.15277633479962	0.249390146066073	442	-0.0849924457351319	-1.76670314613195	0.0776292308313421	432	-0.0545861250589749	-1.14614749581941	0.252121424382529	442	-0.0867515317835108	-1.80345132155603	0.0716603949065216	432	-0.0363598250815831	-1.16856568232431	0.24274469984103	1034	-0.0978958099964211	-2.40765636802931	0.0161846112863174	603	-0.0304513517830398	-0.978544808596646	0.327959505718001	1034	-0.0736268175520288	-1.80825581910136	0.0708113075301925	603
cg00585790	`LIMS1;LIMS1	NM_004987;NM_004987	1stExon;5'UTR							-0.0821290040304464	-1.72664169587633	0.0845836083441566	442	-0.135887095225886	-2.83535344307612	0.00466482546129209	432	-0.0650469413950472	-1.36636541109325	0.172219370537312	442	-0.124989605392917	-2.6054644833914	0.00930775767606614	432	-0.0628914170849023	-1.32096495263363	0.18690883262423	442	-0.129560125657959	-2.70180154110653	0.00700875545661007	432	-0.0881232168468	-2.83829931568358	0.0045715411412528	1034	-0.116049697688714	-2.85786919463355	0.00432464182331063	603	-0.055854325808959	-1.79617603663757	0.072610120773551	1034	-0.0677345751097788	-1.66308002804455	0.0965625570374829	603
cg00587342	`PMM1	NM_002676	Body	chr22:41985525-41986045	N_Shore	rs182387703	45	0.000599		-0.0619756055533838	-1.30167955311985	0.193421677277937	442	-0.0867886855467302	-1.80422760305173	0.071538486278448	432	-0.068202562695532	-1.43285346910006	0.152291650327471	442	-0.0808475386396169	-1.68015733065653	0.0932955680818148	432	-0.066681133687133	-1.40079387875213	0.161669471984373	442	-0.0850604203417588	-1.76812296212802	0.0773913135792618	432	-0.0403110372478444	-1.29568439294862	0.195252949253091	1034	-0.0580012948619251	-1.42351696478209	0.154873723955119	603	-0.0638048227201277	-2.05250272740456	0.0402369293310539	1034	-0.0845581603104881	-2.07793071812634	0.0379100906401846	603
cg00589737	`			chr5:77253832-77254049	N_Shore	rs185520769;rs142480355;rs561543261	36;2;1	0.000599;0.001797;0.000399		-0.0218585150540247	-0.458581125112433	0.646735200246674	442	-0.0602633335949012	-1.25116315609362	0.211278678908152	432	-0.0519074446384936	-1.08979922747182	0.276182333608237	442	-0.106596886900683	-2.21886997530915	0.0267277471497195	432	-0.0508791050135135	-1.06817146686658	0.285820907981804	442	-0.110832853097431	-2.30775955833048	0.0212200775593291	432	-0.0163727260880137	-0.526016849667608	0.598973189291907	1034	-0.0238890815569152	-0.585759478845765	0.558219614054293	603	-0.0379082893010785	-1.21837841749383	0.223247771193435	1034	-0.0522064071916709	-1.28102046238795	0.200475986685467	603
cg00591515	`LENG8	NM_052925	Body	chr19:54971878-54972090	N_Shore	rs113155515;rs78422130;rs540771802;rs576662339;rs12462977;rs542204816;rs556027763;rs183286502	48;33;31;23;15;8;2;1	0.001997;0.040535;0.001398;0.000200;0.005747;0.000200;0.001797;0.003195		-0.114227344517035	-2.4065564874227	0.0162807369054036	442	-0.127576273403323	-2.65997205830437	0.00793563132254235	432	-0.11402703606458	-2.40229933235069	0.0164704801283418	442	-0.142858068954022	-2.9827708159387	0.00292107253849313	432	-0.113977612125311	-2.40124895580393	0.0165175939047089	442	-0.14523773368146	-3.03316223148218	0.00247793116115407	432	-0.0184410306645521	-0.592480793453201	0.553635991823125	1034	-0.0605168450225402	-1.48540379220708	0.137720773712388	603	-0.0222247174353178	-0.714081228868928	0.475302077951063	1034	-0.0672696068848663	-1.65162901477352	0.0988777969576772	603
cg00604771	`			chr16:32213542-32214210	Island	rs567179360;rs557949367	20;49	0.000399;0.000200		-0.111877295794469	-2.35662323713674	0.0186318671746235	442	-0.153657140075925	-3.21174036963523	0.00135770428694018	432	-0.0976574345450578	-2.05502924732817	0.0401479307979689	442	-0.13651236765347	-2.84856443735376	0.00447677756895699	432	-0.096170418412806	-2.02354158591816	0.0432975790817496	442	-0.139092143775968	-2.90309535905541	0.00377119088882732	432	-0.0499983370970288	-1.60752482910954	0.108098167084039	1034	-0.0106539875674546	-0.261195598582201	0.794027342837905	603	-0.0454799673773137	-1.46204149051303	0.143896036209108	1034	-0.0158343657914052	-0.388216696628542	0.697981151119796	603
cg00604840	`C5orf4;C5orf4	NM_032385;NM_032385	5'UTR;1stExon							-0.0423193984030679	-0.888229696206242	0.374759910545635	442	-0.0999467313195206	-2.07948229942016	0.0378443191124664	432	-0.0279369429235885	-0.586162785032227	0.558015475566665	442	-0.117492527738573	-2.44768167716942	0.0145484218621939	432	-0.0270460766361509	-0.567461680917002	0.570642989789296	442	-0.120137099919019	-2.50330597333245	0.0124606069850917	432	-0.052996817738181	-1.70410649826687	0.0885129553951749	1034	-0.158682409832076	-3.92330088521759	9.10241781625675e-05	603	-0.0302602126402817	-0.972398846759142	0.331006214835593	1034	-0.119452656013073	-2.94246680423696	0.00330630231740634	603
cg00609333	`MGST1;MGST1;MGST1;MGST1	NM_145764;NM_145791;NM_145792;NM_020300	TSS1500;5'UTR;5'UTR;5'UTR			rs371381488;rs11056900	13;14	0.000200;0.014776		-0.0273559892350692	-0.573967275952323	0.566234798617314	442	-0.0997057288123741	-2.0744344619446	0.03831166263418	432	-0.0252492451246045	-0.529745228236899	0.596516760782254	442	-0.0817863196360441	-1.69975389034333	0.0895423493199752	432	-0.0245481951537745	-0.515030757203088	0.606754029310164	442	-0.0871622219581828	-1.81203246067179	0.0703222276742024	432	-0.0142493633787375	-0.457788318672744	0.647189766418758	1034	-0.129797628205447	-3.20008046490501	0.00140205912390608	603	-0.032413395545038	-1.04163734267087	0.297739193503738	1034	-0.150864086709429	-3.72692715407347	0.000200613794750607	603
cg00609473	`REM2	NM_173527	TSS1500	chr14:23355738-23356402	N_Shelf	rs566356366;rs532280434	25;2	0.001398;0.000399		-0.0673990740416088	-1.41592151260566	0.15719144981305	442	-0.0797185560129838	-1.65659437414416	0.097974660408936	432	-0.0690196277551656	-1.45007343403934	0.147428767538782	442	-0.11067347097619	-2.30441349664077	0.0214079219547581	432	-0.0692468240796096	-1.45486203100164	0.146097822053313	442	-0.112808794168342	-2.34925238060832	0.0190074724853135	432	-0.0455058802695676	-1.46287566228193	0.143667571351263	1034	-0.139439092691518	-3.44080837055693	0.000595274170974399	603	-0.0349903557228869	-1.12451574240964	0.260958462805867	1034	-0.11901300470871	-2.93153318235399	0.00342430667818424	603
cg00621899	`UFSP1;UFSP1	NM_001015072;NM_001015072	1stExon;3'UTR	chr7:100486729-100488093	N_Shore	rs73396648;rs542379557;rs199673430	43;42;2	0.000200;0.000200;0.001997		0.144078202770482	3.04338647734979	0.00239461041564857	442	0.162789614718399	3.40597959157781	0.000682790945483997	432	0.0992187589060111	2.08810033115165	0.0370515392826716	442	0.134065653959466	2.79688233101387	0.00525391704068211	432	0.099314099761528	2.09012012045875	0.0368692131944018	442	0.134579216969852	2.80772747419245	0.00508138723122267	432	0.0916388160470951	2.95215701661197	0.00318423211836867	1034	0.170609416699683	4.22384628040685	2.53435088296193e-05	603	0.0519069143708288	1.66899702099963	0.0952725068705705	1034	0.111723954790604	2.75042860062615	0.00602513646658471	603
cg00622799	`RTEL1;RTEL1	NM_016434;NM_032957	Body;Body	chr20:62318359-62318658	Island					-0.0526382370954125	-1.10517046118918	0.269468444522966	442	-0.118966913255176	-2.47868861515418	0.0133493997326096	432	-0.0498568805735718	-1.04667456799844	0.295624181364924	442	-0.11435912707931	-2.38182095239904	0.0174149136571198	432	-0.0482996029694068	-1.0139299596302	0.310985206460501	442	-0.118295774024768	-2.46457291953284	0.0138839564079731	432	-0.0383746267865657	-1.23338122172106	0.217601474542474	1034	-0.163183010625393	-4.03656823059351	5.67740887313937e-05	603	-0.0265412971219787	-0.852833009746344	0.393894264491166	1034	-0.131367973016573	-3.23924579174733	0.00122408319143455	603
cg00634714	`RHBDF2;RHBDF2	NM_001005498;NM_024599	TSS1500;TSS1500	chr17:74496992-74497632	S_Shore					-0.0513510757787725	-1.07809754372819	0.281369374756804	442	-0.0810425240728936	-1.68422730152003	0.0925058442691552	432	-0.0488195897339037	-1.02486307493155	0.305798718823543	442	-0.105415910703325	-2.19410240664257	0.0284671636402407	432	-0.0473617852508072	-0.994213019819223	0.320484632375977	442	-0.109186322795857	-2.27319810460925	0.0232313069471523	432	-0.0268529833033813	-0.862852994222432	0.388361745336735	1034	-0.131525478367699	-3.2431749722323	0.00120743178919581	603	-0.0143311896363005	-0.460417504210211	0.645302260884348	1034	-0.103898820481261	-2.5563360428634	0.0106810489059874	603
cg00651497	`FBN1	NM_000138	Body							-0.0217829692810527	-0.456995708721228	0.647873699172741	442	-0.0594603932884282	-1.2344531512628	0.217437079306758	432	-0.0444476078161739	-0.932955590352391	0.351195923220631	442	-0.0904005383946931	-1.87971718056563	0.060471322595894	432	-0.0460630438508664	-0.966910811738961	0.333948788193513	442	-0.09553412252428	-1.98709777320689	0.0472082426124884	432	-0.0287574735967496	-0.924081638050994	0.355593511058558	1034	-0.0723034370522285	-1.77563909399095	0.0760423230345005	603	-0.0497117368871624	-1.59829492584988	0.110136828041297	1034	-0.0958207558319243	-2.35630400719863	0.0185968417979913	603
cg00674004	`			chr10:101281181-101282116	N_Shore	rs575533372	7	0.0002		-0.0698015097403938	-1.46655372899271	0.142886915598145	442	-0.162236811672995	-3.39420546214557	0.000712538568385641	432	-0.0595233095347659	-1.25004918992953	0.211676083724391	442	-0.131120677596816	-2.73472109989266	0.00634904890170978	432	-0.057264760901444	-1.20251135611503	0.229557464961874	442	-0.13648263019766	-2.84793608108321	0.00448556357817552	432	-0.0513653600696792	-1.65155321007549	0.0987815028414655	1034	-0.133911802159029	-3.30272538447068	0.000979391099482218	603	-0.0358642495802161	-1.15262465116693	0.24922989766696	1034	-0.112862652713259	-2.77870063080328	0.00552728404904346	603
cg00682367	`			chr20:48960164-48960373	S_Shelf	rs188431883;rs545562743	32;46	0.000399;0.000399		-0.0988306732390938	-2.07987916149674	0.0378016148046637	442	-0.157208846354845	-3.2872135947846	0.0010437304712624	432	-0.0635990151822669	-1.33586726478793	0.181988341230038	442	-0.124395030808567	-2.59294039529728	0.00965152166675037	432	-0.0599806109434816	-1.25967599592873	0.208181118950827	442	-0.130749700070673	-2.72689416085418	0.00650061821377139	432	-0.104364267317016	-3.36492921929978	0.000776477073013053	1034	-0.129266153995867	-3.18682887217533	0.00146749114409964	603	-0.058410836919054	-1.87857233216488	0.0604382816043944	1034	-0.0743602746422788	-1.82633572984274	0.0680412903699639	603
cg00686926	`GRK7	NM_139209	Body	chr3:141516055-141516639	N_Shore	rs530750382;rs116401630;rs530485399	34;46;49	0.000200;0.001797;0.000200		-0.155209582201962	-3.28223148089253	0.00106143824993427	442	-0.105582773849802	-2.197601499798	0.0282156498852139	432	-0.149101305951	-3.15106610457782	0.00167004796750455	442	-0.124320411662283	-2.5913687545689	0.00969545107530921	432	-0.148960936704901	-3.14805481280733	0.00168720533987456	442	-0.127271543731118	-2.6535487550477	0.0080873079099431	432	-0.0182204579032525	-0.58539256534974	0.558389994510612	1034	-0.130817263925993	-3.2255089201566	0.00128398102043473	603	-0.019095823487134	-0.613523266683751	0.539640957937426	1034	-0.132467000893807	-3.26666596630127	0.00111217081046415	603
cg00687135	`ZNF385D	NM_024697	TSS200			rs189218752;rs545260814;rs560433239	46;41;24	0.000200;0.000200;0.000200		0.0902000101504871	1.89720784016185	0.0581135098504062	442	0.1247904098145	2.60126842791291	0.00942169380659183	432	0.0532286197029244	1.11758922834307	0.264126675163553	442	0.0691884974216481	1.43701918030777	0.151113306794758	432	0.0572396571756064	1.20198304421047	0.229762058132691	442	0.0667916969390456	1.38708722519934	0.165818693883688	432	0.118969758807833	3.84006061583851	0.000125781673058347	1034	0.172236567846397	4.26494408486685	2.11401888799405e-05	603	0.106649237264269	3.43915966611368	0.000592440210688749	1034	0.164203999700924	4.06228724337309	5.09191964695727e-05	603
cg00687674	`MIR548H4;TMEM84	NR_031680;NR_026949	Body;Body			rs538635340;rs311888;rs139219983	0;29;36	0.000799;0.009984;0.002995		-0.130359004854425	-2.75008259778995	0.00605845157540861	442	-0.0183567689219731	-0.380696827289363	0.703600363852145	432	-0.113447240999676	-2.38997805841982	0.0170306467030372	442	0.0214091961473668	0.444018387779535	0.657228135995249	432	-0.112433417567357	-2.36843715132574	0.0180502536549482	442	0.0198575012149039	0.411828045786626	0.680650840434542	432	-0.0719798756227968	-2.31634194327096	0.0206250313328349	1034	-0.121383370847066	-2.99049531329728	0.00283060753806457	603	-0.042755733194976	-1.37435540440573	0.169499720619867	1034	-0.0823185170886923	-2.02264023595656	0.0433155541029745	603
cg00692173	`ZYG11B	NM_024646	Body							-0.0646437366190329	-1.35787200215402	0.174899596291505	442	-0.0920127464920793	-1.91342908435677	0.0560092752935483	432	-0.0645980138592994	-1.35690889164216	0.175205477400523	442	-0.114007604473214	-2.37443533186695	0.0177654127617563	432	-0.0625070400454804	-1.31287037036553	0.18962241705626	442	-0.116019821502944	-2.41672092770831	0.0158395259113588	432	-0.0700495834891347	-2.25401745002189	0.0242876482085859	1034	-0.0720581199531045	-1.76959357379821	0.0770457250298213	603	-0.0533059592464085	-1.71406572964505	0.0866675942625371	1034	-0.0703853342954958	-1.72837564012312	0.0841780237401764	603
cg00697290	`			chr3:22413492-22414365	N_Shelf					-0.0740963663863793	-1.55711233430704	0.119823577403201	442	-0.0541147672922253	-1.12324499573145	0.261727259458815	432	-0.0803352158106098	-1.68876493058354	0.0916233752463484	442	-0.0630602539825785	-1.30938273133428	0.190809714456191	432	-0.0803551223653659	-1.6891852070288	0.091542753104329	442	-0.0625174845774335	-1.29808307688082	0.194663680189576	432	-0.0953853973439905	-3.07357693486628	0.00213705127645765	1034	-0.130601162439651	-3.22011904154705	0.00130821381599698	603	-0.0739370162291297	-2.37955108805601	0.0174120855691946	1034	-0.10632838947376	-2.61656313106596	0.00897514537097966	603
cg00701951	`HTRA1	NM_002775	Body			rs114201595;rs554981269;rs149924569;rs543730382	39;7;5;1	0.009185;0.000200;0.000399;0.000200		-0.0910492384866541	-1.91516891626939	0.0557794699239225	442	-0.119078610143347	-2.4810380948385	0.0132622159863727	432	-0.10029547122333	-2.11091265801115	0.0350363335097503	442	-0.0945462607587011	-1.96642631610795	0.0495516137258762	432	-0.0993419270459405	-2.0907096467999	0.0368161411808112	442	-0.0971563515751155	-2.02105221739899	0.0435618031491637	432	-0.0489177675763584	-1.57272667289118	0.115943146772779	1034	-0.081144239987183	-1.99365887954214	0.0464003012818755	603	-0.0480610756470874	-1.54514079071209	0.122474768499232	1034	-0.0962735525255476	-2.36750781049996	0.0180452381302486	603
cg00705851	`CEMP1	NM_001048212	TSS200	chr16:2581726-2582648	N_Shore	rs565407794	12	0.000399		-0.0522801170096646	-1.09763774103082	0.272744467562941	442	-0.0715612963567107	-1.48646750901402	0.137552173063486	432	-0.0341656557499158	-0.71694388893163	0.473703065721405	442	-0.0573814309560165	-1.19119521552387	0.233977255714884	432	-0.0283586358841564	-0.595015305163342	0.552085821666598	442	-0.0580081321058538	-1.20423417020558	0.228900309544765	432	-0.102433013218369	-3.30221766398902	0.000971965237595041	1034	-0.171399767859479	-4.2438056414451	2.32114621014575e-05	603	-0.0785087150442485	-2.52727432496114	0.0115579441496432	1034	-0.14836608958014	-3.6642857588872	0.00025620177899105	603
cg00741986	`TNIP2;TNIP2	NM_024309;NM_001161527	Body;Body							0.0921573910320615	1.93861042425907	0.0528513406404187	442	0.134186368826891	2.79943138471906	0.00521289584557049	432	0.0050489788536493	0.105909173876915	0.91570232488077	442	0.0689999078543211	1.43308974463253	0.152233223105889	432	0.00570399819226704	0.11964937311238	0.90481500350797	442	0.0707915479304902	1.4704243893316	0.14184499140483	432	0.112607367342214	3.63289209386735	0.000285455581234643	1034	0.155566790186973	3.84498703775501	0.000125280583948569	603	0.0769406725442718	2.47659517109095	0.0133321659952282	1034	0.099397228115218	2.44482579363756	0.0146146856104105	603
cg00744494	`PAPLN	NM_173462	Body	chr14:73706299-73706677	S_Shore	rs541640505	1	0.02496		-0.0155580334912909	-0.326374398651989	0.744286330160503	442	-0.0883981495565387	-1.8378602164039	0.0664179529139872	432	-0.0123981169449187	-0.260078421433655	0.794919803271092	442	-0.0960809698286224	-1.99854249262104	0.0459514602635285	432	-0.0113091879135241	-0.237233641212925	0.812582034591451	442	-0.100952403382263	-2.10054892571201	0.0359459702322275	432	-0.0278549457685741	-0.895064899666884	0.370899232290709	1034	-0.155315656366046	-3.83867797706103	0.00012851461283101	603	-0.0074194685002221	-0.238352994940857	0.811652943977558	1034	-0.118286283665988	-2.91346300899033	0.00362777117164314	603
cg00751072	`SSBP4;SSBP4	NM_032627;NM_001009998	TSS1500;TSS1500	chr19:18527651-18531118	Island					-0.0955451650467151	-2.01030452865384	0.0446827453412285	442	-0.074046406015615	-1.53827446456905	0.124372513207642	432	-0.0965158244659941	-2.03085476539986	0.0425480050142987	442	-0.0898825642201056	-1.86888824874408	0.061965748445007	432	-0.0958646019278647	-2.01706703391902	0.043970490181976	442	-0.0947540011589977	-1.97077305364003	0.049050906474306	432	-0.072518083467493	-2.3337224646677	0.0196937176947081	1034	-0.0531173946027491	-1.30341570303647	0.192722615967975	603	-0.0649621476315515	-2.08983626920438	0.0367442753611173	1034	-0.0336448544785695	-0.825125180961164	0.409539539218472	603
cg00753089	`SIDT2	NM_001040455	Body	chr11:117049399-117050234	Island					-0.0712134203677202	-1.49631818935145	0.134957460600193	442	-0.13937797754846	-2.90913971262882	0.0036995611913333	432	-0.0493687390454516	-1.03640995909006	0.300383765905606	442	-0.129102802227997	-2.69215695911104	0.00721337688504569	432	-0.0471634679706848	-0.990043768352734	0.322517405611359	442	-0.135100069256686	-2.81872810790413	0.00491163770582924	432	-0.0677279816587527	-2.17908089778942	0.0294269763266598	1034	-0.107261724673569	-2.63970809912659	0.00838727718705832	603	-0.0370066879539544	-1.18937399646035	0.234459282082336	1034	-0.0696694539325541	-1.71073912997905	0.0873889552365569	603
cg00753676	`FLJ13197	NR_026804	Body	chr4:38664649-38666531	N_Shore	rs560947252	6	0.000399		-0.0614963014186868	-1.29158711899871	0.196895776396353	442	-0.099365790367644	-2.06731481125499	0.0389791643757921	432	-0.0494506458034484	-1.03813225441133	0.299581606718974	442	-0.104775767851626	-2.18067986770128	0.0294499871979468	432	-0.05151079426017	-1.08145671234041	0.279873618402263	442	-0.106660807947703	-2.22021071416587	0.0266362678257902	432	-0.0281073675037089	-0.903180240430975	0.366577898377024	1034	-0.0638592365436266	-1.56766172574362	0.117237107286508	603	-0.0400351905014613	-1.28680855872487	0.198329676865945	1034	-0.0596368585444154	-1.46375251269269	0.143546855528185	603
cg00759807	`ANKRD11	NM_013275	5'UTR			rs115071747;rs574436595	14;26	0.000599;0.000200		0.0332571108202534	0.697864405369841	0.485550171489289	442	0.0505496353898064	1.04911374750696	0.294509351524844	432	0.012247471076285	0.25691796710946	0.797357237781148	442	0.0516570671709991	1.07213807330408	0.284045121897453	432	0.0120391615825163	0.252547785861698	0.800730905795314	442	0.0562984997221004	1.16866628722346	0.242936561713703	432	0.073436849669266	2.3633956383318	0.0181884612460546	1034	0.124791737923956	3.0753379588762	0.00214027540041121	603	0.0481206488882813	1.54705900290718	0.122011473417204	1034	0.0851753634598349	2.09317140887331	0.0365251596126566	603
cg00760203	`PLXDC1	NM_020405	Body			rs544555830	20	0.000399		-0.051868018264636	-1.08896998026398	0.276547753077513	442	-0.102324674384661	-2.12930197789171	0.0334866085183549	432	-0.0417179670344244	-0.87559165165409	0.381591668053176	442	-0.113468368707373	-2.36310695310263	0.0183150508524952	432	-0.0399822886828859	-0.839122889559226	0.4017305713913	442	-0.117806857028474	-2.45429123396323	0.01428514432905	432	-0.0568339603770616	-1.82774678793498	0.0677280973482918	1034	-0.155763578448923	-3.84993116569102	0.000122800041631791	603	-0.0209135913744851	-0.671942012610564	0.501739826224573	1034	-0.114576861987108	-2.82127558580917	0.00484744723750801	603
cg00762678	`CBFA2T3;CBFA2T3	NM_175931;NM_005187	5'UTR;Body	chr16:89006334-89008600	N_Shelf					-0.0560370147249061	-1.17667501459524	0.239715317798762	442	-0.0769517761837568	-1.59886693015655	0.110232833967479	432	-0.040945873086954	-0.859368356865623	0.390472829522118	442	-0.0748876805257281	-1.55581678329886	0.120140428856985	432	-0.0402836276884158	-0.845454027187665	0.398189284168228	442	-0.0806292395890288	-1.67560088312046	0.0941861023186755	432	-0.062640681774075	-2.01495489525763	0.0440297853079093	1034	-0.0838365855186677	-2.0601147932554	0.0395854659545587	603	-0.033337364419886	-1.07135173523346	0.28417257264695	1034	-0.0641188743517738	-1.57405299457155	0.115751572364997	603
cg00767069	`					rs553082981	1	0.000399		-0.0191143739347064	-0.4009953307479	0.688600247540076	442	-0.0189815279234665	-0.393656623075602	0.69401224525796	432	-0.0455483386260786	-0.956091563089609	0.339383934524396	442	-0.0578294091035172	-1.20051561693985	0.230340123908226	432	-0.046043499046802	-0.966499965103983	0.334154148517581	442	-0.0608462584361199	-1.26329543086154	0.206887178227725	432	-0.00702143387330811	-0.225565562509346	0.821582546810736	1034	-0.083464589645338	-2.05093093891963	0.0404733931891399	603	-0.0180969634961828	-0.581424028970053	0.561060292456812	1034	-0.0966193561582198	-2.37606488808813	0.0176336544521895	603
cg00791854	`IL6R;IL6R	NM_181359;NM_000565	Body;Body							-0.0782378571202203	-1.64449203174514	0.100441343171203	442	-0.127282110558884	-2.65377148148454	0.00808200538055676	432	-0.0688049731441347	-1.44554931630864	0.148694709159885	442	-0.103740320880055	-2.1589724260331	0.0311012912948812	432	-0.0655038518614149	-1.37599065805985	0.169219294839796	442	-0.109142215752418	-2.27227245062123	0.0232873779746185	432	-0.0665622579963309	-2.14146270390101	0.0323424701381875	1034	-0.0803944981674266	-1.97515803823948	0.0484647403698256	603	-0.0565203439612507	-1.81763946902575	0.069260782848536	1034	-0.060565388100409	-1.48659821823172	0.137404758693534	603
cg00794673	`ANKS1A	NM_015245	Body			rs566639476;rs533720903;rs114825291	32;29;14	0.000599;0.000200;0.024561		-0.115226044861874	-2.42778481626518	0.0153630024108681	442	-0.0950716454877987	-1.97741974302265	0.0482934890130093	432	-0.0938127167468615	-1.97363567368225	0.0487166547894125	442	-0.0673283147944003	-1.39826503727618	0.162436523442263	432	-0.0896858929065317	-1.8863356726767	0.0595654191926642	442	-0.0692443591992308	-1.43818313117124	0.150782782262336	432	-0.119311462102441	-3.85119580953356	0.000120224618003731	1034	-0.14166646213161	-3.49651348769847	0.000484533750021474	603	-0.0780116118427433	-2.51120659589712	0.0120963177595673	1034	-0.0900400500622529	-2.21335332064752	0.0270404535013169	603
cg00802478	`RBM47	NM_001098634	5'UTR			rs190655423	27	0.0002		0.003467963838822	0.0727449148156111	0.94204204627309	442	-0.0527751285759933	-1.09538607667297	0.273737872329531	432	-0.0326622077884322	-0.685372042785819	0.493393238677455	442	-0.109471097781213	-2.27917476202725	0.0228720911537487	432	-0.031505152207015	-0.661076428436946	0.508839181202856	442	-0.112950801337714	-2.35223510943254	0.0188564962467563	432	-0.020407842739231	-0.655688022086393	0.512141733524769	1034	-0.0958488533281933	-2.35699921075151	0.0185621896260907	603	-0.0430643361438858	-1.3842874868253	0.166438638199994	1034	-0.117616327472052	-2.89680710491023	0.00382499374908175	603
cg00808648	`PACS2;PACS2	NM_015197;NM_001100913	TSS1500;TSS1500	chr14:105780339-105782027	N_Shore					-0.050457378636618	-1.05930249055861	0.289838466672628	442	-0.0801766369778391	-1.66615444771855	0.0960540926991385	432	-0.0255961788783098	-0.537027278615618	0.59147973274183	442	-0.0817368246363259	-1.69872063290503	0.0897371560982466	432	-0.0249890273528433	-0.524283407926263	0.600307512172074	442	-0.0853059098172502	-1.77325074836282	0.0765370034067278	432	-0.0453779741869469	-1.45875820806347	0.144797977200122	1034	-0.156756969086956	-3.87489396221483	0.000110967768230962	603	-0.00616679537499609	-0.198109313058297	0.842997572735422	1034	-0.102031552629032	-2.51006887815782	0.0121816135194433	603
cg00813162	`ACTN1;ACTN1;ACTN1	NM_001130004;NM_001102;NM_001130005	Body;Body;Body	chr14:69444639-69446826	N_Shore					-0.0652900507729394	-1.37148666607722	0.170618214266322	442	-0.0735066004824569	-1.52701955836505	0.127148490488119	432	-0.0517287531479165	-1.08604087151416	0.277841146620782	442	-0.095217948415467	-1.98048125958556	0.0479479392700566	432	-0.0516431738264626	-1.08424093610449	0.278637978394061	442	-0.0989363852805734	-2.05832207062898	0.0398363898575132	432	-0.0444917807889329	-1.4302318600029	0.152817667355178	1034	-0.0909555087775622	-2.23598138899619	0.0255156217928804	603	-0.0311197023823425	-1.00003577790277	0.317449491962466	1034	-0.0772478231400531	-1.89753402550513	0.0579865523892419	603
cg00833777	`ITGAM;ITGAM	NM_001145808;NM_000632	Body;Body			rs567965346	1	0.0002		-0.01577039724762	-0.330830071680109	0.740919975876323	442	-0.0503961946285051	-1.04592380572769	0.295979282364508	432	-0.0192976750718684	-0.404841706667373	0.68577214880754	442	-0.0813920831629189	-1.69152404430872	0.091103469001013	432	-0.0209212336367097	-0.43891154343644	0.660917887400097	442	-0.082188308505429	-1.70814612097423	0.0879727079814422	432	-0.0498737544918021	-1.60351263837523	0.108980660319913	1034	-0.125065356729171	-3.08215215653475	0.00209215806330319	603	-0.0455829031115641	-1.46535514552229	0.142990127934196	1034	-0.101751756152433	-2.50313762351523	0.0124218269772416	603
cg00834988	`AUTS2;AUTS2	NM_015570;NM_001127231	Body;Body	chr7:70060834-70061456	N_Shore	rs141998029;rs577796314	26;3	0.001198;0.000200		-0.0295586242914333	-0.620207603699983	0.535382758841519	442	-0.0646156235652446	-1.34176754536708	0.180076179935439	432	-0.0226169006734477	-0.474497027499126	0.635352091256676	442	-0.0922779168163313	-1.91897486113945	0.0553022159787368	432	-0.0212236215541587	-0.445257303770025	0.656328649584053	442	-0.0973059343293001	-2.02418363551322	0.0432378453179201	432	-0.0545341020020944	-1.75363456325709	0.0796406644111212	1034	-0.0981581405938658	-2.41414987973959	0.0159000907718925	603	-0.0552629104464009	-1.77711813420843	0.0756941890022866	1034	-0.0976326518033529	-2.40114270904405	0.0164745041578809	603
cg00850552	`SUMO3	NM_006936	Body	chr21:46236726-46238958	N_Shore					-0.0154041337219258	-0.323145395973242	0.746728974040482	442	-0.0792474056009008	-1.64676227635617	0.09998179016268	432	-0.0160702847809106	-0.337122160470308	0.736174629485712	442	-0.0882800280260677	-1.83539153109868	0.0667832358052234	432	-0.015905558076156	-0.333665940496014	0.738779995930596	442	-0.088327645083229	-1.83638669930342	0.0666357854272818	432	-0.0398606134829858	-1.28119135031057	0.200295072402658	1034	-0.144463417280908	-3.56651448630588	0.000372587353527901	603	-0.0284397009041398	-0.913864911446187	0.360936544773511	1034	-0.147757678807651	-3.64903607650523	0.000271770822604125	603
cg00851028	`					rs546707578;rs564863255	26;47	0.000200;0.000599		-0.11550549879338	-2.43372576101237	0.01511446985914	442	-0.149028648624666	-3.11351184417208	0.00189707804192372	432	-0.0422816559612235	-0.88743658492553	0.375186404323969	442	-0.0968050745690456	-2.0136988216964	0.0443306190108835	432	-0.0419848257859325	-0.881199149837369	0.378551027227552	442	-0.101385683807715	-2.10962653087269	0.0351533828786034	432	-0.104633447012308	-3.3736720231191	0.000752327470017527	1034	-0.162943596366682	-4.03053859193622	5.82362576704426e-05	603	-0.0310035174120171	-0.996299759383185	0.319260525262116	1034	-0.0764466842995644	-1.87777719033204	0.0606442750585742	603
cg00852964	`VNN1	NM_004666	1stExon			rs202005795;rs376438768	1;36	0.001000;0.000200		-0.0367694124313286	-0.771629572537164	0.440645063353944	442	-0.0796436281952671	-1.65503071002256	0.0982916951291567	432	-0.0469895224930771	-0.986386953002122	0.324307250238573	442	-0.110971244639818	-2.3106650417467	0.0210581343623837	432	-0.0452560680585825	-0.949948180176303	0.342495259230852	442	-0.113773051216466	-2.36950761453549	0.0180026954037655	432	-0.026037585875696	-0.836640216712812	0.402935362965313	1034	-0.136588787284195	-3.3695753875955	0.00077129403168457	603	-0.0296230334324831	-0.95191125182454	0.341294261470481	1034	-0.122326590560112	-3.01396715549007	0.00262166581604529	603
cg00853671	`			chr12:129329287-129331491	Island	rs572292046;rs541011369;rs557287327;rs577229882;rs543081179;rs563067267	0;1;7;25;26;28	0.000200;0.000200;0.003594;0.001997;0.000399;0.000200		-0.0922127559194242	-1.93978172172291	0.0527084700228539	442	-0.0700972437225621	-1.45595518809879	0.145804359551714	432	-0.0664575896160947	-1.39608390659195	0.163083201353982	442	-0.0658096736356851	-1.36663364543419	0.172144415373658	432	-0.0695722018029173	-1.46172025248719	0.144207703183876	442	-0.068721359255525	-1.4272861183525	0.153898851873312	432	-0.00705287134366634	-0.226575533614662	0.820797228109368	1034	-0.0760716229853795	-1.86852866466393	0.0619226876632062	603	-0.00587408857741606	-0.188705837466964	0.850359627586496	1034	-0.0748546031053771	-1.83852217437216	0.0662250029630576	603
cg00864768	`MBOAT7;MBOAT7;MBOAT7;MBOAT7	NM_001146083;NM_001146082;NM_001146056;NM_024298	Body;Body;Body;Body	chr19:54693034-54695497	N_Shore	rs554338927;rs147027111	47;9	0.000200;0.000233		-0.0341876581521042	-0.717405954926929	0.473418140050348	442	-0.0880495512579335	-1.83057482267123	0.067500715803701	432	-0.0499830963192671	-1.04932870594496	0.294401758308401	442	-0.101947323881649	-2.12139458315612	0.0341481552428973	432	-0.0481084596270306	-1.00991116485618	0.312906174766621	442	-0.107439841798479	-2.23655237651508	0.0255428474222672	432	-0.0147889634302224	-0.47512649451489	0.634785010580856	1034	-0.0330547947244276	-0.810643581263611	0.41780646939942	603	-0.027326923376151	-0.878089385551	0.380040290513028	1034	-0.0445946928849969	-1.09397791249746	0.274243829022145	603
cg00867472	`HDGF;HDGF;HDGF	NM_001126050;NM_001126051;NM_004494	Body;Body;Body	chr1:156710798-156711146	S_Shelf	rs574319981	1	0.0002		-0.170760096679835	-3.61733091526481	0.000310496894612039	442	-0.105620514703628	-2.19839293667244	0.0281590282353916	432	-0.153499013262043	-3.24547453076532	0.00120709382688081	442	-0.122506744356632	-2.55317805863463	0.0108192465338535	432	-0.153667799591512	-3.24910055280073	0.00119194345878957	442	-0.12507980117405	-2.60736452759598	0.00925657154575263	432	-0.0644568127839723	-2.07353424803876	0.0382362495711005	1034	-0.140903019766095	-3.47741626006576	0.000520128056184752	603	-0.0451506493269997	-1.4514404591616	0.146823800957558	1034	-0.111507353884895	-2.74505157687535	0.00612427623153976	603
cg00869530	`PBX2	NM_002586	Body			rs146965329	1	0.00022		-0.0991301991224696	-2.08622423295011	0.0372215823734542	442	-0.0545242348580083	-1.13176102347706	0.258129686236699	432	-0.0805614436044336	-1.69354123677901	0.0907104882492939	442	-0.0425917872668079	-0.883736741470747	0.377187893490695	432	-0.0804994339951256	-1.69223202178261	0.0909599844922764	442	-0.0434854374236405	-0.902302256097036	0.367250433613655	432	-0.115724995144819	-3.73436784184961	0.000192033133658453	1034	-0.125987607305412	-3.10512336402484	0.00193717347789227	603	-0.0886820460349829	-2.85639297030476	0.0043196527844427	1034	-0.0726656995515197	-1.7845669756295	0.0745800590362164	603
cg00870662	`PARD6G	NM_032510	TSS1500	chr18:78004028-78005438	S_Shore	rs529476067;rs113405548	37;46	0.000200;0.500000		-0.0147715133689592	-0.309872417562782	0.756796118415551	442	0.102557356798441	2.13417815452792	0.0330841546590948	432	0.0179284960418999	0.376111607090223	0.707000233619226	442	0.103408841899503	2.15202419300955	0.031646387456849	432	0.0189814404817726	0.398205883035548	0.690653958381941	442	0.104802378175716	2.181237797615	0.0294085598289203	432	0.0903731120202458	2.911157011353	0.0036320864686375	1034	0.0797333093989702	1.95884422042267	0.050348674584731	603	0.123455519150174	3.98631365921042	6.88419260104469e-05	1034	0.121233940507936	2.98677726954536	0.00286506739657876	603
cg00874032	`					rs113196522;rs558801707	0;14	0.004992;0.000399		0.0243297580933757	0.51044604446859	0.609959727868935	442	-0.0879669076657273	-1.828847711416	0.0677595218653667	432	0.013031815721689	0.273373148925367	0.784688716681973	442	-0.0884350701155424	-1.83863184965101	0.0663041155577255	432	0.0146296925316417	0.306896915548142	0.759058694587081	442	-0.093133487318016	-1.93687014811014	0.0530712618848966	432	-0.0526564698325721	-1.69314230719502	0.0905810335534516	1034	-0.100567803635989	-2.47381257518168	0.0134852234626549	603	-0.0505621508754873	-1.62568311613238	0.1041747518153	1034	-0.101535929295768	-2.49779132796816	0.0126099699427631	603
cg00874051	`			chr21:35574323-35574549	N_Shelf	rs5843644	12	0		-0.0825516091913592	-1.7355668485291	0.0829902288295061	442	-0.104618220963799	-2.17737669833331	0.0296962848798903	432	-0.0735087916133595	-1.54471976140238	0.122795385791761	442	-0.112802928791584	-2.34912918589442	0.0190137309001891	432	-0.0704585930443488	-1.48040494856642	0.139153423493973	442	-0.11712582429467	-2.43997144875247	0.0148609471468609	432	-0.0259892040675675	-0.835084910421769	0.403810254958858	1034	-0.103972798653306	-2.55816944565814	0.0106251321407109	603	-0.00944668510277558	-0.303481489335697	0.761580683594295	1034	-0.0945618727112724	-2.32515989504353	0.020208457568784	603
cg00879667	`CAPS;CAPS	NM_080590;NM_004058	Body;Body	chr19:5915007-5915301	Island	rs77750510;rs201449236;rs150364306;rs138114340;rs149083888	22;27;39;46;49	0.014976;0.000399;0.000220;0.000220;0.000220		-0.0859758503684592	-1.80790805994597	0.0709550388845235	442	-0.12234282309453	-2.5497271940242	0.0109262899773659	432	-0.0869048072472682	-1.82754071914559	0.0679482450604449	442	-0.124358701506776	-2.59217521786874	0.00967288713485317	432	-0.0868216301313071	-1.82578271672801	0.0682131396761277	442	-0.123772881822147	-2.57983749578537	0.0100232594873808	432	-0.01443520490342	-0.463759660787002	0.642906207247347	1034	-0.0948020782391279	-2.33110187389109	0.0198918814487265	603	-0.0215057282799134	-0.690972828257933	0.489704536233084	1034	-0.117471398508333	-2.89320435000617	0.00386891618186341	603
cg00888561	`WDFY2	NM_052950	TSS1500	chr13:52158056-52159235	N_Shore	rs574827438;rs543686902	46;38	0.000399;0.000200		-0.0706295740174857	-1.48400941322731	0.138194306090306	442	-0.0579425104661852	-1.20286882179833	0.229428221953886	432	-0.0698215840351292	-1.4669768732092	0.14277173183635	442	-0.0732422367390256	-1.52150792149079	0.128525405143679	432	-0.0669922899480388	-1.40735003490505	0.159717045692369	442	-0.0752090476441389	-1.56251853977617	0.118553752858783	432	-0.0667428350179374	-2.14728958309325	0.031875278659136	1034	-0.0332033132318295	-0.814288557720882	0.41571649412394	603	-0.04623248922004	-1.4862670141343	0.137373798141881	1034	-0.0157982813701978	-0.387331854820143	0.698635748407368	603
cg00898147	`SALL2	NM_005407	Body			rs564625377	22	0.000399		-0.00180437175370671	-0.037848862289124	0.969825335336577	442	-0.0774438571210854	-1.60913211325506	0.107968534160058	432	0.0206008532316545	0.432188289443638	0.665794087035516	442	-0.0705413263364856	-1.46520964277815	0.143262320279098	432	0.0207178672201236	0.434643843628796	0.664011484002301	442	-0.076276013779852	-1.58477128509873	0.113403063897706	432	-0.0768037620222466	-2.47217080880806	0.0134979338894704	1034	-0.146361457376261	-3.61405066868351	0.000310905707350851	603	-0.0379646663237729	-1.22019212588417	0.222559663441856	1034	-0.091396207547938	-2.24687581812993	0.0248084240939535	603
cg00908571	`CKAP2L	NM_152515	Body	chr2:113521918-113522574	N_Shore	rs146369401;rs11397391	4;20	0.000200;0.010184		0.0441248003166508	0.926171016691564	0.354708637479184	442	0.159151551500697	3.32853223306667	0.000901787229525935	432	-0.00460586324780384	-0.0966140857486738	0.923076588629355	442	0.109014413809819	2.26959038166216	0.0234505076359137	432	-0.00407108561138044	-0.0853962839981122	0.931985003008089	442	0.110019984137767	2.29069546842576	0.0221932732040545	432	0.0791986650899372	2.54957748219608	0.0108459238412051	1034	0.166875599882554	4.12962773150162	3.81818228878571e-05	603	0.0432402471529219	1.38994912788182	0.164712422388068	1034	0.112307142751482	2.76490730090669	0.00576533715544716	603
cg00911370	`SIRPB2;SIRPB2;SIRPB2;SIRPB2	NM_001134836;NM_001122962;NM_001122962;NM_001134836	1stExon;1stExon;5'UTR;5'UTR			rs555173766;rs10211750	1;19	0.000399;0.014377		-0.0465098199182078	-0.976302587004644	0.329276572111685	442	-0.0661234209102795	-1.37316808260926	0.170104144554373	432	-0.0451856923827795	-0.948468942611798	0.343247139993213	442	-0.0838725910534988	-1.74331460931307	0.0816349672720607	432	-0.044203671537386	-0.927828666588422	0.353848345334514	442	-0.0866884236563229	-1.80213276758388	0.0718678534917527	432	-0.0378013427755698	-1.21493785608695	0.224557276778806	1034	-0.0905783399231308	-2.2266581701651	0.0261346221025815	603	-0.0206029472033985	-0.661958342059046	0.508115690245898	1034	-0.0605679970872359	-1.48666241382022	0.13738779001989	603
cg00916640	`			chr12:34493973-34496968	S_Shore	rs11836224;rs558621001	42;50	0.232029;0.001997		-0.132668414126817	-2.79937780155531	0.00521161809982731	442	-0.0674494347273607	-1.40078809151227	0.161680359477694	432	-0.11102823576367	-2.33858918865761	0.0195513616255968	442	-0.0402565171308916	-0.83522828847284	0.403926017100101	432	-0.111022669096958	-2.33847096395693	0.0195575181448105	442	-0.0380680615273765	-0.789777782189475	0.429981438661508	432	-0.052300674707034	-1.68168091049847	0.0927842896230475	1034	0.0107692853296753	0.264022482324747	0.791849170335751	603	-0.0556294019476596	-1.78892789114766	0.0737707109470085	1034	0.00939395233353366	0.230302346876077	0.81793257393522	603
cg00916854	`VPS37B	NM_024667	3'UTR	chr12:123351641-123351918	N_Shore	rs566738683;rs566440615;rs533794702;rs183331099	0;20;23;40	0.000399;0.000399;0.000200;0.000200		0.00623590889844459	0.130807224146664	0.89598692199231	442	-0.129489814495689	-2.70031865993392	0.00703987313823596	432	-0.00355083962616589	-0.0744833534083501	0.940659512095296	442	-0.145072495528676	-3.02966203095842	0.00250659825855331	432	-0.00266516598771799	-0.0559051257622122	0.955442711247111	442	-0.146100371218355	-3.05143806904562	0.00233306824702748	432	-0.0503532002898224	-1.61895349589968	0.10561539376784	1034	-0.0497961175875625	-1.22177735849436	0.222079694727508	603	-0.0587110506259581	-1.88824981236047	0.0591267778612232	1034	-0.0464762770675651	-1.14020137292722	0.254485533997494	603
cg00928816	`ARID5B	NM_032199	Body			rs572379672;rs530205912;rs368148679	10;12;24	0.000200;0.000599;0.001997		0.0594763525293541	1.24906071203517	0.212037335181735	442	0.0537303589596859	1.11525048962017	0.265135951434335	432	0.034731327555413	0.728823618803767	0.4664076769069	442	0.04549025567451	0.943957509007044	0.345555031031684	432	0.0372294934768048	0.781293543721323	0.434943923533352	442	0.0476622135274947	0.989094120456413	0.322990068302538	432	0.0509557201988839	1.63835909437084	0.10150359334676	1034	0.149232801894978	3.68601457770156	0.000235458743622451	603	0.0347659875247912	1.11729918973838	0.264030236003229	1034	0.11798038546416	2.90585768636537	0.00371664819244949	603
cg00960906	`					rs543563120	23	0.0002		-0.0677088259231624	-1.42244871004254	0.155288616314873	442	-0.134814065876805	-2.81268739353817	0.0050042046488108	432	-0.0672739774823475	-1.41328551286727	0.157964902496263	442	-0.118659297507378	-2.47221842236064	0.0135921205767386	432	-0.0678974533677616	-1.42642366664444	0.154138429350598	442	-0.122276283724003	-2.54832644965598	0.0109700082808748	432	-0.0714467801875662	-2.29912785299484	0.0215850666723959	1034	-0.0756087011660846	-1.85711434446652	0.0635311680697205	603	-0.0961266299413715	-3.09760921001399	0.00197168172033065	1034	-0.109414064073015	-2.69310003615997	0.00716060593398294	603
cg00968616	`CUEDC1	NM_017949	3'UTR	chr17:55939088-55939591	S_Shelf	rs552032908	14	0.0002		-0.0441541216765109	-0.926787267361102	0.354388659574366	442	-0.0608611634031313	-1.26360565565227	0.206775762986697	432	-0.0788025986882399	-1.65641164060783	0.0980031850903391	442	-0.0829302996322411	-1.72363797023424	0.0851335859895866	432	-0.0783410841279903	-1.64667069327152	0.0999921179724881	442	-0.0847650094460699	-1.76195270275447	0.0784295977062562	432	-0.000607721122727232	-0.0195228956783831	0.984427745217376	1034	-0.0865548523720837	-2.12724119108274	0.0335845159235753	603	-0.0209915640862818	-0.674447967156386	0.500146128690051	1034	-0.102419466943026	-2.51967914237494	0.0118553728867228	603
cg00974523	`PRDM7;PRDM7	NM_052996;NM_001098173	3'UTR;3'UTR			rs545070169;rs556564774	2;1	0.000200;0.000399		0.0698689807095292	1.46797594808948	0.142500057540233	442	0.10982868152885	2.28668001289181	0.0224278517601753	432	0.0222223089257261	0.466215838617108	0.641264282115711	442	0.0667752885019814	1.38674544826941	0.165922937775371	432	0.0211703391854078	0.444139140969873	0.657136366653842	442	0.0715708400208803	1.48666642945762	0.137499582501391	432	0.123688181188071	3.99390377166633	6.66853881853874e-05	1034	0.176747729312214	4.37900980242177	1.26752300251013e-05	603	0.0711724244499451	2.29026919478501	0.0220941166146343	1034	0.0947021057621966	2.32862881547393	0.020023110505361	603
cg00980058	`PCNXL2	NM_014801	Body							-0.0428348493276562	-0.89906152231661	0.368965187745108	442	-0.0909401800511728	-1.89100018729499	0.0589461721057474	432	-0.0455524330585152	-0.956177627198018	0.339340476546431	442	-0.11866972731823	-2.47243778847442	0.0135838278445374	432	-0.0450394995353935	-0.945396121929041	0.344812393727487	442	-0.122796504768605	-2.55927842890765	0.010632298563554	432	-0.0180550909836767	-0.580078445028829	0.56196709333693	1034	-0.114252419358656	-2.81321627482641	0.00497001466340952	603	-0.0146192022306042	-0.46967177788397	0.638676802335737	1034	-0.101938458036754	-2.50776264922104	0.0122610781769804	603
cg00984618	`NOC3L;NOC3L	NM_022451;NM_022451	1stExon;5'UTR	chr10:96122540-96122904	Island	rs376880215;rs76288667	40;3	0.000599;0.037340		-0.0449479497626351	-0.943471862154013	0.345794903121133	442	-0.0539203238175803	-1.11920113043479	0.263447671604815	432	-0.0471929543618209	-0.99066365985561	0.322214637629255	442	-0.0501400542657094	-1.0405989106931	0.298443939354817	432	-0.0460293429798124	-0.96620239428036	0.334302939198293	442	-0.0511369014364274	-1.06132311748069	0.288928570169841	432	-0.0136678125119422	-0.439102497192033	0.660669285515053	1034	-0.0835386578635881	-2.05275949324467	0.0402952669058894	603	-0.0175330590246864	-0.563302983319162	0.573331306294251	1034	-0.0818415448050495	-2.01086780403929	0.0445470284680547	603
cg00987379	`ZNF395	NM_018660	TSS1500	chr8:28243684-28244283	S_Shore	rs78714540;rs141402671	21;30	0.001797;0.000599		-0.0675258806111076	-1.41859359077558	0.156410347408055	442	-0.157795436443286	-3.29968680821035	0.000998837982470056	432	-0.0451408110872171	-0.947525580419498	0.343727191898939	442	-0.115750800133939	-2.41106644549802	0.0160859249577621	432	-0.0417262247408275	-0.875765168812005	0.381497354780777	442	-0.119978962300302	-2.4999788042843	0.0125775819875991	432	-0.0296629125514076	-0.953193485528147	0.340644429535819	1034	-0.10298326213979	-2.53364809036652	0.0113949943970444	603	-0.000213886903491739	-0.00687106486395764	0.994519054475622	1034	-0.0600448448729413	-1.47379036544537	0.140822694066138	603
cg00988037	`SSBP3;SSBP3;SSBP3	NM_001009955;NM_018070;NM_145716	Body;Body;Body	chr1:54870853-54872476	N_Shore	rs571991928	50	0.0002		-0.128930272002093	-2.7196009110768	0.00664229765829075	442	-0.0858535549146933	-1.78469074438196	0.0746587855265295	432	-0.133352207396578	-2.81397950029625	0.00498219488625084	442	-0.102722729623455	-2.13764391008365	0.032800635662005	432	-0.132327653792906	-2.79210222435191	0.00532946291908865	442	-0.106071026846241	-2.20784080300147	0.0274906356778133	432	-0.0972723532019301	-3.13476270998491	0.00173902467806198	1034	-0.102677942527996	-2.52608309474767	0.0116423053078981	603	-0.0715789036921415	-2.30339410644376	0.0213435782646257	1034	-0.068091610160558	-1.67187340671693	0.094814283480324	603
cg00995986	`MEIS1	NM_002398	Body	chr2:66661118-66661657	S_Shelf	rs543080703	4	0.0002		-0.0513108279431458	-1.07725106765403	0.281747145204313	442	-0.092032367378122	-1.91383942654916	0.0559567017163701	432	-0.037922265404432	-0.795845797863255	0.426439935890975	442	-0.0702607583807408	-1.45936268245007	0.144864388295855	432	-0.0360289607834192	-0.756077121568918	0.449909499575211	442	-0.0744753426259374	-1.54721840652855	0.122200463728791	432	-0.0428312236655772	-1.37678496662938	0.168747051820483	1034	-0.147678276124622	-3.64704607272386	0.000273866754043292	603	-0.0150384485178591	-0.483142925327688	0.629083809638856	1034	-0.122065053990784	-3.00745831887094	0.00267814511330879	603
cg01002030	`RAVER2	NM_018211	Body	chr1:65210282-65211238	S_Shore	rs181226800;rs539020227	30;20	0.000200;0.000200		-0.079814279432413	-1.67776715934615	0.0937534730305896	442	-0.105060894451074	-2.1866581872331	0.0290086911495462	432	-0.045158278261186	-0.947892723365789	0.343540311634312	442	-0.0971762863073912	-2.02146953280296	0.0435185119923559	432	-0.0439672647501492	-0.92286009940875	0.356430901057565	442	-0.100055348842938	-2.08175739172306	0.0376352768440491	432	-0.079533991004218	-2.56041803051398	0.0105141442754112	1034	-0.137565249984358	-3.3939720836066	0.000706182720610046	603	-0.048570640946955	-1.56154875552341	0.11855599412534	1034	-0.0956537719196402	-2.35217247821948	0.0188039473954586	603
cg01012082	`NCOA2	NM_006540	3'UTR			rs150911442;rs559655668;rs371386462	0;7;30	0.000799;0.002796;0.000399		-0.0998596271508066	-2.1016778238373	0.0358405499589346	442	-0.176453374835544	-3.6977161118731	0.000227941120565433	432	-0.0820343377083352	-1.7246424888912	0.0849438960102485	442	-0.158746515456909	-3.31991552746599	0.000929820389474021	432	-0.0804349920113256	-1.69087146576343	0.0912198498478966	442	-0.16165453767227	-3.38180597721928	0.000745166419558355	432	-0.0793595928674802	-2.55477994635004	0.0106855556478121	1034	-0.154911689036851	-3.82853044390146	0.000133881941622393	603	-0.0903985657967982	-2.91198144301143	0.00362254322500779	1034	-0.169277679981325	-4.1902274076207	2.93620761185984e-05	603
cg01014262	`			chr16:48530535-48530809	S_Shelf	rs568124734	2	0.0002		-0.0240010724855091	-0.503547448375897	0.614797462603714	442	-0.0727497507389021	-1.51124080677081	0.131121235829228	432	-0.0224804920043788	-0.471634239546428	0.637393316214114	442	-0.0870262806093196	-1.80919197461167	0.0707628899534858	432	-0.0207076849809266	-0.434430167506375	0.66416652621715	442	-0.091716511468612	-1.9072339426362	0.0568080221355921	432	-0.0504897575115737	-1.62335154471759	0.104672103923885	1034	-0.0845197031548429	-2.07698114291318	0.0379978390480257	603	-0.0449655356517883	-1.44548162954159	0.148489388035961	1034	-0.074887495826069	-1.83933309508925	0.066105574343776	603
cg01022200	`KIAA1614	NM_020950	TSS1500	chr1:180881316-180882592	N_Shore	rs572206399	51	0.001997		-0.0397518937448151	-0.834282391129821	0.404450797483936	442	-0.0899210026190626	-1.86969181907096	0.0618538120815313	432	-0.0303632641488322	-0.637101037184061	0.524326632171995	442	-0.0944300655654656	-1.96399513568468	0.0498335320032216	432	-0.0288607643232198	-0.605556668645204	0.545065581996327	442	-0.0970713356147641	-2.01927250427194	0.0437468347659004	432	-0.0381661506076003	-1.22667415182052	0.220112849145052	1034	-0.119797547093389	-2.95104466367505	0.0032163314576403	603	-0.0144762433414736	-0.465078286179914	0.641961880052049	1034	-0.089082643635816	-2.18969242210472	0.0287184566732678	603
cg01022780	`			chr3:48594022-48594853	S_Shelf	rs552259807;rs79895707;rs561370927	45;19;6	0.000399;0.014776;0.000399		-0.0187704028434656	-0.393777542352385	0.69391897439095	442	-0.0840287464535481	-1.74657569985101	0.0810665694180653	432	-0.0162553971853587	-0.341006125672316	0.733250441713477	442	-0.0925332434243194	-1.92431502494587	0.0546284256119116	432	-0.0160802873631159	-0.337332030638301	0.736016522654967	442	-0.0955894990348674	-1.98825666806838	0.0470796773259833	432	-0.0325859259005465	-1.04718569872619	0.295173659789209	1034	-0.118164474141071	-2.91043448131764	0.00366292863442288	603	-0.0224531236559915	-0.721422386632241	0.470775802187792	1034	-0.0948244135150357	-2.33165439684419	0.0198626655750111	603
cg01026503	`			chr20:62026262-62026480	N_Shore	rs191148929;rs6062920	5;2	0.000200;0.003395		-0.0667907917007979	-1.40310437488514	0.160979356932363	442	-0.0504248421028433	-1.04651936584877	0.295704474596817	432	-0.0852252085703621	-1.79204623726332	0.0734633365667277	442	-0.0466483186549996	-0.968022692242632	0.333401806196795	432	-0.0847989692471618	-1.78304027909342	0.0749195051996969	442	-0.0503627533625795	-1.04522858835274	0.296300291149516	432	-0.0588757285344936	-1.89355840013318	0.0584174465260613	1034	-0.0877350994010228	-2.15639672043199	0.031231303133085	603	-0.0548935375717638	-1.76521601390189	0.0776739441246367	1034	-0.0748209852406068	-1.83769338046443	0.066347247641967	603
cg01044025	`					rs113584602	26	0.005591		-0.0552737880716942	-1.16061569233364	0.246186901761805	442	-0.070547785316309	-1.46534424890648	0.143225599083934	432	-0.0293671608671426	-0.616187943703467	0.538030695673993	442	-0.0828923310578029	-1.72284518730024	0.0852770525274639	432	-0.0272531359844036	-0.571808198286288	0.567695974742498	442	-0.0854174912686002	-1.77558153413741	0.0761512379331878	432	-0.0636722282145259	-2.04822578564962	0.040654473826194	1034	-0.133403161302895	-3.29002908960789	0.00102436873406556	603	-0.0524226375332804	-1.68560970839047	0.0920242474194554	1034	-0.126767978201252	-3.12456490025905	0.00181432337753382	603
cg01044293	`ITGA6;ITGA6	NM_001079818;NM_000210	Body;Body	chr2:173292099-173293183	S_Shelf	rs148339452;rs564551323	9;46	0.000799;0.000399		-0.0795531169866312	-1.67225396364442	0.0948361593875403	442	-0.0805188519594956	-1.67329687850669	0.0946389985310526	432	-0.0545585255609029	-1.14556683457399	0.252361664743307	442	-0.0592453341616557	-1.22997782476342	0.219108168881276	432	-0.0522528628754471	-1.09706448748246	0.272994891010827	442	-0.0628597802038729	-1.30520907434003	0.192226618932332	432	-0.100612103925235	-3.24311218868515	0.00119705927563841	1034	-0.136808996115738	-3.37507667374557	0.000756142603800336	603	-0.0600133089085342	-1.93023249043909	0.0537079017750154	1034	-0.0816529522024148	-2.00621329526104	0.0450420108269611	603
cg01054110	`NCOR2;NCOR2	NM_006312;NM_001077261	5'UTR;5'UTR	chr12:125002006-125002433	Island	rs528955260	18	0.000399		-0.089061792972959	-1.873139030984	0.0613680991577116	442	-0.0923848851592092	-1.92121207636622	0.0550190980122176	432	-0.0689605250948008	-1.44882775721456	0.147776507931735	442	-0.0834848711835867	-1.73521798525024	0.0830601876356307	432	-0.0709863937003867	-1.49153184185261	0.136209088910467	442	-0.0829663514565823	-1.72439073612449	0.084997542076876	432	-0.108627164844451	-3.5034449385831	0.000466770332602397	1034	-0.0920439810118882	-2.26289090854084	0.0237996916076662	603	-0.0974385877960106	-3.14015405555154	0.00170744514186694	1034	-0.0727313853690386	-1.78618583906024	0.0743173899777848	603
cg01059609	`DIAPH1;DIAPH1	NM_001079812;NM_005219	Body;Body			rs534677480;rs554678494	37;29	0.000200;0.000200		-0.0360520848561503	-0.756562807076935	0.449618519795653	442	-0.081827031341505	-1.7006037940742	0.0893823670886039	432	-0.0674521092059287	-1.41703906824104	0.156864406394285	442	-0.109329240236545	-2.27619750841331	0.0230504250135838	432	-0.0652042519643979	-1.36967924052954	0.171182024706787	442	-0.114849385108724	-2.39212246089996	0.0169361793976955	432	0.00977749594068008	0.31410968911358	0.753497414810235	1034	-0.0597306519455464	-1.46606010618286	0.142917046849984	603	-0.0245202844972315	-0.787866101685702	0.430909768232256	1034	-0.0830227165830195	-2.04002269874516	0.0415499437141479	603
cg01065780	`MB	NM_203377	TSS200							-0.0889713888395939	-1.87122755140778	0.0616329218318947	442	-0.0270705478823964	-0.561484009931476	0.57471341643761	432	-0.0854519647082637	-1.7968376081546	0.0726981165182104	442	-0.0285072927593262	-0.591300015594336	0.554576487261582	432	-0.0840638733087028	-1.76751006620028	0.0774859612365621	442	-0.0314295220088562	-0.651951165491631	0.514711770195402	432	-0.0334123022779362	-1.07376178019989	0.283090877196627	1034	-0.0554289324037533	-1.36025118765796	0.174039815661674	603	-0.0132966806707467	-0.427177809350678	0.669329765031051	1034	-0.0306824466337706	-0.752425598806205	0.452018783246512	603
cg01068808	`GLT25D2	NM_015101	TSS1500	chr1:184005359-184006766	S_Shore	rs567910249	29	0.000599		-0.0470919745121819	-0.988540770723841	0.323252272208927	442	-0.0692853142633402	-1.4390364875339	0.150540807253908	432	-0.0641784938092194	-1.34807232966421	0.178030619449432	442	-0.115611102392854	-2.40813032000424	0.0162151948918783	432	-0.063521065215469	-1.33422554012071	0.182525648276085	442	-0.120868692278143	-2.51870013391387	0.0119318499916939	432	-0.0428485191375732	-1.37734160102698	0.168574962500631	1034	-0.0814902484350043	-2.00219784485425	0.0454727543227804	603	-0.0562147956046229	-1.8077925155442	0.070781282873306	1034	-0.105895158801649	-2.60582140166894	0.0092602841517966	603
cg01074622	`			chr7:74572474-74573770	N_Shelf	rs199848680	1	0.000399		-0.0502733803267746	-1.05543309405168	0.291603134280504	442	-0.0464331626235506	-0.963551436876894	0.335638709804111	432	-0.0603811578014667	-1.26810847806646	0.205154323561457	442	-0.0870958485670899	-1.81064558431083	0.0705371000208888	432	-0.0596341880623131	-1.25238328270669	0.21082482860492	442	-0.0904287014787467	-1.88030599615825	0.0603909290220873	432	-0.0232723445807665	-0.747753424443587	0.454738533412647	1034	-0.0639279156472711	-1.56935231631466	0.116842710592594	603	-0.033005041254271	-1.06066417442762	0.289003146824666	1034	-0.0655762101803409	-1.60993090193595	0.107685497399132	603
cg01099825	`COBRA1	NM_015456	Body	chr9:140167199-140167452	N_Shore					-0.0911335087598841	-1.91695137462935	0.05555216476654	442	-0.170916547401018	-3.57933039577641	0.000359123565685406	432	-0.0472412172487913	-0.991678292790298	0.321719470478875	442	-0.105890975568281	-2.20406476790196	0.0277561107350782	432	-0.0450416151123205	-0.945440588852948	0.344789710418011	442	-0.109799056689038	-2.28605820065121	0.0224643696547159	432	-0.101994521183496	-3.2879824895889	0.00102227358088857	1034	-0.153800085996904	-3.80061402797889	0.000149759160716705	603	-0.0580056618457696	-1.86551193003131	0.0622464041926186	1034	-0.116567146165629	-2.87072855722152	0.00415343635792106	603
cg01105418	`ZNF238;ZNF238	NM_205768;NM_205768	1stExon;5'UTR	chr1:244213397-244213619	S_Shore					-0.171739972086109	-3.63850594826604	0.000286303121954744	442	-0.0790008245810625	-1.64161684988409	0.101045190523356	432	-0.148519971167335	-3.13859577230087	0.0017421612840511	442	-0.0599407127913465	-1.24444889505138	0.213737843049962	432	-0.14615067794043	-3.08779424828685	0.00206654883295016	442	-0.0602028290236317	-1.24990393812638	0.211738312599836	432	-0.0849883652069087	-2.73683270531587	0.00624716863196552	1034	-0.103267442868041	-2.54068975355483	0.0111689978404735	603	-0.0274691581742039	-0.882662076358294	0.377564435446871	1034	-0.0431340616359284	-1.05810106078435	0.29028484204903	603
cg01105948	`FRY	NM_023037	TSS1500	chr13:32605320-32605903	N_Shore	rs558782119;rs577074255;rs544148717	7;23;26	0.000599;0.000599;0.000200		-0.103331052875641	-2.1752545718545	0.0298498918904332	442	-0.144086415618526	-3.00877769096308	0.00268404965823977	432	-0.0864796728544959	-1.81855549590516	0.0693110774820443	442	-0.118271126585345	-2.46405456709491	0.0139039414073299	432	-0.0839964349040006	-1.76608540667247	0.0777249421464361	442	-0.121118841495938	-2.52396440477655	0.0117556579882941	432	-0.0690580229133227	-2.22200895649089	0.0263789984799947	1034	-0.0520947431230915	-1.27827551871929	0.201441761546718	603	-0.0344778637268434	-1.10803217456943	0.268011263124026	1034	-0.0204928621250116	-0.502459035409492	0.615503986580566	603
cg01110839	`SLC39A13;SLC39A13	NM_001128225;NM_152264	3'UTR;3'UTR			rs536078280;rs375762869;rs566254675	50;2;1	0.000200;0.001797;0.000200		-0.0186738923257718	-0.391752410806133	0.695414005962007	442	-0.100592544398192	-2.09301017419726	0.0366157444299776	432	-0.0209711725479418	-0.439959530673531	0.660159099432	442	-0.119536436314109	-2.49066886772343	0.0129100846546425	432	-0.0199550864699928	-0.418636998864927	0.675665413460179	442	-0.122551057613802	-2.55411096390949	0.0107904691720672	432	-0.0275426889645467	-0.885026023622423	0.376288399629886	1034	-0.119729797824225	-2.94935960049549	0.00323382740258497	603	-0.017656371139829	-0.567265581752118	0.570637107090066	1034	-0.107893391569604	-2.65537491495616	0.00800915880772452	603
cg01127300	`			chr22:38610335-38610828	S_Shelf	rs143494826;rs561900563	33;46	0.007388;0.000399		0.0991726557629268	2.08712365315883	0.037139979200448	442	0.154167637089483	3.22258311533235	0.00130778100483841	432	0.0223644777832779	0.469199480593133	0.639131518300311	442	0.0771491567471629	1.60298434480943	0.109320141817522	432	0.0274164575035741	0.575236621069016	0.565376601551467	442	0.0718594467086525	1.49268204383183	0.135916496730669	432	0.0700261418732775	2.25326068163562	0.0243353829483671	1034	0.1663106468017	4.1153823810166	4.05935344644147e-05	603	0.0339787257945232	1.09197868165531	0.275004946237763	1034	0.11720783117023	2.88665271044041	0.00394996637679905	603
cg01129847	`C19orf35	NM_198532	5'UTR	chr19:2278605-2278848	S_Shelf	rs566591355;rs528671575	1;51	0.000399;0.000200		-0.0436177056854115	-0.915513597544981	0.360271188748047	442	-0.0625163057230891	-1.2980585357211	0.194672112195505	432	-0.0478850504132767	-1.00521407299705	0.315161260288048	442	-0.100069297711115	-2.0820495670058	0.0376085023122433	432	-0.0479571998448939	-1.00673097571044	0.314431825629224	442	-0.103987918444303	-2.16416270994407	0.0306993900244475	432	-0.0101696206831335	-0.32670785442796	0.743950847750378	1034	-0.110810208631387	-2.72774703044051	0.00645339068031405	603	-0.012272502298751	-0.394270946855758	0.69345516344118	1034	-0.096130386302272	-2.36396526174048	0.0182180795569705	603
cg01132150	`C5orf56	NM_001013717	Body			rs184965860;rs142857812	0;32	0.000599;0.000799		-0.0261482066079441	-0.548614466376185	0.583505418168081	442	-0.0858010318392723	-1.7835935201994	0.0748372776344738	432	-0.0160647782646047	-0.337006624982537	0.736261673547152	442	-0.0693225536904538	-1.43981242759785	0.150321041533022	432	-0.0178763810223513	-0.375018082745866	0.707812867613928	442	-0.0732863996026502	-1.52242864424951	0.128294586824436	432	-0.0445517011645463	-1.43216061063932	0.1522649915522	1034	-0.130135972070547	-3.20851758124856	0.00136181351192857	603	-0.0425115239051972	-1.36649595477967	0.171951800619845	1034	-0.130082252076893	-3.20717794148317	0.00136813163094713	603
cg01133215	`RUNX2;RUNX2;RUNX2	NM_001015051;NM_001024630;NM_004348	Body;Body;Body			rs568476296;rs201647225;rs147359883;rs182416246;rs115974315	16;18;26;30;44	0.000200;0.001000;0.000599;0.000200;0.000399		-0.117657843155787	-2.47949580971016	0.013315686356347	442	-0.133180398053844	-2.77819154646318	0.00556373183469195	432	-0.0916194706835497	-1.92723082811791	0.054256321693158	442	-0.103730670289653	-2.15877013021518	0.0311170468555923	432	-0.0908009468015178	-1.90991728875481	0.05645368871872	442	-0.106930159820533	-2.2258605514662	0.0262537446220153	432	-0.104723861862067	-3.37660875780633	0.00074437338761124	1034	-0.12089482652396	-2.97834012827465	0.002944691412214	603	-0.0727081847360888	-2.33986179234112	0.0193736445410714	1034	-0.0854879899548764	-2.1008917573514	0.0358402264068815	603
cg01135781	`			chr5:177398162-177398434	N_Shore	rs374325649;rs567068483	44;38	0.002995;0.000200		-0.11003692504968	-2.317538087077	0.0206746713991196	442	-0.031435927843071	-0.652084131069291	0.514626041376817	432	-0.105220014084914	-2.21531334341358	0.0269664290006485	442	-0.0649037441310395	-1.34776730250598	0.178137939026249	432	-0.104630373026985	-2.20280724451144	0.0278396254209623	442	-0.0649667449908221	-1.3490792480718	0.17771618970801	432	-0.0246072498763448	-0.790661530044049	0.429276612337565	1034	-0.0689257506953822	-1.69241904420768	0.0908283391633502	603	-0.0279321540537812	-0.897547128352335	0.369574125519749	1034	-0.0824824139336027	-2.02668568444288	0.0428990742063471	603
cg01138448	`TRIM69;TRIM69;TRIM69;TRIM69	NM_080745;NM_182985;NM_182985;NM_080745	5'UTR;1stExon;5'UTR;1stExon			rs554051577	45	0.0002		0.0584881178545277	1.22825895758991	0.219743292876909	442	0.108507161876479	2.25894586847842	0.0241077607937864	432	0.0274173612903648	0.575255593321868	0.565363779266191	442	0.106294203047556	2.21252145641825	0.0271646074495671	432	0.0290813639254917	0.610187892049626	0.541995413424838	442	0.105139641709868	2.18830936415757	0.028887816635573	432	0.0875756152128684	2.82057092671423	0.00483118043296481	1034	0.138467859923561	3.41652952693865	0.000650564151015627	603	0.060552395208904	1.94761367076036	0.0515891695930514	1034	0.0933857590842904	2.29607021838456	0.0218225942370812	603
cg01143068	`STARD9	NM_020759	Body			rs185791709;rs537987524;rs565818607;rs116067069;rs78898799	0;1;21;34;47	0.000998;0.000200;0.000200;0.008586;0.041134		-0.0867570130186024	-1.82441700970363	0.0684195096644051	442	-0.137157964332223	-2.86220726190372	0.00428982500688797	432	-0.0821234555063162	-1.7265245187255	0.0846046912558985	442	-0.13008358649653	-2.7128423347374	0.00678093005092107	432	-0.0798649760100913	-1.67883740184879	0.093544452627122	442	-0.134810105432023	-2.81260374780469	0.00500549743476072	432	-0.0541848044112536	-1.7423802069198	0.081590452916913	1034	-0.161702432930661	-3.99928766872936	6.64041502843022e-05	603	-0.0533268145672522	-1.71473761167213	0.086544227749556	1034	-0.158794640696237	-3.92612337966347	8.99727321316403e-05	603
cg01151584	`EHD1	NM_006795	Body			rs61738612;rs145274478;rs571846024;rs137874978	38;21;14;1	0.015375;0.000220;0.000200;0.000200		0.111794932725619	2.35487369272261	0.0187193803750963	442	0.118951316681772	2.47836055526	0.013361613540861	432	0.0587431935075369	1.23362791629797	0.21773537435755	442	0.0775773418578531	1.61191684202744	0.107360676519377	432	0.0565351026861776	1.18715620169638	0.235556914212536	442	0.0801932011496161	1.66650015244563	0.0959852116893807	432	0.0867403601127258	2.79353316537457	0.00525292397311346	1034	0.142872645797272	3.52669432677589	0.000432884862587013	603	0.046699713123704	1.50130894570335	0.133440334762264	1034	0.105242995765396	2.58965323625451	0.0097047308865939	603
cg01152073	`SQSTM1;SQSTM1;SQSTM1	NM_001142298;NM_001142299;NM_003900	5'UTR;5'UTR;TSS1500	chr5:179247784-179248711	N_Shore					-0.0451247740411671	-0.947188497876897	0.34389882826529	442	-0.0828690221353089	-1.7223585000406	0.0853652231436324	432	-0.0527377083361309	-1.1072627959072	0.268563293227532	442	-0.123933048191169	-2.58321051696143	0.00992636403513279	432	-0.0522955535056255	-1.09796242740009	0.272602699475914	442	-0.128330076110308	-2.6758634183157	0.00757128510785482	432	-0.0321179426653342	-1.03213609920076	0.30216705015897	1034	-0.0905654570283676	-2.22633972986643	0.0261559919072078	603	-0.0303239104516044	-0.974447002864268	0.329988863311007	1034	-0.0693160468066421	-1.70203320467453	0.0890100468400442	603
cg01154283	`CRIM1	NM_016441	Body			rs150293071;rs537868750;rs556404131	4;5;38	0.000399;0.000200;0.000200		-0.0744748883840301	-1.56509633737047	0.117939036927055	442	-0.128341026777001	-2.67609429877774	0.0075661041517483	432	-0.0698078025340887	-1.46668637408527	0.142850800699317	442	-0.131810930878933	-2.749286230114	0.00607544477759515	432	-0.0684041034550763	-1.43710083920042	0.151080992838361	442	-0.136783669819099	-2.85429732726281	0.00439733532907313	432	-0.0245033634372894	-0.787322189951885	0.431227952976439	1034	-0.133352017939671	-3.28875258618484	0.00102899515232646	603	-0.0213772100486318	-0.686842312377542	0.492303439930314	1034	-0.12382056293472	-3.05115564374332	0.00231934767974412	603
cg01157559	`			chr16:29169898-29170414	N_Shelf	rs541334323;rs559778850	15;36	0.000399;0.000200		-0.113512485945635	-2.39136450213037	0.0169667895449436	442	-0.123270568991368	-2.56925992649542	0.0103326094573341	432	-0.102541657918022	-2.15851875165873	0.0311309667356143	442	-0.101459298163792	-2.1111688962256	0.0350202104921275	432	-0.0994878108427144	-2.09380027681643	0.0365389724819486	442	-0.107240016775731	-2.2323604174683	0.0258195579742016	432	-0.0972998990481278	-3.13565606887103	0.00173375500485793	1034	-0.174350372081366	-4.31836903990913	1.66613919162159e-05	603	-0.0753064326966254	-2.42378960394177	0.0154330256196918	1034	-0.158615316828374	-3.92161361226076	9.16582635576819e-05	603
cg01162920	`PRMT7	NM_019023	Body			rs113518480;rs183174448	48;38	0.028554;0.000200		-0.111517684326293	-2.34898466187551	0.0190166037717003	442	-0.107878629035456	-2.24575795989097	0.0249441881487833	432	-0.102386396591796	-2.15522740717686	0.0313883921781624	442	-0.0787610616485025	-1.63661389043959	0.102087778033201	432	-0.102815966101739	-2.16433399849023	0.0306805721477271	442	-0.0809574151190248	-1.68245078899848	0.092849889507014	432	-0.0714126579844408	-2.29802606396431	0.0216478180270248	1034	-0.0869528375142176	-2.13707190511747	0.0327746345098298	603	-0.0450178608062552	-1.44716597193918	0.148017130759621	1034	-0.0539322109263463	-1.32344856410482	0.185976013008253	603
cg01168584	`EMILIN2	NM_032048	Body	chr18:2905950-2907348	N_Shelf	rs539994603;rs540731299;rs71356079;rs75159164	43;42;41;9	0.000399;0.002596;0.001597;0.020967		-0.0276605098055747	-0.580359790617878	0.561919229562425	442	-0.0830963308343106	-1.72710475688354	0.0845085102994746	432	-0.0371094571852222	-0.778772157753063	0.436427259475695	442	-0.0908521276657568	-1.8891590827579	0.0591928333372868	432	-0.0360639402522227	-0.75681181171384	0.449469379683943	442	-0.0962882479745234	-2.00288083988199	0.0454824839546314	432	-0.0366761141303281	-1.17873995921177	0.23866814032656	1034	-0.107341459306284	-2.64168558572857	0.00833868526370157	603	-0.0383359207129915	-1.23213596659185	0.218066179025451	1034	-0.103862160628161	-2.55542751141239	0.0107088550366498	603
cg01174264	`ANTXR2;ANTXR2	NM_058172;NM_001145794	Body;Body	chr4:80993375-80994410	N_Shore	rs542990497;rs559664567	42;1	0.000200;0.000399		-0.0717682841032212	-1.50801690100037	0.131935711868909	442	-0.116997410816601	-2.43727161320494	0.0149717736531835	432	-0.0514943618734893	-1.08111110696583	0.280027257959402	442	-0.0866419547604662	-1.80116187582275	0.0720209262833648	432	-0.0505460925021072	-1.06116812646646	0.288990206473191	442	-0.0884303776818441	-1.83853377832304	0.0663185748725035	432	-0.0619955213448398	-1.99414846992776	0.0462586030538082	1034	-0.121982452038043	-3.00540269935071	0.00269621229432577	603	-0.0460955563361848	-1.48185868386686	0.138543365110823	1034	-0.101390790634259	-2.4941961987535	0.0127379027403668	603
cg01181940	`SLC9A3	NM_004174	Body	chr5:476317-476933	S_Shore	rs556397188;rs578024562;rs545149384	39;24;11	0.000998;0.000200;0.003195		-0.0842613211560442	-1.77168131357605	0.0767896953195139	442	-0.0453754240708335	-0.941571384888002	0.346775271785626	432	-0.0916316854268062	-1.92748921596369	0.0542240770643262	442	-0.0530588156238359	-1.10128525545872	0.27116363861465	432	-0.0905508905180139	-1.9046285794585	0.0571395179810657	442	-0.0570709391253775	-1.1847355655386	0.236521816004676	432	-0.030783150324233	-0.98921375738407	0.322714007557131	1034	-0.106606715352641	-2.62346460445059	0.00879611204619038	603	-0.0187986773612587	-0.603974091445413	0.545969958963738	1034	-0.0895371319401914	-2.20092392538957	0.0279110598924695	603
cg01201399	`ZNF629	NM_001080417	Body	chr16:30793716-30795268	N_Shore	rs201778896	1	0.0002		-0.0122003190850077	-0.255928750783793	0.798120558144625	442	-0.0614022670531266	-1.27486830954842	0.202760334945004	432	-0.023418919709928	-0.491329239753737	0.623406842362764	442	-0.0819358579003645	-1.70287570179856	0.0889558441767958	432	-0.0231651770692945	-0.486003800037023	0.62717561039284	442	-0.0814302545852608	-1.69232086492004	0.0909513685226274	432	-0.0209850597010067	-0.674238923275476	0.500278970329736	1034	-0.0504669799460882	-1.23826518875509	0.215906218765815	603	-0.0474706738300829	-1.5261309028073	0.127140786989247	1034	-0.0729080289626019	-1.7905393956455	0.0736147541993744	603
cg01204844	`			chr22:40440852-40441810	N_Shelf	rs569679059;rs185247592	16;3	0.000200;0.000599		-0.0950336174788943	-1.99947589133711	0.0458435455600138	442	-0.112872118541335	-2.35058243833889	0.0189400189651513	432	-0.0769048732316682	-1.61636185335131	0.106387399184377	442	-0.098346357023977	-2.04596676531209	0.0410402255031289	432	-0.0757057676000621	-1.59106188923268	0.111970756088162	442	-0.10405969844534	-2.16566745449626	0.0305837106746243	432	-0.0888355170158222	-2.8613623375292	0.00425271165418273	1034	-0.126191824224632	-3.11021068471827	0.00190430912152838	603	-0.0617185936729527	-1.98521806538965	0.0472439932250077	1034	-0.0977477353489513	-2.40399120107196	0.0163471739773864	603
cg01208566	`PELI2	NM_021255	Body	chr14:56585042-56586234	S_Shore	rs115501935;rs367379;rs556122553	27;39;41	0.002196;0.154952;0.000200		-0.130177272142468	-2.74620473372171	0.00613006559133023	442	-0.0874588754492373	-1.81823125264709	0.069368395058853	432	-0.133475365993567	-2.81660971260087	0.00494185417179647	442	-0.104509164234539	-2.17509025083628	0.0298678084471309	432	-0.132822508995744	-2.80266810236917	0.00515910219351778	442	-0.109192793985859	-2.27333391322032	0.0232230902882459	432	-0.0206980895579034	-0.665016071011893	0.506158428046927	1034	-0.0815591851982056	-2.00389915777966	0.0452898295401962	603	0.0021087205665634	0.0677422357877314	0.946003909228976	1034	-0.0588299905084659	-1.44390225195758	0.14905286375815	603
cg01244006	`SCNN1A;SCNN1A	NM_001159575;NM_001038	Body;TSS1500			rs528326546;rs547981175;rs561593874	1;8;27	0.000200;0.000200;0.000200		-0.0925113919460009	-1.94609986240833	0.0519433683750432	442	-0.131479535028198	-2.74229306459523	0.00620545502700218	432	-0.0574306771290457	-1.20600312787678	0.228208509989374	442	-0.125947789179732	-2.62565160048673	0.00877663917160752	432	-0.0555644157506427	-1.16673073097796	0.243708357395423	442	-0.129445909571489	-2.69939270729718	0.00705936683045293	432	-0.0319264816363614	-1.02597914671286	0.305059659999364	1034	-0.111961613711817	-2.75632868373511	0.0059180197272124	603	-0.0035844250133023	-0.115149275001939	0.908349008520885	1034	-0.0840742195215716	-2.06598181624255	0.0390269278475937	603
cg01256987	`GXYLT1;GXYLT1	NM_173601;NM_001099650	TSS1500;TSS1500	chr12:42538125-42538902	S_Shore	rs571260655	10	0.0002		-0.0508613374982391	-1.06779780536844	0.285989408933742	442	-0.0442584769050752	-0.918363258165262	0.358786621458452	432	-0.0501424844945694	-1.05268046096973	0.29286288545984	442	-0.0430928385361124	-0.894145867524859	0.371595978117922	432	-0.051681145052511	-1.08503955876859	0.27828423606994	442	-0.0413313579162577	-0.857553816469789	0.391481717395708	432	-0.0975401383051157	-3.14344764380538	0.00168841365528284	1034	-0.0728324267558971	-1.78867609048389	0.0739148111957774	603	-0.107214905915014	-3.45754182466843	0.000553614762451984	1034	-0.0806411391568063	-1.98124397228501	0.0477772741246059	603
cg01273344	`ZNF69	NM_021915	TSS1500	chr19:11998804-11999131	N_Shore	rs279183;rs552366038;rs10408418;rs528587532	36;30;24;11	0.300120;0.000599;0.117612;0.000799		-0.077378711648502	-1.62636067356711	0.104242666501463	442	-0.0995718746370159	-2.07163096992033	0.0385733332903372	432	-0.0660652713171906	-1.38781827753807	0.165586714997542	442	-0.108704589768153	-2.26308868589999	0.0238500827734234	432	-0.0646538511979997	-1.35808505781134	0.174831984363645	442	-0.110628523275441	-2.30346988807347	0.0214611565151526	432	-0.0720191409090745	-2.31760990406277	0.0205558129053797	1034	-0.0926109434603592	-2.27690966513637	0.0229461221042663	603	-0.0485499136247697	-1.56088132146228	0.118713457084203	1034	-0.0656455475104209	-1.61163807650157	0.107313083116583	603
cg01275830	`C10orf95	NM_024886	TSS1500	chr10:104210095-104210985	S_Shore					-0.0233247559696415	-0.489352964946596	0.624804290414792	442	-0.0871673912917842	-1.81214047491504	0.0703055153397161	432	-0.0144198676260559	-0.302494662441105	0.762409960248003	442	-0.0766345519612665	-1.59224980617654	0.111712241508026	432	-0.0152426198848551	-0.319756657441715	0.749295195108951	442	-0.0807662125452496	-1.67845983262954	0.0936265415013008	432	0.00215453137654187	0.0692139036047513	0.944832721935135	1034	-0.15763711734942	-3.89701776292674	0.000101388834600813	603	0.00502283209198471	0.161358616417348	0.871842007200866	1034	-0.162948803754785	-4.03066973465599	5.82040796760179e-05	603
cg01280180	`TXNDC6	NM_178130	5'UTR	chr3:138048193-138048778	N_Shore	rs577167574	18	0.0002		-0.00996859518721552	-0.209109943526927	0.834456486050694	442	-0.0611046089739582	-1.26867269435294	0.204962137604713	432	-0.0261278095850912	-0.548186322309194	0.583799173094282	442	-0.0585757009094364	-1.21604365574862	0.224370272289886	432	-0.0214905506376706	-0.450859010574994	0.652288263165401	442	-0.0625400328223478	-1.29855248254281	0.194502450474595	432	-0.0116715440502822	-0.374962541229235	0.707759037850534	1034	-0.130757466141992	-3.22401744731932	0.00129064482069189	603	-0.0326360798706337	-1.04879859810077	0.294430650382029	1034	-0.153018892520102	-3.78100125720049	0.0001619572662568	603
cg01280609	`BID;BID;BID	NM_001196;NM_197966;NM_197967	TSS200;TSS1500;TSS200	chr22:18256615-18257377	S_Shore					-0.0976342424490614	-2.05453808270625	0.0401955254069242	442	-0.11437565349072	-2.38216819323543	0.0173985851267564	432	-0.0695175098235165	-1.4605674483262	0.144524096036054	442	-0.0955277380661888	-1.98696416291741	0.0472230840373059	432	-0.0670413599809456	-1.40838398031141	0.159410772899528	442	-0.10220160583096	-2.12672300377596	0.0337011535519142	432	-0.0898254941412129	-2.89342094033286	0.00384300989707375	1034	-0.111688453142863	-2.74954726954095	0.0060412863497029	603	-0.0532224666357875	-1.71137591863269	0.087162902960189	1034	-0.0636535250600749	-1.56259806355686	0.118424665811945	603
cg01282418	`UBE2H;UBE2H	NM_003344;NM_182697	Body;Body	chr7:129592032-129592891	N_Shore					-0.140065065569306	-2.95747194755788	0.00316828814859965	442	-0.166096747112772	-3.47646382347276	0.00052755421768538	432	-0.12576224911369	-2.65205240323995	0.0081202175642971	442	-0.139232501179127	-2.90606335069704	0.00373586195933419	432	-0.121776114192818	-2.56713761883031	0.01039246819821	442	-0.144587977785227	-3.01939959417343	0.00259240871263984	432	-0.0985043925679276	-3.17472460041739	0.00151717192302666	1034	-0.165131695534254	-4.08566385670617	4.60985329159561e-05	603	-0.0644278912671004	-2.07260127688443	0.0383231728232554	1034	-0.119202287235934	-2.93624027839917	0.00337304134167092	603
cg01288337	`RIN3	NM_024832	Body			rs73326354;rs74072919;rs567302633;rs536131469	11;15;33;35	0.001797;0.116613;0.000200;0.000200		-0.0341150219473075	-0.715880545934587	0.474359117738851	442	-0.0840577241416873	-1.74718086844812	0.0809614450842817	432	-0.030527847207099	-0.640556563584788	0.522079633518907	442	-0.12342030844918	-2.57241296055367	0.0102395181434014	432	-0.0296671433805687	-0.622485917225115	0.533884852822993	442	-0.127620716165177	-2.66090889603656	0.00791372375411302	432	-0.0530798586723017	-1.70678169358136	0.0880141792184963	1034	-0.152231781472072	-3.76124477428665	0.000175186439731168	603	-0.0353849869370664	-1.13720889066318	0.255615727017552	1034	-0.121067913247933	-2.98264643064248	0.00290380235086512	603
cg01289206	`HCCA2	NM_053005	Body	chr11:1774588-1775040	N_Shore	rs199844212;rs181376129;rs546503314;rs184956082	38;22;21;11	0.007388;0.002196;0.000399;0.000200		-0.037510213228112	-0.787190205664235	0.431486304249635	442	-0.0771019271965387	-1.60199911149073	0.10953798858353	432	-0.0360960365377596	-0.757485946644826	0.449065750840219	442	-0.0798436647822716	-1.6592053034365	0.0974471149975513	432	-0.0353834611892093	-0.742519722595653	0.458074895208409	442	-0.0843852609175983	-1.75402133687549	0.0797808695857122	432	-0.0391915012831309	-1.25966264831499	0.207959448823249	1034	-0.121568533551508	-2.99510262010258	0.00278843136673188	603	-0.0208262051552697	-0.669133528325286	0.503529112886627	1034	-0.0970711601358708	-2.38724586537718	0.0171082885615886	603
cg01289541	`SLC7A14	NM_020949	5'UTR			rs534178646	27	0.0002		0.121288118575449	2.55674787915479	0.0107062164087145	442	0.169665826537138	3.55262032431288	0.000397206543049511	432	0.0517619105728262	1.08673825482595	0.277532832799396	442	0.112841632322192	2.34994210695116	0.0189724669946812	432	0.0556254326718436	1.16801460089472	0.243190216800564	442	0.113290289446002	2.35936613519623	0.0184997953959177	432	0.119200572367365	3.84758210972766	0.000122002149990978	1034	0.200131595739239	4.97341027750281	7.25333156523087e-07	603	0.0752742395806792	2.42274951201983	0.0154771800642594	1034	0.148177609986122	3.65956125886076	0.000260933387533481	603
cg01305421	`IGF1;IGF1;IGF1;IGF1;IGF1;IGF1	NM_001111283;NM_000618;NM_001111285;NM_001111283;NM_000618;NM_001111285	5'UTR;5'UTR;5'UTR;1stExon;1stExon;1stExon							-0.0161335456373371	-0.338449475525204	0.735174878071652	442	-0.0753680126842381	-1.56583370054847	0.117774976293792	432	-0.00337275086456546	-0.0707476872516324	0.943630604041491	442	-0.0625938659244244	-1.29967317660208	0.194117915361604	432	-0.00240052193412283	-0.050353869616324	0.959863207879866	442	-0.0666325041643534	-1.3837713763562	0.166832130642015	432	-0.0660280379226247	-2.12422525413812	0.0337590591386737	1034	-0.117869602356826	-2.90310350461301	0.00374931952079449	603	-0.0572111846033038	-1.83990455649269	0.0659215754375155	1034	-0.0944429858386431	-2.32221908400353	0.0203667590649652	603
cg01307555	`ALMS1P	NR_003683	TSS200			rs541959574;rs186763320;rs530836388;rs546198166	27;30;49;51	0.000399;0.000200;0.000200;0.000200		-0.0796847949869515	-1.67503368583965	0.0942890279999787	442	-0.0876279653007582	-1.82176465390409	0.0688294733117954	432	-0.0776673522742164	-1.63245185737546	0.102953061540339	442	-0.100794774025071	-2.09724665155631	0.0362380597540814	432	-0.0778412961498605	-1.63612272801301	0.102182031789171	442	-0.102721526177038	-2.13761868875631	0.0328026913663051	432	-0.0660154383375995	-2.12381872351921	0.0337930990117595	1034	-0.0710304433509561	-1.74427014985891	0.081366750261354	603	-0.054236708271882	-1.74405252042542	0.0812983011691146	1034	-0.0528256358138631	-1.29624302194574	0.195181459175258	603
cg01324550	`LOC404266;LOC404266;LOC404266;LOC404266;HOXB6;LOC404266	NR_033203;NR_033205;NR_033204;NR_033201;NM_018952;NR_033202	Body;Body;Body;Body;5'UTR;Body	chr17:46673532-46674181	S_Shore	rs556818866	15	0.000599		0.0717603426767407	1.50784945788157	0.131978588666872	442	0.0806009360457431	1.6750101291677	0.0943020601461087	432	0.0386125882362576	0.810347368365964	0.418062926228344	442	0.0707536262454775	1.46963407001516	0.142059098252185	432	0.0395590977017215	0.830231897561974	0.40673551832901	442	0.0673250713159941	1.39819747281459	0.16245680929846	432	0.0249380689005852	0.801295536769318	0.423096952553734	1034	0.0767026137399936	1.88408838452572	0.0597845128746095	603	0.0258096043801296	0.829311441401813	0.407067888129003	1034	0.0559403513339311	1.37282777434211	0.170094995624317	603
cg01325271	`SQSTM1;SQSTM1;SQSTM1	NM_001142298;NM_001142299;NM_003900	5'UTR;5'UTR;TSS1500	chr5:179247784-179248711	N_Shore	rs116436326;rs184793449	9;36	0.015176;0.000599		-0.0490392805567813	-1.02948240762469	0.303624738907635	442	-0.0971793018544895	-2.021532660668	0.0435119664498311	432	-0.0441909071182696	-0.927560393830089	0.353987484735671	442	-0.11969773258329	-2.49406212999189	0.012788003818105	432	-0.0436268339771636	-0.91570543926422	0.360170576523654	442	-0.123242055722028	-2.56865954164003	0.0103504206575984	432	-0.0552446289892058	-1.7765290483752	0.0757911968121969	1034	-0.115324968346264	-2.839861224853	0.00457516260239636	603	-0.0418465749433091	-1.34509655922494	0.17876271261579	1034	-0.0933789233121173	-2.29590116316406	0.0218322938613489	603
cg01328806	`HS1BP3	NM_022460	TSS1500	chr2:20850712-20851173	S_Shore	rs181726115	50	0.009585		-0.0665713473221579	-1.39848071225444	0.162362622384625	442	-0.112423928362683	-2.34116911776039	0.019421953049331	432	-0.0514949743342648	-1.08112398820864	0.280021530548087	442	-0.106104122127181	-2.20853489304117	0.0274420768426942	432	-0.050478036993222	-1.05973693041629	0.289640787478202	442	-0.110798624942799	-2.30704096377611	0.021260297061212	432	-0.0610854818554915	-1.96480253067083	0.0495631584988672	1034	-0.108633150412814	-2.67372541179224	0.00758574784751678	603	-0.0324277799542411	-1.04209992453561	0.297524729922224	1034	-0.0754181633888943	-1.85241646480874	0.0642031440360151	603
cg01360605	`					rs561148006;rs117086552;rs549868933;rs570873641	49;43;40;31	0.000200;0.000200;0.000399;0.000200		-0.108383793250188	-2.28244311926779	0.0226728207284212	442	-0.132945067941174	-2.77322367781171	0.00564880852723794	432	-0.0991265441559943	-2.08614680488475	0.0372286144547623	442	-0.124049744843045	-2.58566817393209	0.00985629090656045	432	-0.0984080307773045	-2.07092666833913	0.0386330844581173	442	-0.127372122971179	-2.65566877793391	0.00803696193051886	432	-0.031906016231093	-1.02532103015718	0.305369934916665	1034	-0.106728766444926	-2.62649115993057	0.00871861156048916	603	-0.0468136979495142	-1.50497870330194	0.132494054006229	1034	-0.109219131699741	-2.68826341203961	0.00726468296252419	603
cg01368075	`RAB7A	NM_004637	Body							-0.116725138499915	-2.45965879173531	0.014070628480906	442	-0.110991282660104	-2.3110857406608	0.0210347754055125	432	-0.0905186519047207	-1.90394674793834	0.0572284393468738	442	-0.0541372760164537	-1.12371311799462	0.261528605844184	432	-0.087858328705668	-1.84769585085202	0.0649713696093235	442	-0.0542540781749265	-1.12614231407181	0.260499421479618	432	-0.100997814559362	-3.25563025322946	0.00114570607595787	1034	-0.0683457570550204	-1.67813302539797	0.0935853003563046	603	-0.0720388339367166	-2.31824583711862	0.0205211734723598	1034	-0.0517307246071172	-1.26932738038162	0.204613627280011	603
cg01368217	`ADAM12;ADAM12	NM_003474;NM_021641	Body;Body			rs10901538;rs530093480;rs111727050	15;14;2	0.265575;0.000200;0.005791		-0.0828614502820173	-1.74211089382258	0.0818374821254465	442	-0.143746415771816	-3.00157818837897	0.00274783878378399	432	-0.0924656614711942	-1.94513233552762	0.0520599253810553	442	-0.120900566178371	-2.51937088695364	0.0119092707423319	432	-0.09094665435649	-1.91299912617868	0.0560572152073545	442	-0.119031512472699	-2.48004741474679	0.013298916193129	432	-0.0594549431244079	-1.9122308922523	0.0559783941612271	1034	-0.0837830105735562	-2.05879209660108	0.0397123198698798	603	-0.0546383549628337	-1.7569936732639	0.0790661065198654	1034	-0.0921291675838423	-2.26499714376647	0.0236697137856785	603
cg01403532	`LOC652276	NR_015441	Body	chr16:2660772-2660978	N_Shelf	rs540941641;rs142009764	0;50	0.000200;0.000200		-0.0184944041330519	-0.387986133941507	0.69819757034864	442	-0.0632280004290404	-1.31287512047883	0.189630019073927	432	-0.0338525222360575	-0.710367939014861	0.477768234878299	442	-0.0894836811035586	-1.86054976533368	0.0631372255030585	432	-0.0313476790207509	-0.657769977492267	0.510960699314255	442	-0.0883385006885967	-1.83661357618695	0.0666022075207431	432	-0.011194408290514	-0.359632666878089	0.719189811150874	1034	-0.0228303229668073	-0.559789519351625	0.575798418406065	603	-0.0329585603531196	-1.0591693607245	0.289683160821221	1034	-0.0519482745861633	-1.27467505468216	0.202713683403243	603
cg01409343	`TMEM49	NM_030938	Body			rs548744804	24	0.0002		0.0524616736561262	1.10145657935514	0.27108023928367	442	0.0852688669136856	1.77247698203665	0.0766654206721918	432	0.0271276279849072	0.569173572451726	0.569481426693514	442	0.0564365929635045	1.17153897702787	0.241780904642123	432	0.0278930299719407	0.585240940843499	0.558634729615522	442	0.0588841102217074	1.22246110248581	0.221935658533788	432	0.0981810792511616	3.16423680812889	0.00157272275680416	1034	0.1225667480012	3.0199443040641	0.00257076221014602	603	0.0648509300115541	2.08624831465958	0.0370683191557226	1034	0.0841170634196159	2.06703962824185	0.0389269407302885	603
cg01418153	`PRDM16;PRDM16	NM_022114;NM_199454	Body;Body	chr1:3239915-3240261	Island	rs540570884	11	0.000399		-0.0808105482336424	-1.69880074016803	0.089713736834382	442	-0.146275732475397	-3.05515384717386	0.00230458221759962	432	-0.0595349773655468	-1.25029480680997	0.211586389122799	442	-0.130689105884049	-2.72561580914194	0.00652568084662494	432	-0.0583055746523948	-1.22441679656222	0.221188353718038	442	-0.134609139446236	-2.80835940771964	0.00507149402380755	432	-0.0308091137127516	-0.990048616708241	0.322305862711764	1034	-0.131368687519857	-3.2392636156084	0.00122400717908773	603	-0.00815979988886733	-0.262137405045294	0.793265581234321	1034	-0.115113923259755	-2.83461778149876	0.00465054121801382	603
cg01418351	`MAEA;MAEA	NM_005882;NM_001017405	Body;Body			rs73796072;rs559124939;rs576913279;rs56887292	3;18;22;32	0.004992;0.000200;0.000599;0.268570		-0.0661030699289271	-1.38861462565279	0.165344262205388	442	-0.100964126285622	-2.10079452024983	0.0359243276686043	432	-0.0562493001307677	-1.18114203113022	0.237936739369745	442	-0.116229223609165	-2.42112253750905	0.0156500282750029	432	-0.0545540608345186	-1.14547290210367	0.252400542977635	442	-0.121705826086736	-2.53631848767241	0.0113512169675232	432	-0.0283121793125669	-0.909765010107648	0.363094760299213	1034	-0.104933588410759	-2.58198331854041	0.00992214860700194	603	-0.0150633542830046	-0.483943198261688	0.628515869125184	1034	-0.093298041419652	-2.29390089269492	0.0219473456839735	603
cg01434694	`FAM38A	NM_001142864	Body	chr16:88838112-88838459	N_Shore	rs144717444	21	0.002396		-0.0264474876321854	-0.554896582715161	0.579203131287961	442	-0.103763985691973	-2.15946848990174	0.0310626849813221	432	-0.014849196976805	-0.311502280173786	0.755557651148897	442	-0.106840230190579	-2.22397418022306	0.0263809297834825	432	-0.0125538943497182	-0.263346544535943	0.792401437787555	442	-0.110517640369638	-2.30114211084728	0.0215929739762792	432	-0.0508509830221761	-1.63498569705467	0.10220906991625	1034	-0.102715114298741	-2.52700408520582	0.0116119441111354	603	-0.0298108493615216	-0.957950125796573	0.338240712066486	1034	-0.0752308034572967	-1.84779707019333	0.0648696094971878	603
cg01439105	`UNKL	NM_001037125	TSS1500	chr16:1463762-1464716	S_Shore	rs73490054;rs76202519;rs113959668;rs539121152	35;31;14;6	0.025559;0.010982;0.001398;0.000200		-0.0923621386046103	-1.94294211636431	0.052324588156502	442	-0.10936947623381	-2.27704195712249	0.0229997211508399	432	-0.0943533965303532	-1.98507835507519	0.0474262192473553	442	-0.132094817832165	-2.75527735006455	0.00596602282068516	432	-0.0928554484620486	-1.95337938552739	0.0510734010515365	442	-0.135913073237945	-2.83590227080734	0.00465687295579963	432	-0.0688259885002314	-2.21451930906958	0.0268902478014165	1034	-0.0839665180207263	-2.0633227097355	0.0392792380873488	603	-0.0560704737462436	-1.80314155111484	0.0715089182070384	1034	-0.071196731270948	-1.74836746906332	0.0806545526572551	603
cg01445838	`PLAGL1;PLAGL1;PLAGL1;PLAGL1;PLAGL1;PLAGL1;PLAGL1;PLAGL1	NM_001080956;NM_001080951;NM_001080953;NM_001080952;NM_002656;NM_001080955;NM_001080954;NM_006718	5'UTR;5'UTR;5'UTR;5'UTR;5'UTR;5'UTR;5'UTR;5'UTR			rs576028104;rs543366942;rs190960128;rs372806508	50;35;18;13	0.000399;0.000200;0.000799;0.000998		-0.042815742652073	-0.898660000915732	0.369178989570737	442	-0.0640931900704369	-1.33088908053966	0.183630440032103	432	-0.0236458638219677	-0.496092297284032	0.620044406597487	442	-0.0553017442526041	-1.14793256652419	0.251392885569611	432	-0.0223036265882789	-0.467922418146633	0.640044022433619	442	-0.0598928931526927	-1.24345371319267	0.214104090408739	432	-0.0221796926903364	-0.712634106544342	0.476197128273747	1034	-0.147805179713098	-3.65022657523608	0.000270524157015534	603	-0.0227698080641029	-0.731601000418332	0.46453963309327	1034	-0.148879840346065	-3.67716500085455	0.000243708861369059	603
cg01455178	`SLC45A3	NM_033102	5'UTR	chr1:205648975-205649903	N_Shore					-0.0791587842103837	-1.66392995006926	0.0964898154928159	442	-0.128603082227732	-2.68161959163557	0.00744306218245989	432	-0.0811093079310803	-1.70510892354995	0.0885299096613675	442	-0.126569783797653	-2.63875849656895	0.00844648005580827	432	-0.0788645146229274	-1.65771852212644	0.0977387666310131	442	-0.131955238171814	-2.75233161873022	0.00601959957932656	432	-0.048868352527121	-1.57113542251757	0.116312314484732	1034	-0.147609279138681	-3.64531689706531	0.00027570027540049	603	-0.0366258699512432	-1.17712370607218	0.239312479991827	1034	-0.121387283244565	-2.99059266126463	0.00282971040008625	603
cg01471293	`RGL2;RGL2	NR_028387;NM_004761	Body;Body	chr6:33266302-33267582	N_Shore	rs147123747	15	0.003794		-0.0458880811955913	-0.963232990106345	0.335790035756052	442	-0.0682209431500381	-1.41686038997997	0.156925797043997	432	-0.0392812639917313	-0.824394938110057	0.410041438926298	442	-0.0932658604540242	-1.93963914791445	0.0527328773539956	432	-0.0380184392143218	-0.797866069442123	0.425267059722365	442	-0.0969729759133172	-2.017213491992	0.0439617329668511	432	-0.0469791741274956	-1.5103063021482	0.131129547911106	1034	-0.128452644349024	-3.16654868958707	0.00157309848141354	603	-0.0297624209697532	-0.956392993932749	0.339026389498245	1034	-0.103523026166138	-2.54702316294728	0.0109691447031892	603
cg01484915	`RASSF4	NM_032023	5'UTR	chr10:45454795-45455044	S_Shelf	rs181303630	44	0.0002		-0.0148004385478503	-0.31047928991146	0.756334907182042	442	-0.0613175653254838	-1.27310525918564	0.203385125775058	432	-0.0277859814045692	-0.582993729474105	0.560145705761674	442	-0.0501978751279907	-1.04180093501823	0.297886380212849	432	-0.0254413181897943	-0.533776776654037	0.593725702700597	442	-0.0496525329046194	-1.03046422064675	0.303172645617003	432	-0.0791947017983413	-2.54944935881284	0.0108499001611479	1034	-0.124977522005526	-3.07996467062164	0.00210749531926753	603	-0.0815360646820496	-2.62515405348493	0.00871438612253504	1034	-0.119763634724122	-2.95020119007848	0.00322507839097584	603
cg01495509	`KCNIP1;KCNMB1;KCNMB1	NM_001034838;NM_004137;NM_004137	Body;1stExon;5'UTR			rs574900438;rs139846683	1;42	0.000399;0.003994		-0.0714234424189979	-1.50074617120861	0.133807486048681	442	-0.116084047494085	-2.41807092808202	0.0157811921765946	432	-0.0636231033003973	-1.33637459425773	0.18182253919988	442	-0.131339669887316	-2.73934179535428	0.00626107073807138	432	-0.064329638662859	-1.35125591456839	0.177008907261162	442	-0.135412691305582	-2.82533158261545	0.0048122234321076	432	-0.0411763376196785	-1.32352818073497	0.185828545459998	1034	-0.115673392774492	-2.84851844260949	0.00445312898707444	603	-0.0242422341377691	-0.7789284885231	0.436155466861282	1034	-0.0854806082527689	-2.10070946055403	0.0358562721351318	603
cg01511647	`			chr14:81902091-81903147	N_Shore	rs534858224;rs553168598;rs150062502	1;14;47	0.000200;0.000200;0.000399		-0.0843915427366362	-1.77443242752482	0.0763332790717451	442	-0.055114199219457	-1.14403166028094	0.253006590631866	432	-0.0734204933137306	-1.54285755018865	0.123246893776483	442	-0.0516124313560206	-1.07121001099352	0.284461977109801	432	-0.069185222720273	-1.45356364962592	0.146457781950746	442	-0.0542553352605414	-1.12616845851202	0.260488360071641	432	-0.0405364548030602	-1.30293772964814	0.192764760773929	1034	-0.0555387768418997	-1.36295237264773	0.173186836371302	603	-0.0315620240841347	-1.0142592262147	0.310616460427928	1034	-0.0369934242081684	-0.907318986113164	0.364492368699772	603
cg01516372	`LOC339524	NR_026989	Body	chr1:87617692-87617986	Island	rs192923052	48	0.001398		-0.0741493922178114	-1.55823075837797	0.119558171739842	442	-0.114799242455108	-2.39106878842938	0.0169846092962569	432	-0.0374676884092278	-0.786296942126124	0.432009058732449	442	-0.0878336197747803	-1.82606227331206	0.0681786386164299	432	-0.0353029128238468	-0.740828012644741	0.459099592723138	442	-0.090499500720938	-1.88178623439745	0.0601892172969798	432	-0.082409460996852	-2.65340150927485	0.0080193665017851	1034	-0.12245163644654	-3.01707931034559	0.00259504759791043	603	-0.0364442037557542	-1.17127992337237	0.241652416377086	1034	-0.0697093196896004	-1.71172122065853	0.0872075906151898	603
cg01517968	`ACVR1B;ACVR1B;ACVR1B	NM_004302;NM_020327;NM_020328	Body;Body;Body	chr12:52345531-52345903	S_Shelf	rs563641319	24	0.000599		-0.0797529616202452	-1.67647270632163	0.094006783097788	442	-0.104805017746682	-2.18129314080288	0.0294044532283472	432	-0.0632802337032945	-1.32915342759976	0.184193097833108	442	-0.111448030338422	-2.32067568812776	0.0205083977434439	432	-0.0613489267501648	-1.28848405481951	0.19797307745908	442	-0.114806347155254	-2.39121808227262	0.0169777399202914	432	-0.0369235014608276	-1.1866979940589	0.235513434031057	1034	-0.129166670560724	-3.18434859285267	0.00148004651932173	603	-0.00121409595771055	-0.0390025565471756	0.968895886157984	1034	-0.0838486423711048	-2.06041246312147	0.0395569652681897	603
cg01518279	`			chr1:156405160-156406350	N_Shelf					-0.0378781528455748	-0.794919153966958	0.426978533600596	442	-0.00886439209205867	-0.183820761572828	0.854238831305414	432	-0.061489941067112	-1.29145319672431	0.196942181726057	442	-0.0444420862195796	-0.922178165680913	0.356794433687761	432	-0.0613589029467998	-1.2886941079893	0.197900016663954	442	-0.0459973133715763	-0.954494129245419	0.340199520428005	432	-0.00955731154621619	-0.307035657830097	0.758874616394022	1034	-0.104474378710975	-2.57060086923243	0.0102528119515363	603	-0.0186854062882932	-0.600334007138017	0.548392189333213	1034	-0.120416269233117	-2.96643483745737	0.00306048558603564	603
cg01519094	`PKNOX2	NM_022062	TSS1500	chr11:125034243-125034495	N_Shore	rs562034448;rs567624220	1;41	0.000399;0.003994		-0.0455799461899945	-0.956755948267887	0.339048546640978	442	-0.0892722894856444	-1.85613095610642	0.063765418010932	432	-0.0433333837369962	-0.909538315982847	0.363413790015924	442	-0.109764464954683	-2.28533214068017	0.0225070753071849	432	-0.0431003753359543	-0.904641544813275	0.366001927299412	442	-0.112766052796211	-2.34835465670322	0.0190531190942551	432	-0.017511122588998	-0.562598064230556	0.573811217393425	1034	-0.119330165682866	-2.93942049382629	0.00333880232480329	603	-0.000810991012929378	-0.0260528947758906	0.979220183297658	1034	-0.107885513444839	-2.65517950576434	0.00801377934529772	603
cg01519765	`ETV5	NM_004454	TSS1500	chr3:185825462-185827003	S_Shore					-0.0828831257345222	-1.74256870612078	0.0817573266676965	442	-0.126449285396223	-2.63621914710042	0.00850956336388756	432	-0.0585309292803734	-1.22916006244487	0.219405365886728	442	-0.104424098925049	-2.17330683613486	0.0300021870491697	432	-0.0578299724795643	-1.2144067284178	0.224985196073637	442	-0.104880834488808	-2.18288278364675	0.0292867084706346	432	-0.128253537413086	-4.14292984944412	3.53091341506197e-05	1034	-0.0962929216613886	-2.36798709388013	0.0180219645708745	603	-0.0899118784248112	-2.89621860947862	0.00380901609444904	1034	-0.052419431005907	-1.28625713630666	0.198642917227781	603
cg01531701	`MSRB3;MSRB3	NM_001031679;NM_198080	5'UTR;Body	chr12:65672391-65673250	S_Shelf					-0.0403541952271041	-0.846936674580963	0.397362702465152	442	-0.048612639539295	-1.00884834994595	0.313424060415207	432	-0.0633877490593213	-1.33141777145984	0.183447308220037	442	-0.0385891417019439	-0.800599028210587	0.423690866403308	432	-0.0613484874160294	-1.28847480445367	0.197976295379854	442	-0.0456939461956949	-0.948190123649272	0.343397262860866	432	-0.0558011636365285	-1.79446287530297	0.0728830778535046	1034	-0.0863743033021807	-2.12278163603109	0.0339575183252316	603	-0.0888337765386279	-2.86130598037479	0.00425346552088142	1034	-0.1216335544074	-2.99672055000745	0.00277375733921141	603
cg01534527	`CTDSPL;CTDSPL	NM_005808;NM_001008392	Body;Body							-0.0127324519178027	-0.267092598498276	0.789517452383836	442	-0.10140154502348	-2.10995885253085	0.0351246527238907	432	-0.0213265618754832	-0.447417575971693	0.654769292666427	442	-0.111002337649091	-2.3113178413397	0.0210218978863002	432	-0.0212155129442123	-0.445087139512995	0.656451543675273	442	-0.116022919580904	-2.4167860473936	0.0158367077271631	432	-0.0431058791584885	-1.38562452805176	0.166029756346539	1034	-0.101822562169872	-2.50489162694362	0.0123606457175315	603	-0.0487483998366434	-1.56727276966874	0.117212288021122	1034	-0.106861209872861	-2.62977550904077	0.00863520128338904	603
cg01538969	`DHX16;DHX16	NM_001164239;NM_003587	Body;Body							-0.0382912075863574	-0.803596048769444	0.421950776600528	442	-0.108953028345033	-2.26830216483845	0.0235292123535928	432	-0.0449283081468269	-0.943059022441818	0.346005927756777	442	-0.12716335506096	-2.65126840114678	0.00814177677546387	432	-0.0430536351863513	-0.903659292468397	0.366522469635143	442	-0.131037340981862	-2.73296278419848	0.00638281878303555	432	-0.0243105450568456	-0.781124254246012	0.434863318184208	1034	-0.0798629172184345	-1.96204195753295	0.0499746323657578	603	-0.0188058392851328	-0.604204247874181	0.545816983966601	1034	-0.0732544265378278	-1.79907703506108	0.0722526203302628	603
cg01542019	`TECR	NM_138501	Body	chr19:14676201-14676542	N_Shelf	rs540641316;rs552583260;rs572696380;rs181340814	45;37;22;7	0.000200;0.000599;0.000998;0.000799		-0.140470443519169	-2.96614588743943	0.00308092405311243	442	-0.0120753214017593	-0.250411365653242	0.802384137505362	432	-0.158603277839839	-3.35521514901535	0.000819259052585816	442	-0.0534188290462703	-1.10877187262081	0.267920668861682	432	-0.157268456626087	-3.32649942071342	0.000907666481702845	442	-0.0529344459641212	-1.09869900745351	0.272290152339919	432	-0.0440617346996537	-1.41638959694796	0.156829008102767	1034	-0.119688288514125	-2.94832719258095	0.003244589686201	603	-0.0287274591211203	-0.923116633101668	0.356096033695755	1034	-0.101311608682369	-2.49223488257222	0.0128081798207454	603
cg01546047	`LOC100130872-SPON2;SPON2;SPON2	NR_033182;NM_012445;NM_001128325	Body;TSS1500;TSS1500	chr4:1164515-1166582	S_Shore					-0.0317202720146041	-0.665593333637251	0.505948485685529	442	-0.0961540240992205	-2.00007150410416	0.0457857105587846	432	-0.0327279243116632	-0.686751999335517	0.492523537990784	442	-0.0873135525439374	-1.81519458367019	0.0698343217964695	432	-0.0311013306226698	-0.652597486851549	0.514288781376163	442	-0.0877999770909981	-1.82535922198855	0.068284761325558	432	-0.0169340824636173	-0.544055289897532	0.586503054192538	1034	-0.143561573971278	-3.54393728198331	0.000405734135025149	603	-0.0104041784603242	-0.334243763464473	0.738258984862315	1034	-0.133745635546291	-3.29857747020879	0.000993880077971766	603
cg01549227	`LHX6;LHX6	NM_199160;NM_014368	Body;Body	chr9:124981535-124982835	N_Shore	rs146475417	21	0.000799		-0.0381963333058668	-0.80160303411581	0.423102528699656	442	-0.0835387716465901	-1.73634353890417	0.0828608607256384	432	-0.0209758732525684	-0.440058176878978	0.660087693322327	442	-0.0808079189681	-1.67933035694161	0.0934566915052182	432	-0.0189099517050459	-0.396705783358513	0.69175934051896	442	-0.0872240097136282	-1.81332353440747	0.0701226817825369	432	0.0062275604979325	0.200061452827623	0.841470923994845	1034	-0.0405198197260377	-0.993899776060132	0.320539197693028	603	0.0228397164592379	0.733847959158853	0.463169203004795	1034	-0.0110517770121516	-0.270948675585885	0.786519296271395	603
cg01555705	`CX3CL1	NM_002996	3'UTR	chr16:57415974-57416338	S_Shelf	rs534183428	30	0.0002		0.0193143592417553	0.405191807257712	0.685514950661256	442	-0.0636155953399835	-1.32094491906926	0.186924715818829	432	0.00849958913499389	0.178293179373539	0.858573108637264	442	-0.105832758220589	-2.20284386494977	0.0278424187730286	432	0.0080703299763711	0.169288345063971	0.865646197817801	442	-0.108149034049277	-2.25143138947164	0.024581322848063	432	-0.0325454863150384	-1.04588520767258	0.295773667327673	1034	-0.108633232579564	-2.67372745019035	0.00758570195190624	603	-0.0340015194287315	-1.09271176856722	0.274682886658798	1034	-0.107174612454417	-2.63754768122877	0.00844065380970088	603
cg01557792	`KIAA0247	NM_014734	Body							-0.0696900611650293	-1.46420453636322	0.143527686435355	442	-0.106942256003824	-2.22611428479165	0.0262366776574487	432	-0.0347498175824592	-0.729211937547914	0.466170267290389	442	-0.0780790006817133	-1.62238285602636	0.1051003612578	432	-0.0316364365007383	-0.663833018553451	0.507074009312323	442	-0.0842306246238193	-1.75079177525942	0.0803364923753042	432	-0.0903599812747906	-2.91073171634152	0.00363701842764068	1034	-0.147304436049785	-3.63767746871367	0.000283939353627895	603	-0.0477461283250255	-1.53499991366966	0.124946928822066	1034	-0.0928665538602609	-2.28323039241239	0.0225700547148405	603
cg01565774	`IKZF4	NM_022465	TSS200							-0.0677982882448704	-1.42433394177568	0.154742298058835	442	-0.11363106242433	-2.36652470879335	0.0181476766742491	432	-0.0662937290449897	-1.39263152800573	0.164125368903079	442	-0.124125152347897	-2.58725631088309	0.00981124470989929	432	-0.0647301583064677	-1.35969241610656	0.17432252828666	442	-0.128592000374013	-2.68138592927482	0.00744822897115084	432	-0.0488988613033488	-1.57211785716723	0.116084282142297	1034	-0.109152451742775	-2.6866090097824	0.0073005938772847	603	-0.0376056839404423	-1.20864341567815	0.226967187552235	1034	-0.0981137464093563	-2.41305095959822	0.0159479295267705	603
cg01567771	`					rs568867715	43	0.0002		0.108056944163779	2.27550582780923	0.0230871023652855	442	0.153216000506128	3.20237215072378	0.00140224952673963	432	0.0496940923859652	1.04325141295432	0.297205809866304	442	0.12342886608371	2.57259316053992	0.010234220504426	432	0.0497888907281427	1.04524485195582	0.296284077390119	442	0.122184057600891	2.54638500242302	0.011030859639005	432	0.0706765466862025	2.27425870459229	0.0230406763946085	1034	0.194058485995534	4.81850821286355	1.57766533008928e-06	603	0.0229336883854877	0.736868366531524	0.461330600575414	1034	0.138506141394395	3.41748635948814	0.000648297608903095	603
cg01568846	`ACTL6A;ACTL6A;ACTL6A	NM_177989;NM_178042;NM_004301	5'UTR;5'UTR;Body	chr3:179280362-179281463	Island	rs372453104	26	0.001398		-0.0138314618852354	-0.290149695893363	0.771831336069018	442	-0.088540617818272	-1.84083780625835	0.0659795629672539	432	-0.0198878515116086	-0.417226106545523	0.676696419577706	442	-0.118146356402784	-2.46143061219172	0.0140054982216678	432	-0.0185138385522348	-0.388393933389033	0.69789597852894	442	-0.118245343167697	-2.46351232754129	0.0139248745780479	432	-0.0256330491082596	-0.823635891346819	0.410285507521414	1034	-0.0383993998831849	-0.941835958477423	0.346536514719292	603	-0.0336501006084568	-1.08140959252607	0.279676825316842	1034	-0.0365341479207485	-0.896044450936765	0.370481312126806	603
cg01574390	`METTL9;METTL9	NM_001077180;NM_016025	Body;Body							-0.0225447804925117	-0.472983450055917	0.636430957850392	442	-0.0947051567892532	-1.96975102384946	0.0491682517262957	432	-0.0266840769635928	-0.55986282730302	0.575812602461864	442	-0.106880101197685	-2.22481051318933	0.0263244759283665	432	-0.0255533058721477	-0.536127378255739	0.592101137447969	442	-0.110555139426435	-2.3019293262685	0.0215483167586183	432	-0.0326415152123016	-1.04897339333783	0.294350203396221	1034	-0.100767764022847	-2.47876485071323	0.0133001788319037	603	-0.0266649347512914	-0.856807651481872	0.391693983564882	1034	-0.0935656725374929	-2.30051972945302	0.0215686472662138	603
cg01578324	`CLIC1	NM_001288	TSS1500	chr6:31707489-31708336	N_Shelf	rs28366163	30	0.066494		-0.0182155425826507	-0.382134713300885	0.702530275642475	442	-0.0809978554489884	-1.68329491276733	0.0926862857203968	432	-0.0257276140642179	-0.539786103115208	0.589576564574652	442	-0.101986821109141	-2.12222222027581	0.0340783936368797	432	-0.0223778812160664	-0.469480774150123	0.638930597985547	442	-0.104371950327063	-2.1722135440578	0.0300848225376884	432	-0.0892517792580008	-2.87484153449829	0.00407584929767088	1034	-0.126863819502456	-3.12695288282689	0.00179973837503019	603	-0.071826739498693	-2.31139691630277	0.020896928559559	1034	-0.0938038199161579	-2.30640967933284	0.0212364525497546	603
cg01579884	`ELMO1;ELMO1;ELMO1	NM_001039459;NM_014800;NM_130442	5'UTR;Body;5'UTR			rs143318383;rs188880036;rs542591246;rs115718980;rs528749112	46;24;21;6;1	0.001997;0.003594;0.000200;0.003594;0.000200		-0.102277852591026	-2.15292647394682	0.0315694386650324	442	-0.0928478108639754	-1.93089456258627	0.0538076980483419	432	-0.0893115644850725	-1.87842029098538	0.0606413157972621	442	-0.102639578074389	-2.1359012694712	0.0329429324031286	432	-0.0855646421465982	-1.79921855876855	0.0723202960180501	442	-0.103054678511428	-2.14460099711565	0.0322377877979387	432	-0.0820392476704611	-2.64142754192618	0.00830768045574842	1034	-0.103735079989282	-2.55227815965127	0.0108057421003147	603	-0.0741170502728542	-2.38536650644633	0.0171398184036068	1034	-0.0876857032185821	-2.15517636983709	0.0313268834768837	603
cg01581098	`SYPL1	NM_006754	TSS1500	chr7:105752103-105753148	S_Shore					0.00262889354749702	0.055144263305976	0.956048512246708	442	-0.0899797521110565	-1.87092001186091	0.0616830501046934	432	0.0102572160002857	0.215164724046865	0.829735647724203	442	-0.0915449165199771	-1.90364554517944	0.0572750029858573	432	0.0101653824085681	0.213238205495151	0.831237071885026	442	-0.095312132563506	-1.98245219069253	0.0477265850864082	432	-0.000910106305244342	-0.0292369517980441	0.976681260150879	1034	-0.121361946361467	-2.98996223259302	0.00283552490604764	603	-0.0147102422297238	-0.472597044808131	0.636588457064541	1034	-0.123202248244876	-3.0357626511371	0.00244038113911317	603
cg01592687	`ZBTB45	NM_032792	Body	chr19:59028055-59028288	N_Shore	rs115503568;rs540780222	24;26	0.013179;0.000399		0.0724306559647593	1.52198353412283	0.128397202236334	442	0.0427701659800773	0.88744243173613	0.375191222353105	432	0.0376385419287543	0.789885857013934	0.429910986025956	442	-0.0198601406291	-0.411882799437661	0.680610728880025	432	0.0411849253918368	0.864391230749272	0.387709797803766	442	-0.0224366314697826	-0.465333986544235	0.641899933260364	432	0.130560889995753	4.21831545013595	2.53951544193625e-05	1034	0.171927017605769	4.25712379172474	2.18850571698944e-05	603	0.0978929313133662	3.15489029390922	0.00162380123685642	1034	0.122673813138455	3.0226091054122	0.00254836066101873	603
cg01595717	`EHMT1;EHMT1	NM_024757;NM_001145527	Body;Body	chr9:140588011-140588931	N_Shore	rs191853043	25	0.000799		-0.0432814041097818	-0.90844593332681	0.363990161774271	442	-0.0775953612752006	-1.61229276353135	0.107278827729837	432	-0.0438096502756468	-0.919547569708895	0.358159274265699	442	-0.0902281506823024	-1.87611307533233	0.0609653444549243	432	-0.043072252902625	-0.90405054652786	0.366315070097595	442	-0.0925149214850806	-1.92393181255884	0.0546765477066343	432	-0.059542691000003	-1.915059786011	0.0556163844901291	1034	-0.146814692944602	-3.62540587687053	0.000297659137654807	603	-0.0403660247868774	-1.29745373333352	0.194643831857642	1034	-0.111466248358466	-2.74403117967804	0.00614325512650441	603
cg01597553	`C18orf1;C18orf1	NM_181482;NM_181481	5'UTR;5'UTR	chr18:13217073-13219044	S_Shore					-0.123881268593553	-2.61197214103711	0.00913049413643413	442	-0.130063335452708	-2.71241517295974	0.006789619055535	432	-0.0870490270056638	-1.83058895820481	0.0674909462290941	442	-0.105812010493606	-2.2024087584392	0.027873233252299	432	-0.0822952521884753	-1.7301526768046	0.083953872167007	442	-0.111056921954634	-2.31246385314137	0.0209584150828673	432	-0.0868194942854926	-2.79609462112901	0.00521158839227827	1034	-0.147729802248979	-3.64833742393181	0.000272504944381667	603	-0.0306856929686919	-0.986080003376946	0.324249040238704	1034	-0.0754018837960868	-1.85201508315965	0.0642608282331376	603
cg01603921	`			chr2:91634538-91636111	Island	rs190361573;rs113097949;rs112605707	1;10;43	0.006589;0.500000;0.500000		-0.0603754282886684	-1.26798785505628	0.205197393559481	442	-0.0648559426480985	-1.34677187973144	0.178458433473072	432	-0.029369802096247	-0.616243394419229	0.537994122993953	442	-0.045419581666728	-0.942488947320664	0.346305714647503	432	-0.0306276698292666	-0.642652420198571	0.520719195612408	442	-0.0475167443553713	-0.986070760313979	0.324470776946687	432	-0.0615484029817717	-1.97972988291742	0.0478582831378294	1034	-0.0453487992595333	-1.11250252364684	0.266203003331662	603	-0.049799409757112	-1.60111838528192	0.10950999335523	1034	-0.0399245515350907	-0.979282949087345	0.327705686966477	603
cg01604946	`SH3TC2	NM_024577	Body			rs558498895;rs547602791	19;36	0.000200;0.000200		0.157946229510358	3.34107865454571	0.000861730635396791	442	0.0215353818339432	0.446636236855722	0.655337658472821	432	0.110586559182947	2.3292093339029	0.0200451140879871	442	-0.00581012037235614	-0.12048257609948	0.904156619620666	432	0.114386066911476	2.40992995425918	0.0161317483703561	442	-0.00578571744507418	-0.119976529217819	0.904557245902133	432	0.0623095897457997	2.00427696679165	0.0451620244378857	1034	0.176315744790135	4.36807892768089	1.3319000952428e-05	603	0.0309944665941744	0.99600872439463	0.319401887795868	1034	0.124582189341586	3.07011968454243	0.00217780770815571	603
cg01607849	`TPI1;TPI1;TPI1	NM_001159287;NR_027483;NM_000365	TSS1500;TSS1500;TSS1500	chr12:6976392-6977393	N_Shore	rs113502733	48	0.5		-0.0700719650526033	-1.47225473196267	0.141341038358339	442	-0.0624366995995785	-1.29640131937392	0.195242129885648	432	-0.087665428712446	-1.84361813930975	0.0655647891575157	442	-0.100414153048321	-2.08927322579396	0.0369516777947896	432	-0.0839809261140354	-1.76575778044198	0.0777799850376384	442	-0.106026444410763	-2.2069058066612	0.0275561657209892	432	-0.0243936217085889	-0.783794655092961	0.433294843294186	1034	-0.0425858131647582	-1.0446358487147	0.296465251185417	603	-0.0469889050170093	-1.51061959620398	0.13104964761644	1034	-0.0630965076820071	-1.54888754750273	0.121687546539712	603
cg01611622	`SBSN;SBSN;SBSN	NM_198538;NM_001166034;NM_001166035	TSS1500;TSS1500;TSS1500	chr19:36024182-36024803	N_Shelf	rs553908232;rs577288305;rs191846637	29;17;10	0.000200;0.000399;0.000399		-0.0529054245091804	-1.11079068326265	0.267041855238923	442	-0.077964781765415	-1.61999985585222	0.105611657429889	432	-0.0407561547328128	-0.855382138862034	0.392674110253179	442	-0.0794085112793929	-1.65012419109464	0.0992918257090705	432	-0.0394850382992823	-0.828675984102622	0.407615192175677	442	-0.0856314239101775	-1.78005042321967	0.0754160387023767	432	-0.0634400766232639	-2.04073772504745	0.0413943592920858	1034	-0.140128344158295	-3.45804232127577	0.000558719011911796	603	-0.0474526864829113	-1.52555175906816	0.127285081824302	1034	-0.124605778299839	-3.07070709370299	0.00217355282481129	603
cg01634388	`					rs548091329;rs72930118;rs533725893;rs558362802	26;23;3;1	0.000799;0.007588;0.000399;0.000799		-0.0183278647394925	-0.384491589597491	0.700783944652162	442	-0.134745990756067	-2.81124964005352	0.00502646794238357	432	-0.00184276605948496	-0.0386542307197897	0.969183578996152	442	-0.101671446002643	-2.11561394042525	0.0346388218414485	432	-0.00102437759566166	-0.0214875332399248	0.982866485910544	442	-0.105499109295637	-2.19584705207534	0.0283415183930395	432	-0.0903832313324537	-2.91148476899126	0.00362828976025081	1034	-0.100840720668241	-2.48057176582027	0.0132332238672862	603	-0.0845602585866745	-2.72298033140169	0.00651450586532653	1034	-0.0866304816347572	-2.12910927266596	0.0334293128897994	603
cg01643605	`					rs559565154	32	0.000399		0.0334233101432426	0.701354511283889	0.483371117239173	442	0.100071184847531	2.08208909533823	0.0376048812379107	432	0.00404661157665219	0.0848829038570654	0.932392907344076	442	0.0741390573971811	1.54020632993546	0.123900821994083	432	0.00530124141730245	0.111200819801029	0.911507395179827	442	0.0755142556999224	1.56888361846737	0.117062063592593	432	0.113922189334639	3.67567935097596	0.000241799423069129	1034	0.0912684765435428	2.24371811376542	0.0250116324534152	603	0.107873923150328	3.47896031590637	0.00051137126914179	1034	0.0610316136864786	1.49807028518988	0.134397975530462	603
cg01661567	`LETM1	NM_012318	Body	chr4:1843080-1843352	Island	rs138076114;rs201405849;rs201925814;rs142447147;rs577903609;rs200375645;rs537041898	0;1;12;14;19;33;34	0.000396;0.000200;0.001000;0.000399;0.000200;0.001000;0.000200		-0.118727737626563	-2.50225605785443	0.0124938390079235	442	-0.171088169542521	-3.58299642971409	0.000354171735416086	432	-0.0845185857533376	-1.77711644853241	0.0758901306699961	442	-0.171705917953329	-3.59619403935003	0.00033686964845207	432	-0.0852604572571942	-1.79279103188751	0.0733439558312772	442	-0.172295320206348	-3.60878874960269	0.000321099078305464	432	-0.0440691637179651	-1.41662871666856	0.156759042300274	1034	-0.167182640747673	-4.13737095703844	3.69286598443818e-05	603	0.00230626930578302	0.0740884719390359	0.940954293520333	1034	-0.135717719683255	-3.34781756114464	0.000834025190618842	603
cg01685893	`BCO2;BCO2	NM_001037290;NM_031938	5'UTR;Body							-0.0579274460016558	-1.21645822266094	0.224203286454502	442	-0.0714107491354025	-1.48332966018589	0.138383812936002	432	-0.0591197200133555	-1.24155352799878	0.214795491170095	442	-0.0880718766767109	-1.83104139049696	0.0674309409057989	432	-0.0566573989820823	-1.18972975388113	0.23454372110754	442	-0.0893617602457603	-1.85800118105507	0.0634989126298209	432	-0.0629853653511981	-2.02607163227869	0.0428765843435322	1034	-0.0720050205584396	-1.76828503673026	0.0772643243654458	603	-0.0490652373975845	-1.57747550303023	0.114846901368664	1034	-0.0657470218597714	-1.61413653410435	0.106769894575788	603
cg01686861	`					rs78227367	38	0.5		0.00400619161439727	0.0840350338302423	0.93306661828036	442	0.0975721797712856	2.02975753924421	0.0426662447451857	432	0.0309710328383382	0.649861702235894	0.516053590649908	442	0.0911094844052964	1.89454028869511	0.0584742888930829	432	0.0304666696686335	0.639272098052084	0.522914293958671	442	0.089569276730114	1.86233905516585	0.0628843149757796	432	0.116227417016945	3.7507280756738	0.000179981848190292	1034	0.0862787991415369	2.1204227436403	0.0341562482484537	603	0.116607796231138	3.76311555380593	0.000171334190744853	1034	0.0910023123303074	2.23713836870461	0.0254396985510235	603
cg01697487	`MYCBPAP	NM_032133	Body	chr17:48585385-48586167	S_Shelf	rs565502182	1	0.000399		0.0919620953134114	1.93447885162808	0.0533578844662117	442	0.0663306704948925	1.37748463396924	0.168766358557962	432	0.0752818279820378	1.58211828423745	0.113998955687544	442	0.0665814635161252	1.382708258435	0.167158040568254	432	0.0742837382383555	1.56106443243959	0.118887795542984	442	0.0704599258108843	1.46351325392548	0.143725723323556	432	0.0907946380487367	2.92481046529101	0.00347695093950792	1034	0.138988885989982	3.4295532878745	0.000620337308788581	603	0.0629433493587282	2.02471650632754	0.0430157775829251	1034	0.0958839689998312	2.3578680671343	0.0185189612991371	603
cg01708014	`NIN;NIN;NIN	NM_182946;NM_182944;NM_020921	TSS1500;TSS1500;TSS1500	chr14:51296727-51298477	S_Shore					-0.0538067835632175	-1.12975173129769	0.258966431425419	442	-0.102910934976751	-2.14158831687831	0.0324804967733437	432	-0.070023401145025	-1.47123102383702	0.141617673956142	442	-0.116803390032621	-2.43319256958191	0.0151405984656755	432	-0.0693620258490148	-1.45729018638711	0.145426466207928	442	-0.121020684569008	-2.52189870055596	0.0118245185668534	432	0.0339620901662433	1.09144364872053	0.275240159532412	1034	-0.0441125077442753	-1.0821336978027	0.279471128553608	603	0.0183271688863121	0.588821774856238	0.556087580765223	1034	-0.0539532369389379	-1.32396552740844	0.185804254446338	603
cg01715248	`			chr9:93955500-93956420	N_Shore					-0.0151251993082236	-0.317293054657955	0.751162578082187	442	-0.0740257489935679	-1.53784375055252	0.124477868843221	432	-0.025037836752339	-0.525307883513235	0.599595649012759	442	-0.0884377263235578	-1.83868736413131	0.0662959318374727	432	-0.0241046465753407	-0.505721294472009	0.613271198986496	442	-0.0931123049478523	-1.93642705871821	0.0531255776628997	432	-0.0463033843953251	-1.48854939033308	0.13677126512295	1034	-0.10145032644881	-2.49567090622072	0.0126852868008949	603	-0.0430392477931619	-1.3834800330789	0.166685932985399	1034	-0.0940338919262135	-2.31210015831725	0.0209197532337265	603
cg01751802	`KANK2	NM_001136191	TSS1500	chr19:11307495-11308276	S_Shore					-0.0795975048557762	-1.67319098487685	0.0946514421048194	442	-0.0771257743759129	-1.60249657531882	0.109427950530836	432	-0.0699778329185048	-1.47027046985597	0.141877622013971	442	-0.06729090094039	-1.39748567612598	0.162670638608478	432	-0.0669760867111164	-1.4070086210565	0.15981827625758	442	-0.0737473888992839	-1.5320398680431	0.125904345120323	432	-0.100373577738983	-3.23537142036443	0.00122987043336599	1034	-0.07133409750481	-1.75175223409324	0.0800700405154429	603	-0.0893042087734307	-2.87653935249201	0.0040540521515749	1034	-0.0611317083338542	-1.50053332516188	0.133759111519955	603
cg01752594	`DLEU2	NR_002612	Body	chr13:50697984-50702286	N_Shore					0.0209267455415365	0.43902721276907	0.66083412066445	442	-0.121336209091508	-2.5285390649151	0.0116044270826494	432	0.00661900430599658	0.138843433301109	0.889636594241087	442	-0.132381430399767	-2.76132645503163	0.00585734871660495	432	0.0068730549737002	0.144172687621785	0.885429221323533	442	-0.135979909177772	-2.83731430682533	0.00463646902770852	432	-0.0118585589426336	-0.380971180877592	0.703296419540076	1034	-0.0899903559264958	-2.21212510200175	0.0271254255599892	603	-0.0181226693934639	-0.58225009559011	0.560503950088766	1034	-0.0940558305555059	-2.3126427896939	0.020889769739739	603
cg01760983	`IL17RA	NM_014339	Body	chr22:17589440-17590287	N_Shore	rs544644110	1	0.0002		-0.0303335254946568	-0.636476658843274	0.524733170443072	442	-0.0969677181726342	-2.01710343022254	0.0439732451440556	432	-0.000388614829125561	-0.00815165383669981	0.993499687695588	442	-0.0705798709506826	-1.46601292026645	0.143043289496528	432	-0.000264712797737816	-0.00555266261952187	0.995572155524156	442	-0.0751488414095385	-1.56126298046021	0.11884975419908	432	-0.0720495712879126	-2.31859257159378	0.0205023082219663	1034	-0.17557373646923	-4.34930726311705	1.44980176653319e-05	603	-0.0401270622451492	-1.28976466512566	0.197301054115529	1034	-0.152454415441493	-3.76683239296078	0.000171345242473668	603
cg01772439	`FLJ41603	NM_001001669	3'UTR			rs2279133;rs138818164	51;1	0.039836;0.003794		-0.0483989781547524	-1.01601935538966	0.309989567445498	442	-0.136424146852004	-2.84670033561917	0.00450288806649225	432	-0.0669476732608881	-1.40640993103411	0.159995907493779	442	-0.14854579489403	-3.10327250102212	0.00196340463911661	432	-0.0646815676613507	-1.35866888476474	0.174646810494097	442	-0.151459992197798	-3.16509366002662	0.00159320294089793	432	-0.0170488681037388	-0.547743815590698	0.583968046051849	1034	-0.0422677465769084	-1.03682428934558	0.300090781398789	603	-0.0389180363118993	-1.25086423256009	0.211152245336881	1034	-0.0633887437659399	-1.55608057265311	0.119967057158662	603
cg01798157	`BTG2	NM_006763	3'UTR	chr1:203274305-203275338	S_Shore	rs543409078;rs563817102;rs532470883	0;15;41	0.000200;0.000200;0.000599		-0.125789283088741	-2.65262858765905	0.00810645507661779	442	-0.16160299740641	-3.38070854639099	0.000748120117755846	432	-0.109023517278461	-2.29602254525685	0.0218805719322366	442	-0.131057114663614	-2.7333799847321	0.00637479149826135	432	-0.105798000841274	-2.22757378129579	0.0261334648804043	442	-0.135196255428058	-2.82075977526418	0.00488085497023299	432	-0.0874147984240524	-2.81536487198144	0.00490992125882955	1034	-0.0774890021617459	-1.90348220697799	0.0572056283989788	603	-0.0708094261044708	-2.27854889414992	0.0227836409093395	1034	-0.0574322956891409	-1.40952115497408	0.158969079353851	603
cg01804036	`TESC;TESC;TESC	NR_031766;NM_017899;NM_001168325	Body;Body;Body	chr12:117484305-117484627	N_Shore	rs534474421;rs554732576	20;24	0.000200;0.000200		-0.0986039698707809	-2.07507699385355	0.0382457048755076	442	-0.120330232216888	-2.50736959416311	0.0123190492925378	432	-0.0575906675661387	-1.20937025229299	0.226913072154695	442	-0.0790892545466945	-1.64346210203522	0.100662801292863	432	-0.057887790841255	-1.21562361029956	0.224521156896335	442	-0.0818693023417312	-1.70148625591134	0.0892165002198646	432	-0.105600874993303	-3.40509765551761	0.000671166504916263	1034	-0.146078132828467	-3.60695313507429	0.000319463865199048	603	-0.0588904127858035	-1.89403176940896	0.0583545399945214	1034	-0.0922651047661993	-2.26835825525726	0.0234635729548788	603
cg01806956	`									-0.0444489252643544	-0.932983280083737	0.351181632226806	442	-0.0667689657279039	-1.38661374925326	0.165963119888399	432	-0.0523323863970638	-1.0987371609021	0.272264630864247	442	-0.103728327909457	-2.15872102926881	0.0311208720564527	432	-0.0510699962307943	-1.07218606638805	0.284014780365253	442	-0.107618110601969	-2.2402922796723	0.0252981487255694	432	-0.0562161138785459	-1.80783499902873	0.0707746645088933	1034	-0.133440404700713	-3.29095867054483	0.00102101179585838	603	-0.0332922553208453	-1.06990100626662	0.284825048092227	1034	-0.0986042080413769	-2.42519223518776	0.0154263560320969	603
cg01807946	`CSNK1D;CSNK1D	NM_001893;NM_139062	Body;Body	chr17:80206689-80206927	N_Shore	rs185742079;rs566282237	17;30	0.000200;0.000200		-0.0333375316973172	-0.699553200306141	0.484495105035409	442	-0.105991791121114	-2.20617905354982	0.0276071939849794	432	-0.0400525219464315	-0.840598477921159	0.400903522572047	442	-0.116807039053916	-2.43326928394722	0.0151374079633601	432	-0.0384005066481155	-0.805892101359771	0.420626184371798	442	-0.120448159211893	-2.50985094397052	0.0122333136114583	432	-0.0591778389485364	-1.9032975565797	0.0571344932552184	1034	-0.10376922899573	-2.55312444265654	0.0107796306112799	603	-0.0574046938472646	-1.84614147720921	0.0650103629882116	1034	-0.0956834884276442	-2.35290771662798	0.0187669442903248	603
cg01809281	`UBXN2A	NM_181713	TSS1500	chr2:24163185-24163878	N_Shore	rs542535441	8	0.000599		-0.0257530899005893	-0.540320843067616	0.589208002832711	442	-0.0708795317272913	-1.47225806094103	0.141349184015093	432	-0.0138330216474753	-0.290182420003259	0.771806316563287	442	-0.0644071600216829	-1.3374266878737	0.181488258759835	432	-0.0121573592750836	-0.255027484528845	0.798816180855536	442	-0.0677376639080829	-1.40679237194122	0.15989156933476	432	-0.0696911039908491	-2.24244488750515	0.025026553583171	1034	-0.088937271458125	-2.18610011834947	0.0289809089238857	603	-0.0672058028255275	-2.16222932469215	0.0307037967016239	1034	-0.0765870919299414	-1.88123959752754	0.0601713367407224	603
cg01849789	`ZC3H7B	NM_017590	TSS1500	chr22:41697388-41698601	N_Shore					-0.0194643691797989	-0.408339625684589	0.68320407672126	442	-0.0456509752083602	-0.947297195666114	0.343851754913421	432	-0.0067939424262051	-0.142513131328827	0.886739077198413	442	-0.0328917861167217	-0.682304719752377	0.495335906980647	432	-0.00569452968736946	-0.119450753626587	0.904972261112961	442	-0.0339105461265947	-0.703453773473406	0.482069745174381	432	-0.0502163664144029	-1.614546597818	0.106567336637536	1034	-0.0885192731885355	-2.1757714500821	0.029747058858489	603	-0.0481604752822206	-1.54834138807242	0.121702511315957	1034	-0.0757458427919032	-1.8604957783952	0.0630511020536967	603
cg01865484	`SNRNP70	NM_003089	Body	chr19:49610928-49611410	N_Shore	rs112065611;rs560090034;rs145042219	33;10;5	0.004193;0.000200;0.001997		-0.0404886855338267	-0.849762383965263	0.39579022966834	442	-0.0886528499862959	-1.84318351438851	0.065635888398714	432	-0.0379401812925873	-0.79622214618524	0.426221302449554	442	-0.0582140496008474	-1.20851863448209	0.227249342489743	432	-0.0355331656196642	-0.745663902379037	0.456173828668229	442	-0.0622427624650849	-1.29236406359216	0.196635914891656	432	-0.0756645543206863	-2.43536010354692	0.0149492602712816	1034	-0.130930869511105	-3.22834252943344	0.00127140812554656	603	-0.0785369655847473	-2.52818749717495	0.0115279959134294	1034	-0.116716774434571	-2.87444733458771	0.00410508601599305	603
cg01888395	`			chr9:132145576-132146328	N_Shore	rs532446048;rs545731292;rs550152892;rs73623452	1;29;36;45	0.000200;0.000200;0.000200;0.119409		-0.0287673589869912	-0.603595753731816	0.546368127749303	442	-0.10424839726094	-2.16962330980992	0.0302813850375701	432	-0.0148105406472815	-0.310691239796784	0.756173849837325	442	-0.0960045398384068	-1.99694285118071	0.0461254077832703	432	-0.0141450981532558	-0.29672987336382	0.766805215216356	442	-0.0988682109687378	-2.05689441314256	0.0399739424895478	432	-0.048355956525461	-1.55463583434757	0.120194871256714	1034	-0.090846511517081	-2.23328702479275	0.0256931920448685	603	-0.044699285086972	-1.43691116869062	0.150910231080108	1034	-0.0752451235275388	-1.84815012961211	0.0648184708528829	603
cg01890836	`MPRIP;MPRIP	NM_015134;NM_201274	Body;Body							-0.0866742962438326	-1.82266878201595	0.068684431352185	442	-0.143017093923307	-2.98613720714678	0.00288934975722934	432	-0.0924213954322581	-1.94419579980875	0.0521729574378116	442	-0.155279341037995	-3.24620130605875	0.00120485171344079	432	-0.0885372575231174	-1.86204883213969	0.0629177979105239	442	-0.158126451678859	-3.30672653927569	0.000974298018416993	432	-0.0163070428048776	-0.523906226650635	0.60044010679354	1034	-0.115639607549339	-2.84767895833448	0.00446483190704625	603	-0.0304224669856902	-0.977616031081707	0.328418753018421	1034	-0.127405258408255	-3.14044448851287	0.00171934261470166	603
cg01894038	`					rs527670613;rs545422910	6;16	0.000200;0.000200		-0.111543788608153	-2.34953912696084	0.0189884444540701	442	-0.196040974127099	-4.11850493081369	4.08343954590247e-05	432	-0.10304733606744	-2.16923922637819	0.0303050258430995	442	-0.166766680129938	-3.49075161570879	0.000500402302541127	432	-0.102065162157373	-2.14841797748352	0.0319267857808349	442	-0.17191594201988	-3.6006816611972	0.000331169036925413	432	-0.0832409244932697	-2.68029657396601	0.0074042061600263	1034	-0.143707710411942	-3.54759532972598	0.000400182734387355	603	-0.0747155663119316	-2.40470075820453	0.0162613030296653	1034	-0.118125160995928	-2.90945706474356	0.00367434124283579	603
cg01899937	`ACSL1	NM_001995	Body	chr4:185724434-185724647	N_Shore	rs528213308	18	0.000399		-0.0538222228564305	-1.13007652925947	0.258829593212744	442	-0.126312147277323	-2.63332923257393	0.00858186837837646	432	-0.0286037479954988	-0.600160994283904	0.548653395297937	442	-0.108483830672533	-2.25845629948593	0.0241383704528313	432	-0.0306597989759616	-0.643327000322068	0.520281709311078	442	-0.11103962071961	-2.31210060765484	0.0209785187721829	432	-0.023246747004628	-0.746930663416167	0.455234940980224	1034	-0.105680279587719	-2.60049395326911	0.00940468026034993	603	-0.0216133456175801	-0.694431616754238	0.487533976821875	1034	-0.100985253367743	-2.48415148230479	0.0131014581598026	603
cg01901101	`			chr1:9488937-9489249	N_Shore	rs75878045	1	0.005192		-0.107803410173923	-2.27012497277485	0.0234129536816254	442	-0.0630037476953207	-1.30820631809336	0.191208310800646	432	-0.124371926148037	-2.62242531734717	0.0088567174292527	442	-0.0891205788451984	-1.85295978747194	0.0642194202043501	432	-0.123636206344375	-2.60675171467832	0.00927003264875787	442	-0.0920912514178675	-1.91507090926634	0.0557991695374566	432	-0.0847934991338912	-2.73052723994007	0.00636760804861573	1034	-0.178709507297039	-4.42867210497895	1.01064154491488e-05	603	-0.069634293322351	-2.24061095873754	0.0251454193610233	1034	-0.156014170708203	-3.85622752034081	0.000119708119731005	603
cg01901332	`ARRB1;ARRB1	NM_020251;NM_004041	Body;Body			rs566503893;rs570391035	23;1	0.000399;0.000399		-0.158355804131591	-3.34989036055214	0.000835023225616851	442	-0.126658970990912	-2.6406380531208	0.00840005752865654	432	-0.164744692641568	-3.48749665015412	0.000506036048908608	442	-0.136847015438756	-2.85563594685818	0.00437897090635973	432	-0.156569899638406	-3.31147644487265	0.000957369145628617	442	-0.147687493607248	-3.0850751624625	0.00208656379352163	432	-0.0575111396480021	-1.84957234939776	0.0645135615434846	1034	-0.0719085394877972	-1.76590746366158	0.0776628071422777	603	-0.0625977152166711	-2.01356917139938	0.0441753537901232	1034	-0.0787670262724522	-1.93500577702265	0.0532117274248906	603
cg01902066	`					rs569048220	1	0.0002		-0.0222484097897214	-0.466763605781428	0.640872504877873	442	-0.081709652341996	-1.69815338776403	0.0898442476932988	432	-0.0372244808790425	-0.781188252666159	0.435005808098059	442	-0.0938777249260435	-1.9524391124667	0.0511920379032954	432	-0.0351075976214627	-0.736725962260534	0.461589605325184	442	-0.0959604189947107	-1.99601943479341	0.0462260740301103	432	-0.0269947640425123	-0.86741097004856	0.385860813589187	1034	-0.135708755562104	-3.34759367954344	0.000834694621648012	603	-0.0219641447223138	-0.705706305450136	0.480494772839388	1034	-0.124598484154381	-3.07052545546995	0.00217486770148381	603
cg01902845	`PROX1	NM_002763	Body			rs201837366	19	0.001		-0.0722870788245244	-1.51895598294638	0.129157908283313	442	-0.0891169403877186	-1.85288373478973	0.0642303410520511	432	-0.0746779949122713	-1.56938056321034	0.116937431440478	442	-0.101604295790955	-2.11420694941976	0.0347591568493835	432	-0.0721484870118354	-1.5160336152124	0.129895505617117	442	-0.104657589578361	-2.17820210070632	0.0296345739224343	432	-0.045761950861015	-1.47111903424837	0.141424800009484	1034	-0.0336930199543461	-0.82630731217524	0.408869036581932	603	-0.0495460748903623	-1.59295993424265	0.111328986134329	1034	-0.0361985524607811	-0.887806332021776	0.374895776018756	603
cg01903702	`					rs186818352;rs568476664	1;45	0.000200;0.000200		-0.0254161815730917	-0.533249165369089	0.594090629784705	442	-0.0417079289142046	-0.865376043564172	0.387177300512915	432	-0.0444609815314387	-0.933236675246006	0.351050869160388	442	-0.0671102902758285	-1.39372346381208	0.163804368767662	432	-0.0430755734701568	-0.904120328811421	0.366278086967788	442	-0.072051768729573	-1.49669087431091	0.134869370218076	432	-0.0309094536144052	-0.993275084199875	0.320731680774898	1034	-0.0521517323669342	-1.27967643325517	0.200948443425241	603	-0.0412448557714006	-1.32573305426286	0.18509688442328	1034	-0.0544602487202026	-1.33643170453438	0.181697896870934	603
cg01904243	`C14orf43	NM_001043318	5'UTR	chr14:74253387-74254188	N_Shelf	rs549695946;rs116129293;rs146900295;rs549370383	1;29;46;47	0.000200;0.000799;0.000998;0.000200		-0.0654925909376357	-1.3757534292141	0.169292761501423	442	-0.0894580628745799	-1.86001424759155	0.0632130827095057	432	-0.0635566384343301	-1.33497475497427	0.182280297797714	442	-0.100181419535809	-2.08439811909056	0.0373938731472034	432	-0.0604385208886879	-1.26931614352788	0.204723473705088	442	-0.10751318792799	-2.23809108819719	0.025441923703766	432	-0.0344479230993692	-1.10706919547143	0.268427304751353	1034	-0.0917413063374385	-2.25540755627137	0.0242665212288169	603	-0.014592690046306	-0.46881989867637	0.639285498481708	1034	-0.0765092233246109	-1.87931937341717	0.0604332452391811	603
cg01925950	`CDC16;CDC16	NM_003903;NM_001078645	Body;Body			rs555417567;rs573840933;rs116766837	1;9;46	0.000399;0.000200;0.005192		0.00902767116784679	0.189371172606698	0.849887224835179	442	-0.0703000346558863	-1.46018117543666	0.144639297485074	432	-0.00479217397643236	-0.100522258869365	0.919975193525845	442	-0.0960964747508113	-1.99886700577446	0.0459162397702683	432	-0.00353454204642288	-0.0741414882009439	0.940931374433326	442	-0.101806981316959	-2.1184538561177	0.0343970187297757	432	-0.0118658697567673	-0.381206072055743	0.703122172133704	1034	-0.107657896890699	-2.64953384443219	0.00814830921860262	603	-0.0213346736102464	-0.685475216138581	0.493165238500668	1034	-0.112406744992548	-2.76738029919841	0.00572198763635914	603
cg01930719	`FAM65A	NM_024519	Body	chr16:67571252-67572728	S_Shelf	rs201779150	28	0.0002		-0.0842497118803076	-1.77143605425984	0.0768304923134116	442	-0.108848578705897	-2.26611025633318	0.0236636564189692	432	-0.0629274055900137	-1.32172285334892	0.186656235771458	442	-0.094050572053057	-1.95605527483048	0.0507636297779678	432	-0.060722940468922	-1.27530415516768	0.202596904351998	442	-0.0981487830549091	-2.04182985237172	0.0414501396955987	432	-0.0569741947644775	-1.8322664184326	0.0670518244588184	1034	-0.131115009079376	-3.23293561601909	0.00125126972158706	603	-0.032752331851398	-1.05253716090682	0.292713245094826	1034	-0.0967969225879221	-2.38045907914755	0.017425517785707	603
cg01963224	`			chr14:71786855-71788225	S_Shelf	rs369883837;rs562443613;rs574287833;rs116636254	19;22;26;32	0.000399;0.000200;0.000200;0.016773		-0.0759925708959548	-1.59711273707485	0.11061480228896	442	-0.126115396057758	-2.6291832675589	0.00868655984528513	432	-0.0747770100204172	-1.57146918492319	0.116451565140428	442	-0.142017977201931	-2.96498954452483	0.00309397438669999	432	-0.0717999647422684	-1.50868488176993	0.131764771007528	442	-0.14723817030342	-3.07555068342104	0.00215381674638843	432	-0.034715196784352	-1.11566557793293	0.264729042640013	1034	-0.0927714783291318	-2.28087933185849	0.0227093059996915	603	-0.0151672294870502	-0.487280926510694	0.626149512678351	1034	-0.077982971773809	-1.91566564422034	0.055633404916684	603
cg01964337	`CHST11	NM_018413	Body			rs79637479;rs545518717;rs562499340;rs145320686	51;38;2;1	0.117812;0.000799;0.000200;0.000200		0.0128883778231629	0.270363864725723	0.787001350721642	442	-0.160486275612169	-3.35693513533345	0.000814839561406432	432	0.0139478769452122	0.292592109993049	0.769964621375586	442	-0.148846329869085	-3.1096454358558	0.00192187723939822	432	0.0142402659511739	0.29872653212709	0.765282041808933	442	-0.15051069959266	-3.14494948985962	0.00170609712607667	432	-0.058824867721145	-1.89191883045683	0.05863576642843	1034	-0.115459321251142	-2.84319937544155	0.00452775283081633	603	-0.0533464098129941	-1.71536890006176	0.0864284440845121	1034	-0.122994139903185	-3.03058231390156	0.00248239704218219	603
cg01968525	`AMBRA1	NM_017749	5'UTR			rs143526215;rs148063286	46;1	0.001797;0.000200		-0.0388071700788768	-0.814435076789665	0.415719257655351	442	-0.0769987652787915	-1.59984712461081	0.110015013132235	432	-0.0459005555642395	-0.963495206974984	0.335658544518741	442	-0.0915484036370625	-1.90371846671855	0.057265481525374	432	-0.0444995117001191	-0.934046493101197	0.350633174643883	442	-0.0953866537300538	-1.98401167253269	0.0475520505240262	432	-0.0404314912710318	-1.29956026620414	0.193920452004995	1034	-0.0796501677784595	-1.95679295139603	0.0505898474653479	603	-0.0453853858947578	-1.45899679875121	0.144732288976057	1034	-0.0820102413592772	-2.0150313963271	0.0441081520814822	603
cg01971407	`IFITM1	NM_003641	TSS1500	chr11:315739-316539	N_Shelf	rs193238418;rs556114803	39;22	0.000200;0.000200		0.107005730522088	2.25319743054304	0.0244642412256558	442	0.131488043315229	2.74247259999591	0.00620208615379275	432	0.0897719292315015	1.88815503403887	0.0593203767232011	442	0.122721673909279	2.55770296120731	0.0106803017971706	432	0.0904585970597154	1.90267662688765	0.0573943899965441	442	0.121945885450307	2.54137145847605	0.0111893916413289	432	0.105736710906734	3.40951062596895	0.000660444814620813	1034	0.131759581869873	3.24901530164453	0.00118306781723263	603	0.103171390556416	3.32619121706868	0.000892394254198415	1034	0.121174767247449	2.98530499072735	0.00287881850655822	603
cg01978937	`			chr20:2672904-2674698	N_Shore	rs562233000	1	0.001198		0.0156128120503833	0.32752372257859	0.743417520650427	442	-0.0326342443138229	-0.676958480496559	0.498720087423688	432	0.0109288285784754	0.229254169874264	0.818774351525651	442	-0.0517515162871589	-1.07410186172561	0.283164417867105	432	0.0125948708165136	0.264206210081	0.79173935157486	442	-0.055870815985595	-1.15976966413763	0.246540236814604	432	-0.0258675045244194	-0.831172712098644	0.406015972209681	1034	-0.144914279011441	-3.57780383874628	0.000356979735939849	603	-0.0126759428839359	-0.40723339475504	0.683913021242798	1034	-0.136134254585803	-3.35822125734262	0.00080346114106067	603
cg01987516	`			chr10:101282725-101282934	Island	rs532577208	39	0.0002		0.0398585850791382	0.83652391904597	0.403189751990515	442	0.0503573791228272	1.04511686239303	0.296351901096702	432	0.0114444533841868	0.240071360958791	0.810382679715519	442	0.0319653404742842	0.663073308662359	0.507566594704275	432	0.00910815045850183	0.191059459273039	0.848565068654588	442	0.0315458742957946	0.654366292407076	0.513155789449269	432	0.0960271924948628	3.09438504468666	0.00199316341106683	1034	0.14152743404237	3.49303543835847	0.000490842091566202	603	0.0843540598601182	2.71630865831003	0.00664689959117904	1034	0.120506658467159	2.9686833853682	0.00303830223294673	603
cg02003183	`CDC42BPB	NM_006035	Body			rs372316819;rs576598559;rs529371526	1;12;14	0.000200;0.000200;0.000200		-0.0692967381405058	-1.4559140855437	0.145806650624285	442	-0.121325965570972	-2.52832347703285	0.0116115150799378	432	-0.0350513491770279	-0.735544631225955	0.462308090826618	442	-0.0964119014887738	-2.00546900049876	0.0452046312229137	432	-0.0338446341610717	-0.710202287566845	0.477870884561299	442	-0.0948013333869858	-1.97176345216807	0.0489374175910778	432	-0.0812453469106256	-2.6157525358549	0.00895737784742309	1034	-0.0958657865190972	-2.35741818280668	0.0185413334337418	603	-0.0319322900461991	-1.02616593089014	0.304971637076157	1034	-0.0457600757818242	-1.12260605859442	0.261886561311435	603
cg02023728	`USP35	NM_020798	3'UTR	chr11:77921113-77921380	S_Shelf	rs541355309;rs564437874;rs533402049	46;43;33	0.000200;0.000998;0.000200		-0.0627500155239089	-1.31798713668317	0.187903741455615	442	-0.0998018714598022	-2.07644815622678	0.0381246433088595	432	-0.0392010967639603	-0.822710742710391	0.410998293190438	442	-0.0915092043442815	-1.90289874565135	0.0573725894706957	432	-0.0376637978988783	-0.790416382791632	0.429601345072579	442	-0.0945142202307047	-1.96575591893154	0.0496292185315841	432	-0.0522883250506682	-1.68128309287333	0.0928615293767263	1034	-0.123869259746261	-3.05236805620437	0.00231005234483748	603	-0.0515582947702915	-1.65776764825098	0.0975197538780639	1034	-0.113027784297512	-2.78280119065611	0.00545824648757285	603
cg02023773	`C17orf51	NM_001113434	3'UTR			rs181223977;rs9893814;rs564541432	0;9;41	0.000399;0.019369;0.000200		-0.0737874191925984	-1.55059617678246	0.121379080126779	442	-0.122499895054637	-2.55303386455584	0.0108237005827195	432	-0.0654637245463778	-1.37514531546244	0.169481195732386	442	-0.122590818809087	-2.55494804561369	0.0107647056913156	432	-0.0662653769122028	-1.39203418453365	0.164306197264047	442	-0.127718031445644	-2.66296030552993	0.00786594166565595	432	-0.0130329911275697	-0.418705378472469	0.675509925257485	1034	-0.0965901860864867	-2.37534303833966	0.0176680535712891	603	-0.0178228940671438	-0.572616774298726	0.567008397564399	1034	-0.0968155873786944	-2.38092098080664	0.0174037649287653	603
cg02030275	`			chr20:31170740-31173640	N_Shore	rs563064614;rs533538420;rs546279100;rs187324106	48;35;17;1	0.000200;0.001597;0.001198;0.001198		-0.0579123861856272	-1.2161412619816	0.224323966138435	442	-0.111048608672554	-2.31228931269723	0.0209680728614651	432	-0.0392863339977273	-0.824501451826802	0.409980969112706	442	-0.102228460869158	-2.12728576134275	0.0336542375899128	432	-0.035333274074298	-0.741465671001536	0.458713201296825	442	-0.109457917542844	-2.27889813612334	0.0228886099883845	432	-0.0750001393809345	-2.41389411570417	0.0158576404073238	1034	-0.0774008064316993	-1.90130701590496	0.0574901831175188	603	-0.046910590518002	-1.50809820411633	0.131693757850143	1034	-0.0404883078408633	-0.993125983230684	0.320915991446208	603
cg02043679	`ROBO4	NM_019055	TSS200			rs117483938	36	0.086062		-0.0574085203334048	-1.20553682560706	0.228388325953439	442	-0.113946613274532	-2.37315394523849	0.0178268494533356	432	-0.0385820180350657	-0.809705165693313	0.418431836937038	442	-0.119271704996154	-2.48509988338068	0.0131126806308248	432	-0.0380946278073473	-0.799466532803473	0.424339245061176	442	-0.123515772970726	-2.57442319981272	0.0101805580027509	432	-0.0625214045796391	-2.01110807876699	0.0444348902701401	1034	-0.108058327299982	-2.65946606190621	0.00791296846310942	603	-0.0322210937120813	-1.03545323432483	0.300616213716285	1034	-0.0645478097542905	-1.58461217750959	0.113329771309482	603
cg02052217	`PILRA;PILRA;PILRA	NM_178273;NM_013439;NM_178272	TSS200;TSS200;TSS200							-0.0454003959124343	-0.95298185993066	0.340956572866714	442	-0.0665723063280994	-1.38251752552241	0.16721656237746	432	-0.0429921959574628	-0.902368142448745	0.367207414281363	442	-0.068097683715764	-1.41429249831279	0.157678233758082	432	-0.0418704277126615	-0.878795289797737	0.379852676560026	442	-0.0754035388183163	-1.56657459666827	0.117601480328391	432	-0.0433194357652796	-1.39249781686034	0.163939752420819	1034	-0.12449260301314	-3.06788884942476	0.00219403641587786	603	-0.033473638764487	-1.07573440616298	0.282207587430263	1034	-0.10921855386816	-2.68824907530487	0.00726499347701868	603
cg02052726	`DCPS	NM_014026	Body			rs537922482;rs146111241	46;50	0.000200;0.001398		-0.0491002159485489	-1.03076368429561	0.30302356207994	442	-0.0738094002983565	-1.53333280154587	0.125585469699392	432	-0.0712266170093742	-1.49659641568707	0.134884979077208	442	-0.126686428110351	-2.64121670103655	0.00838581176872058	432	-0.0700023412088233	-1.47078709081658	0.141737766901879	442	-0.131910490218238	-2.75138726777733	0.00603686700580307	432	-0.0127217517791195	-0.408705231722223	0.682832697952907	1034	-0.0911468576690515	-2.24071157953144	0.0252064514046334	603	-0.0263603870079358	-0.847017247331634	0.397127210066782	1034	-0.101184428410082	-2.48908472711606	0.0129217737370104	603
cg02106223	`HELT	NM_001029887	TSS200	chr4:185939222-185942747	Island					-0.124183034092669	-2.61840092789334	0.00896123793651492	442	-0.0547561316290879	-1.13658413693704	0.256107470325417	432	-0.098422244877881	-2.0712277418879	0.0386048712505679	442	-0.0587113758704572	-1.21886678053383	0.223296907340443	432	-0.099223843165235	-2.08820803985063	0.0370417970694307	442	-0.0589528143380247	-1.22389074420221	0.221395879325022	432	-0.0815908324150851	-2.62692523655576	0.00866927353331682	1034	-0.0535157345283984	-1.31320896535864	0.189402314759338	603	-0.058318934039745	-1.87560988305099	0.0608445463358421	1034	-0.0192955938347735	-0.473096017667107	0.636295516382711	603
cg02116283	`			chr2:111980804-111981163	N_Shore	rs186035223;rs538784490;rs559001243;rs74388506;rs541440683;rs554963199;rs575229486	50;34;21;15;8;3;1	0.000200;0.000599;0.000200;0.017372;0.000200;0.000200;0.000399		0.00159702096908459	0.0334994229416273	0.973291505579402	442	-0.117369313595713	-2.44509092783052	0.0146527815946318	432	-0.0103687747923775	-0.217505049926121	0.827912562113587	442	-0.108996729718707	-2.26921926687838	0.0234731577210223	432	-0.00734876720352094	-0.154151816321596	0.877559618482742	442	-0.115759707026922	-2.41125365118316	0.0160777136230486	432	-0.0272114753445552	-0.874377885702278	0.382057181545222	1034	-0.116548034719224	-2.87025358148933	0.00415964893985076	603	-0.0365971426105274	-1.17619960857537	0.239681434149646	1034	-0.115578306143574	-2.84615577793646	0.00448613720371846	603
cg02117271	`ANKRD33B	NM_001164440	Body			rs568552373	6	0.0002		-0.0320327926417527	-0.672155489564662	0.501764350309505	442	-0.0813698199955347	-1.69105930755779	0.0911922744069441	432	-0.0205369797941041	-0.430847901822232	0.666767936909924	442	-0.0934905185074687	-1.94433873446512	0.0521626991093126	432	-0.0199110759986723	-0.417713460482708	0.676340218167699	442	-0.0972176414994126	-2.02233527116364	0.0434288186908341	432	-0.056076912682029	-1.8033490528001	0.0714763247311325	1034	-0.100479156326629	-2.47161717522715	0.0135679816934961	603	-0.0655042457410137	-2.10732546256063	0.0351991015244847	1034	-0.110951118860447	-2.73124448672631	0.0063856162893701	603
cg02119755	`PDPK1;PDPK1	NM_031268;NM_002613	Body;Body	chr16:2588034-2588556	S_Shore	rs550395185;rs570544313;rs118111299	36;35;14	0.000399;0.000399;0.008333		-0.0288160209368129	-0.60461734226033	0.545689340755724	442	-0.117821302709385	-2.45459500233101	0.0142731461558069	432	-0.0249668634941299	-0.52381820466441	0.600630887789554	442	-0.103749664465225	-2.15916828679297	0.031086043452158	432	-0.0255692125495915	-0.536461257686172	0.591870549977917	442	-0.106964284465196	-2.22657636239566	0.0262056214083349	432	-0.0507006579952077	-1.6301440594796	0.10322841486022	1034	-0.000253192449289542	-0.00620708932506262	0.995049550744208	603	-0.0604531345902812	-1.94441323204724	0.0519739541141294	1034	-0.00775124711531628	-0.19002796462954	0.849349891199713	603
cg02124446	`C16orf74	NM_206967	5'UTR	chr16:85783862-85785131	N_Shore					-0.0802284108433671	-1.68651003751977	0.092056910112985	442	-0.0911870241114474	-1.89616165659653	0.0582592173458517	432	-0.0692138125615697	-1.45416624074808	0.146290636761027	442	-0.0650827279956973	-1.35149453520971	0.176941697896764	432	-0.069986247154214	-1.47044783700635	0.141829594771236	442	-0.0679702797162569	-1.4116383074974	0.158458830393853	432	-0.0434750227946572	-1.39750544331241	0.16242958533038	1034	-0.0243690967803969	-0.597534052234908	0.550336481390777	603	-0.0304698759531806	-0.979140445718818	0.327665203941484	1034	-0.00353809648786059	-0.0867378635180457	0.930908625113459	603
cg02127888	`CRAMP1L	NM_020825	Body	chr16:1660054-1665095	S_Shore					-0.0272320880338491	-0.571366364839653	0.567995212267456	442	-0.0603320786291305	-1.25259388532929	0.210757318031705	432	-0.0253918661173821	-0.53273879068949	0.594443732704464	442	-0.0632675279413615	-1.3136980724581	0.189352818828996	432	-0.0255450114655832	-0.535953279671325	0.592221391691573	442	-0.0687667213581626	-1.42823123330412	0.153626664489479	432	-0.052485128896436	-1.6876227669844	0.0916367562598896	1034	-0.12819971496019	-3.16024422999345	0.00160732858425994	603	-0.0456108513782018	-1.46625484733905	0.142744919094682	1034	-0.116865225815198	-2.8781369923661	0.00405762004862791	603
cg02129885	`			chr20:30220394-30220662	N_Shore					-0.013105829858119	-0.274925947758549	0.783496133784662	442	-0.0891921938072437	-1.85445672588881	0.0640047783114515	432	-0.0224112048776939	-0.470180127910345	0.638431183661471	442	-0.114333663327911	-2.38128592933241	0.0174400987253474	432	-0.0213493540732368	-0.447895886924196	0.654424235246432	442	-0.117382850728151	-2.44537556121878	0.0146412838689604	432	-0.0336996956382887	-1.08300462956869	0.278968330129081	1034	-0.0634759930821247	-1.55822815709398	0.119457092513637	603	-0.0384042346031854	-1.23433376944534	0.217246483857456	1034	-0.0632845028874801	-1.55351478336773	0.120578563910856	603
cg02148612	`			chr1:248020330-248021252	N_Shore	rs569138388	11	0.01238		-0.156248067724714	-3.30455635002284	0.000981102677378535	442	-0.146339473722791	-3.0565045263357	0.00229430687924193	432	-0.15815609451299	-3.34559360420685	0.00084794875293748	442	-0.162071124368483	-3.39067691783953	0.000721685618267727	432	-0.155855551551071	-3.29611735332499	0.00101078343595478	442	-0.164217165883846	-3.43639503529693	0.000611209514965959	432	-0.00432708594095224	-0.139007451123222	0.889471039072912	1034	-0.145369269029371	-3.58919808917067	0.000341849181532071	603	-0.000529624880405189	-0.0170140720735341	0.986428677530226	1034	-0.139602430667179	-3.44489214519345	0.000586415935662262	603
cg02158978	`FBRSL1	NM_001142641	Body	chr12:133135293-133135722	N_Shore	rs576357081;rs542029308;rs561696837;rs527464400;rs577155294	0;1;17;21;23	0.000200;0.000200;0.000399;0.000200;0.000799		-0.0622721634940151	-1.3079243058642	0.191294751759902	442	-0.0281255415896387	-0.583377502330544	0.559893298202618	432	-0.0521564091605311	-1.09503572826177	0.273882410407403	442	-0.0623156427309169	-1.29388122556583	0.196111290636302	432	-0.0528664036293964	-1.1099698786582	0.26739530489696	442	-0.0626725126478291	-1.30131045266758	0.193557134157417	432	-0.0278645331511199	-0.895373131238184	0.370734526455945	1034	-0.144838661957473	-3.57591032046227	0.000359554096270658	603	-0.0100798474633936	-0.323823615909983	0.746133037868603	1034	-0.105398393104756	-2.59350558079925	0.00959714090357614	603
cg02161701	`KIF7	NM_198525	TSS1500	chr15:90198100-90198833	S_Shore	rs56980214	27	0.006989		-0.0486704160680299	-1.02172652904279	0.307280735908118	442	0.0327556937647723	0.679479604900343	0.497122679031021	432	-0.0531412953967654	-1.11575230224057	0.264912164454293	442	0.0375665793904224	0.779363933684699	0.436086143225038	432	-0.0547351303232692	-1.14928242310386	0.25082715011719	442	0.0360845700383835	0.748590595577895	0.454415333597729	432	-0.0855064714232308	-2.75359858157591	0.00593684483084355	1034	-0.136250469672515	-3.36112414909749	0.000795120530994305	603	-0.0836618010889838	-2.69391195171629	0.00710922637018848	1034	-0.119343818060869	-2.93976002130577	0.00333516566278949	603
cg02186444	`ARMC7	NM_024585	Body	chr17:73124915-73125154	N_Shelf	rs529088435	0	0.0002		-0.0774400427199726	-1.6276549203769	0.103967583569065	442	-0.0454863231967402	-0.943875794329654	0.345596773762583	432	-0.0754325791547651	-1.5852985271917	0.113274458822907	442	-0.0538459106058433	-1.11765357206699	0.264108123394302	432	-0.0741969127006962	-1.55923307081532	0.119320711698141	442	-0.0544810136413639	-1.13086209896508	0.258507805856798	432	-0.0569068543277156	-1.83009608657683	0.0673758741926857	1034	-0.0934308371447995	-2.29718504763013	0.0217587243063187	603	-0.0493919156509729	-1.58799545718118	0.112447479600789	1034	-0.0699561227243153	-1.71780132173404	0.0860915233459587	603
cg02187522	`AVP	NM_000490	TSS200	chr20:3063005-3064146	S_Shore	rs548247247;rs375206234;rs543881116	1;12;16	0.000599;0.006390;0.000200		-0.139307760977364	-2.94127046346443	0.00333754927522856	442	-0.0553157776529546	-1.14822446223376	0.251272425525287	432	-0.138616170973361	-2.9264778977432	0.00349924879307034	442	-0.0867734268213561	-1.80390879042538	0.0715885325757908	432	-0.138893688391367	-2.93241342861829	0.0034335281538711	442	-0.0874948666720768	-1.81898333763581	0.0692533957738844	432	-0.0380199282544502	-1.22196996813195	0.22188663866634	1034	-0.095557600307029	-2.34979305314434	0.0189241373483319	603	-0.0334118941458455	-1.0737486544025	0.283096760851426	1034	-0.0837409743215157	-2.0577542838464	0.0398120934232815	603
cg02194129	`XRCC3;XRCC3;XRCC3	NM_001100119;NM_005432;NM_001100118	Body;Body;Body			rs542250179;rs3212070	7;30	0.000200;0.005435		-0.116227055829421	-2.44906722890923	0.0144890023612077	442	-0.189977522160095	-3.98790486454435	7.08504968413974e-05	432	-0.111150628489216	-2.34118859909642	0.019416425672736	442	-0.18991295986027	-3.98651596170399	7.12609381802532e-05	432	-0.110420036899301	-2.32567315277111	0.0202340661550436	442	-0.195853213572982	-4.11445598472879	4.15477439857204e-05	432	-0.0636733048667499	-2.04826051363542	0.0406510687001299	1034	-0.166109652276382	-4.11031494767077	4.14858072662788e-05	603	-0.0626528797246544	-2.01534829539928	0.0439885330478075	1034	-0.159612859609513	-3.94670389446881	8.26459707377214e-05	603
cg02196651	`LNX1	NM_001126328	TSS200			rs532049430;rs577153977;rs7691817	6;14;19	0.000599;0.000200;0.135982		-0.0948190476320088	-1.99493411021093	0.0463379281946484	442	-0.0991960322753485	-2.06375958977169	0.0393161694412493	432	-0.112597286321436	-2.37191856498619	0.0178819244232528	442	-0.0931102767932557	-1.936384634201	0.0531307806784502	432	-0.111445834040907	-2.34745855078635	0.0190942983946389	442	-0.0950662767416168	-1.97730739895455	0.0483062088876452	432	-0.0200209161590972	-0.643253018436166	0.520174961481064	1034	-0.0779328838855394	-1.91443021630828	0.055791172527793	603	-0.0197290599302958	-0.633873502945498	0.526277008206009	1034	-0.0755914896525504	-1.85668997358716	0.0635916293818955	603
cg02198625	`SIRPB1;SIRPB1;SIRPB1;SIRPB1;SIRPB1;SIRPB1	NM_001135844;NM_001083910;NM_001135844;NM_001083910;NM_006065;NM_006065	5'UTR;1stExon;1stExon;5'UTR;5'UTR;1stExon			rs374175102	26	0.0002		-0.0613073501421012	-1.28760864398791	0.198277775990906	442	-0.106719945364205	-2.22145113322262	0.0265518746169135	432	-0.0313096990222883	-0.656972519629017	0.511473063835666	442	-0.0830688284008741	-1.7265304902868	0.0846117952307356	432	-0.0286422713017386	-0.60096972855003	0.548114890667281	442	-0.0864146752939211	-1.79641335559295	0.072773443669274	432	-0.0665715377716445	-2.1417621412787	0.03231831936323	1034	-0.0952980335769299	-2.34337121624584	0.0192518804222666	603	-0.0301114628231963	-0.967615936936399	0.333389857277801	1034	-0.0462112462619774	-1.13369007822857	0.257207189321277	603
cg02203635	`IQCE;IQCE	NM_001100390;NM_152558	TSS1500;TSS1500	chr7:2598550-2599203	N_Shore	rs551179700	21	0.0002		-0.0389610604962238	-0.817667997516774	0.413871190704055	442	-0.0724938990834571	-1.5059072249586	0.132485692517029	432	-0.0416483701434573	-0.87412923402151	0.38238711742528	442	-0.0894236688523156	-1.85929528651563	0.0633150436149001	432	-0.0408371411578092	-0.857083756560795	0.391733518294667	442	-0.0915078282155262	-1.90286996866515	0.0573763526120397	432	-0.0876239217960012	-2.82213476440159	0.00480775188561749	1034	-0.0677101106912843	-1.66247751212467	0.0966832860916937	603	-0.0665855518530698	-2.14221434471977	0.0322818767199521	1034	-0.0407808312760463	-1.00030914405305	0.31742932534257	603
cg02210147	`THUMPD1	NM_017736	3'UTR			rs8044864	15	0.380591		-0.0424024688367711	-0.889975328773125	0.373822258087275	442	-0.0952746995695695	-1.98166885022333	0.0478144584339519	432	-0.0512483410775728	-1.07593687631143	0.282334332739055	442	-0.107227633209649	-2.23210063916152	0.0258367909762611	432	-0.0488628003540483	-1.02577163588447	0.30537031177706	442	-0.110871843077575	-2.308578130582	0.0211743431955274	432	-0.0386979562607089	-1.24378355047232	0.213747344525591	1034	-0.034688942899898	-0.850751240850975	0.395151569034872	603	-0.0425400521276941	-1.36741407736166	0.171663991886673	1034	-0.0386346277266262	-0.947611207901809	0.343588201983348	603
cg02217815	`FOXRED2;FOXRED2	NM_001102371;NM_024955	Body;Body	chr22:36893976-36894232	N_Shelf	rs557602497;rs1000427;rs145908697	0;26;36	0.000399;0.091454;0.000200		-0.0731151359776519	-1.5364177506631	0.124818284292729	442	-0.0717830213211086	-1.49108903606886	0.136334339017178	432	-0.0470033629766851	-0.986677916075685	0.324164600392637	442	-0.0803625450038189	-1.67003451870934	0.0952832645934598	432	-0.0463516227407966	-0.972977045767842	0.33092608874953	442	-0.0820208674189251	-1.70465042362854	0.0886238052344316	432	-0.0730866208568493	-2.35208390955087	0.018749959878378	1034	-0.144575162828537	-3.5693123987942	0.000368660784700879	603	-0.0393759524753845	-1.2655972563797	0.205825751713064	1034	-0.0943457955869087	-2.31981501471156	0.0204969713624963	603
cg02222982	`CORO1B;CORO1B	NM_001018070;NM_020441	Body;Body	chr11:67203319-67203662	S_Shelf	rs186718881;rs148334197	29;47	0.000200;0.000221		-0.141539238322927	-2.98901990837171	0.00286097962363246	442	-0.121037304406558	-2.52224846012694	0.0118128341498895	432	-0.0885875759741767	-1.86311266483461	0.0627677514285751	442	-0.0384439657790202	-0.797584123507402	0.42543804219921	432	-0.0854559928926481	-1.7969227256234	0.0726845818532858	442	-0.043699178710314	-0.906742928331995	0.364897925659382	432	-0.0736857441108782	-2.37143481388645	0.0177984147352689	1034	-0.0999565101140548	-2.4586743528092	0.0140650659290282	603	-0.0388892044585459	-1.24993661233722	0.211490918503725	1034	-0.0602816386402215	-1.47961652449082	0.139259885630735	603
cg02224374	`ZNF816A	NM_001031665	TSS1500	chr19:53465730-53466323	S_Shore	rs545204499	48	0.000399		-0.0856647530853445	-1.8013340095302	0.0719859580936044	442	-0.0600980876273621	-1.2477240874343	0.21253570085018	432	-0.0686816424328452	-1.44295002616462	0.149425793518606	442	-0.072383414742293	-1.50360408750612	0.133078282383034	432	-0.0652075612585245	-1.36974895327412	0.17116025256752	442	-0.0745989294103522	-1.54979547427237	0.12158015896475	432	-0.0340891328676551	-1.09552959508588	0.27344735920982	1034	-0.130957563763816	-3.22900836373606	0.00126847033049822	603	-0.0172788432263091	-0.555133887607866	0.578904498377748	1034	-0.102061030794859	-2.51079914891101	0.0121565463088377	603
cg02233614	`PFKFB2;PFKFB2	NM_006212;NM_001018053	5'UTR;5'UTR	chr1:207226281-207226842	S_Shore	rs57639876	23	0.000799		-0.0190590211260762	-0.399833817296655	0.68945512531423	442	-0.0738412104959672	-1.53399604664545	0.125422138632315	432	-0.0337892522311007	-0.709039256377124	0.478591923108488	442	-0.105207802964207	-2.18973859547046	0.0287835404135765	432	-0.0328791573444628	-0.689927707491863	0.490525216600189	442	-0.108423166663426	-2.25718337143326	0.0242181165489435	432	-0.0256844268249579	-0.825287475356232	0.409347624486963	1034	-0.0887719789169466	-2.18201567460973	0.0292818245793816	603	-0.0333864645046304	-1.07293082106538	0.283463519141346	1034	-0.0862969338456358	-2.12087065635315	0.034118436549961	603
cg02243303	`MCM3	NM_002388	Body	chr6:52149149-52149725	N_Shore	rs560608396;rs572970722;rs544790097	3;12;45	0.001398;0.000200;0.000200		0.122078315441937	2.57357230539387	0.0102022864820812	442	0.113257323754264	2.35867365893077	0.0185341726446394	432	0.0739188060793703	1.55336728578476	0.120715654116977	442	0.0980849555283433	2.04049343098808	0.0415833012569818	432	0.0753502262084032	1.58356120249777	0.113669790507071	442	0.0977301513253476	2.03306484475663	0.0423301161413893	432	0.106307249708152	3.42804741246012	0.000617125273316858	1034	0.165172633802871	4.08669561207058	4.58960805030277e-05	603	0.0614612799769113	1.97692044992102	0.0481753319430375	1034	0.0986782475529873	2.42702517075855	0.0153489351121158	603
cg02257517	`SLC2A6;SLC2A6	NM_001145099;NM_017585	Body;Body	chr9:136340048-136340263	Island	rs587636491	18	0.0002		-0.134169051150816	-2.83142590999879	0.00472008669389683	442	-0.0828823414878771	-1.72263660615207	0.0853148310658726	432	-0.130418495894543	-2.75135207504561	0.00603517210201866	442	-0.0899493332734633	-1.87028408648137	0.0617714172511592	432	-0.128417854812624	-2.70867139705295	0.0068636727221491	442	-0.0927054881988104	-1.92791767338791	0.0541777479435648	432	-0.0765577007745712	-2.46421939724574	0.0138004344303072	1034	-0.114650307397048	-2.82310008934504	0.0048200826479582	603	-0.0674274381200423	-2.16938171591515	0.0301561698939238	1034	-0.0972740337867515	-2.39226678417524	0.0168768743937617	603
cg02279625	`SH2D7	NM_001101404	TSS1500			rs542714902	45	0.0002		-0.0933590680836476	-1.96403577993875	0.04982192026736	442	-0.111165389571595	-2.3147412009492	0.0208327587060645	432	-0.0867318525692792	-1.82388523830082	0.0685000037224053	442	-0.103224960215552	-2.1481700001156	0.031952274997175	432	-0.0866170221245515	-1.82145830231379	0.0688683582011114	442	-0.105962088382485	-2.20555612830916	0.0276509969971448	432	-0.0623387422638505	-2.00521713624624	0.0450613568160988	1034	-0.123820138609452	-3.05114507931317	0.00231942882566834	603	-0.0553891856434848	-1.78118714935092	0.0750268884693803	1034	-0.105132524060018	-2.58691468853934	0.0097818672638729	603
cg02295216	`CKLF;CKLF;CKLF;CKLF;TK2;CKLF	NM_181640;NM_016326;NM_001040138;NM_181641;NM_004614;NM_016951	TSS1500;TSS1500;TSS1500;TSS1500;TSS1500;TSS1500	chr16:66586268-66586719	N_Shore					-0.0638047545624723	-1.34020047431251	0.180575802407006	442	-0.0715890449071526	-1.48704587819115	0.137399306939377	432	-0.0603594915736765	-1.26765234101197	0.2053172277729	442	-0.0823376546769561	-1.71126412928746	0.0873952216083712	432	-0.0586024481258628	-1.23066541785965	0.218841669873213	442	-0.0851856467346489	-1.77073866508632	0.0769545599181031	432	0.000267399866152449	0.00859015587549067	0.993147791679207	1034	-0.043424451449614	-1.06523341419336	0.287046564387338	603	-0.00184890428184278	-0.0593956680966195	0.952648435531036	1034	-0.0391601275350063	-0.960513515628142	0.337059582007749	603
cg02301079	`					rs528627517	4	0.0002		-0.0523337953354336	-1.09876679620643	0.272251704684287	442	-0.0983280060480647	-2.04558251560428	0.0410781542271171	432	-0.0398012653357972	-0.835319659500851	0.403866954555194	442	-0.112508947652358	-2.34295470057657	0.0193297205781704	432	-0.039030063904543	-0.819117629609988	0.413044106061887	442	-0.116659517950684	-2.43016796056164	0.0152668634899968	432	-0.0655529521244887	-2.10889689099452	0.0350630227833114	1034	-0.122664961978692	-3.02238880147853	0.00255020583977573	603	-0.0355326247927845	-1.14195769167784	0.253636572094563	1034	-0.0862016870912744	-2.11851815332887	0.0343174296402713	603
cg02308798	`C2orf67	NM_152519	5'UTR	chr2:211035478-211036637	N_Shore	rs114240756	6	0.016573		-0.0446442915040837	-0.937089465229248	0.349066466912835	442	-0.0809113068427148	-1.68148836318476	0.0930367050643393	432	-0.0373752674330649	-0.784355584760804	0.433146443028722	442	-0.106264601219131	-2.21190060715339	0.0272076592587416	432	-0.0364276569081073	-0.764451233087165	0.444907455409277	442	-0.111352797042601	-2.31867607314626	0.0206171945963124	432	-0.0694096361337643	-2.23335884951236	0.0256202658106775	1034	-0.0905124829212319	-2.22503032003436	0.0262440223673473	603	-0.051165003590889	-1.64509984669148	0.100105527822032	1034	-0.0703251771080135	-1.72689353231438	0.0844441275194311	603
cg02310103	`CYB561D2	NM_007022	3'UTR	chr3:50387959-50388681	S_Shelf	rs587676191;rs193294004	37;2	0.000200;0.003395		-0.0301560206459509	-0.632749876654926	0.527163067782728	442	-0.111718504679006	-2.32635507653979	0.0202021177364855	432	-0.0436512134348695	-0.916217802810249	0.359901951810091	442	-0.142365738523864	-2.97234968810523	0.00302130282720116	432	-0.0416031911803425	-0.873179907192099	0.382904026879662	442	-0.14713537307858	-3.07337183228188	0.00216947879082503	432	-0.0150725563472601	-0.484238879470465	0.628306084661463	1034	-0.0845405102743464	-2.07749490673457	0.0379503416874139	603	-0.0198782075929145	-0.638666715165278	0.523154114526761	1034	-0.0897880417796146	-2.2071249077976	0.0274737399932425	603
cg02310296	`MMP9	NM_004994	TSS200	chr20:44639135-44639988	N_Shore	rs546953474	40	0.000599		-0.0623898340244628	-1.31040221077787	0.190455583794639	442	-0.068297907925433	-1.41846383654947	0.156457343502351	432	-0.0776708378864946	-1.6325254159366	0.10293756594673	442	-0.12285393649331	-2.56048760009785	0.0105955864821152	432	-0.0784494042301961	-1.64895688541879	0.0995224468730327	442	-0.125826281562661	-2.62309139188527	0.0088424618077328	432	-0.0425148059569389	-1.36660158079892	0.171918671096249	1034	-0.125015207854196	-3.08090321445277	0.00210090225199444	603	-0.0326931031350644	-1.05063241323942	0.293587397442186	1034	-0.104505673007943	-2.57137652711415	0.0102299710368959	603
cg02311864	`TNFRSF21	NM_014452	Body			rs531454220	1	0.000799		-0.0271234133601039	-0.569085100638999	0.569541429433801	442	-0.126830591614522	-2.64425495693622	0.00831136723926977	432	-0.0252517050142925	-0.529796860238172	0.596480977945364	442	-0.123889125319532	-2.58228551039811	0.0099528528490311	432	-0.0254555447133446	-0.534075388117157	0.593519210922572	442	-0.127316813841732	-2.65450295775918	0.00806461277290649	432	-0.0595270747029745	-1.91455633182253	0.0556806677141979	1034	-0.0391883795487045	-0.961207186780692	0.336710857402892	603	-0.0553571627849393	-1.780155258837	0.0751956574090095	1034	-0.0352797633121946	-0.865253130657577	0.387146615156365	603
cg02315870	`HNRNPA2B1;HNRNPA2B1	NM_031243;NM_002137	Body;Body	chr7:26239418-26242062	N_Shelf	rs73281546;rs549152114	34;12	0.022164;0.000200		0.0568619503744191	1.19403432797717	0.232855948846796	442	0.0875204393148376	1.8195177152873	0.0691717808324993	432	0.0337992763096874	0.709249763633752	0.478461371906144	442	0.0957665561749865	1.99196212387911	0.0466705791216215	432	0.0328187063792281	0.688658307598197	0.491323465370395	442	0.0968442415903486	2.01451869263864	0.044244335506554	432	0.0907742561252612	2.92415025966284	0.00348431137215392	1034	0.105513534789349	2.59636005843015	0.00951810763117918	603	0.0603056493709007	1.93965796910898	0.0525501067499416	1034	0.0745010077436421	1.82980506407293	0.0675200885319453	603
cg02315926	`KIAA0247	NM_014734	Body			rs377173121	1	0.0002		-0.0973165716703778	-2.04781064371906	0.0408522614625512	442	-0.0687600018457214	-1.4280912325489	0.153666960724024	432	-0.0736643754600891	-1.54800108402448	0.122002951925009	442	-0.0297635754257686	-0.617372983523061	0.537255430782921	432	-0.0740429037395355	-1.55598470584539	0.120091634776788	442	-0.0343886524150113	-0.713379572091786	0.475910931320891	432	-0.041048960340989	-1.31942928847631	0.187194395255727	1034	-0.0841769318439596	-2.06851778713119	0.0387875861980802	603	-0.0298086818489094	-0.95788043305051	0.338275851704131	1034	-0.0584843820640348	-1.4354003043516	0.15145988105608	603
cg02319782	`					rs529466927;rs56020502;rs543993002	0;45;47	0.000200;0.286142;0.000200		0.135160310296133	2.85260277253781	0.00441875591742601	442	0.0847678627198226	1.76201229770884	0.0784195155079573	432	0.0975895742490628	2.05359210124685	0.0402873274686215	442	0.0411697156146814	0.854196217041609	0.393338223551968	432	0.098109380340469	2.06460105148078	0.039229918112398	442	0.0406399463104169	0.84319227482055	0.399459918285065	432	0.129066987022309	4.16950157597408	3.14556924142931e-05	1034	0.1501714819367	3.70955414253951	0.000214772215749328	603	0.108333554589023	3.49390046115916	0.000483706177031912	1034	0.128226159145416	3.16090335218091	0.00160371802267462	603
cg02338840	`					rs559826274;rs555274936	19;9	0.000200;0.000200		-0.061408305247619	-1.2897342987775	0.197538508016541	442	-0.0962343848691409	-2.00175346422122	0.0456039634705712	432	-0.0893990853729544	-1.88027092073906	0.0603883359808056	442	-0.0787272407263968	-1.63590818907067	0.102235529448396	432	-0.0900567475347258	-1.8941781274419	0.0585151189289305	442	-0.0797714097818611	-1.65769738757477	0.0977515155173882	432	-0.0111335403748566	-0.357677056153339	0.72065261271646	1034	-0.0989932217498716	-2.43482303160054	0.0150233762863965	603	-0.0369211577834293	-1.18662260121251	0.235543181900824	1034	-0.133471426014224	-3.29173295782285	0.00101822344212243	603
cg02339793	`SLC38A10;SLC38A10	NM_001037984;NM_138570	Body;Body			rs555326012;rs567115975;rs73358108;rs552745818	43;39;36;24	0.000200;0.000200;0.033147;0.000200		-0.0390801323590875	-0.820169478759252	0.412444589795533	442	-0.0933803910581978	-1.94203497078824	0.0524415553715195	432	-0.00847332785329027	-0.177742278405328	0.859005508405627	442	-0.0763285087724598	-1.58586621917916	0.113154255978539	432	-0.00947057896418702	-0.19866247991024	0.842616214368703	442	-0.0736571066611624	-1.5301575107005	0.126369718250991	432	-0.0646779924910069	-2.08066933819821	0.0375770152677908	1034	-0.118726409440291	-2.9244065130442	0.00350327575711755	603	-0.0493757985077597	-1.5874764320946	0.112564925611542	1034	-0.10188540589951	-2.50644841034927	0.0123065676021989	603
cg02348119	`TBC1D16	NM_019020	5'UTR			rs556316191;rs574827199	1;16	0.000200;0.002995		-0.043683858205838	-0.916903873539573	0.359542452269498	442	-0.0717260899681457	-1.48990237261323	0.136646242749323	432	-0.0387926365666408	-0.814129759630726	0.415894040946526	442	-0.0939288262025027	-1.9535081980995	0.0510650685221411	432	-0.0360017254504998	-0.755505086416285	0.45025234942148	442	-0.0950486026515397	-1.97693755938257	0.0483481029496432	432	-0.0587153385462727	-1.88838803725206	0.0591082180236473	1034	-0.0871443786237473	-2.14180344621652	0.0323908410486406	603	-0.0642221409224233	-2.06596413451959	0.0389464071859004	1034	-0.0927175617899852	-2.27954608365781	0.0227886046620696	603
cg02352252	`					rs185617222;rs139992452	1;39	0.000599;0.002995		0.0121273950276503	0.254398856488825	0.799301468394281	442	-0.102710838554769	-2.13739470230934	0.0328209525832317	432	0.01074446286632	0.225386427859022	0.821779941861054	442	-0.109181699295861	-2.27310107294387	0.0232371790805416	432	0.0120304085054609	0.252364153171773	0.800872747508184	442	-0.11210133109275	-2.33439421492025	0.0197754141470788	432	-0.0307300373205713	-0.987505899478634	0.323549992861129	1034	-0.148002613671431	-3.65517497731751	0.000265399561442859	603	-0.037879065679728	-1.21743826577201	0.223605056598515	1034	-0.16899852606267	-4.18318232143506	3.02777793007805e-05	603
cg02354658	`GLRX;GLRX	NM_001118890;NM_002064	3'UTR;3'UTR			rs558796682	21	0.000399		-0.118418604399945	-2.49567915594265	0.0127265756496496	442	-0.0563196749391297	-1.16910678255395	0.24275910251707	432	-0.075205192183663	-1.58050160520111	0.114368651980238	442	-0.0283583646473242	-0.588209277896279	0.556647742793001	432	-0.0741970817163937	-1.55923663574413	0.119319867783808	442	-0.0300010194294598	-0.622301127798348	0.534012366192148	432	-0.0782590554638	-2.51920449027701	0.0118256177841891	1034	-0.138843601665237	-3.42592151389843	0.000628632080511925	603	-0.0459545843601913	-1.47732037989216	0.13975541732906	1034	-0.106494549639907	-2.62068325139442	0.00886787625392206	603
cg02355304	`MIR589;FBXL18	NR_030318;NM_024963	TSS1500;Body	chr7:5539957-5541567	N_Shelf	rs544503858;rs138023232;rs192049463	49;48;19	0.000200;0.001597;0.010583		-0.139159302661812	-2.93809481246414	0.00337167715984956	442	-0.114983834375381	-2.39494777079166	0.0168069181889968	432	-0.113341877624808	-2.38773914899348	0.0171342127358883	442	-0.0773055865779807	-1.60624760513189	0.108601044601091	432	-0.111490454950292	-2.34840630283681	0.0190460155222035	442	-0.0847116993613242	-1.76083924603357	0.0786181651878947	432	-0.101843453745508	-3.28307854524835	0.00104015566108941	1034	-0.176523968615646	-4.37334757885087	1.30049024896732e-05	603	-0.0594092735316251	-1.91075856717981	0.0561675811178759	1034	-0.128556030054786	-3.16912577771707	0.00155930058878982	603
cg02364408	`C19orf44	NM_032207	Body	chr19:16629929-16630156	N_Shelf	rs537596383;rs374293505;rs571186605	32;22;19	0.000200;0.000599;0.000200		-0.0468829637285797	-0.984146822466858	0.325406884407391	442	-0.111162707877766	-2.31468489638176	0.0208358574586223	432	-0.0426177125211448	-0.894498492248432	0.371399446824114	442	-0.118160972169621	-2.46173798215693	0.0139935680610068	432	-0.0431970112247128	-0.906672377342248	0.364927157666873	442	-0.115188674680261	-2.39925244451695	0.0166116411843501	432	-0.0377232949558049	-1.21242700840577	0.225516385886365	1034	-0.0704823388658044	-1.73076559277458	0.083750352886956	603	-0.0327054439041121	-1.05102928179263	0.293405116848225	1034	-0.0768947155791117	-1.88882576022257	0.0591458180294884	603
cg02371935	`ZCCHC14	NM_015144	Body			rs11866207	14	0.022364		-0.0387431352008663	-0.813089847286903	0.416489679873446	442	-0.0736193755074812	-1.52937083502482	0.126564604085497	432	-0.0227257053854999	-0.476780508077414	0.633725909608363	442	-0.0810137566973793	-1.68362682606741	0.0926220194698047	432	-0.0229670337503	-0.481845298189021	0.630125340543597	442	-0.0819799144411857	-1.70379545574844	0.0887836391304564	432	-0.00490815019059054	-0.157674397382213	0.874743721543281	1034	-0.067818042150118	-1.66513569064128	0.096151562041945	603	0.0039347628131147	0.126403950816566	0.899436538777187	1034	-0.0617417753076381	-1.5155459661488	0.129915848246783	603
cg02381279	`			chr19:16394450-16394662	N_Shore	rs559296367	31	0.0002		-0.028588944818387	-0.59985022609017	0.548860393253113	442	-0.087092231208603	-1.81056999983235	0.0705488259961925	432	-0.00697368559891582	-0.146283634610169	0.883763544709629	442	-0.0827565644889643	-1.72001042565263	0.0857916489080748	432	-0.00502536976925954	-0.10541393297898	0.916095047124984	442	-0.0873179861207076	-1.81528722658852	0.0698200693309809	432	-0.063078525374471	-2.02907631304804	0.0425693135731098	1034	-0.126641959661241	-3.12142511112826	0.00183366561137448	603	-0.0287752002060966	-0.924651572687453	0.355296930105648	1034	-0.0876167953535585	-2.15347399384568	0.0314606365499642	603
cg02389949	`C7orf41	NM_152793	Body	chr7:30174230-30176169	S_Shore	rs182797840;rs10233683;rs533208830	0;41;44	0.000200;0.227835;0.001997		-0.0568343473298472	-1.19345344438096	0.233083201610517	442	-0.11175306810229	-2.32708086026683	0.0201632668119981	432	-0.0465536055449142	-0.977223035013333	0.32882096060746	442	-0.121049584943795	-2.52250690132234	0.0118042069929247	432	-0.0445921440994634	-0.935993430070755	0.349630259083418	442	-0.125355314368204	-2.61316869693383	0.00910176438276596	432	-0.0760786093126151	-2.44873853254895	0.0144066088500976	1034	-0.124476909856713	-3.06749807129028	0.00219689061105	603	-0.0618467778032627	-1.98935172801297	0.0467857064413365	1034	-0.105438810258966	-2.59450755453015	0.00956933233029582	603
cg02390801	`CCDC33	NM_025055	TSS200			rs545552428;rs115078625	0;42	0.000200;0.010184		-0.0671842336960201	-1.41139448434144	0.158521541705714	442	-0.126672022807226	-2.64091311446938	0.00839328308045857	432	-0.0464966592125855	-0.976025927424009	0.329413595524776	442	-0.100133738506672	-2.08339936518562	0.0374850192499296	432	-0.0457557507345114	-0.960451362494188	0.33718695391206	442	-0.101683804718861	-2.11587289336269	0.0346167133655157	432	-0.0456086933080324	-1.46618537534046	0.142763841798347	1034	-0.12250993281886	-3.01853022950632	0.00258272262976709	603	-0.0118752125798227	-0.381506250272343	0.702899516085342	1034	-0.0721462110480531	-1.7717644392647	0.0766841811738108	603
cg02393525	`NAGLU	NM_000263	TSS200	chr17:40688033-40688745	N_Shore	rs559711162;rs527668280;rs549437277	44;29;4	0.000200;0.000200;0.000200		-0.0512729026446939	-1.07645344144295	0.282103429736877	442	-0.0933466084260478	-1.94132827916854	0.0525273456875827	432	-0.035354186601238	-0.741904884523827	0.458447164426942	442	-0.0965439560769601	-2.00823307066581	0.044909477033906	432	-0.0312878248722499	-0.656513233664598	0.511768275650147	442	-0.0999402464414044	-2.07934646935956	0.0378568308025295	432	-0.0336598426625506	-1.08172290852424	0.279537557844319	1034	-0.139898216945701	-3.45228787473259	0.000570685501730789	603	-0.00636682605577847	-0.204535502429286	0.837974302037744	1034	-0.108825274127001	-2.67849173017044	0.0074791100171068	603
cg02394698	`ARHGAP24	NM_001025616	Body			rs527252132;rs549007293	46;1	0.000200;0.000998		0.00344834811435682	0.0723334469872713	0.9423693014858	442	-0.0802143674531141	-1.66694190791379	0.0958972503632292	432	-0.00986112709771088	-0.206855452234814	0.836215822240317	442	-0.107204571090368	-2.23161685159797	0.0258689106982709	432	-0.00796518240844232	-0.16708260927536	0.867380418932645	442	-0.110111171291993	-2.29260955355593	0.0220822082771244	432	-0.0253851110513699	-0.815665755252256	0.414829426288001	1034	-0.0746661909022493	-1.83387723129134	0.0669125212405322	603	-0.0327443921109108	-1.05228182483804	0.292830325760864	1034	-0.0829015857211075	-2.03703255886842	0.0418492483538525	603
cg02412345	`XPO7;XPO7	NM_001100161;NM_015024	Body;Body	chr8:21776842-21777942	S_Shelf					-0.0576100641140589	-1.20977847210723	0.226756374803934	442	-0.112661618758785	-2.34616119983609	0.0191650537444486	432	-0.0613026046131845	-1.28750872540955	0.198312575817879	442	-0.101121194436989	-2.10408515085157	0.0356354183496521	432	-0.0634057717127371	-1.33179734338345	0.183322511013236	442	-0.105873308669383	-2.20369426557713	0.0277822778315026	432	-0.0432843287679724	-1.39136789444503	0.164281966029489	1034	-0.106364302928329	-2.61745363138084	0.00895186305837724	603	-0.0444420848093744	-1.42863222577516	0.153277193459785	1034	-0.113822341094112	-2.8025338566314	0.00513679663480433	603
cg02416781	`									-0.0291707750285462	-0.612064987563584	0.540753498272696	442	-0.126457384079116	-2.63638981400314	0.00850531042012417	432	-0.0265990241249994	-0.558077476716124	0.577030407206602	442	-0.124396415501123	-2.59296956019958	0.00965070815127064	432	-0.0261288132940769	-0.548207390669629	0.583784716219276	442	-0.131055016620524	-2.73333571848109	0.00637564278617239	432	-0.0409905511780814	-1.31754974576515	0.18782317870144	1034	-0.13510741319701	-3.33257623976154	0.00088075453882806	603	-0.0416364007828054	-1.3383329808733	0.180956615985133	1034	-0.138380974807677	-3.41435790091933	0.000655735686063411	603
cg02417427	`SERINC5	NM_178276	Body			rs550805843;rs535850602;rs374019037;rs145252119	6;12;15;39	0.000200;0.001198;0.000399;0.000799		-0.0570998919654748	-1.19904169095523	0.230903495679835	442	-0.120516855293439	-2.51129643909447	0.0121836131635008	432	-0.0345806683624048	-0.725659564754285	0.468344612620175	442	-0.103209672141988	-2.14784956602946	0.031977820077844	432	-0.0299322186709932	-0.628051125480128	0.530234869248684	442	-0.108199756994418	-2.25249565658336	0.024513766106846	432	-0.0691822699428118	-2.22601952296354	0.0261087045011148	1034	-0.131914723873181	-3.25288593014403	0.0011671721555678	603	-0.0433493843018047	-1.39346171639212	0.163648246280953	1034	-0.106712785344384	-2.62609486490249	0.00872872454918527	603
cg02419321	`ITGA5	NM_002205	Body	chr12:54811981-54812202	N_Shore	rs111500291;rs561815741	38;41	0.002396;0.001398		-0.126917662317981	-2.67668168528696	0.00755025996985977	442	-0.121477167365014	-2.53150576582931	0.0115072789032975	432	-0.0921493050026226	-1.93843935753503	0.0528722338300816	442	-0.0841626136730409	-1.74937140103339	0.080581851955531	432	-0.0911070856944818	-1.91639247927651	0.055623353702782	442	-0.0853569244613452	-1.77431636980858	0.0763604362232671	432	-0.0839003413602539	-2.70162916917423	0.00694675899291438	1034	-0.155827615746581	-3.85154011212003	0.000122002854053357	603	-0.050604290979971	-1.62704032939132	0.103886107940222	1034	-0.09645112551465	-2.37190186774946	0.0178328499398594	603
cg02426324	`C7orf10	NM_024728	Body			rs146035598	49	0.004992		-0.135800935045979	-2.86629189499149	0.00423337132851442	442	-0.176659167147236	-3.70212081604608	0.000224062887167137	432	-0.137185436427806	-2.89588477291848	0.00385652332474207	442	-0.163304889020346	-3.41695635800954	0.00065610277765492	432	-0.137478028588479	-2.90214021558536	0.00378087976088289	442	-0.164005999729975	-3.43189500309321	0.000621340095453554	432	-0.0642880837344583	-2.06809131384695	0.0387457315614505	1034	-0.0692385787225235	-1.70012489259677	0.0893686053791553	603	-0.0747350848156811	-2.40533130629201	0.0162333310761409	1034	-0.0934199046036816	-2.29691467318087	0.0217741994148792	603
cg02442900	`DGKD;DGKD	NM_152879;NM_003648	Body;TSS200			rs139936765;rs556394867	14;1	0.000200;0.000200		-0.114428161230939	-2.41082464271983	0.0160924364639675	442	-0.0618009326737442	-1.28316670632165	0.199838339885949	432	-0.110936595146895	-2.33664294681298	0.0196529276364688	442	-0.0702074993576504	-1.45825280500101	0.145170040758008	432	-0.11421282111433	-2.40624781494615	0.0162944296260141	442	-0.0663422942455124	-1.37772673456294	0.16869156146417	432	-0.0585880045222064	-1.88428334246356	0.0596614321524958	1034	-0.117386189470021	-2.89108621670836	0.00389495263653618	603	-0.0589511514455429	-1.89598978163248	0.058094935494983	1034	-0.1140884945576	-2.80914453421696	0.00503299893311355	603
cg02445958	`			chr16:66914167-66914782	N_Shelf	rs183324668	23	0.000599		0.00249256403295163	0.0522845725271648	0.958325631157273	442	-0.0567028846859109	-1.1770786474407	0.239563293904958	432	0.000952592860072646	0.0199817624509972	0.984066976536291	442	-0.0704123059746149	-1.46252086449472	0.14399734769735	432	0.00121936591666441	0.0255776479278346	0.979605805499209	442	-0.075868698506941	-1.57627585261309	0.115348216670318	432	-0.000121917482043137	-0.00391656948073473	0.996875794593511	1034	-0.0668652616339643	-1.64167158001522	0.100926913612121	603	-0.00055685549957666	-0.0178888493503702	0.985730981581776	1034	-0.081318686014208	-1.99796388325895	0.0459306958516223	603
cg02446225	`ATG4D;MIR1238	NM_032885;NR_031603	Body;TSS200			rs148200963	5	0.006789		-0.0873827756789927	-1.83764338983988	0.0664423533063941	442	-0.000357827038254524	-0.00742005971008729	0.994083144272546	432	-0.0740394049965267	-1.55591091104295	0.120109193491822	442	-0.0389330931811242	-0.807742089866718	0.419568184649764	432	-0.0718264213667743	-1.50924271744115	0.131622148745609	442	-0.0436573321687459	-0.90587352133082	0.365357762626002	432	-0.0423358636620452	-1.36084273768349	0.173731909241044	1034	-0.0959779651287886	-2.36019381382908	0.0184036817286018	603	-0.030238630858836	-0.971704902300404	0.33135136789791	1034	-0.0853148687983621	-2.09661645853732	0.0362181549435344	603
cg02448796	`KCNAB2;KCNAB2	NM_003636;NM_172130	Body;Body			rs536792523;rs551857859	1;43	0.000200;0.000200		-0.0101684958203604	-0.213303519723181	0.83118615938228	442	-0.0596411541312228	-1.23821482790252	0.216039580841477	432	-0.00215847396479825	-0.0452766021713057	0.963907350061971	442	-0.0764625342253374	-1.58866174558977	0.112520966152119	432	-0.00159534654836002	-0.0334642999067118	0.973319498093739	442	-0.0796633919441629	-1.65544315668526	0.0982079915449521	432	-0.0311026575516029	-0.999487686359578	0.317714756507989	1034	-0.159351749133721	-3.94013563124613	8.49206614121119e-05	603	-0.0200464738091058	-0.644074381380474	0.519642349136979	1034	-0.142128403667517	-3.50807082958602	0.00046411089506782	603
cg02452500	`					rs145883349;rs571678235	1;43	0.002196;0.000200		-0.110393053155432	-2.32510015233546	0.0202648298512652	442	-0.0395288522850809	-0.820115056807442	0.412483153495484	432	-0.126429422743389	-2.66627326997758	0.00778659416689288	442	-0.0492750817314395	-1.02261802940943	0.306867633736678	432	-0.126639528892368	-2.67075220588159	0.00768409355699914	442	-0.0521351275355823	-1.08207811477758	0.279606345089637	432	-0.027517118698865	-0.884203962018949	0.376731838219681	1034	-0.123136228915484	-3.03411923568259	0.00245363923206581	603	-0.0163861298837569	-0.526447558899283	0.598674039134775	1034	-0.12078602381498	-2.97563327043051	0.0029706619280819	603
cg02466798	`ARID3A	NM_005224	Body	chr19:940723-942490	Island	rs556906992;rs141568015;rs10415976;rs555095221;rs573350921	0;26;32;46;47	0.000200;0.000200;0.275160;0.000399;0.000200		-0.110833743579373	-2.33445865715071	0.019767465488026	442	-0.149952252688235	-3.13310189376302	0.00177588912220627	432	-0.124672187174973	-2.62882284423974	0.00869280538458685	442	-0.151053661622963	-3.15647052424878	0.0016406593348993	432	-0.123641575812075	-2.60686609405191	0.00926695506463176	442	-0.154526714547766	-3.23021081925443	0.00127368300581625	432	-0.0305322481776504	-0.981146004062751	0.326675527260835	1034	-0.042301016770824	-1.03764137910639	0.299710171078936	603	-0.0316581289101082	-1.0173496583299	0.309144737230452	1034	-0.0344730435891338	-0.84545206717605	0.39810148519481	603
cg02470008	`IQCE;IQCE	NM_001100390;NM_152558	Body;Body	chr7:2645524-2645765	S_Shelf	rs555366859;rs568543033;rs191701844;rs557471881	34;17;7;2	0.000200;0.000599;0.000200;0.000399		-0.0195298600326051	-0.409713895814609	0.682196128267372	442	-0.0542584868043949	-1.12623400326777	0.260460630279598	432	-0.0207741802240616	-0.43582558378306	0.663154280007093	442	-0.0720520367003062	-1.49669646006864	0.134867915557613	432	-0.0196591693333195	-0.412427352411302	0.680207630607889	442	-0.0762772101608875	-1.58479623896855	0.113397388691339	432	-0.0431537576921081	-1.38716548075223	0.165559454247426	1034	-0.101276768960337	-2.4913719218685	0.0128392097080752	603	-0.0337361556347111	-1.08417723121619	0.278448255020944	1034	-0.0780451489058545	-1.91719926928876	0.0554380744001101	603
cg02483128	`RAI1	NM_030665	5'UTR	chr17:17597824-17598398	S_Shore	rs567684428;rs138883212	0;30	0.000200;0.017971		-0.104664024010412	-2.20352092908039	0.0277891460479597	442	-0.102787637989629	-2.13900424184946	0.0326899231557154	432	-0.0941163825935591	-1.98006216391687	0.047988328588083	442	-0.0981830359199776	-2.04254704617034	0.0413788274046687	432	-0.0917575087181986	-1.93015088665236	0.0538928538023271	442	-0.100767585295305	-2.09667706889252	0.0362886441810397	432	-0.056518797513441	-1.81758963055886	0.069268410444974	1034	-0.0789838963545096	-1.94035569611541	0.0525576140025343	603	-0.0494857056199236	-1.59101581948448	0.111765942917041	1034	-0.0641890836351925	-1.57578130959566	0.115352411226157	603
cg02493846	`LOC100132111	NR_024237	TSS1500	chr1:151810460-151811684	N_Shore	rs111918462	27	0.5		-0.0163363829977637	-0.342705349644956	0.731972332340378	442	-0.0421700723083253	-0.87497613853811	0.381934230721869	432	-0.0447950305994084	-0.940257731224811	0.347439987603107	442	-0.0899003725373819	-1.8692605381465	0.0619138681385972	432	-0.0443492620223254	-0.930888597074735	0.352263764220699	442	-0.092330917035195	-1.92008334143887	0.0551617870220978	432	-0.00426535520467474	-0.137024329628585	0.891037962647916	1034	-0.101156846745429	-2.48840156175788	0.0129465259114502	603	-0.0389166531206501	-1.25081973047653	0.211168484035083	1034	-0.129295035708756	-3.18754895108913	0.00146386448877093	603
cg02504211	`C3orf21	NM_152531	Body			rs145314779	16	0.006789		0.0125242542731558	0.262724711274878	0.79288044682982	442	-0.0555321365245596	-1.15272479950747	0.24942031990008	432	0.0220643985855162	0.462901858431956	0.643636656741716	442	-0.0692110575759116	-1.43748924859693	0.150979756077994	432	0.0196503593787397	0.412242481827688	0.68034303853835	442	-0.0688259148891282	-1.42946453361607	0.153272032721495	432	-0.0455001696430366	-1.46269182916227	0.143717896058272	1034	-0.0881333209586551	-2.16623531827629	0.0304698323406374	603	-0.0489706089245945	-1.57442826457309	0.115549400111994	1034	-0.0873057993090326	-2.14579106160821	0.0320703888341892	603
cg02512902	`KSR1	NM_014238	5'UTR			rs556323185;rs115738100;rs541896318	2;14;45	0.000200;0.006989;0.000200		0.117919608049801	2.48506388903984	0.0131103273232876	442	0.0697271827255989	1.4482437485097	0.147948843593242	432	0.0580030819001353	1.21805012339461	0.223597888449866	442	0.0225148684507078	0.466957163074462	0.640738824335989	432	0.0595906777946914	1.2514673487316	0.211158578225117	442	0.0225439359318032	0.467560225290204	0.640307659053664	432	0.081615666083442	2.62772836018519	0.0086488866245854	1034	0.198195814140442	4.92399382846063	9.31637732953434e-07	603	0.0324986771904736	1.04437988376953	0.296469197976555	1034	0.126558571391794	3.11934752377732	0.00184656836078619	603
cg02516101	`CSNK1E;CSNK1E	NM_001894;NM_152221	5'UTR;5'UTR	chr22:38712684-38713333	N_Shore	rs551077095;rs569705246	15;19	0.000399;0.000200		-0.0828146638063246	-1.74112271137885	0.0820107142860311	442	-0.12233127041118	-2.54948399264576	0.0109338693398898	432	-0.0681610893970418	-1.43197945476745	0.152541691392138	442	-0.136065460964241	-2.83912178876904	0.0046104691824191	432	-0.0662435005456921	-1.39157327878316	0.164445825731364	442	-0.138841353670849	-2.89779245634884	0.00383507063123547	432	-0.0575450442074999	-1.85066514170219	0.0643559814994819	1034	-0.117269434726642	-2.88818398743487	0.00393088599379466	603	-0.0302255668263116	-0.971284839503705	0.331560411192959	1034	-0.0812473076883209	-1.99620238399508	0.0461223600421505	603
cg02543993	`RNF216;RNF216	NM_207111;NM_207116	Body;Body			rs563331960;rs575578589	13;28	0.000200;0.000200		-0.0460326973090259	-0.966272904684847	0.33426767888232	442	-0.0802215477046929	-1.66709176509867	0.0958674258254938	432	-0.0345139151744018	-0.724257664880295	0.469204235581968	442	-0.112106886013597	-2.33451087025687	0.0197692807247501	432	-0.032932453185932	-0.691046862306104	0.489822027263805	442	-0.110239221330334	-2.29529748330397	0.0219270582225775	432	-0.00300126832406046	-0.0964153045184846	0.923209342034114	1034	-0.117679947569143	-2.89838866121664	0.00380585606027238	603	-0.00303798383817135	-0.0975947922352586	0.922272891365442	1034	-0.121373752238516	-2.99025598423367	0.00283281424851964	603
cg02544257	`FUK	NM_145059	Body	chr16:70507026-70507246	S_Shelf	rs543410154;rs561654808;rs529643615	4;3;1	0.000200;0.001198;0.000200		0.111469175450319	2.34795432318998	0.0190690281099672	442	0.135749814179727	2.832453223363	0.00470705436665347	432	0.0732442075998773	1.53913975691881	0.124152183356049	442	0.121132416462041	2.52425009271213	0.0117461626192834	432	0.0722149705133925	1.51743548895206	0.129541269160065	442	0.12523430011003	2.61061926893143	0.00916947475269356	432	0.100761086658995	3.2479472395174	0.00117697723077838	1034	0.176722539742932	4.37837236188882	1.27119412585702e-05	603	0.0675710118786256	2.17401509836585	0.0298059122175884	1034	0.128120473488383	3.15826916090297	0.00161819257099761	603
cg02564061	`FAM186B;FAM186B	NM_032130;NR_027450	Body;Body			rs538523692;rs555012561;rs114141326	1;50;51	0.000200;0.000200;0.005791		-0.0579028660916522	-1.21594089491616	0.224400277917656	442	-0.151035804077304	-3.15609157679963	0.00164277439891105	432	-0.0488088195409095	-1.02463661784942	0.305905560545476	442	-0.166929042191403	-3.49421483695903	0.000494020285160854	432	-0.0503302363578381	-1.05662874153429	0.291057080018063	442	-0.173204787547476	-3.62822798422556	0.000298109999354257	432	-0.0161406906507084	-0.518560797149964	0.604162516399945	1034	-0.0633714499817521	-1.55565490038122	0.120068339478523	603	-0.0107192092979447	-0.344365181631824	0.730636871163048	1034	-0.0674289102877551	-1.65555218088691	0.0980796421352715	603
cg02566157	`VWCE	NM_152718	3'UTR			rs527548924;rs547669957;rs372584080	49;29;15	0.000399;0.000200;0.001398		0.00577514949219216	0.121141904539443	0.903633407017422	442	-0.00363546448130429	-0.0753869281295185	0.939941787065864	432	-0.00485190081492956	-0.101775128735306	0.918981213627456	442	-0.0327226091844748	-0.678792812301194	0.497557566721524	432	-0.00486305420189026	-0.102009089674265	0.918795611801742	442	-0.0331411321243291	-0.68748091113948	0.492071102953443	432	-0.067992804799285	-2.187627634833	0.0287970533788471	1034	-0.146624025577829	-3.62062877426641	0.000303166129765463	603	-0.0813306381620232	-2.61851072193588	0.00888546971452561	1034	-0.156868984741952	-3.87770928952615	0.000109703021595638	603
cg02566775	`PLAGL1;PLAGL1	NM_001080951;NM_001080955	5'UTR;5'UTR	chr6:144384894-144385888	N_Shore					-0.0348856744975025	-0.732065155129572	0.464427933881409	442	-0.0908568259866529	-1.88925732011744	0.0591796504010701	432	-0.0445868944351391	-0.935883092807558	0.349687047774673	442	-0.12008893333622	-2.50229254900141	0.0124961338977397	432	-0.0444033787663205	-0.932025999311979	0.351675910111613	442	-0.123882956511044	-2.58215559739016	0.00995657812789634	432	-0.020851181592951	-0.669936238889759	0.503017361806369	1034	-0.0544382021649896	-1.33588961946025	0.181875046473018	603	-0.0290061945550664	-0.932078408980598	0.351446460029362	1034	-0.0628221718004586	-1.5421353557867	0.123320107463384	603
cg02571874	`TMEM40	NM_018306	5'UTR			rs570474882;rs545608750;rs57634225	49;20;5	0.000200;0.000399;0.005391		-0.0647277183880268	-1.35964102060688	0.17433880101907	442	-0.142709137169503	-2.9796182284194	0.00295106880214252	432	-0.0562170234718361	-1.18046284251178	0.238206560709542	442	-0.150133037774999	-3.13693707374587	0.00175301428333791	432	-0.0568420115759534	-1.19361473201596	0.233020087019454	442	-0.15562968661042	-3.25364613918389	0.0011739935531148	432	-0.0418835593958475	-1.34628676181743	0.17837870325853	1034	-0.131188089655927	-3.23475856441773	0.00124335902979629	603	-0.0254530738968066	-0.817850456736506	0.413580936615863	1034	-0.116461799322532	-2.868110404563	0.00418778630718882	603
cg02577773	`KLF7	NM_003709	Body	chr2:208030852-208031477	N_Shelf	rs557528564	28	0.0002		-0.0948503766740041	-1.99559723765799	0.0462654663853791	442	-0.0555390920501847	-1.1528694785765	0.249360936389627	432	-0.0926566598185428	-1.94917337253524	0.0515745545925022	442	-0.0661020266149653	-1.37272249343691	0.170242693416324	432	-0.0897277213843285	-1.88722019223339	0.0594461819989448	442	-0.0720422371439795	-1.49649219183006	0.134921119626061	432	-0.0574314992700473	-1.84700544325323	0.0648849614100989	1034	-0.098364932257978	-2.41926886521137	0.0156789089798311	603	-0.0523194312199011	-1.68228511221523	0.0926670773105309	1034	-0.0690456163995753	-1.69537163954407	0.0902667713369417	603
cg02577881	`FBXO34;FBXO34	NM_017943;NM_152231	5'UTR;5'UTR	chr14:55737940-55738999	S_Shore	rs79639998;rs528707711;rs142121600	14;27;49	0.007588;0.000200;0.000200		-0.087239345468798	-1.83461166082237	0.0668913411783698	442	-0.134798174375884	-2.81235176101549	0.00500939384203889	432	-0.0680529564008298	-1.42970066759506	0.153195085539664	442	-0.124532644945676	-2.59583892461918	0.00957096969415228	432	-0.0659648645903659	-1.38570290951507	0.16623205149033	442	-0.127831924533605	-2.66536124162281	0.00781034702511918	432	-0.080158669102761	-2.58061442400954	0.00992003497468506	1034	-0.0684981775712003	-1.68188723587323	0.0928543736496757	603	-0.055754096709773	-1.79294614295415	0.0731254386210473	1034	-0.0381207988308697	-0.934995957045706	0.350049181851848	603
cg02580923	`					rs568961649;rs537969480	9;27	0.000399;0.000998		-0.118139976620431	-2.48975168502999	0.0129396136999963	442	-0.113437869595582	-2.36246626335082	0.0183465768244788	432	-0.10601592892018	-2.23219693386109	0.0258252027829946	442	-0.094144636500596	-1.95802326199695	0.0505317476915015	432	-0.102942764670158	-2.16702220006975	0.0304742697881699	442	-0.096952027357356	-2.01677497063187	0.044007616320344	432	-0.0979574405035873	-3.15698270076273	0.00161223534362271	1034	-0.106568412007289	-2.62251479570624	0.00882056031755026	603	-0.0619907069948212	-1.9939932134308	0.0462755851756844	1034	-0.049249318206045	-1.20833945007863	0.227203997768391	603
cg02583484	`HNRNPA1;HNRPA1L-2;HNRNPA1	NM_002136;NR_002944;NM_031157	Body;Body;Body	chr12:54673322-54673550	S_Shelf	rs555279216;rs374887260;rs111389155;rs111503359	0;1;12;47	0.000200;0.000200;0.000200;0.006789		0.0718239937053766	1.50919153031884	0.131635230801642	442	0.0801141676021405	1.66485068070479	0.096314222219694	432	-0.00832347239533164	-0.174598662065288	0.861473725510414	442	0.0157612766058995	0.326859855724829	0.743922699498476	432	-0.00270223787940018	-0.0566827579233017	0.954823584786175	442	0.00538762548484043	0.111721260867825	0.911096123876843	432	0.0844348741297833	2.71892342052165	0.00659472611524432	1034	0.230018671479972	5.74170865517467	1.10731105897101e-08	603	0.0597637741254747	1.9221873913223	0.0547129192957086	1034	0.185210305791527	4.59349912398619	4.68846866545591e-06	603
cg02592133	`C2orf55	NM_207362	5'UTR							-0.0328292883887525	-0.688880517114436	0.491183680845461	442	-0.0971163228646314	-2.02021425785096	0.0436488407656983	432	-0.0330388082169219	-0.6932802142619	0.488420388341561	442	-0.124973381300019	-2.60512271488879	0.00931699151232562	432	-0.0313349560787537	-0.657502836402569	0.511132306833205	442	-0.12770106282207	-2.66260260262508	0.00787425472655816	432	-0.0326377058214495	-1.04885088707178	0.294406583591991	1034	-0.119499356577156	-2.94362826188449	0.00329398726373094	603	-0.0179959821900383	-0.57817897223076	0.56324836968017	1034	-0.0870084339418516	-2.13844525858047	0.0326628371552956	603
cg02597894	`VARS	NM_006295	Body	chr6:31763240-31763905	N_Shelf	rs138074588;rs150140376;rs148951521	35;31;15	0.000599;0.000229;0.005591		-0.164999097711022	-3.49298220845941	0.000495854855761931	442	-0.182912541705769	-3.83612547213222	0.000131810180145863	432	-0.14558259848613	-3.07561906036787	0.00215212216591093	442	-0.171541223703337	-3.59267522112548	0.000341403748563193	432	-0.145948138317246	-3.08345314366617	0.00209669520792785	442	-0.17434395370421	-3.65258578484958	0.000271480747767902	432	-0.0520917162818078	-1.67494983344567	0.094098155643218	1034	-0.174768418412621	-4.32893966933286	1.58897444977288e-05	603	-0.0568944955520023	-1.82969777430219	0.0674354855408904	1034	-0.174291215411712	-4.3168733455557	1.67734212032506e-05	603
cg02598079	`			chr2:64836206-64836765	N_Shelf	rs58780483	36	0.011382		-0.0418769945756187	-0.878933279429303	0.379777883078201	442	-0.0482918829749651	-1.00218134860683	0.316631475642901	432	-0.103339452086177	-2.17543265680321	0.02983650775351	442	-0.110680794226073	-2.30456723802649	0.0213992594057236	432	-0.100879552463337	-2.12328967863647	0.0339827049633492	442	-0.115970519154732	-2.415684629184	0.0158844332586251	432	0.0414704418715807	1.33299236963462	0.182703034150354	1034	-0.0132788418315193	-0.32555394462193	0.74486793445261	603	-0.0091034529210116	-0.292454290223597	0.769995002238728	1034	-0.081276274116533	-1.99691722514993	0.0460444989025681	603
cg02610360	`TMEM136	NM_174926	5'UTR	chr11:120195805-120196372	S_Shore					-0.200647472253977	-4.2667032289289	2.14037349713757e-05	442	-0.143922677974054	-3.00531045372097	0.00271459905408617	432	-0.164645551681889	-3.48535907111065	0.000510055962221739	442	-0.130575394390132	-2.72321690055566	0.00657294743562692	432	-0.164705899703624	-3.48666022675632	0.000507605485338452	442	-0.130032903791307	-2.71177327244672	0.0068026949523033	432	-0.0851538564690306	-2.74218782739939	0.00614649700762629	1034	-0.147676065077347	-3.64699065975735	0.000273925333039667	603	-0.062052858329827	-1.99599751992267	0.0460567552521062	1034	-0.1106302534971	-2.72328062252363	0.00654088301235102	603
cg02626388	`			chr19:13953222-13953554	S_Shore	rs570396060	34	0.0002		-0.0666893815698987	-1.40096766059518	0.161617487968678	442	-0.095143820873143	-1.97893006525963	0.0481227598763285	432	-0.0571069630260096	-1.1991905000091	0.230845651319669	442	-0.0859236970431813	-1.78615605187888	0.0744209581937737	432	-0.0560308724999386	-1.17654576838977	0.239766917521646	442	-0.0896583555633047	-1.86420118727262	0.0626219994386256	432	-0.0321665086184113	-1.0336978821462	0.301436218674759	1034	-0.115673169421174	-2.84851289277713	0.00445320626366684	603	-0.024521664551044	-0.787910462251853	0.43088382360713	1034	-0.10080591166903	-2.47970964900355	0.0132651321821881	603
cg02637282	`					rs575232575	38	0.0002		-0.0474192091301635	-0.995420264576635	0.319897593081838	442	-0.10118115596724	-2.10534139292392	0.035525647928176	432	-0.0209860000994747	-0.440270692961284	0.659933871816824	442	-0.0797872296407049	-1.65802753646169	0.097684803938498	432	-0.0206258521017739	-0.432712893076665	0.665413093154136	442	-0.0827777517031385	-1.7204528035434	0.085711178678823	432	-0.0735657938145939	-2.36756043774507	0.0179854676364182	1034	-0.155472782459027	-3.8426252877338	0.000126482122143587	603	-0.0446139139643346	-1.43416316202821	0.151692780498381	1034	-0.121262362851678	-2.9874844481811	0.00285848369560978	603
cg02642565	`C16orf5	NM_013399	5'UTR			rs80120056;rs537682935;rs180986216;rs187331897	13;20;35;45	0.011781;0.000399;0.000200;0.000799		-0.0784089621249088	-1.64810331422825	0.099697596429228	442	-0.0836334570374668	-1.73832079130842	0.0825116443216608	432	-0.0678819116326918	-1.42609615093644	0.154232953048929	442	-0.0647584714860177	-1.3447421498809	0.179113272431297	432	-0.0646269099976221	-1.35751756321719	0.175012118634829	442	-0.0674393170773608	-1.40057732875059	0.16174342343576	432	-0.132016849562502	-4.26590815043946	2.05679911025105e-05	1034	-0.0690611182705521	-1.69575349340201	0.0901943494165544	603	-0.107717453380409	-3.47387466781378	0.000521120361337744	1034	-0.0542801526843338	-1.3320035056504	0.183148757583525	603
cg02654940	`HMGA1;HMGA1;HMGA1;HMGA1;HMGA1;HMGA1	NM_145903;NM_145899;NM_002131;NM_145901;NM_145902;NM_145905	5'UTR;5'UTR;5'UTR;5'UTR;5'UTR;TSS200	chr6:34202567-34206193	S_Shore	rs546937733;rs185660737	17;49	0.000200;0.000200		0.0891032188854096	1.87401493919309	0.0612470634903673	442	0.143813963692596	3.00300845950471	0.0027350569759499	432	0.0454412635842926	0.95384087964992	0.340521683301779	442	0.0782395286149183	1.62573209416879	0.104385076406352	432	0.0474118197404029	0.995264914165755	0.319973094851125	442	0.0748364335483684	1.55474811418629	0.12039497373039	432	0.0686075392421668	2.20746838533369	0.0273793486550205	1034	0.181721671999421	4.50499508759672	7.10394618933645e-06	603	0.0405371574396879	1.30296033883107	0.192757041524919	1034	0.134671430851849	3.32168992276601	0.000915606337756027	603
cg02699834	`KRT2	NM_000423	Body			rs2232561;rs111399639;rs554698610;rs574546520	50;9;5;1	0.007188;0.500000;0.000200;0.000200		-0.152958936072821	-3.23387339122922	0.00125677066688816	442	-0.118590396684386	-2.47076927225565	0.0136470156095524	432	-0.122148767043313	-2.57507248084404	0.010158396101878	442	-0.0998356050159047	-2.07715471008214	0.0380592074606986	432	-0.122960002220229	-2.59234857409539	0.00966494919025585	442	-0.0999639416730943	-2.07984278251934	0.0378111310706887	432	-0.0901655591109269	-2.9044346470499	0.00371075927838442	1034	-0.0816139254576364	-2.005250124263	0.045145016491007	603	-0.0649307453526161	-2.08882320548606	0.0368355240462512	1034	-0.058632973653937	-1.43905560642698	0.15042140844585	603
cg02711163	`S100A9	NM_002965	TSS200			rs12119788;rs3014867	24;18	0.055312;0.006989		-0.0205992681956327	-0.432155027332356	0.665818246588021	442	-0.034669582998224	-0.719212026495385	0.472312220643873	432	-0.0378189086219241	-0.793674653886835	0.427702504502643	442	-0.0664409020169435	-1.37978056178451	0.168058032091312	432	-0.0347935824258731	-0.730131067942305	0.465608598762046	442	-0.0722423592612034	-1.50066372317315	0.133837811505672	432	-0.0503328781010869	-1.61829899173924	0.105756346247766	1034	-0.0741912600272331	-1.82216929987899	0.0686715891215647	603	-0.05622928364287	-1.80825941608373	0.0707085738206694	1034	-0.0749088854713191	-1.83986042688193	0.0660280067231105	603
cg02712545	`IGF1R	NM_000875	Body	chr15:99395434-99395976	S_Shelf	rs180924526;rs146302994;rs529350353	20;33;38	0.000399;0.003195;0.000200		-0.0558136763365374	-1.17197553070444	0.241596562181571	442	-0.0533800715263928	-1.10796588129747	0.268268512027055	432	-0.0626060998333148	-1.31495642943277	0.188920333651233	442	-0.0705746016095799	-1.46590310588219	0.143073217546486	432	-0.0611566149289256	-1.28443489596543	0.199385320589191	442	-0.0771998274855645	-1.6040413711504	0.109086802260814	432	-0.0207362673372043	-0.66624304950856	0.505374152220616	1034	-0.0965563623695864	-2.37450603348739	0.017708013991076	603	-0.0376113794929232	-1.20882664307361	0.226896776763558	1034	-0.103350315621607	-2.54274332124521	0.0111038449609329	603
cg02716792	`CMIP	NM_198390	Body	chr16:81478214-81479350	S_Shore	rs570377060	18	0.002596		-0.0720866614581531	-1.51472997127731	0.130225595692799	442	-0.135969166295676	-2.83708734129816	0.00463974320468449	432	-0.0339939593892474	-0.713338167872926	0.475929715569387	442	-0.138273595529387	-2.88578872283601	0.00398332064032297	432	-0.0326698584613175	-0.685532696082419	0.493291946580351	442	-0.142717021637849	-2.97978512338854	0.00294947380102892	432	-0.0883016186317706	-2.84407537566589	0.00448972034998375	1034	-0.103478841471893	-2.54592823247223	0.0110034666015942	603	-0.0429263586182377	-1.37984678327761	0.167802090111941	1034	-0.0535176163431142	-1.31325523112021	0.189386729622775	603
cg02716826	`SUGT1P1;AQP3	NR_003667;NM_004925	Body;Body	chr9:33447446-33447824	N_Shore	rs541763824	5	0.000599		0.0988033672647402	2.07930073835822	0.0378548719500495	442	0.124899318672508	2.60356256706597	0.00935924730755592	432	0.0329489913295809	0.691394146168594	0.489603931710229	442	0.0777758346009267	1.61605786063385	0.106461786362796	432	0.0371520824808421	0.779667507911195	0.435900189480767	442	0.0739539222079611	1.53634611985159	0.124844742231689	432	0.0396027440272782	1.27289425887059	0.203224094885483	1034	0.0627309317158573	1.53988972783145	0.123866837266217	603	0.0245303165395934	0.788188572570002	0.430721189265575	1034	0.0377645022274006	0.926248645329445	0.354574164295434	603
cg02724490	`RP1L1	NM_178857	5'UTR			rs142176663	2	0.0002		-0.0778349974369294	-1.63598979971298	0.102209871544334	442	-0.118559336340261	-2.47011600633304	0.013671825925704	432	-0.0916847635288944	-1.92861202459998	0.0540841458629381	442	-0.136943618442955	-2.85767740702371	0.00435109824905563	432	-0.0907024524453589	-1.90783409680827	0.0567230095710383	442	-0.138172599956121	-2.88365364199879	0.00401022886033682	432	-0.0452961518129514	-1.45612427027035	0.145524666231309	1034	-0.108293761808452	-2.66530615090859	0.00777745139740243	603	-0.0444131160751909	-1.42769977174575	0.15354554369791	1034	-0.12568483472221	-3.09758137733981	0.00198685503416952	603
cg02743878	`DHRS9;DHRS9;DHRS9;DHRS9	NM_001142271;NM_005771;NM_199204;NM_001142270	TSS1500;5'UTR;5'UTR;5'UTR			rs190888542	36	0.0002		-0.0157630707691839	-0.330676351958747	0.741036032109354	442	-0.0715797984498766	-1.48685315197952	0.137450230949311	432	-0.0118765809221379	-0.249136977437423	0.803366553998676	442	-0.0774330533284131	-1.6089067294798	0.108017850575745	432	-0.0104233317021894	-0.218649569018442	0.827021332758916	442	-0.0841995321149195	-1.7501424219418	0.0804485880603612	432	-0.020098659830641	-0.645751520364084	0.518555684220242	1034	-0.125148856917168	-3.0842317379753	0.00207767243373249	603	-0.00872349517426997	-0.280247270017149	0.779341241752652	1034	-0.10580501564083	-2.60358647425043	0.00932061718450904	603
cg02746658	`CMIP;CMIP;CMIP	NM_030629;NM_030629;NM_198390	1stExon;5'UTR;Body			rs17777059;rs573415317;rs540705412;rs115922424	38;10;7;1	0.148962;0.000200;0.000200;0.003594		-0.0928256954115308	-1.95274985410913	0.0511481499831708	442	-0.117787661102901	-2.45388757756374	0.0143011016394012	432	-0.0646265809320294	-1.35751063172892	0.175014319686394	442	-0.12129910933112	-2.52775825598361	0.0116301164144077	432	-0.0630735880199952	-1.32480142090206	0.185632791259372	442	-0.124010437690975	-2.5848403486584	0.0098798445597067	432	-0.0704189456644785	-2.26594194197032	0.023546137231176	1034	-0.133994108460097	-3.30478001529604	0.000972286843808428	603	-0.0324715926489587	-1.04350888030403	0.296872142261243	1034	-0.0777009717556526	-1.90871018301812	0.0565265061440884	603
cg02752037	`TICAM1	NM_182919	5'UTR	chr19:4831433-4831892	N_Shore	rs28576480	2	0.006589		-0.0496822098132784	-1.04300154510504	0.297321479750547	442	-0.0315240032690975	-0.653912313684403	0.513448084558161	432	-0.0816526198523505	-1.71658151220984	0.0864092321195006	442	-0.0793407960842466	-1.64871111607428	0.099581365740291	432	-0.0804488821016237	-1.69116472440444	0.0911637871696475	442	-0.0834696039892843	-1.73489917636745	0.0831167168737056	432	-0.0551864386476843	-1.77465398118388	0.0761006496946312	1034	-0.124726370101353	-3.07371010982628	0.00215191947279256	603	-0.0681016919346969	-2.19114188004065	0.0285414316713622	1034	-0.130391526009307	-3.21489070639787	0.00133212328947661	603
cg02753187	`CALCOCO2	NM_005831	Body							-0.00172533716255925	-0.0361910135544022	0.971146450146437	442	-0.140204892226538	-2.92662874591558	0.00349922408526638	432	-0.00411033689250609	-0.0862196395951162	0.931330846176355	442	-0.144253262911549	-3.01231094863648	0.00265324243926226	432	-0.00232394808470315	-0.0487476340362999	0.961142498874	442	-0.146031433961854	-3.04997739175643	0.00234435426505214	432	-0.0678567190744865	-2.18323565039136	0.0291192912030965	1034	-0.0578589208298569	-1.42001486980493	0.155890880928386	603	-0.0655403717011546	-2.10849100411623	0.0350981276788223	1034	-0.0602280303996395	-1.47829751345717	0.139612521534007	603
cg02765363	`			chr17:80200604-80200876	Island	rs183872122;rs532883238;rs551312130	18;10;9	0.000399;0.000200;0.000200		-0.031611452386715	-0.663308422721816	0.507409683913493	442	-0.0968419933928657	-2.01447163165777	0.0442492843788907	432	-0.00471242843352772	-0.0988494644694673	0.92130252067143	442	-0.100373465178015	-2.08842091377542	0.0370286634122779	432	-0.00425303867241396	-0.0892130297324916	0.928952989324951	442	-0.0993474760157763	-2.06693125035789	0.0390154041040816	432	-0.0564705499473773	-1.81603472652557	0.0695067297835714	1034	-0.0748480249065928	-1.83835999922485	0.0662489086972423	603	-0.0613325992032551	-1.97277096953993	0.0486468352209287	1034	-0.0548663416817398	-1.34641703291764	0.178457642677148	603
cg02775243	`			chr10:102825929-102827693	S_Shelf					-0.0252298968833651	-0.529339117397516	0.596798244335492	442	-0.0863206340189582	-1.79444861850402	0.0730866821866577	432	-0.0183957677314707	-0.385916415163029	0.699728984603201	442	-0.0995181970250441	-2.07050674710274	0.0386786916694825	432	-0.0168674389404489	-0.353847944498758	0.723609764523312	442	-0.103781913232659	-2.15984429022573	0.031033465633284	432	-0.0449417533670726	-1.44471608238793	0.148704412938507	1034	-0.114532123334801	-2.82016422011194	0.00486418478325248	603	-0.029031208484949	-0.932882652636488	0.351031090007651	1034	-0.0860628386292282	-2.11508879986162	0.0346092888074699	603
cg02782510	`B3GALNT1;B3GALNT1;B3GALNT1;B3GALNT1;B3GALNT1	NM_001038628;NM_033167;NM_033168;NM_033169;NM_003781	5'UTR;5'UTR;5'UTR;5'UTR;5'UTR	chr3:160822494-160823260	N_Shelf	rs569123361	49	0.000399		0.00768212083991658	0.161144696225931	0.872052152711336	442	-0.0733198613701713	-1.52312627082035	0.128119911979043	432	0.0105500858176146	0.221308678203058	0.824951565024321	442	-0.0633679196835883	-1.31578821961528	0.188650125338321	432	0.0108591717949416	0.227792863428827	0.819909609892055	442	-0.0637647489727921	-1.32405043195505	0.185891270105003	432	-0.0399951561777247	-1.28552040319788	0.198779135772806	1034	-0.0972380850978279	-2.39137707571124	0.0169176794932472	603	-0.0472178960044509	-1.51799223391433	0.129180265372549	1034	-0.108250026360402	-2.66422124508273	0.00780246771571479	603
cg02782634	`TMEM49	NM_030938	Body			rs183798600;rs111935573;rs561844219	4;7;18	0.000200;0.500000;0.000799		0.0466241235075013	0.978705449890825	0.328088042270086	442	0.110605810982505	2.30299308166459	0.0214880998555303	432	0.014849238406505	0.311503149402172	0.755556990824528	442	0.090790722465408	1.88787516700243	0.059365352529941	432	0.0142053729650993	0.297994462587016	0.765840404068703	442	0.093922483381357	1.95337549989343	0.0510808139882442	432	0.0695298851343921	2.23724055270329	0.0253651470437485	1034	0.115786373150329	2.85132579052212	0.00441419464887613	603	0.0386290892368683	1.24156790197643	0.214564098510742	1034	0.0696984551711986	1.71145357331602	0.0872569874148073	603
cg02789485	`GLIPR1L2	NM_152436	TSS1500	chr12:75784799-75785241	N_Shore	rs118074427	3	0.0002		-0.0710835707543775	-1.49358058281833	0.135672250023209	442	-0.0732957223039522	-1.52262300793834	0.128245902564047	432	-0.0744170666144849	-1.5638766982113	0.118225404095606	442	-0.0693064144760621	-1.43947614204194	0.150416255962298	432	-0.0715155242806179	-1.50268761330139	0.133305680815384	442	-0.0744285197359431	-1.54624205440828	0.122436119220822	432	-0.0507483763810751	-1.63168095541853	0.102903968669393	1034	-0.0890141375229403	-2.18799955027968	0.0288418809024442	603	-0.0422974244307167	-1.35960567151264	0.174123272300275	1034	-0.066363946189891	-1.62932690099159	0.103514150396511	603
cg02790691	`DTNA;DTNA;DTNA;DTNA;DTNA	NM_001128175;NM_032978;NM_001392;NM_032979;NM_032975	5'UTR;TSS1500;5'UTR;5'UTR;5'UTR			rs559055459	2	0.0002		-0.0268415060448386	-0.563167454506614	0.573561695966348	442	-0.0954541130886017	-1.98542339335356	0.047394516716273	432	-0.0241071960711048	-0.505774804240607	0.613233650745303	442	-0.101181913547274	-2.10535726493076	0.035524262882021	432	-0.0219560633589175	-0.460628298118321	0.645266334719467	442	-0.107155358357495	-2.23058449541072	0.0259375667052986	432	-0.0295162513871809	-0.948477902588305	0.343038178121312	1034	-0.0999923411285631	-2.45956162915315	0.0140304824619192	603	-0.038227776061969	-1.22865674717846	0.219368335886586	1034	-0.118267847054395	-2.91300461724646	0.00363307273136305	603
cg02809401	`LTBP3;LTBP3;LTBP3	NM_021070;NM_001130144;NM_001164266	TSS1500;TSS1500;TSS1500	chr11:65325081-65326209	Island	rs184829766;rs149289432	26;1	0.000200;0.008586		-0.0527130918929534	-1.10674499757617	0.268787099698508	442	-0.113282739492046	-2.35920754064255	0.0185076637180273	432	-0.0408534529799733	-0.857426488021132	0.391544234630855	442	-0.0976489021070082	-2.03136379153927	0.0425027166939122	432	-0.0379870820235462	-0.797207364150638	0.425649266160333	442	-0.103393550492686	-2.15170367675078	0.031671728986796	432	-0.0568976713940926	-1.82980012879532	0.0674201630409305	1034	-0.156179849954244	-3.86039063663784	0.000117704263046414	603	-0.0453533451742526	-1.45796537533629	0.145016422183715	1034	-0.133456591221144	-3.29136268282425	0.00101955599059519	603
cg02810967	`NCAPG;DCAF16	NM_022346;NM_017741	Body;TSS1500	chr4:17811954-17813227	S_Shore	rs372044718	46	0.000399		0.140897432405716	2.97528333002836	0.00299127499302558	442	0.211655261066689	4.45633598055537	9.13099716646422e-06	432	0.0541223638543706	1.13639073332398	0.256179365607371	442	0.13641099234073	2.84642238528038	0.00450679313227267	432	0.057289373481494	1.20302933325786	0.229357000024646	442	0.130318267371797	2.71779270096968	0.00668096076912874	432	0.159040303662488	5.15287334500258	2.73795544700662e-07	1034	0.211308615246347	5.2595306147021	1.62861132088235e-07	603	0.113144700599146	3.65037656413274	0.000266791664648749	1034	0.146270336185683	3.61176793570849	0.000313634491719527	603
cg02812482	`			chr19:13975668-13976918	N_Shore	rs182797139;rs548003791;rs566309582	49;23;16	0.000200;0.000399;0.000399		-0.0841019304992062	-1.76831404463792	0.0773513618155603	442	-0.126117338605264	-2.62922420012769	0.00868552067932437	432	-0.0686000260775778	-1.44122992267455	0.149911102932742	442	-0.129364790299089	-2.69768193409025	0.00709551071122621	432	-0.0669443560454265	-1.40634003527894	0.160016655291802	442	-0.132544478297654	-2.76476787282321	0.00579632291530836	432	-0.0965734259954332	-3.11209691899658	0.00187775389272376	1034	-0.144435479361128	-3.56581498422266	0.000373575125292568	603	-0.0717136601882581	-2.3077454624525	0.0210997009921209	1034	-0.111168563180484	-2.73664177144564	0.00628228398209622	603
cg02813606	`VPS52	NM_022553	Body	chr6:33239326-33240099	N_Shelf	rs145909637	2	0.0002		-0.0307137298402804	-0.644459329965443	0.519547784784436	442	-0.12616074354282	-2.63013881658513	0.00866233006132952	432	-0.0437305572984186	-0.917885316840531	0.359028570939139	442	-0.155370514559741	-3.24813866074282	0.00119675014753917	432	-0.0400119531274231	-0.839746133243752	0.401381126139904	442	-0.157902437088336	-3.30196231806995	0.000990843760250485	432	-0.0277211890787109	-0.89076467799616	0.373201824938913	1034	-0.0396070214364013	-0.971486273945193	0.331570556051412	603	-0.0436415097665758	-1.40286396365107	0.160825254021266	1034	-0.0657910755829515	-1.61522121626985	0.106534754234374	603
cg02832224	`SSBP3;SSBP3;SSBP3	NM_001009955;NM_018070;NM_145716	Body;Body;Body	chr1:54821990-54822333	S_Shelf	rs541269460	10	0.0002		-0.0865895785088852	-1.82087829000637	0.0689566318849292	442	-0.0895045116738165	-1.86098520475066	0.0630756001398868	432	-0.0960113248933645	-2.02017331127887	0.0436465544017609	442	-0.0617211518893974	-1.28150600213122	0.200420621710386	432	-0.0961859223861484	-2.02386983640255	0.0432636967479238	442	-0.06602175200297	-1.37105058716361	0.170763300928899	432	-0.0409316204426492	-1.31565342855928	0.188459152992163	1034	-0.0496218035407859	-1.21749341154765	0.223704225767298	603	-0.0428546001920299	-1.37753731279949	0.168514487489084	1034	-0.0488333440539041	-1.19811713303298	0.231158201227192	603
cg02835462	`MAST2	NM_015112	Body							-0.00990449763875174	-0.207765289242591	0.835505713964852	442	-0.0207211754004352	-0.429744951623015	0.667574082988	432	0.0139453876758604	0.292539884480309	0.770004522940635	442	0.0199080842770491	0.41287737331437	0.679882279210599	432	0.0125690651741291	0.263664820654507	0.792156294458461	442	0.0186582834219254	0.386951307420105	0.698967071810913	432	-0.0739791626124925	-2.3809124768954	0.0173480099554173	1034	-0.117663252775552	-2.89797363663926	0.00381086963710952	603	-0.0667248027099857	-2.14670770826271	0.0319216709811464	1034	-0.10275248849501	-2.52793009824826	0.0115814882471565	603
cg02836325	`PGS1	NM_024419	Body			rs537256039;rs532420434;rs4129767;rs186305552	0;1;29;50	0.000599;0.000200;0.215855;0.000200		-0.0332560163322802	-0.6978414217766	0.485564538959679	442	-0.0962344175463389	-2.00175414816405	0.0456038896899289	432	-0.0342141156816423	-0.717961582666704	0.473075646018935	442	-0.124866100097147	-2.60286281897094	0.00937825516351346	432	-0.0322440074468487	-0.67659054958061	0.498946904189483	442	-0.130020341577058	-2.71150829690673	0.00680809926562485	432	-0.0281271345590392	-0.903815754701051	0.366240825074209	1034	-0.0667445561139831	-1.63869918231393	0.101545115922154	603	-0.0330856914604516	-1.0632578750004	0.287825787411403	1034	-0.0767096436619899	-1.8842617452067	0.059761039801806	603
cg02839351	`HDGF2;HDGF2	NM_032631;NM_001001520	Body;Body	chr19:4472119-4473123	S_Shore	rs576494476;rs542568661;rs562354104;rs572742762;rs541287112	0;1;33;44;45	0.000200;0.000200;0.000200;0.000399;0.000200		-0.0457477265718965	-0.960282693176934	0.337271778814838	442	-0.132484093077978	-2.76349331701054	0.00581885705767284	432	-0.0389293196518335	-0.817001184574072	0.414251968727944	442	-0.148997094315938	-3.11284266099708	0.00190134902580446	432	-0.037161750941077	-0.779870595634361	0.435780688020236	442	-0.153919158994668	-3.21730532523589	0.00133186578113092	432	-0.00837216358478732	-0.268960003321255	0.788011803851974	1034	-0.0988038482247937	-2.43013462562727	0.0152183783615294	603	0.000381257978116035	0.0122478204216826	0.990230264485862	1034	-0.0765473750778693	-1.88026018508457	0.0603048055350825	603
cg02844899	`TTC7A	NM_020458	Body			rs146828975;rs6732744;rs190561872	47;24;1	0.000200;0.023962;0.000200		-0.0198144579657287	-0.415685983624793	0.677822553539319	442	-0.09486532649393	-1.97310248387251	0.0487843300617257	432	-0.0245872900750776	-0.515851314457823	0.606181079701731	442	-0.117700312126162	-2.45205080628154	0.0143739116892951	432	-0.0236095974100054	-0.495331141678724	0.620581206089687	442	-0.122818089051353	-2.55973286374001	0.0106184880416095	432	-0.0312343868643092	-1.00372357356701	0.315668456002468	1034	-0.0888548720381163	-2.1840639811383	0.0291305838168446	603	-0.0357275651881197	-1.1482280647517	0.251039660988019	1034	-0.0957460863729369	-2.35445651314219	0.0186892049247994	603
cg02852407	`CD34;CD34	NM_001773;NM_001025109	TSS1500;TSS1500	chr1:208084098-208084513	S_Shore	rs145443553;rs140235292	15;1	0.003794;0.000200		-0.022023768042092	-0.462049170606358	0.644247659096141	442	-0.106110574746779	-2.20867022103572	0.0274326178734496	432	-0.0195061574986507	-0.409216517790393	0.682560861148141	442	-0.113508376264287	-2.36394739198602	0.0182737679620391	432	-0.0188264630990281	-0.394953887892245	0.693051096738761	442	-0.117989929867268	-2.45814102538035	0.0141337431451818	432	-0.056544644779363	-1.81842262981942	0.0691410135426443	1034	-0.136800018069087	-3.37485237639542	0.000756754906651543	603	-0.0449203100158503	-1.44402582645772	0.148898494092092	1034	-0.115323741630173	-2.83983074618097	0.00457559753828518	603
cg02855207	`RELT;RELT	NM_032871;NM_152222	TSS1500;TSS1500	chr11:73087229-73088294	N_Shore	rs531162961;rs548178001;rs185376717	48;36;5	0.000200;0.000200;0.000998		-0.103827641501887	-2.18578407061747	0.0290673630714824	442	-0.160656813891066	-3.3605650841341	0.000804306719769088	432	-0.0727632651126276	-1.52899736767217	0.126648294819195	442	-0.143623572903427	-2.99897716533655	0.00277122327212385	432	-0.0697110512779852	-1.46464697814337	0.143406836706198	442	-0.146043634945009	-3.05023591013968	0.0023423531678354	432	-0.0667041933010384	-2.14604267607089	0.0319747642655518	1034	-0.0513478180519629	-1.25991530942807	0.207989009976144	603	-0.0360946591967333	-1.16003609837189	0.246199823051795	1034	-0.0274437184015067	-0.672960008898285	0.501177672554127	603
cg02855983	`PKP1;PKP1	NM_000299;NM_001005337	TSS1500;TSS1500	chr1:201252452-201253648	N_Shore	rs567381872	36	0.0002		-0.127152892290354	-2.68169684529929	0.00743870069045466	442	-0.0654172025138926	-1.35846000238676	0.174722236779236	432	-0.131626141181072	-2.77712632221852	0.00557964687051568	442	-0.057509275085445	-1.19385502510787	0.232935179142673	432	-0.131259957766855	-2.76931015190137	0.00571439237386678	442	-0.0593781609563857	-1.23274190351336	0.218074973428303	432	-0.0143387822953695	-0.460661466668624	0.645127234614627	1034	-0.105070822022672	-2.58538514864891	0.00982518723753056	603	0.000228461784555058	0.00733927939654013	0.994145573248109	1034	-0.0882540673798881	-2.16921865797996	0.0302421098180574	603
cg02869235	`					rs73223527	2	0.007788		-0.0171485053607126	-0.359745349456465	0.719196993845842	442	-0.136467538715516	-2.84761719811035	0.00449002834875017	432	-0.0198716106289057	-0.416885300227977	0.676945554048385	442	-0.155212638949242	-3.24478398274759	0.00121081072396847	432	-0.0193455067786308	-0.405845407718639	0.685034886794622	442	-0.15935939937522	-3.33295441508013	0.0008877067844737	432	-0.0237604047348338	-0.763440914006516	0.445332152019135	1034	-0.0969272637355848	-2.38368469525016	0.0172741074054379	603	-0.037491777848695	-1.20497904375345	0.228378610168774	1034	-0.113807667047518	-2.8021693967973	0.00514257513065596	603
cg02879453	`ADCY7	NM_001114	TSS200			rs113400569;rs377145145;rs149478082	8;7;1	0.001198;0.000200;0.003395		-0.0838304490071772	-1.76257896664165	0.0783156938738291	442	-0.105447840589215	-2.19477196154099	0.0284188871869166	432	-0.0529575685513648	-1.11188753902767	0.266570036527706	442	-0.105546654564095	-2.19684407366027	0.0282699302669454	432	-0.0492930251813493	-1.03481789733782	0.301126542436017	442	-0.109959040779421	-2.28941624438964	0.0222677711383881	432	-0.0698921673985674	-2.24893561611439	0.024609759527984	1034	-0.0889026646258839	-2.18524495989514	0.0290436900822859	603	-0.0588378370682015	-1.89233691461981	0.0585800313747371	1034	-0.0774310276129887	-1.90205236431142	0.0573925455651302	603
cg02880508	`UNC13D	NM_199242	Body			rs142571012;rs145830071	1;24	0.001198;0.006190		-0.0254016049236772	-0.532943205460084	0.594302296737617	442	-0.0908117214374946	-1.88831423097744	0.0593063087578233	432	-0.0249587020307964	-0.523646901619375	0.600749985112652	442	-0.111648730672645	-2.32488993692421	0.0202807453934203	432	-0.0221003344048245	-0.463656022290782	0.643096453659948	442	-0.112926326341921	-2.351721027947	0.0188824422815298	432	-0.0573124373396955	-1.8431679765051	0.0654434857189841	1034	-0.0655607178534358	-1.60954946298204	0.107768846827188	603	-0.0638506826637887	-2.05398199344543	0.0400933626621224	1034	-0.0627995439098146	-1.5415784290392	0.123455522972087	603
cg02881189	`KIAA1539	NM_025182	5'UTR	chr9:35111267-35111504	N_Shore	rs77205585	35	0.5		-0.0807593420958582	-1.69771957525358	0.0899179090358083	442	-0.100308439648282	-2.08705880152721	0.0371519809200271	432	-0.0775627336734888	-1.63024405910458	0.103419013708279	442	-0.101419789549339	-2.110341110257	0.0350916302720062	432	-0.0756378018812784	-1.58962801762461	0.112293992898244	442	-0.105210575673771	-2.18979673514625	0.0287793054398514	432	-0.049948532314701	-1.60592085691842	0.1084502841392	1034	-0.10928456670948	-2.68988694951138	0.00722959632062976	603	-0.0402332119755665	-1.29318021361359	0.196117432594611	1034	-0.0898991394485665	-2.20987066402295	0.0272819950713291	603
cg02889774	`XPO7;XPO7;XPO7	NM_001100162;NM_001100161;NM_015024	Body;Body;Body			rs375053163;rs551367650;rs376663994	40;43;44	0.000200;0.000200;0.000399		-0.0304055903951886	-0.637989700443809	0.52374829441143	442	-0.0713912087005778	-1.48292238477442	0.138492038967528	432	-0.0289847719987074	-0.608160053394777	0.543338661332875	442	-0.0783213420854743	-1.62743907448317	0.104022014736911	432	-0.0278564690038906	-0.584473435154449	0.559150560790555	442	-0.0835568249630444	-1.73672053194192	0.0827941849804008	432	-0.0467015150871018	-1.50136695986512	0.133425334679185	1034	-0.126903683820382	-3.12794615984375	0.00179370359120362	603	-0.0468238641680005	-1.50530600804992	0.13240990866779	1034	-0.124436643110225	-3.06649538882664	0.00220422966842067	603
cg02894944	`MALL	NM_005434	Body			rs568911640;rs115500776;rs557701346	31;2;1	0.000200;0.003594;0.000200		-0.051567648926207	-1.08265248218984	0.279342479096155	442	-0.103744979426331	-2.15907007869519	0.031093688190882	432	-0.0219229983020111	-0.459934385623353	0.645764068500428	442	-0.0891699741793339	-1.85399227598423	0.0640713109559155	432	-0.0203499191604106	-0.426922444270888	0.669623182961011	442	-0.093805479936428	-1.95092769859288	0.0513719915843446	432	-0.0907191635563877	-2.92236572873502	0.00350427762143984	1034	-0.121522894092013	-2.99396697774566	0.00279877357064707	603	-0.0539382369516208	-1.73443606928339	0.0829899478804758	1034	-0.0765740619893485	-1.88091828021478	0.0602150970058039	603
cg02919122	`					rs566360039	51	0.000998		-0.0640887589163014	-1.34618226058451	0.178639277319779	442	-0.0720100692281668	-1.49582166519451	0.135095880336252	432	-0.0364489222404161	-0.76489789151113	0.444641551300165	442	-0.0247005170198142	-0.512305027954634	0.608664139713005	432	-0.0352878721501494	-0.74051212328779	0.459291074641907	442	-0.0275376596363873	-0.571177472212973	0.568128833884128	432	-0.0681202248561959	-2.19174002047164	0.028498118995982	1034	-0.137054715352223	-3.38121566300087	0.000739561643635976	603	-0.0524743925507733	-1.68727691196291	0.0917032359740887	1034	-0.112013436240516	-2.75761526390959	0.00589489106378631	603
cg02923856	`NR1D2;NR1D2	NM_001145425;NM_005126	5'UTR;Body	chr3:23986693-23988021	S_Shore	rs147461341;rs184443032	43;40	0.000200;0.000399		-0.0668576049084863	-1.40451214692233	0.160559967469019	442	-0.0734254190066221	-1.52532700832802	0.127570094457408	432	-0.0916378914987471	-1.92762049799357	0.054207700305782	442	-0.0976423938712399	-2.03122753472585	0.0425165679884974	432	-0.0878876738331673	-1.84831618948622	0.0648814831555324	442	-0.0985970735986391	-2.0512166412477	0.0405249864019369	432	-0.0715709223282892	-2.30313638678138	0.0213580992210175	1034	-0.0998590202012883	-2.45626026181994	0.0141595416346356	603	-0.0560268801063396	-1.80173670276758	0.0717299064238383	1034	-0.114795296013989	-2.8267019340223	0.00476647113994384	603
cg02927448	`UHRF1BP1L;UHRF1BP1L	NM_001006947;NM_015054	Body;Body	chr12:100535916-100536620	N_Shelf	rs187013509	2	0.000599		-0.0180185327031632	-0.378000842343546	0.705597068355416	442	-0.0685235307716405	-1.42316445048603	0.155090158778958	432	-0.0294285941421685	-0.617477693599519	0.537180360944584	442	-0.0940483240839395	-1.95600824394852	0.0507691821866545	432	-0.0286781773937188	-0.601723520260441	0.547613205676451	442	-0.0993473479474205	-2.06692856820332	0.0390156576211437	432	-0.0286224939860816	-0.919741878755868	0.357856944402232	1034	-0.106994507952225	-2.63308114686167	0.00855197189650342	603	-0.0303547425590498	-0.975438389364145	0.32949715426465	1034	-0.0966804057535364	-2.37757564963978	0.0175618505324975	603
cg02930866	`EAF1	NM_033083	3'UTR							-0.0152645974353783	-0.320217769718911	0.748945840282684	442	-0.0596863509596643	-1.23915539749018	0.215691164443263	432	-0.035542267219753	-0.745855060572431	0.456058392035153	442	-0.110437559942404	-2.29946100941591	0.0216886097519437	432	-0.0365964844958323	-0.76799731784867	0.442798906903205	442	-0.113098052130916	-2.3553280780688	0.0187010499942107	432	7.35444073974196e-06	0.000236259620229669	0.999811537758567	1034	-0.113738486188588	-2.80045116587385	0.00516989688934848	603	-0.0108211641916667	-0.347640837766941	0.728175727077193	1034	-0.110135667573065	-2.71100614213878	0.00678685289531087	603
cg02931464	`					rs551724166	24	0.0002		-0.0699424283635442	-1.469524164916	0.142079842513583	442	-0.0657847119075615	-1.36611377737335	0.172307519445787	432	-0.0662938366736512	-1.3926337956094	0.164124682738134	442	-0.0943455378041228	-1.96222657450523	0.0500394583380442	432	-0.0670227650591928	-1.40799216941923	0.159526781786942	442	-0.0977189198772684	-2.03282969882865	0.0423539402489522	432	-0.0586109275072648	-1.88502227520314	0.0595615258209667	1034	-0.122827490614539	-3.02643419037512	0.00251651745346759	603	-0.045787665159066	-1.47194683433669	0.141201076277352	1034	-0.0956307322898551	-2.35160244036512	0.018832680220524	603
cg02956699	`PTPRN2;PTPRN2;PTPRN2	NM_002847;NM_130842;NM_130843	Body;Body;Body			rs149297854;rs555739299	43;1	0.003195;0.000200		-0.0282115242516494	-0.591926994731262	0.554150932404244	442	-0.0564826318507357	-1.17249671267535	0.241396478567305	432	-0.0340790671941561	-0.715125474817663	0.474825278118509	442	-0.0787191150815016	-1.6357386413673	0.102271052714231	432	-0.0333968084223791	-0.700797985285025	0.483718228767241	442	-0.082285637700246	-1.7101781243922	0.0875960120540497	432	-0.0409127653053385	-1.3150466958082	0.18866297019768	1034	-0.141972420523401	-3.50416810537854	0.000470915725011309	603	-0.0352801566047429	-1.1338370323317	0.257027517257027	1034	-0.134857717918466	-3.32634128197116	0.000900561699892688	603
cg02970525	`LMOD1	NM_012134	TSS1500			rs143213138;rs74136703	25;45	0.000200;0.044329		-0.0441686456503056	-0.927092520118053	0.354230229777197	442	-0.107039487964769	-2.22815387695586	0.0260998361530657	432	-0.0147737184206059	-0.309918681212462	0.756760955881737	442	-0.108321924351993	-2.25505901646012	0.0243517118927307	432	-0.0138405137073825	-0.290339604871702	0.771686142802695	442	-0.110249770813316	-2.2955189335115	0.0219143183303783	432	-0.0755956466243332	-2.43313372587387	0.0150412935770691	1034	-0.146704906740187	-3.62265518947049	0.000300818539538435	603	-0.0524863397196231	-1.68766177183352	0.0916292612405863	1034	-0.113701527231358	-2.79953323499756	0.00518454673647284	603
cg02976588	`					rs143027411;rs587676364;rs112303719;rs587593792	19;45;49;49	0.002396;0.000200;0.500000;0.056709		-0.0332347860145929	-0.697395598126211	0.485843277158209	442	-0.0770783689906053	-1.60150767759695	0.109646778794694	432	-0.0190424642649832	-0.399486391556902	0.689710909007065	442	-0.0887837746923166	-1.84591996531883	0.0652368338061715	432	-0.0183476950977093	-0.384907694626082	0.700475795045395	442	-0.0917757758136407	-1.90847330641636	0.0566474746148205	432	-0.0556905788432827	-1.79089929150886	0.0734535532922376	1034	-0.170494566152633	-4.22094633095601	2.56683756372168e-05	603	-0.0258323447714181	-0.830042458327321	0.406654552740926	1034	-0.125524889420957	-3.09359741679419	0.0020135686099405	603
cg02979487	`AFF1;AFF1	NM_001166693;NM_005935	Body;Body			rs17012412	38	0.000799		-0.0373451415126673	-0.783722774856814	0.433517562245616	442	-0.0620948560965974	-1.28928511182249	0.197703757279135	432	-0.0469893268985376	-0.986382841097339	0.324309266466571	442	-0.0806120095424897	-1.67524125580658	0.094256679156208	432	-0.0459670984932186	-0.96489397451209	0.334957679542866	442	-0.084386942751133	-1.75405646224621	0.0797748437530746	432	-0.0405747269741822	-1.30416923937106	0.192344628428151	1034	-0.106881816354983	-2.63028651967804	0.0086222878841386	603	-0.0415052296870627	-1.33411184663616	0.182335925454641	1034	-0.0984957246616655	-2.42250664977759	0.015540413061394	603
cg02979520	`PLXNB1;PLXNB1	NM_002673;NM_001130082	TSS1500;TSS200	chr3:48470230-48471389	S_Shore	rs550438550	1	0.0002		-0.0871492142703263	-1.83270656873701	0.0671747556348475	442	-0.121392742478967	-2.52972889154518	0.0115653776185582	432	-0.0507245925602673	-1.06492199998311	0.28728848889092	442	-0.120264207742151	-2.50598037757604	0.0123672818825976	432	-0.0485625273069244	-1.01945807366186	0.308355542419883	442	-0.122816533544917	-2.55970011407304	0.0106194827874973	432	-0.0652740975322644	-2.09990025902358	0.0358482072060501	1034	-0.144978067998508	-3.5794012046762	0.000354821439594992	603	-0.0194834968774766	-0.625981815939792	0.53143931249632	1034	-0.0818105243595365	-2.0101022023838	0.0446281291310544	603
cg02980249	`VARS	NM_006295	Body	chr6:31763240-31763905	N_Shelf	rs138074588	1	0.000599		-0.149285912068897	-3.15502659058815	0.00164772703739464	442	-0.198330109004563	-4.16789381230311	3.30184563081389e-05	432	-0.13369069768226	-2.82120861296687	0.00487202888726137	442	-0.185838139736624	-3.89892690381193	0.000102212843785921	432	-0.133277023155859	-2.81237388611904	0.005006967198442	442	-0.189944469641324	-3.98719381456056	7.10603421169943e-05	432	-0.0910586924461879	-2.93336386523402	0.00338286313630428	1034	-0.179975330555148	-4.46073542351221	8.72100518684066e-06	603	-0.0859710212206401	-2.76863264854156	0.00567046935503828	1034	-0.180246620541462	-4.46760916319056	8.44861980847517e-06	603
cg02980566	`			chr17:21414724-21415547	N_Shelf	rs571571180	2	0.0002		-0.0499779514133486	-1.04922051522182	0.29445152156575	442	-0.108599009712549	-2.2608731767075	0.0239875855626674	432	-0.0651810588938568	-1.36919066207888	0.171334671974111	442	-0.125222952560519	-2.61038021219887	0.00917584689619944	432	-0.0641424681477167	-1.34731352534416	0.178274790840364	442	-0.129596882441939	-2.70257676242428	0.00699253701443579	432	-0.00936572134022198	-0.300880318008997	0.763563011811187	1034	-0.0817008122201161	-2.00739447781999	0.0449159608876598	603	-0.0167199858463907	-0.5371755401145	0.591244877236067	1034	-0.0905961203341958	-2.22709766884691	0.0261051531541479	603
cg02982610	`ALOX5AP	NM_001629	TSS1500			rs116609287;rs112592252;rs9550373	49;24;1	0.003794;0.002995;0.008686		0.0150540223441842	0.315799694031145	0.752295239969281	442	-0.0452917851106073	-0.939833438778291	0.347665766974582	432	-0.00829974001486586	-0.174100813060051	0.861864737625444	442	-0.070269608531269	-1.45954711365045	0.144813645099737	432	-0.00631267677486542	-0.132417584103001	0.894713844446409	442	-0.0762422652213954	-1.5840673664875	0.113563246935863	432	-0.029229099000815	-0.93924523642558	0.347755968828709	1034	-0.0475852256362662	-1.16744785033498	0.243314578333913	603	-0.0541638819089297	-1.74170609820646	0.08170845989235	1034	-0.0841917552431719	-2.06888378102994	0.0387531474440919	603
cg02988730	`AMPD2;AMPD2;AMPD2	NM_139156;NM_004037;NM_203404	Body;Body;TSS1500			rs191695457	2	0.007987		-0.0826546954579757	-1.73774406002749	0.0826052552956175	442	-0.0481788718135186	-0.999832434177113	0.317766628810017	432	-0.0872546118089954	-1.83493434657124	0.066843433998764	442	-0.0470382961181652	-0.97612722087057	0.329371839232223	432	-0.0859751257762446	-1.80789274758578	0.0709574259581877	442	-0.0458028619643817	-0.950453385920251	0.342247005278911	432	-0.0457409585135248	-1.47044324563262	0.141607642635991	1034	-0.126508451715978	-3.11809883236056	0.00185436340910831	603	-0.0322723784637859	-1.03710245945171	0.299847141825926	1034	-0.0989270501257778	-2.43318477062735	0.0150912636686712	603
cg02994349	`SGIP1	NM_032291	TSS200	chr1:66998728-66999060	S_Shore	rs188888306;rs193237755;rs539524620;rs12081943	44;23;4;1	0.002596;0.001997;0.000998;0.008586		-0.0468403090207425	-0.983250120597878	0.325847736666004	442	-0.0800269468655244	-1.66303036241802	0.0966783584900744	432	-0.0345906819232555	-0.72586986253039	0.468215736672781	442	-0.0642798018937403	-1.33477475429254	0.182354970235741	432	-0.0320005971445352	-0.671479458138854	0.502194549884799	442	-0.0653383679909706	-1.3568182376037	0.175243481701531	432	-0.0527368616350287	-1.6957320659006	0.0900890755434328	1034	-0.133966979726582	-3.30410278948301	0.0009746231798323	603	-0.0216671981096028	-0.696162425504519	0.486449763130519	1034	-0.0898965572133389	-2.20980684397866	0.0272864386756051	603
cg03003722	`ZFAND3	NM_021943	Body			rs145138467;rs114210837	0;27	0.002396;0.001597		-0.0863848777978862	-1.81655209151183	0.0696179879019519	442	-0.1166891093404	-2.43079004910543	0.0152408182855011	432	-0.0767253849064911	-1.61257452710803	0.107208863023453	442	-0.115731404866287	-2.4106587957912	0.016103818317981	432	-0.0758392204150449	-1.59387738418248	0.111338198862434	442	-0.119654689141023	-2.49315659271253	0.0128204822561946	432	-0.0323278787697736	-1.03888725535937	0.29901633042836	1034	-0.129433080521526	-3.19099076015869	0.00144664383556631	603	-0.0216425803293293	-0.695371214273999	0.486945232010915	1034	-0.098073292425649	-2.41204958240656	0.0159916322411007	603
cg03004371	`ALDH1A3	NM_000693	Body	chr15:101419261-101421133	S_Shelf	rs76489532;rs559350610;rs76224439;rs11348272;rs62019419;rs548246803	0;1;11;48;48;51	0.046526;0.000200;0.019169;0.347244;0.500000;0.000200		-0.155211862956842	-3.28228050338029	0.00106125535504042	442	-0.060627554766459	-1.25874350309015	0.20852699269714	432	-0.13384348298564	-2.82447185580936	0.00482302622090015	442	-0.0701622756259583	-1.45731038344914	0.145429965065023	432	-0.135636803527195	-2.86278443718974	0.00428018571540468	442	-0.0667620075578566	-1.38646881550711	0.166007348461454	432	-0.020960314191206	-0.673443629978371	0.500784528431996	1034	-0.14389391910255	-3.55225668249967	0.000393211623753485	603	-0.0119276703614822	-0.383191682483133	0.701649827118578	1034	-0.125995052721761	-3.10530883477875	0.00193596623007635	603
cg03005293	`RORC	NM_005060	TSS1500			rs539523613;rs183598736	44;48	0.000399;0.000399		-0.0332880047589579	-0.69851316030791	0.485144717781468	442	-0.120588944563471	-2.51281335942105	0.0121316496107483	432	-0.0467048914230176	-0.980403349286	0.327249891133132	442	-0.143491175919973	-2.99617395241999	0.00279662918853537	432	-0.0453022378015473	-0.95091863450236	0.342002560728295	442	-0.148091243650726	-3.09363470981868	0.00202777519462958	432	-0.0328723553891479	-1.05639704361528	0.290947182343894	1034	-0.0926812629061235	-2.27864849241734	0.0228421269324223	603	-0.0399281243009397	-1.28336357614932	0.199533355744699	1034	-0.102418337699088	-2.51965116514872	0.0118563112673086	603
cg03014427	`PRPF39	NM_017922	TSS1500	chr14:45553161-45553421	N_Shore	rs10134805;rs534088384	49;19	0.030950;0.000200		-0.0534427643611253	-1.12209397925376	0.262207206729362	442	-0.0858475006961448	-1.78456426927294	0.0746793422289375	432	-0.0552667639156895	-1.16046790092055	0.246247022631405	442	-0.0902723639012748	-1.87703742911702	0.0608383233841286	432	-0.0520420802423087	-1.09263101745666	0.274936951161502	442	-0.0966635970790918	-2.01073737014114	0.0446434683198598	432	-0.0271229825949695	-0.871532977932791	0.383607589756745	1034	-0.0628670034672571	-1.54323877550059	0.123052156222242	603	-0.0282317761720366	-0.907180012569335	0.364459665185432	1034	-0.0669002919305006	-1.64253421713072	0.100748064434801	603
cg03036214	`CA12;CA12	NM_001218;NM_206925	Body;Body			rs569821831	13	0.0002		0.00777625244656861	0.163119335431964	0.870498074243764	442	-0.0611885079880854	-1.27041899056978	0.204339783446677	432	-0.00850067900696107	-0.178316042372692	0.858555164485826	442	-0.0689700468945291	-1.43246757372501	0.15241112467626	432	-0.00471041317848667	-0.098807191184739	0.921336066492073	442	-0.0724651345945463	-1.50530760183281	0.132639776257505	432	-0.0433936448558987	-1.39488625561285	0.163218147658858	1034	-0.0898597423254461	-2.20889696583785	0.0273498588585658	603	-0.0416654206683967	-1.33926685772864	0.180652509567529	1034	-0.0958315464334666	-2.35657099369098	0.0185835272573795	603
cg03038262	`IFITM1	NM_003641	3'UTR	chr11:315739-316539	N_Shore	rs544220122	7	0.0002		0.0407240268256059	0.854707097792151	0.39304762763177	442	0.113965107789763	2.37354250143568	0.017808200282505	432	0.0283681322953357	0.595214663945222	0.551952643288457	442	0.11506068246312	2.39656269226175	0.0167334237624233	432	0.0288134134877189	0.604562602496947	0.54572570156874	442	0.117093821517644	2.43929859707745	0.0148884993539914	432	0.0742295892680694	2.38900179449955	0.0169715253254319	1034	0.103163280227562	2.53810867777144	0.0112513686417185	603	0.0788094121388937	2.53699428588624	0.011242687665675	1034	0.103925336958628	2.55699319807469	0.010660976355771	603
cg03040622	`MIR589;FBXL18	NR_030318;NM_024963	TSS1500;Body	chr7:5539957-5541567	N_Shelf	rs544503858;rs138023232;rs192049463	0;1;30	0.000200;0.001597;0.010583		-0.148351774036836	-3.13498815206958	0.00176355173232665	442	-0.0967861265042418	-2.01330219006607	0.0443724116597851	432	-0.129402376532258	-2.72967188292985	0.00644402384989833	442	-0.0642242575851758	-1.33361818831688	0.182733922831832	432	-0.127923122820118	-2.69812048403756	0.00708365206029436	442	-0.0701975526089792	-1.45804552326432	0.145227179457255	432	-0.0818308085380189	-2.63468622867461	0.00847405132922432	1034	-0.198343431231993	-4.92776078832021	9.14102390188113e-07	603	-0.0372500051885097	-1.19720129352608	0.23139509994482	1034	-0.150035557499406	-3.70614510473557	0.000217658468009717	603
cg03045323	`C19orf39	NM_175871	TSS1500	chr19:11485286-11485769	N_Shore	rs560259045;rs527665663	51;13	0.000200;0.000799		-0.0330621491803333	-0.693770353837128	0.488113069493871	442	-0.0174536611760828	-0.361963579388156	0.717543330287143	432	-0.0596065019922072	-1.25180046311861	0.211037153192603	442	-0.0579323766731578	-1.20265797523488	0.22950982309531	432	-0.0593203862863827	-1.24577755298445	0.213240406480054	442	-0.0595025225696162	-1.23532986448134	0.217110791792355	432	-0.0400134465827566	-1.28610891984063	0.19857370017865	1034	-0.107053548009234	-2.63454530229614	0.00851533730283388	603	-0.0497436924188379	-1.59932403436018	0.109908028546608	1034	-0.108554571019656	-2.67177602590867	0.00762975352248152	603
cg03048029	`SYNJ1;SYNJ1;SYNJ1;SYNJ1	NM_001160306;NM_203446;NM_001160302;NM_003895	TSS1500;TSS1500;TSS1500;TSS1500	chr21:34099716-34100796	S_Shore					-0.00786415756198681	-0.164963361462682	0.869047242621267	442	-0.0770353437769219	-1.60061015852449	0.109845685971658	432	-0.0230465335867562	-0.483513783977677	0.628941128764551	442	-0.0949098292085373	-1.97403369611556	0.0486781047868901	432	-0.0213927694266823	-0.448806991182755	0.6537671617237	442	-0.100395360043038	-2.08887955712283	0.0369872191889265	432	-0.0273516986660612	-0.878885881045201	0.379608316389112	1034	-0.0865304421004738	-2.12663825011366	0.0336347406640645	603	-0.0293560461980825	-0.943326886550329	0.345665222032605	1034	-0.0841129112840793	-2.06693711205196	0.0389366212848378	603
cg03051880	`MAN1A1	NM_005907	Body							-0.0817795914493967	-1.71926279522864	0.0859195726725006	442	-0.0857014740082693	-1.78151375196103	0.0751765636619162	432	-0.0896676041263109	-1.88594893386404	0.0596176156941896	442	-0.0775075680918269	-1.61046123006899	0.107678071787565	432	-0.0909864305437862	-1.91384044032283	0.0559493857270223	442	-0.0751106619105279	-1.56046677937722	0.119037760981817	432	-0.00912194631323182	-0.293048435289828	0.76954093794345	1034	-0.0796317238789586	-1.95633790744349	0.0506434792086279	603	-0.0414322002460394	-1.33176175225242	0.183107221194329	1034	-0.0984274422666627	-2.42081629886999	0.0156125826561636	603
cg03052794	`C19orf22	NM_138774	Body	chr19:911689-911996	N_Shelf					-0.126510952258356	-2.66801124593074	0.00774667579143699	442	-0.112607407965944	-2.34502261623015	0.0192233835623109	432	-0.127923508022153	-2.69812869852862	0.00708347835666658	442	-0.0945995436599063	-1.9675411852919	0.0494227827459868	432	-0.125571637746485	-2.647989950469	0.00821784723437088	442	-0.101079767220167	-2.10321722647771	0.0357114266607176	432	-0.0622868372148371	-2.00354319946723	0.045240723513624	1034	-0.0818136765235914	-2.01017999934767	0.0446198823638299	603	-0.0355563995335738	-1.14272241560556	0.253318859127162	1034	-0.071516670842875	-1.75625102547498	0.0792984853099512	603
cg03063658	`SH3RF3	NM_001099289	Body			rs561812421	30	0.0002		-0.0289326884909656	-0.607066623560193	0.544063641233831	442	-0.041120426439563	-0.853172401717973	0.393905378824174	432	-0.0503922967042908	-1.05793384041069	0.290461825428167	442	-0.0809475447465905	-1.68224476244471	0.0928898557436782	432	-0.048825903391505	-1.02499582776838	0.305736097981007	442	-0.0855726208445136	-1.77882205578103	0.0756175431048105	432	0.0148392159069764	0.476741197468244	0.633634892109953	1034	-0.074361111465175	-1.82635635887672	0.068038181489629	603	-0.00354121504511659	-0.113761147661605	0.909449076456874	1034	-0.0862207511330862	-2.11898901366904	0.034277521330507	603
cg03066323	`PILRA;PILRA;PILRA	NM_178273;NM_178272;NM_013439	TSS1500;TSS1500;TSS1500			rs574571775;rs541990319	2;1	0.000200;0.000200		-0.0216215100714416	-0.453607315870996	0.650309691535713	442	-0.0568127830931824	-1.1793649144189	0.238652266634301	432	-0.0153693688907475	-0.322415990033871	0.747281101671514	442	-0.0753273271130609	-1.56498520947363	0.117973914742092	432	-0.0144825701637329	-0.30381019670109	0.761408024209533	442	-0.0805608742427129	-1.67417396045908	0.0944663857425554	432	-0.0342450807138365	-1.10054523694558	0.271257576586868	1034	-0.0710535358278587	-1.74483914056476	0.0812675437190932	603	-0.0290270026537632	-0.932747427379639	0.351100908403972	1034	-0.0641526224509153	-1.57488375664379	0.115559569178945	603
cg03066986	`			chr6:42750449-42751432	S_Shore	rs529222824	4	0.0002		-0.12679487087524	-2.67406386291196	0.00760908642187429	442	-0.177759522710394	-3.72567804869022	0.00020435264896907	432	-0.0953891087586698	-2.00700095565341	0.0450342188618826	442	-0.150085002982415	-3.13591804152057	0.00175906567118978	432	-0.093020337291806	-1.95686825777418	0.0506607996134363	442	-0.156200894209852	-3.26578606900126	0.00112523872689966	432	-0.0942290780932293	-3.03609353960273	0.00242052254392426	1034	-0.0584026691516482	-1.43339022195031	0.152033270648218	603	-0.0837586966516889	-2.69704666430963	0.00704282537306493	1034	-0.0426144105098005	-1.04533819584427	0.296140718333432	603
cg03078586	`FTL	NM_000146	Body	chr19:49468372-49469376	S_Shore	rs1803578;rs73046709;rs373178636;rs3211588	31;33;47;50	0.000200;0.000599;0.002196;0.009409		0.0130426266155074	0.273599958697895	0.784514490258842	442	-0.081014555037567	-1.68364349017331	0.0926187938500651	432	-0.00720749358388217	-0.151188278888783	0.879895454287085	442	-0.087105408311289	-1.81084533479673	0.0705061189648546	432	-0.0053081343187278	-0.111345410589862	0.91139280555713	442	-0.0858186768556268	-1.78396212923661	0.0747772748862281	432	-0.0178472121110172	-0.573398234118115	0.566479407303857	1034	-0.0647096077710036	-1.58859534181453	0.112426658531123	603	-0.0382214491109522	-1.22845319800573	0.219444690177934	1034	-0.0970821001833608	-2.3875166154522	0.017095738981051	603
cg03078972	`SNAI1	NM_005985	TSS1500	chr20:48598959-48599657	N_Shore	rs574305142;rs541292067	27;1	0.000200;0.000200		-0.0707511530208382	-1.48657248391087	0.137515403255767	442	-0.126822830805949	-2.64409139447989	0.00831535978435579	432	-0.0555212890362315	-1.16582329794591	0.244075044654348	442	-0.128469791260032	-2.67880917873495	0.00750542054029823	432	-0.0552010271022585	-1.15908477426894	0.246810171606475	442	-0.13030778739947	-2.71757162951654	0.00668539670489173	432	-0.058420995002994	-1.87889977551508	0.060393515019542	1034	-0.121652785713193	-2.99719909228338	0.0027694306844576	603	-0.0429951919901616	-1.38206212731331	0.167120856359917	1034	-0.0879261816416338	-2.16111757688889	0.0308639107337823	603
cg03098937	`CAMKV	NM_024046	5'UTR	chr3:49906737-49907482	Island	rs538342158;rs6446187;rs17050879	1;16;48	0.000200;0.402955;0.000599		-0.0892031833435523	-1.8761286114459	0.0609558046994822	442	-0.1284049373737	-2.67744178315239	0.00753593004457704	432	-0.0767694690721832	-1.61350472338092	0.107006640666116	442	-0.100151802366233	-2.08377773990911	0.0374504665931597	432	-0.0737659006562626	-1.55014232986954	0.121488006333007	442	-0.106223836536063	-2.21104564198863	0.0272670419437316	432	-0.0661773132884167	-2.12904173489034	0.0333579902188819	1034	-0.034400555184702	-0.843672882173345	0.399094882756267	603	-0.0469415415691737	-1.50909469343322	0.131438903744113	1034	-0.0150935636918364	-0.370051365137497	0.711464120704983	603
cg03123320	`					rs142949517;rs577550619	43;48	0.000200;0.000200		-0.0581068035899843	-1.22023316559166	0.222769584572228	442	-0.0628019822267431	-1.30400579978601	0.192636550292503	432	-0.0665172555943193	-1.39734102791231	0.162704958180495	442	-0.0772888817581414	-1.60589912449109	0.108677657198882	432	-0.0651685187146913	-1.36892649494479	0.171417248575212	442	-0.0774393149445463	-1.60903735640191	0.107989265813187	432	-0.0425988655759288	-1.369306875134	0.171071785255419	1034	-0.0796260378297136	-1.95619762272122	0.0506600228578117	603	-0.0508661328267187	-1.63547364295872	0.102106785237116	1034	-0.0864970561886649	-2.12581361231714	0.0337035367522182	603
cg03131366	`					rs555998549;rs570978241;rs538248954;rs111367667	42;37;11;2	0.000599;0.000399;0.000399;0.000200		-0.150886277072011	-3.18936974639301	0.00146538597780296	442	-0.0690342648775107	-1.43380559688977	0.152028730430682	432	-0.141475783097907	-2.9876616623127	0.00287362792331977	442	-0.0668756873435531	-1.38883670175883	0.165285866007657	432	-0.142327309845332	-3.00589049593277	0.00270806216328682	442	-0.0710367318520662	-1.47553432830723	0.140466633368917	432	-0.06753960448858	-2.17300151790146	0.029882232723538	1034	-0.133939436918663	-3.30341523208695	0.000977000480301302	603	-0.0468236496502131	-1.50529910157597	0.132411683795013	1034	-0.106013343341893	-2.60875162688793	0.00918170973088579	603
cg03147185	`NCAPH	NM_015341	Body			rs576025012;rs575468653	24;28	0.000200;0.000799		0.119812380687451	2.52533604587365	0.0117066822326735	442	0.138087636753552	2.88185753799237	0.00403299282474948	432	0.0514145226189334	1.07943193893525	0.280774551957318	442	0.0815037806703298	1.69385572091907	0.0906589649544829	432	0.0545327221864362	1.14502396326054	0.25258641450196	442	0.0781815963971789	1.62452339263599	0.10464276678007	432	0.0766949389940702	2.46865418092344	0.0136309886448579	1034	0.13930050552274	3.43734356415103	0.000602887367211548	603	0.0347447009735804	1.11661453744266	0.264322953170487	1034	0.0729916295013488	1.79259985313709	0.073284110291316	603
cg03152187	`SEPT9;SEPT9;SEPT9;SEPT9;SEPT9	NM_001113492;NM_001113493;NM_001113491;NM_006640;NM_001113494	Body;Body;Body;Body;Body			rs312913;rs542058121;rs561884090;rs575389571	11;21;32;41	0.010184;0.000200;0.000200;0.002596		-0.141393907237863	-2.98590916311178	0.00289002310478303	442	-0.145783660752617	-3.04472769627284	0.00238533082091271	432	-0.0854288867422878	-1.79634996079826	0.0727756979186049	442	-0.104816364294064	-2.18153104122015	0.0293868060567799	432	-0.0858587571087239	-1.80543362526557	0.0713416395731245	442	-0.107127648365556	-2.23000321610741	0.025976293576572	432	-0.103440987994665	-3.33494539533154	0.000864875993752419	1034	-0.149339936738188	-3.6887008889306	0.000233006761115689	603	-0.0664852231584353	-2.13897697811566	0.0325435513822319	1034	-0.0994704045486795	-2.44663764993107	0.0145417157350479	603
cg03158561	`RPL27A;SNORA45	NM_000990;NR_002977	Body;TSS1500	chr11:8703783-8704616	S_Shore	rs139529507;rs111226016;rs567756662	24;30;34	0.000399;0.000799;0.000799		0.0930783611735783	1.95809600706275	0.0505162699602515	442	0.169929606758231	3.55825257226516	0.000388874821472777	432	0.0278235421748726	0.583782220425086	0.559615315781399	442	0.114090497362771	2.37617688815753	0.0176822108449839	432	0.0292545099591857	0.613822926474966	0.5395917116465	442	0.113918071715782	2.37255431128358	0.0178556631471507	432	0.0907160844871872	2.92226599359675	0.00350539657685068	1034	0.188373371380975	4.67384610874839	3.19495146127593e-06	603	0.0405800940453331	1.30434193958198	0.19228576524357	1034	0.123174909201669	3.03508209857944	0.0024458634499021	603
cg03159883	`			chr6:14211081-14211744	S_Shelf	rs561401135;rs574905312;rs543829882	1;6;43	0.000200;0.000200;0.000200		-0.0194217458113709	-0.407445212248198	0.683860381769031	442	-0.109566967465012	-2.28118689243876	0.0227522476307127	432	-0.0263865370533373	-0.553617179744536	0.580078116304914	442	-0.143557070282881	-2.99756910602421	0.00278395821301035	432	-0.0251580202060704	-0.527830461897116	0.597844453275911	442	-0.148159656410427	-3.09508517180106	0.00201796524963668	432	0.00699756619994143	0.22479878163251	0.822178888704788	1034	-0.126264336173863	-3.11201711989138	0.00189276329423898	603	-0.00349900362160262	-0.112405099143454	0.910523890227261	1034	-0.124529507336454	-3.06880781678544	0.0021873377924917	603
cg03162410	`TECR	NM_138501	Body			rs1609865;rs145829022	36;35	0.227236;0.000799		-0.0860527646255273	-1.80953345241703	0.0707020279019503	442	-0.132401409986101	-2.7617481518377	0.00584983982766998	432	-0.0735658032179584	-1.54592214910273	0.12250454523178	442	-0.145576031934763	-3.04032885860105	0.00242017034429814	432	-0.073021427097352	-1.53444154569895	0.125303626069239	442	-0.151348382727871	-3.16272497898069	0.00160611106589684	432	-0.0552243526097547	-1.77587568129206	0.0758989088349891	1034	-0.123802079470983	-3.05069546181927	0.00232288477354083	603	-0.0455064579295892	-1.46289425797782	0.143662481493158	1034	-0.106480869509751	-2.62034403226098	0.00887666447193903	603
cg03173502	`JARID2	NM_004973	Body			rs572932801;rs541834830	46;40	0.000200;0.000200		-0.0935540668481578	-1.96816214878625	0.0493442854782412	442	-0.0944802375434397	-1.96504488963297	0.0497116383872164	432	-0.0784878224255175	-1.64976774500719	0.0993562892775359	442	-0.0829890059784668	-1.72486376724786	0.0849121434349491	432	-0.0755424696478556	-1.58761682010606	0.11274861665627	442	-0.0854688977377467	-1.77665536088486	0.0759740452493649	432	-0.0664481499168526	-2.13778072441153	0.0326407028235744	1034	-0.134748718702774	-3.32361967658755	0.000909336552591073	603	-0.0621387823797691	-1.9987684937054	0.0457556572149481	1034	-0.135030627077235	-3.33065882425659	0.000886802307221091	603
cg03180322	`IL16;IL16	NM_004513;NM_172217	3'UTR;3'UTR							-0.0703086324883752	-1.47724368898566	0.139998824185849	442	-0.088317958855214	-1.83618426220921	0.0666657580131291	432	-0.0623790089546778	-1.31017425503661	0.190532669819918	442	-0.0916508560494347	-1.90586094157973	0.0569863234498977	432	-0.0612654043031315	-1.2867254634027	0.198585526687932	442	-0.0970390356636523	-2.01859634904441	0.0438173066369225	432	-0.0429940131097625	-1.38202418593118	0.167132506073552	1034	-0.117906732490867	-2.90402658972421	0.00373834048089682	603	-0.0305121558071792	-0.980499939670938	0.326994126317536	1034	-0.0907965520578984	-2.2320520669836	0.025774937987678	603
cg03195667	`YPEL2	NM_001005404	TSS1500	chr17:57408787-57410145	N_Shore	rs547081984	46	0.0002		-0.0608419820525672	-1.27781045202802	0.201711623093207	442	-0.167911313731918	-3.51517104746886	0.000456994988052452	432	-0.0472146337318488	-0.991119425694396	0.32199215053735	442	-0.152290941566887	-3.18273142956614	0.00150005162267477	432	-0.0464852339917969	-0.975785750851307	0.329532579690816	442	-0.156138546301599	-3.26446087512892	0.00113046818926012	432	-0.0384244858806993	-1.23498529824755	0.21700391551428	1034	-0.100411098015257	-2.4699317000786	0.0136318221053731	603	-0.0117314384131032	-0.376886896561789	0.706328716411161	1034	-0.0621565229664642	-1.52575280087513	0.127352256479833	603
cg03202732	`MARK2;MARK2;MARK2;MARK2;MARK2	NM_017490;NM_004954;NM_001039469;NM_001163297;NM_001163296	TSS1500;Body;Body;Body;Body			rs556004773;rs569818804;rs538475964;rs143676267;rs186927733	35;14;8;2;1	0.002596;0.000200;0.000200;0.003794;0.000200		-0.0707102015928075	-1.48570916045007	0.137743791107351	442	-0.0814971100355669	-1.69371647074796	0.0906854620718339	432	-0.0555836752925035	-1.1671359741194	0.243544726723615	442	-0.0737983919227992	-1.5331032767869	0.12564203121213	432	-0.0534273320633304	-1.12176934170524	0.262345210956208	442	-0.0783003692065473	-1.62700148807117	0.104114990147331	432	-0.0075581752846502	-0.242809166578473	0.808199692369142	1034	-0.0707104922287782	-1.73638685680405	0.0827513930917777	603	-0.00458540603714664	-0.147306086233706	0.882918794006239	1034	-0.0515895289600941	-1.26585666400128	0.205853634201516	603
cg03211864	`BTBD16	NM_144587	Body							-0.143679908987099	-3.03485518857605	0.00246285514076566	442	-0.0717406557724672	-1.49020597781455	0.136566390444385	432	-0.136184382065575	-2.8744867024335	0.00412580130931419	442	-0.105776520283172	-2.20166448757483	0.0279260111634248	432	-0.13650510155422	-2.88134160308576	0.00403773360197453	442	-0.103187732873797	-2.147389726402	0.0320145092227408	432	-0.0302016811401133	-0.970516816543544	0.331942836574395	1034	-0.108468520662272	-2.66964134006114	0.00767820477370929	603	-0.0278324467683487	-0.894341563974687	0.371285930516353	1034	-0.0976394312543688	-2.40131050893085	0.0164669792529948	603
cg03214730	`ZFHX3;ZFHX3	NM_006885;NM_001164766	5'UTR;5'UTR	chr16:73081590-73082565	N_Shore	rs60602157	46	0.285543		-0.025023580992868	-0.52500866470835	0.59980352347584	442	-0.089935581305523	-1.86999659389151	0.061811401168654	432	-0.0209380011140793	-0.439263415145993	0.66066307814617	442	-0.0834888355572034	-1.73530076926033	0.0830455139837032	432	-0.01934511118784	-0.405837106629599	0.685040983074665	442	-0.0889054101193794	-1.84846231893828	0.0648678814809815	432	-0.0425544456531744	-1.36787730443266	0.171518918637659	1034	-0.070060891062722	-1.72038239947894	0.0856212441610158	603	-0.0352127412504276	-1.13166863664401	0.257938275716927	1034	-0.0572752420622073	-1.40565823106093	0.160113738763239	603
cg03218374	`ANGPT4	NM_015985	TSS200			rs143249851;rs546611448;rs566436092	10;25;44	0.002596;0.000200;0.000399		0.0996063504331113	2.09631167121212	0.036315062498999	442	0.211357030146792	4.44986212558981	9.4061094982124e-06	432	0.0383346351660258	0.804508332488781	0.421424187443079	442	0.13553578296877	2.82793178794139	0.00477358056411253	432	0.0386151420704716	0.810401018037672	0.41803211607482	442	0.133190102021453	2.778396406082	0.00556024851638062	432	0.0887463679273059	2.85847568687167	0.00429148151926397	1034	0.166920065868017	4.13074906309954	3.79978776228531e-05	603	0.0703189743168042	2.26271440464697	0.0237448721289714	1034	0.142007926331202	3.50505645108001	0.000469358657360622	603
cg03227037	`			chr20:62209387-62209643	S_Shelf	rs566182907;rs536323289	39;22	0.000200;0.000200		-0.0872602344814312	-1.83505319362786	0.0668257966311141	442	-0.0994507785366854	-2.06909475283434	0.0388113657674839	432	-0.0574619399065014	-1.20666107269858	0.227954964385058	442	-0.0761483504385755	-1.58210853566693	0.114009935734314	432	-0.0579700694737494	-1.21735531263514	0.223861980069429	442	-0.074184420512023	-1.54115220176672	0.123670384784677	432	-0.0755187020905595	-2.43064770904926	0.0151446494892291	1034	-0.119904805303713	-2.95371245194841	0.00318880838117607	603	-0.0603144056018509	-1.93994028777634	0.0525157521905492	1034	-0.0965040988463146	-2.37321272631809	0.0177699151505471	603
cg03236948	`DNAJC4	NM_005528	TSS1500	chr11:63997662-63998412	N_Shore	rs372758130;rs374705660;rs118176767	15;21;32	0.000200;0.000399;0.002995		-0.0288610213392085	-0.605562064352423	0.54506200000625	442	-0.0517547389185469	-1.07416886709866	0.283134400549498	432	-0.0354559878662895	-0.744042966004831	0.457153340822546	442	-0.0474141275167038	-0.983938047321908	0.325517943092549	432	-0.0325127208317888	-0.682233044486938	0.495374616397701	442	-0.0517385431463768	-1.07383212271343	0.283285278393578	432	-0.0581190151213701	-1.86916569414539	0.0617361113431807	1034	-0.0755914210159218	-1.85668828126951	0.0635918705863535	603	-0.051706058688725	-1.66252721665064	0.0965621362958228	1034	-0.0642051468052578	-1.57617673269556	0.115261239166229	603
cg03254465	`PRDM16;PRDM16	NM_022114;NM_199454	Body;Body	chr1:3239915-3240261	Island	rs870465	30	0.159345		-0.0483876874813185	-1.01578196427594	0.310102582840088	442	-0.105833005073754	-2.20284904178966	0.0278420523235025	432	-0.0326268151750361	-0.68462884906906	0.493861968283408	442	-0.0924330145273195	-1.92221870419742	0.0548921051848359	432	-0.0309172267956608	-0.648731975405024	0.516783274994594	442	-0.096963368605964	-2.0170123796016	0.0439827707299895	432	-0.0729764480067543	-2.34852565520777	0.018929695734065	1034	-0.130277470463188	-3.21204628183989	0.0013452998590755	603	-0.0457865828071294	-1.47191199099624	0.141210487653235	1034	-0.103357730985654	-2.54292707398614	0.0110980315997408	603
cg03260624	`CDC7;CDC7;CDC7	NM_003503;NM_001134420;NM_001134419	Body;Body;Body	chr1:91966263-91966999	S_Shelf	rs572645853	24	0.0002		0.0640379934615216	1.34511300708059	0.178984294105688	442	0.0588994122375497	1.22277951617486	0.221815355827573	432	0.0410812514631308	0.862212862423458	0.3889066279046	442	0.039698742427616	0.823643510830021	0.410475769225007	432	0.0426335002154089	0.894830260520978	0.371222121448588	442	0.032917082213734	0.682829839332477	0.495004168727755	432	0.0646915452556386	2.08110654679905	0.037536936693855	1034	0.11355965092149	2.79600959760976	0.00524113202357536	603	0.0519858660076119	1.67154018567763	0.0947693707177222	1034	0.0911070889749773	2.23972847418204	0.0252704397359197	603
cg03266686	`					rs568551524;rs116709954	7;38	0.000200;0.000799		-0.117429895099431	-2.47464734176545	0.013496818312637	442	-0.0899768789705335	-1.87085994685886	0.0616913921559461	432	-0.0932060845776042	-1.96079860208374	0.0501993410186011	442	-0.0808985133962221	-1.68122132470358	0.0930885931415694	432	-0.091184825997887	-1.918036834258	0.0554141221780534	442	-0.0851307031530526	-1.76959100801727	0.0771459402222941	432	-0.0367427114258751	-1.1808822680708	0.237815971062825	1034	-0.0598713909182735	-1.46952274748275	0.141975977028353	603	-0.0145785899420239	-0.468366839871192	0.639609323189075	1034	-0.0335888414728228	-0.823750451674514	0.410320105719822	603
cg03278564	`					rs533442792;rs188786398	0;3	0.000200;0.000200		-0.027733462696035	-0.581891238167559	0.56088772140291	442	-0.0652566363528918	-1.35511615701341	0.175785101840612	432	-0.0293442483690212	-0.615706912556029	0.538348013577392	442	-0.0861687223048631	-1.7912749035974	0.0735950005561652	432	-0.0289315420485236	-0.607042555434011	0.544079604607356	442	-0.0906771035178875	-1.88549955680734	0.0596856637253392	432	-0.0249755376589487	-0.802499961686263	0.422400334519405	1034	-0.0754078109819812	-1.85216122083084	0.0642398212359588	603	-0.0320245407550212	-1.02913249614471	0.303575890009913	1034	-0.0843458711603098	-2.07268900094101	0.0383966274176065	603
cg03296761	`MTP18;MTP18	NM_001003704;NM_016498	Body;Body	chr22:30821625-30822010	S_Shore	rs2072158;rs182532162	51;12	0.295927;0.000599		0.0507528474522961	1.06551620934152	0.28701974200503	442	0.113956035522476	2.37335189954817	0.017817346284607	432	0.013216100804745	0.277239411368609	0.781720288835765	442	0.0910712611559716	1.89374104281956	0.0585805501310818	432	0.0134229346535696	0.281578764641777	0.778392422031245	442	0.0946926269613384	1.96948884865199	0.0491983915851578	432	0.0681780724365247	2.19360703089073	0.0283632887844829	1034	0.133989718890341	3.30467043630785	0.000972664523928552	603	0.0478129653863606	1.53715195086529	0.124419073877254	1034	0.0952554560671389	2.34231785369759	0.0193061108824528	603
cg03301240	`SPI1;SPI1	NM_001080547;NM_003120	TSS1500;TSS1500	chr11:47399788-47400006	S_Shore					0.00645277171415029	0.135356360069216	0.892391283415461	442	-0.0435917774152784	-0.904511557073014	0.366078845274454	432	-0.0238736147981028	-0.500872340538673	0.616677956762294	442	-0.108759683606191	-2.26424480445864	0.0237786018915269	432	-0.0236071789494563	-0.495280383331799	0.620617010247965	442	-0.111417401584863	-2.32003257102991	0.020543334226096	432	-0.00531603288082981	-0.170777872233594	0.864431272233876	1034	-0.0961670835515029	-2.36487330029838	0.018173638523479	603	-0.025226847302903	-0.810578312850146	0.417745368030476	1034	-0.110393971872984	-2.71741648904327	0.00665737614419874	603
cg03311274	`					rs546272527;rs566499293;rs28540583;rs17821232;rs568776834	43;24;19;18;13	0.000399;0.001198;0.000200;0.062500;0.000200		-0.0309902126544191	-0.650264407968697	0.515793614631346	442	-0.0196615269911839	-0.407762650490236	0.683631596593768	432	-0.0507786912746734	-1.06605971463506	0.286774076192501	442	-0.0852524193564861	-1.7721334207548	0.0767224957899501	432	-0.0524229209683367	-1.10064145436585	0.271434880142567	442	-0.0876793151887205	-1.8228377123248	0.0686664916828265	432	-0.0112973124388444	-0.362938855752339	0.716719115361826	1034	-0.101653607837324	-2.50070634016933	0.0125070762543006	603	-0.0296552376101878	-0.952946712831688	0.340769431488341	1034	-0.109167413742112	-2.68698023113806	0.00729252220041762	603
cg03339910	`RTEL1;RTEL1	NM_016434;NM_032957	Body;Body	chr20:62318359-62318658	Island	rs572149742;rs540789382	0;11	0.000200;0.000399		-0.0963495265727433	-2.02733372831142	0.0429075156342336	442	-0.0995901544931589	-2.07201382562728	0.0385375091239747	432	-0.074036912255173	-1.55585833465388	0.120121704731089	442	-0.0634652567184809	-1.31781479353113	0.187970645032155	432	-0.0732017474465571	-1.53824430416528	0.124371002048346	442	-0.0642461873924618	-1.33407481861097	0.182584236668596	432	-0.0881531147265715	-2.83926729740793	0.00455773563218232	1034	-0.119040319372253	-2.93221243273729	0.00341686534557388	603	-0.0552156710654188	-1.77559593577762	0.0759450649806046	1034	-0.0780400788625509	-1.91707421398128	0.0554539806509169	603
cg03345925	`ZC3H3	NM_015117	Body	chr8:144601691-144601895	N_Shelf	rs368742490;rs189671249;rs180698917;rs574369846	1;4;15;16	0.000799;0.003594;0.000200;0.000399		-0.169575222167571	-3.59173561039423	0.000342298533641537	442	-0.14583181373912	-3.04574790743716	0.00237731652607973	432	-0.141614387794302	-2.99062849957522	0.0028460658780557	442	-0.112098371319546	-2.33433205867805	0.0197786828335735	432	-0.139482368062415	-2.94500563056192	0.00329781165959235	442	-0.112232546379251	-2.33714982247957	0.0196309753892646	432	-0.0734409320842232	-2.36352749606394	0.0181820038209612	1034	-0.134332913912665	-3.31323817880493	0.000943541309058056	603	-0.0397404841208058	-1.27732610088175	0.201655715881416	1034	-0.0825492951103617	-2.02833653708083	0.0427300945337268	603
cg03348792	`KRT1	NM_006121	TSS1500			rs148588180;rs142759772;rs561530406	1;36;39	0.001398;0.000399;0.000200		-0.160846531023462	-3.40350194197782	0.000688409523380842	442	-0.0801884684528675	-1.66640137798095	0.0960048882735567	432	-0.14277125074179	-3.01539583012407	0.00262523404878512	442	-0.0721994404520253	-1.49976907343721	0.134069574497234	432	-0.142645639605001	-3.01270621274484	0.00264843260713905	442	-0.0722913711530002	-1.50168539105352	0.133573523526946	432	-0.0587228108051755	-1.88862891227226	0.0590758866316769	1034	-0.0957261281588184	-2.35396270556368	0.0187139601336466	603	-0.0319433541267767	-1.0265217247064	0.304804014221237	1034	-0.0582448024066734	-1.42950686125125	0.153145708027314	603
cg03393444	`MADD;MADD;MADD;MADD;MADD;MADD;MADD;MADD;MADD;MADD	NM_130474;NM_001135944;NM_130473;NM_130471;NM_001135943;NM_130470;NM_003682;NM_130472;NM_130476;NM_130475	5'UTR;5'UTR;5'UTR;5'UTR;5'UTR;5'UTR;5'UTR;5'UTR;5'UTR;5'UTR	chr11:47291200-47291858	S_Shore	rs564563665;rs549282348	28;29	0.000799;0.000799		-0.0605042585990428	-1.27070013032161	0.204230529494402	442	-0.0949179578764307	-1.97420378805892	0.0486587230688609	432	-0.0652447250260883	-1.37053183778206	0.170915890740224	442	-0.13186920118325	-2.75051592314452	0.00605283912790269	432	-0.0637340391570994	-1.33871107877421	0.18106039294116	442	-0.136388723139683	-2.84595184697069	0.00451341096668532	432	-0.033215917520876	-1.06744595812976	0.285931531172282	1034	-0.0720607328625283	-1.76965796441231	0.0770349812091321	603	-0.0164192383282373	-0.527511445863329	0.59793540455315	1034	-0.064895687491254	-1.59317637977756	0.111395020475978	603
cg03403093	`INPP4A;INPP4A;INPP4A;INPP4A	NM_001566;NM_004027;NM_001134224;NM_001134225	5'UTR;5'UTR;5'UTR;5'UTR			rs531830138	17	0.0002		-0.0773816992116127	-1.62642371871481	0.104229253307934	442	-0.144166145560203	-3.01046607804994	0.0026692876553754	432	-0.0609937452499423	-1.28100572131888	0.200587080310209	442	-0.130550408556812	-2.72268979794337	0.00658337434936122	432	-0.0568583648591603	-1.19395887362482	0.232885459135974	442	-0.136185335757107	-2.84165449677797	0.00457425964417947	432	-0.082639900954511	-2.66085509825572	0.00784445436308538	1034	-0.101641596063861	-2.50040879360216	0.0125175448042795	603	-0.0610349554589797	-1.96317330815789	0.0497522821154671	1034	-0.083979410562913	-2.06364101883579	0.0392489623675546	603
cg03417473	`MOV10;MOV10	NM_001130079;NM_020963	TSS1500;TSS1500	chr1:113217475-113218097	N_Shore					-0.0673674819127051	-1.41525580788268	0.157386508539508	442	-0.0798132077809811	-1.65856968307427	0.0975753340347762	432	-0.0727153737475579	-1.52798744642123	0.126898969483022	442	-0.0815060921055046	-1.69390397239621	0.0906497849119794	432	-0.0706435979706642	-1.48430505727495	0.138115864598314	442	-0.0869757537204335	-1.80813623566838	0.070927250148494	432	-0.0258596738522757	-0.83092098527395	0.40615814312258	1034	-0.0964113069883009	-2.37091654205338	0.0178802843724288	603	-0.0255530739295815	-0.82106502424942	0.411747962226888	1034	-0.0980828201466709	-2.41228542601012	0.0159813299347132	603
cg03423813	`KLHL29	NM_052920	Body			rs566557315;rs74479642	4;1	0.000200;0.018770		-0.101154944145611	-2.12912589895603	0.0334953637914743	442	-0.0501676162992182	-1.041171890462	0.298178075649626	432	-0.0870484700518315	-1.83057718624079	0.0674927073782489	442	-0.0322700372864739	-0.669398160663409	0.503526710186801	432	-0.0874317072903966	-1.83867769006045	0.0662897469685688	442	-0.0345507830386922	-0.716745583633854	0.47383221831937	432	-0.053631559230814	-1.72455553945809	0.084757657418504	1034	-0.175189866718741	-4.33959793326733	1.51462897714571e-05	603	-0.0402824146839961	-1.29476340452063	0.195570563815604	1034	-0.1538292537873	-3.80134641260323	0.000149320868239498	603
cg03428047	`MAML3	NM_018717	Body			rs545447405;rs142926976;rs572952047;rs540863157;rs562256200	0;1;21;30;34	0.000200;0.000200;0.000200;0.000799;0.000399		-0.0473154742038414	-0.993239409294052	0.320958577004853	442	-0.00802850264619598	-0.166486151397257	0.867851229700245	432	-0.0705194364175497	-1.48168758295717	0.138811539003292	442	-0.0421391580690701	-0.874333946045263	0.382283595989539	432	-0.0704297485919078	-1.47979688478328	0.139315728713304	442	-0.0441216086160644	-0.915519543821309	0.360276186896882	432	-0.0136639949609824	-0.438979836388093	0.660758141212803	1034	-0.0781555593603388	-1.91992262642188	0.0550926231015891	603	-0.026617189551212	-0.855272759156278	0.392542782915615	1034	-0.0785252243634889	-1.92904103714219	0.0539490230724958	603
cg03434385	`ZNF629;ZNF629	NM_001080417;NM_001080417	1stExon;5'UTR	chr16:30797744-30798777	Island					-0.0631321623484979	-1.32603499845493	0.185223866378296	442	-0.114054310503409	-2.37541660831899	0.0177184906631101	432	-0.0451171154384819	-0.947027521940828	0.343980813639904	442	-0.102948996234963	-2.14238602328981	0.0324160795214154	432	-0.0439456161625822	-0.922405115699656	0.356667984885752	442	-0.104551974387016	-2.17598778811929	0.0298003760477796	432	-0.0528136385818526	-1.69820539543129	0.0896212454963075	1034	-0.0741620576982267	-1.82144943516049	0.0687809755149582	603	-0.0363594088332305	-1.1685522927459	0.242750096761662	1034	-0.0468216753154807	-1.14868738177656	0.25096865604641	603
cg03442269	`GALNT14	NM_024572	Body							-0.0474011879914006	-0.99504139839313	0.320081746098104	442	-0.0952741550547475	-1.9816574554912	0.0478157376729079	432	-0.0599894771612582	-1.25986264689033	0.208113772647948	442	-0.123494113662594	-2.57396710582343	0.0101939085956224	432	-0.0608169134162331	-1.27728265490966	0.201897817970912	442	-0.128062689796282	-2.67022613274711	0.00769877786061349	432	-0.0328036781109393	-1.05418842111799	0.29195684288894	1034	-0.0721576935680598	-1.77204740982047	0.076637156373314	603	-0.0436820220012916	-1.4041678950887	0.160436677419365	1034	-0.0867889655913837	-2.13302398771259	0.0331060634500617	603
cg03443331	`KIAA1310;KIAA1310	NM_001115016;NM_017991	Body;5'UTR	chr2:97303912-97304387	N_Shore	rs564691699;rs530853962;rs550553466;rs560756356	37;29;27;23	0.001997;0.000200;0.000399;0.000200		-0.0525158550039177	-1.10259623673109	0.270584935410389	442	-0.0505352792688313	-1.04881529022523	0.294646673075415	432	-0.0452580655615517	-0.949990166147825	0.342473933604592	442	-0.0806161513686556	-1.67532770433899	0.0942397097630339	432	-0.046153316206194	-0.968808414876977	0.333001335220153	442	-0.0865033233431734	-1.79826544533309	0.0724791725978707	432	-0.0341916203707378	-1.09882582317035	0.272006898760276	1034	-0.0716874276479675	-1.76045875241827	0.0785823352155751	603	-0.0347355268266958	-1.11631946408826	0.264449178233424	1034	-0.0682978541779818	-1.67695316449561	0.0938159652351332	603
cg03443360	`PTPRA;PTPRA;PTPRA	NM_080841;NM_002836;NM_080840	TSS1500;5'UTR;5'UTR			rs150864569	42	0.000399		-0.111143448022848	-2.34103609639608	0.0194243195678098	442	-0.0988578434379522	-2.05667730546007	0.0399948957828982	432	-0.0926741044766185	-1.94954246411263	0.0515304124169734	442	-0.0811587209723755	-1.68665276474023	0.0920377767373644	432	-0.0923735922871584	-1.94318443828395	0.0522952510355764	442	-0.0885064059731457	-1.84012277102745	0.0660846190475699	432	-0.0359040782978875	-1.15390578872281	0.24870426503058	1034	-0.163313269548111	-4.03984899969149	5.59932012633942e-05	603	-0.0301250191478772	-0.968051825968616	0.333172166910704	1034	-0.138504986274796	-3.41745748750905	0.000648365893078544	603
cg03462322	`MPG	NM_001015054	TSS1500	chr16:127448-128631	N_Shore	rs537431288;rs558950180;rs570861248;rs78071212	1;22;48;50	0.000998;0.000399;0.000200;0.000399		-0.0349943806550969	-0.734348181862197	0.463036407652312	442	-0.0867980181281978	-1.80442259648228	0.0715078909143662	432	-0.0343163327880619	-0.720108227168842	0.471753717973015	442	-0.124595885704084	-2.59717098143231	0.00953415267789614	432	-0.0339987540974082	-0.713438858893673	0.475867457724722	442	-0.128522116998369	-2.67991244459406	0.00748088521116279	432	-0.0334275239543422	-1.07425131961463	0.282871499748535	1034	-0.140915664549007	-3.47773253041713	0.000519519216763501	603	-0.0258291447587307	-0.829939590061427	0.406712701896689	1034	-0.118589342084915	-2.92099827862796	0.00354162484914238	603
cg03466342	`KRT85	NM_002283	3'UTR			rs577044837;rs539432886;rs556242695	0;8;12	0.001198;0.000200;0.000599		-0.0354962153641946	-0.744887848449799	0.456642641127095	442	-0.178738501667531	-3.74664475954633	0.000188192664360848	432	-0.0273911701604851	-0.574705790648222	0.565735416869377	442	-0.191249762877853	-4.01528129709934	6.32031961512334e-05	432	-0.0264776038939279	-0.555528749436063	0.578771020912541	442	-0.195295458445972	-4.10243014779046	4.37369198488124e-05	432	-0.00850436730254416	-0.273207318036723	0.78474598700241	1034	-0.0745672995665343	-1.83143930686284	0.0672757159923717	603	-0.023048349171013	-0.740553764439251	0.459092736964141	1034	-0.0844054147168949	-2.07415919585813	0.0382596306531296	603
cg03474702	`IMPA2	NM_014214	3'UTR			rs146317573;rs111527595	35;51	0.001797;0.500000		-0.0694174414900976	-1.45845821868104	0.145104362941311	442	-0.0862064996124071	-1.79206413315719	0.0734683239085247	432	-0.0702352363566418	-1.47569647838736	0.140414026731409	442	-0.0655167462310404	-1.36053306985236	0.17406571366946	432	-0.0697989256966528	-1.46649926025841	0.142901747675798	442	-0.067309906506298	-1.39788157710067	0.162551680630905	432	-0.0745077308629634	-2.39798671855093	0.0165617846569294	1034	-0.135482395183276	-3.34194044534938	0.000851764654826251	603	-0.0806029745808045	-2.59498044967391	0.00951583740792164	1034	-0.123474717681772	-3.04254550489242	0.00238635253038053	603
cg03482883	`MAPK8IP3;MAPK8IP3	NM_001040439;NM_015133	Body;Body	chr16:1796810-1797229	N_Shelf	rs527606467;rs115168799;rs138078140	31;20;2	0.000200;0.002596;0.000200		-0.00968701811179069	-0.203202962394536	0.83906785178957	442	-0.112571267197195	-2.34426356327066	0.0192623562142929	432	0.00400150679269415	0.0839367626057891	0.933144706945363	442	-0.118407738706497	-2.46692765165002	0.0137934893859034	432	0.00476401236261214	0.0999315223876414	0.920443905188921	442	-0.120078490656334	-2.50207283670963	0.0125038480332973	432	0.000609295139123951	0.0195734605910618	0.984387417732471	1034	-0.0578465093474307	-1.4197095767767	0.155979790821264	603	0.00163160705415597	0.0524150263337689	0.958208126512307	1034	-0.0609871895291944	-1.49697714475744	0.134682270037947	603
cg03485674	`ADCY7	NM_001114	Body			rs183883756;rs148103395;rs75816088;rs199903134	0;21;22;30	0.000599;0.000399;0.000799;0.001000		-0.0804153651374698	-1.69045708870663	0.0912991142125995	442	-0.135405730832085	-2.82518455124867	0.0048144169760114	432	-0.0691005583362893	-1.45177918345633	0.146953610600368	442	-0.157481829931211	-3.29301800577286	0.0010226121532865	432	-0.0679616003458283	-1.42777546276439	0.153748756319362	442	-0.159101323211735	-3.32746361846949	0.000905220701012857	432	-0.047862138283437	-1.53873524147765	0.124031834366534	1034	-0.128620309033857	-3.17072809036691	0.00155077802815112	603	-0.0202389290154662	-0.650259467565687	0.51564069398822	1034	-0.0861017769261219	-2.11605051037629	0.0345272279773071	603
cg03492469	`MPG;MPG;MPG	NM_001015054;NM_002434;NM_001015052	TSS200;TSS1500;TSS1500	chr16:127448-128631	N_Shore	rs55848255;rs143534888	1;8	0.020367;0.000200		-0.0788328052154771	-1.65704921885143	0.0978741139011001	442	-0.0861446361588578	-1.79077170743157	0.0736758602357206	432	-0.0581003551749177	-1.22009744429748	0.222821016630315	442	-0.101809768400787	-2.11851225562576	0.0343920615245215	432	-0.057131459059288	-1.19970601505968	0.230645342440152	442	-0.10494838151875	-2.18429905770705	0.0291821474703827	432	-0.040581623190798	-1.30439114403837	0.192268996809447	1034	-0.101700016110033	-2.50185593769929	0.0124667029455583	603	-0.0160204077313201	-0.514695738169092	0.606860477268725	1034	-0.0673689840208903	-1.65407636633397	0.0983792850750802	603
cg03502889	`ABTB2	NM_145804	Body			rs79182613;rs191156938;rs2064988	0;43;46	0.028355;0.000799;0.026957		0.178329326777549	3.78109450338953	0.000164037924013272	442	0.116297269444547	2.42255290040343	0.0155888797947993	432	0.111603502677976	2.35080748929181	0.0189241660382247	442	0.0550875426205424	1.14347721392293	0.253236535964233	432	0.114579270740513	2.41403645290762	0.0159520057506748	442	0.0528161256521784	1.09623858640615	0.27336483115979	432	0.102718495851451	3.3114862462491	0.000940452831039471	1034	0.101516019382266	2.49729814696412	0.012627452161856	603	0.0897933901750372	2.89238122213439	0.00385571338658117	1034	0.0873052944186868	2.14577858899979	0.0320713869010027	603
cg03509898	`ZFYVE21	NM_024071	Body	chr14:104193901-104194627	N_Shelf	rs531272476;rs551305905;rs150102213	44;43;27	0.001398;0.000200;0.000399		-0.0999534734060364	-2.10366620617385	0.0356660725693142	442	-0.169535764292936	-3.54984342014429	0.000401375569114159	432	-0.0670014102376557	-1.40754220629025	0.159660087469383	442	-0.1490317935927	-3.11357854095324	0.00189665284126091	432	-0.0679571493298249	-1.42768166425883	0.153775770743387	442	-0.148884632602571	-3.11045769874475	0.00191664277729331	432	-0.0707050576421095	-2.27517921206754	0.0229853152723157	1034	-0.122825639026582	-3.02638810284507	0.00251689894671233	603	-0.0608628717578129	-1.95762454872785	0.0504009424376055	1034	-0.122858589235229	-3.02720826351574	0.00251011790697049	603
cg03516335	`CLPB	NM_030813	Body			rs530595673;rs368092194;rs567357199;rs144913601	39;35;30;3	0.000599;0.002796;0.000200;0.000799		-0.0359839963086913	-0.755132714397543	0.450475610573162	442	-0.0760209724744888	-1.57945179041321	0.11461798752698	432	-0.0212671611185085	-0.446171009793307	0.655668922500768	442	-0.079948987565133	-1.66140335423645	0.0970047573279363	432	-0.0191403944099759	-0.401541340603288	0.68819851993785	442	-0.0844653506062418	-1.75569403438066	0.0794943256145602	432	-0.0579354974432077	-1.86325031530592	0.0625640120587265	1034	-0.142019941788541	-3.50535707664101	0.000468832818774487	603	-0.0338921530822638	-1.08919434784805	0.276230508611875	1034	-0.10886197015459	-2.67940212978928	0.00745889517222275	603
cg03522910	`B4GALT3	NM_003779	TSS1500	chr1:161147061-161147451	S_Shore	rs140581485;rs539491680	25;25	0.001198;0.000200		-0.105542061143174	-2.22214452089995	0.0264995372732663	442	-0.0490032025446974	-1.01696657625195	0.309547485048028	432	-0.100373357032422	-2.1125630186987	0.0348942481648273	442	-0.0413396954015928	-0.857727002154999	0.391386103050522	432	-0.0999681853639797	-2.10397792151906	0.0356387859191815	442	-0.041565287147252	-0.862413024212696	0.388804380467824	432	-0.0732205606854826	-2.35640984399182	0.0185334597368062	1034	-0.0691857981088656	-1.69882473175187	0.0896135626826979	603	-0.0738727428746215	-2.37747498262738	0.0175102000303306	1034	-0.0560500291417733	-1.37552501595164	0.169257771763233	603
cg03528016	`ALMS1P	NR_003683	TSS200			rs541959574;rs186763320;rs530836388;rs546198166	0;3;22;24	0.000399;0.000200;0.000200;0.000200		-0.0365775478491254	-0.767599566963027	0.443035129585491	442	-0.0915500178610984	-1.90375222289986	0.0572610743830269	432	-0.0465510784222415	-0.977169910513749	0.328847245511961	442	-0.118830861593108	-2.47582693238486	0.0134562749468038	432	-0.0464535471865795	-0.975119644424549	0.329862716556334	442	-0.121301235216027	-2.52780299758725	0.0116286430112725	432	-0.0556040393431977	-1.78811059557255	0.0739025250079856	1034	-0.0726340815567721	-1.78378773813968	0.0747067647593072	603	-0.0563819640180793	-1.81317983533611	0.0699460511453944	1034	-0.0699624417912599	-1.71795699748843	0.086063099750759	603
cg03561416	`ARID1B;ARID1B;ARID1B	NM_017519;NM_175863;NM_020732	Body;Body;Body			rs544354418	21	0.0002		-0.178840905325348	-3.79217897904484	0.00015696479595105	442	-0.161155400429061	-3.37117879200792	0.000774230645909509	432	-0.158706168778579	-3.35742913654782	0.000812786214087366	442	-0.157215007555648	-3.28734459388375	0.00104324943090049	432	-0.157320003536516	-3.32760810839717	0.000904094995928222	442	-0.162051913102531	-3.39026779949173	0.000722753213004514	432	-0.0491691548491086	-1.58082189906858	0.114079313587467	1034	-0.0875901886506471	-2.15281667801994	0.0315124118894021	603	-0.0479428971688962	-1.54133556787668	0.123397891741812	1034	-0.0869695175798926	-2.13748393784697	0.0327410587476153	603
cg03573179	`BRPF3	NM_015695	5'UTR	chr6:36164132-36165205	S_Shore	rs73413691	20	0.025959		-0.0593657592045623	-1.24673266687505	0.212889909664924	442	-0.10800937226203	-2.24850107162888	0.0247681664398027	432	-0.0483731739307443	-1.01547681120929	0.310247897845489	442	-0.0677678270720462	-1.40742073307245	0.159705237956677	432	-0.0451150861596012	-0.946984868608657	0.344002539162864	442	-0.0697111349193086	-1.447909348678	0.148042380196124	432	0.00428576584332741	0.137680028418078	0.890519828013187	1034	-0.0945870885712996	-2.32578364850911	0.0201750198775769	603	0.0134686078663962	0.432701918054466	0.665312240628538	1034	-0.0821465045581098	-2.01839458705673	0.0437563167076345	603
cg03581459	`PACS2;PACS2	NM_015197;NM_001100913	TSS1500;TSS1500	chr14:105780339-105782027	N_Shore	rs114638134	31	0.01258		-0.101442041446134	-2.13521053961931	0.0329936640948959	442	-0.0931232587276032	-1.93665618789064	0.053097484234193	432	-0.0869284580719885	-1.82804059937599	0.0678730782906255	442	-0.101961835941024	-2.12169867255338	0.0341225093326036	432	-0.0850983525148032	-1.7893658425493	0.0738942857019778	442	-0.104797150218445	-2.18112818450591	0.029416694849066	432	-0.0621965475560376	-2.00063138568506	0.0455541667265144	1034	-0.149241544502311	-3.68623378753801	0.000235257751152021	603	-0.0339853235497719	-1.0921908779778	0.274911697685259	1034	-0.107260306705945	-2.63967293263511	0.00838814360731408	603
cg03583857	`CD34;CD34	NM_001773;NM_001025109	TSS1500;TSS1500	chr1:208084098-208084513	S_Shore	rs139612154	28	0.00639		-0.0993076823071045	-2.08998416592672	0.0368814617314903	442	-0.149678776033835	-3.12730075639786	0.00181101231446691	432	-0.101237944031079	-2.13088493301843	0.0333496583252999	442	-0.143748458104961	-3.00162143267136	0.00274745152586713	432	-0.101605306416872	-2.13867088047369	0.0327112299636259	442	-0.144715088399047	-3.02209174674437	0.00256964154419897	432	-0.0557994014975809	-1.79440609020768	0.0728921397576692	1034	-0.0932297988103587	-2.29221322496096	0.022044827446334	603	-0.0412308167140401	-1.32528128469847	0.185246624829482	1034	-0.0805807935624036	-1.9797549057079	0.0479447163259694	603
cg03588970	`			chr6:108169396-108169790	S_Shore					-0.0619242584462201	-1.30059833763079	0.193791691940035	442	-0.116055358402797	-2.41746789424505	0.0158072259475555	432	-0.0552610357236902	-1.16034737726035	0.246296058729961	442	-0.117407883588462	-2.44590190759175	0.014620043155954	432	-0.0533680771494036	-1.12052284599265	0.262875565998398	442	-0.122379184680139	-2.55049266470359	0.0109024646124167	432	-0.0751082537132702	-2.41738693787122	0.0157066041296786	1034	-0.0870200730779382	-2.13873277241436	0.0326394736156141	603	-0.0476888718791045	-1.53315636658559	0.125400504637907	1034	-0.0496858287199919	-1.21906688751734	0.223106556730118	603
cg03606269	`					rs570237509	24	0.0002		-0.0354996357550677	-0.744959685696345	0.456599233023083	442	-0.0589169320410051	-1.22314407964998	0.22167767429737	432	-0.0241029803087401	-0.505686322250281	0.61329573982877	442	-0.0628390435517876	-1.30477736469612	0.192373619774546	432	-0.0231347888677643	-0.485366029949241	0.627627611182249	442	-0.0680793505958283	-1.41391056398122	0.157790380517321	432	-0.056314515928579	-1.81100618023809	0.0702820681162086	1034	-0.147589881985853	-3.64483077964114	0.000276217796832447	603	-0.0300904594933456	-0.966940598169999	0.333727314207533	1034	-0.111870184367011	-2.75405883556311	0.00595902412309696	603
cg03609435	`					rs557548739;rs185977715	21;28	0.000200;0.004393		-0.0209278754307758	-0.439050923910051	0.66081694978538	442	-0.0523612350976814	-1.08677961549613	0.277523397481458	432	-0.0129644530267927	-0.271959898345154	0.785774563702378	442	-0.0415416701320032	-0.861922444280784	0.389074173713163	432	-0.012622050147598	-0.264776419187619	0.791300278129864	442	-0.046304630080485	-0.960880386374208	0.336979602219504	432	-0.0516252174806872	-1.65992326166449	0.0970851112089706	1034	-0.10001885806903	-2.46021826705386	0.0140049370016538	603	-0.0562487668857063	-1.80888729639912	0.0706108924929434	1034	-0.0949941473340659	-2.33585329529431	0.019641862099591	603
cg03609639	`NKX2-3	NM_145285	TSS1500	chr10:101292436-101292851	N_Shore	rs545968269;rs558163548	36;39	0.000200;0.000399		-0.0686478548252535	-1.44223793392207	0.149626557191653	442	-0.0945057187273302	-1.96557803915938	0.0496498269193947	432	-0.0707661059695129	-1.48688771791687	0.137432082590425	442	-0.098160338807189	-2.0420718086347	0.0414260697692752	432	-0.0694460477145295	-1.45906117461719	0.144938302603306	442	-0.103260757783174	-2.14892031191673	0.0318925284706074	432	-0.0535750712109797	-1.72273564643116	0.0850865511851328	1034	-0.106666898622551	-2.62495698592837	0.008757820232469	603	-0.0459888484821821	-1.47842343767938	0.139460073511346	1034	-0.107671332092793	-2.64986707516053	0.00814031286820245	603
cg03613618	`PGCP	NM_016134	5'UTR	chr8:97657174-97657943	S_Shore	rs114247735	29	0.004792		-0.0437261906537684	-0.917793545847807	0.359076602411067	442	-0.0856840925348749	-1.78115065574996	0.0752359266177647	432	-0.0490049057491977	-1.02875961859592	0.303964222330901	442	-0.0645174621220962	-1.33972350508267	0.180740083765486	432	-0.0469210120294083	-0.984946689903856	0.325013967495694	442	-0.0683603359760584	-1.41976444452865	0.156078146078473	432	-0.0792346806377049	-2.55074177920074	0.0108098491406339	1034	-0.0709567066342471	-1.74245331502091	0.0816841837045565	603	-0.0788882727679284	-2.53954351332084	0.0111612811505268	1034	-0.0635748418730694	-1.56066128382453	0.118881378706788	603
cg03619840	`					rs544786957	0	0.000399		-0.00487288207265086	-0.10221524571582	0.918632071344803	442	-0.0794076015382425	-1.6501052065912	0.0992957111848585	432	-0.0170894994072064	-0.358507267300809	0.720122625635716	442	-0.110934298474812	-2.30988936072797	0.0211012627324262	432	-0.0157256950864643	-0.329892158633572	0.741628178822478	442	-0.113335802988906	-2.36032219983273	0.0184524243995166	432	-0.0108331744057934	-0.34802670820965	0.727885989652273	1034	-0.0483956853665828	-1.18736238078405	0.235370922502968	603	-0.0309946030124667	-0.996013111013151	0.319399756808054	1034	-0.0643118031959096	-1.57880228756934	0.114657307082094	603
cg03620376	`CDC42EP5;CDC42EP5	NM_145057;NM_145057	5'UTR;1stExon	chr19:54982388-54982897	S_Shore	rs534657825;rs190592559;rs374091775;rs537024309;rs557054841;rs377685687	1;10;12;15;24;44	0.000200;0.004792;0.000799;0.000399;0.000399;0.010383		-0.0747014447927369	-1.56987521147496	0.11682221995258	442	-0.0427236906624378	-0.886476934784882	0.375710813024183	432	-0.0649642385598455	-1.36462325993095	0.17276661018821	442	-0.042606105627127	-0.884034193086379	0.377027381235454	432	-0.0643198639392383	-1.35105002633765	0.177074850692427	442	-0.0450598559951722	-0.935014218928382	0.350142665173708	432	-0.0486500289858287	-1.56410511756025	0.117954405042777	1034	-0.124469750853668	-3.06731980417211	0.00219819378298489	603	-0.0269313876855818	-0.865373538766335	0.386977520298667	1034	-0.0894066391782934	-2.19769904009286	0.0281408574241087	603
cg03621504	`MED13L	NM_015335	Body							-0.0388585300052702	-0.815514038758881	0.415101938031467	442	-0.0977698523583905	-2.03389604507136	0.0422459929737764	432	-0.0355062825064612	-0.745099285089273	0.456514885860212	442	-0.105545465875957	-2.19681914681407	0.0282717181608894	432	-0.0334991037474179	-0.702946153424426	0.482379139720804	442	-0.111086825886811	-2.31309169999956	0.020923706758328	432	-0.031403867404399	-1.00917344042175	0.313048464365075	1034	-0.133420872649342	-3.29047115685487	0.00102277105108454	603	-0.0109183921400195	-0.350764631047886	0.725831293033658	1034	-0.107392184733925	-2.64294363723117	0.00830790304145758	603
cg03627290	`PNKD;TMBIM1	NM_015488;NM_022152	Body;5'UTR	chr2:219156977-219157380	N_Shore	rs545998922	3	0.0002		-0.0959266187472556	-2.01837998354052	0.043833323129812	442	-0.0743328171459557	-1.54424648279439	0.12291888261957	432	-0.111350017140095	-2.34542342361094	0.0191983393179699	442	-0.0899049572517415	-1.86935638347578	0.061900517460998	432	-0.107820138316806	-2.27047999178059	0.0233913321206279	442	-0.0962588936443584	-2.0022664409175	0.0455486541566138	432	-0.0377562418574806	-1.21348692924457	0.225111154452139	1034	-0.0421355055118399	-1.03357657567645	0.301606793335669	603	-0.0450271488482055	-1.44746495407261	0.147933422025607	1034	-0.0387023928898643	-0.949274979059837	0.342741816632877	603
cg03641640	`RASA3	NM_007368	Body	chr13:114773745-114774499	S_Shore	rs565651121	3	0.0002		-0.0164176418258091	-0.344410306483382	0.730690658639391	442	0.0389189788126196	0.807448963936936	0.419736898940903	432	0.0052046706420171	0.10917507823018	0.913113007953766	442	0.0673258185983912	1.39821303935087	0.162452135362323	432	0.00623173518808805	0.130719672257318	0.896056144261509	442	0.0683668455828417	1.41990006443852	0.156038645779764	432	0.0603948315995343	1.94253339926975	0.0522010816123793	1034	0.129367189679187	3.1893479179027	0.00145484014147691	603	0.0819428802614393	2.63831081000654	0.00838423236350704	1034	0.139924797358101	3.45295251197933	0.000569291273665829	603
cg03646329	`LPAR6;LPAR6;LPAR6;RB1;LPAR6	NM_001162498;NM_005767;NM_001162497;NM_000321;NM_001162498	5'UTR;5'UTR;5'UTR;Body;1stExon			rs569568978	1	0.0002		0.0330480051945449	0.693473342562416	0.488299283904647	442	0.0696300644781714	1.44622003631947	0.148515597536516	432	0.0119474437938527	0.250623620524034	0.80221749694537	442	0.0614360971068527	1.2755724808301	0.202511181900946	432	0.0156938375455948	0.329223744256116	0.742133021458263	442	0.0626853221766652	1.30157712436996	0.193465909703384	432	0.0479241289858266	1.54073125607993	0.123544992801442	1034	0.0878703951992657	2.15973930677769	0.030970786416901	603	0.0472292837728174	1.5183588808511	0.12908784328713	1034	0.0886366180422447	2.17867094411769	0.0295302429615085	603
cg03655142	`JTB	NM_006694	TSS1500	chr1:153949712-153950525	S_Shore	rs191543854;rs561521466	9;25	0.000399;0.000200		0.09317244775938	1.96008684919973	0.0502826448502057	442	0.039709630151182	0.823869639946226	0.410347319812409	432	0.0366034931510668	0.768144529840322	0.442711496565932	442	0.0153033219605332	0.31736121434326	0.751114180618539	432	0.041106619856882	0.862745894477476	0.38861356378075	442	0.0141284534510976	0.292993342552335	0.769661132390945	432	0.0919221625249225	2.9613367805622	0.00309112675758217	1034	0.18245709880397	4.52364258485101	6.51235094633165e-06	603	0.0496475144927382	1.59622669251189	0.110597792493243	1034	0.124273217322341	3.0624260271659	0.00223424647816323	603
cg03655330	`HYAL1;HYAL1;HYAL1;NAT6;HYAL1;HYAL1;HYAL1;HYAL3	NM_007312;NM_153281;NM_153285;NM_012191;NM_153282;NM_153283;NM_033159;NM_003549	3'UTR;3'UTR;3'UTR;TSS1500;3'UTR;3'UTR;3'UTR;TSS1500	chr3:50336331-50336879	S_Shore	rs150976767;rs587729250;rs182987423	41;18;16	0.000200;0.000200;0.001797		-0.00981341325131931	-0.205854501285199	0.836997197372943	442	-0.0865477894193712	-1.79919446880848	0.0723319315193946	432	-0.0313821874515339	-0.658494545243243	0.510495399383038	442	-0.122338642471841	-2.54963918554159	0.0109290322187719	432	-0.02772395592727	-0.581691669058631	0.561022089375233	442	-0.128812403888127	-2.68603329398202	0.00734606817603395	432	-0.000468584251889983	-0.0150531562379655	0.987992681730824	1034	-0.0525486243291397	-1.28943309798063	0.19753718027381	603	-0.0111945249108008	-0.359636413745985	0.719187009470104	1034	-0.073952259719487	-1.81627781089019	0.069571044466736	603
cg03681335	`SULT1C2;SULT1C2	NM_001056;NM_176825	TSS1500;TSS1500			rs543856360;rs73952181	0;6	0.000200;0.023562		-0.0328879432777231	-0.690112202282083	0.490409257117291	442	-0.118832608040107	-2.47586366619813	0.013454898267519	432	-0.02201704371216	-0.461908051443306	0.644348802731022	442	-0.127651158445543	-2.66155061479504	0.00789874873515317	432	-0.0218973790278911	-0.459396733092186	0.646149828416271	442	-0.132900388305039	-2.77228051696532	0.00566509260653802	432	-0.0227652433055226	-0.73145428260637	0.464629195375123	1034	-0.0909670194378882	-2.23626593058609	0.0254969314545517	603	-0.0181684816210519	-0.583722286997036	0.559513116557494	1034	-0.0890629604480627	-2.18920602375851	0.0287538724081721	603
cg03695871	`DKFZp761E198	NM_138368	1stExon	chr11:65547499-65549261	N_Shore	rs559089372;rs565910416;rs142051081;rs554924731;rs574628865	49;48;41;33;15	0.000399;0.000200;0.012380;0.000200;0.000399		-0.107863419584484	-2.27139855000444	0.0233354700952633	442	-0.121536061251599	-2.53274531599674	0.0114669028470691	432	-0.069701606859885	-1.46444790305765	0.143461202932832	442	-0.131408682942985	-2.74079801366186	0.00623357287708344	432	-0.0686018713055092	-1.44126881151658	0.149900117565561	442	-0.135252488729512	-2.82194757346153	0.00486293913070975	432	-0.03809544459357	-1.22439943096599	0.220969294917093	1034	-0.139416959088548	-3.44025500100976	0.000596484046028779	603	-0.0239867143870609	-0.770715202536631	0.441008350122939	1034	-0.114556412541707	-2.82076759383687	0.00485509128797566	603
cg03707403	`VTN	NM_000638	TSS200	chr17:26698359-26699557	N_Shore	rs2227721;rs142337639;rs542954584	0;1;48	0.081769;0.000998;0.000399		-0.0550401797374346	-1.15570052918564	0.248191895878921	442	-0.110047105671219	-2.29126476520667	0.0221601890105433	432	-0.06451403355989	-1.35513993392299	0.175768334023141	442	-0.123977227477928	-2.58414093389144	0.00989978373518153	432	-0.0646099269218342	-1.35715982948255	0.175125741799611	442	-0.128541703508485	-2.68032542168052	0.00747171962742678	432	-0.0369476193029558	-1.18747383229821	0.235207464886503	1034	-0.0448757543987362	-1.10088203706073	0.271227812848551	603	-0.0311357550050711	-1.00055196465574	0.317199801516958	1034	-0.0549714961052613	-1.34900272397122	0.177625638805879	603
cg03714916	`CDKN1A;CDKN1A	NM_078467;NM_000389	TSS1500;TSS1500	chr6:36646244-36648465	N_Shore					-0.123137403571046	-2.59612698509193	0.00955992282736992	442	-0.112207588534611	-2.33662568495393	0.0196583774816081	432	-0.109478964364842	-2.30569149104164	0.0213312684479329	442	-0.11844732039194	-2.46776011024721	0.013761631869027	432	-0.106778692544628	-2.24837999801016	0.0247708160178656	442	-0.121990302096092	-2.54230641019021	0.0111596749950446	432	-0.039049323654532	-1.25508822583822	0.209615030843443	1034	-0.0938397268755167	-2.30729776667314	0.0211867531286997	603	-0.0128636167718474	-0.413263356070566	0.679491180100657	1034	-0.073882736808265	-1.81456407225128	0.0698344916378884	603
cg03720617	`PHKB;PHKB	NM_001031835;NM_000293	Body;Body			rs557965840;rs576421847;rs140163847;rs562066889	1;14;23;50	0.000998;0.000599;0.007788;0.001398		-0.0143070585487475	-0.300127870979342	0.76421355687867	442	-0.0629003235672866	-1.30605313675701	0.191939447318938	432	-0.0206345921639853	-0.43289630422918	0.665279911027167	442	-0.0741116005456803	-1.53963382688968	0.124040460445641	432	-0.0175523514200983	-0.368219046878966	0.71287290087803	442	-0.0801268946419769	-1.66511629930531	0.0962611798795412	432	-0.0701941104072386	-2.25868328437662	0.0239951309137216	1034	-0.104381417047209	-2.56829675928278	0.0103209295850108	603	-0.0742063777691205	-2.38825200064432	0.0170061172537345	1034	-0.102523237994164	-2.52225011717421	0.0117694209924215	603
cg03721291	`RECQL5;RECQL5;RECQL5	NM_001003715;NM_004259;NM_001003716	Body;Body;Body							-0.0911304299878394	-1.91688625292401	0.0555604556880413	442	-0.125970102263083	-2.62612175372055	0.00876459933975372	432	-0.0715121371440494	-1.50261619889578	0.133324113454995	442	-0.137639663167064	-2.87238818157464	0.00415496148918209	432	-0.0717856541531256	-1.50838314510624	0.131841966198461	442	-0.142282918206039	-2.97059678220284	0.00303846759154364	432	-0.100661270414929	-3.24470781025489	0.00119039722500317	1034	-0.154285276535776	-3.81279772935998	0.000142623140620802	603	-0.0662749054699499	-2.13219067090182	0.0330979887884222	1034	-0.117775564729402	-2.90076568991675	0.00377725648345729	603
cg03726147	`DMAP1;DMAP1;DMAP1	NM_019100;NM_001034023;NM_001034024	Body;Body;Body			rs140100133;rs201151814	40;39	0.001997;0.003000		-0.112511904573882	-2.37010460208282	0.0179694584417766	442	-0.10932320247138	-2.27607079210858	0.0230580419153348	432	-0.101969224672098	-2.14638441145916	0.0320891005481291	442	-0.117919882789084	-2.45666800356832	0.0141915045868898	432	-0.10139091617029	-2.13412698206883	0.0330825329782545	442	-0.122343118442299	-2.54973341154857	0.010926096269731	432	-0.0420113784579036	-1.35040015599498	0.177056278187623	1034	-0.00459939029656099	-0.112756234221049	0.910261153333046	603	-0.0361071187042533	-1.16043687934843	0.246036708388733	1034	-0.00584689219545724	-0.143339957527626	0.886069100823498	603
cg03735916	`			chr2:200715388-200716067	N_Shore	rs567955761	41	0.0002		-0.0826053739452238	-1.73670237088313	0.0827892650939492	442	-0.0823824376167595	-1.71219911023392	0.0872226518318197	432	-0.079988100760582	-1.68143669333487	0.0930383641417547	442	-0.0633946401410162	-1.3163445416632	0.188463418437783	432	-0.0775512626331759	-1.63000198443257	0.103470205099899	442	-0.067106173954093	-1.39363771979838	0.163830276746758	432	-0.0481220971223631	-1.54710563505937	0.122000227702809	1034	-0.099126258933212	-2.43811679943611	0.0148877011864061	603	-0.0238483695657129	-0.766268364979865	0.443648663446749	1034	-0.0602224969617179	-1.47816136574007	0.139648959579299	603
cg03736807	`CBX5;CBX5;CBX5	NM_001127321;NM_001127322;NM_012117	TSS1500;TSS1500;5'UTR			rs73321061	21	0.000998		-0.0638419355297175	-1.3409835787741	0.180321398255775	442	-0.040498044412864	-0.840244883494525	0.401109298818225	432	-0.0682186852043676	-1.4331932385401	0.152194532255616	442	-0.0607328195374871	-1.26093438686373	0.207736561740493	432	-0.0670223211257414	-1.40798281537402	0.159529552150053	442	-0.0660860379746632	-1.37238949124114	0.17034629041667	432	-0.034406443217097	-1.10573508310955	0.269004422308672	1034	-0.11750499556244	-2.89403952016357	0.00385869369929226	603	-0.0178581491058964	-0.573749694435633	0.566241572008264	1034	-0.0917379899619813	-2.25532556426961	0.0242716797751115	603
cg03747309	`TRAP1	NM_016292	Body			rs566809754;rs567628108;rs2074803;rs574864767	30;40;44;48	0.000200;0.006589;0.006589;0.001997		-0.12613205396367	-2.65993452695615	0.00793375271618018	442	-0.0842948018355489	-1.75213209881897	0.0801055185228362	432	-0.114703331570498	-2.41667343166587	0.0158375160884771	442	-0.096716266568726	-2.01183985499225	0.0445267840458139	432	-0.110714239038895	-2.33192076661556	0.0199012776755612	442	-0.0959212136178954	-1.99519890208788	0.0463156797534393	432	-0.00471270205475888	-0.151395528235689	0.879692863436588	1034	-0.144761324948563	-3.57397377679792	0.000362204916495551	603	0.00558519086080721	0.179424763827593	0.857638676727607	1034	-0.12659724747828	-3.12031111837343	0.00184057366011979	603
cg03759346	`					rs2914117;rs138183742	44;2	0.441693;0.000799		-0.016285111033639	-0.341629573652031	0.732781415146127	442	-0.0894839428383938	-1.86055523659304	0.0631364508766395	432	-0.0143290460637379	-0.300589179556099	0.763861919116695	442	-0.103112582598066	-2.14581461803362	0.0321404560343925	432	-0.0110195313526527	-0.231156996480188	0.817296655673762	442	-0.105609480428836	-2.19816154400442	0.028175572576267	432	-0.0135903603536682	-0.436613903180642	0.66247296214507	1034	-0.0950054112112635	-2.33613194746225	0.0196272850971796	603	-0.0133388602652316	-0.428533058937134	0.668343248759622	1034	-0.0881149554492482	-2.16578155844178	0.0305045973064929	603
cg03761810	`RRM2;RRM2	NM_001034;NM_001165931	Body;Body	chr2:10262173-10263481	S_Shore					0.0346432233011493	0.726973302059699	0.467539842556866	442	-0.0565239812407403	-1.17335689812471	0.241051575602941	432	0.0332979926572848	0.698722900711957	0.485013675165145	442	-0.0469899037783017	-0.975121513011021	0.329870201963052	432	0.0325603188325366	0.683232526650846	0.494743268620818	442	-0.0435706986923731	-0.904073627601576	0.366310892777868	432	-0.0548147551478441	-1.76267750938872	0.0781016023912866	1034	-0.0601605176818096	-1.47663640003801	0.140057596163307	603	-0.0376683705950886	-1.21066006589189	0.22619308547814	1034	-0.0331183579633034	-0.812203560962967	0.416911242941902	603
cg03767807	`MAPK8IP3;MAPK8IP3	NM_001040439;NM_015133	Body;Body			rs532933453;rs546662525;rs182130319;rs529156896	45;25;18;1	0.000200;0.000200;0.000799;0.000998		-0.0672469300868676	-1.41271558357098	0.158132509434369	442	-0.0746664811375137	-1.55120410281986	0.121242143109927	432	-0.0889454509411045	-1.87067913349875	0.0617090760659337	442	-0.0857977186978937	-1.78352430792911	0.0748485485037606	432	-0.0875332188404612	-1.84082343608376	0.065974073708279	442	-0.0845204113530907	-1.75684400804483	0.0792978140006554	432	-0.0398816704948243	-1.2818688787674	0.200057261470614	1034	-0.064633266531015	-1.58671595296416	0.112852066908956	603	-0.0490864791390629	-1.57815953626234	0.114689669906386	1034	-0.0685273745502859	-1.68260638429696	0.0927148837236394	603
cg03779937	`ITGA6;ITGA6	NM_001079818;NM_000210	Body;Body			rs77167534;rs189667182	37;51	0.087460;0.000200		-0.0472966840425475	-0.992844379522221	0.321151004525193	442	-0.089817131595807	-1.86752036605689	0.0621566788059219	432	-0.0318177830610905	-0.66764080906366	0.504641012858888	442	-0.0639625981120231	-1.32816992065928	0.184526929246825	432	-0.0307800192519516	-0.645851144175779	0.518646407468658	442	-0.0683403972480311	-1.41934904561497	0.156199181334288	432	-0.0339735511132142	-1.09181225415646	0.27507809703743	1034	-0.13501284649792	-3.33021483366206	0.000888208191852468	603	-0.0249369918882032	-0.801260916478788	0.423116986261119	1034	-0.112299597077259	-2.7647199535962	0.0057686332377104	603
cg03782584	`SPOPL	NM_001001664	TSS1500	chr2:139259033-139259912	N_Shore	rs529795746;rs549701582;rs569568483;rs182759055	43;21;20;8	0.000399;0.000399;0.000200;0.007388		-0.054689228953418	-1.14831669702054	0.251225360357121	442	0.0129733349898088	0.269035894429896	0.788025295216011	432	-0.0508430968349888	-1.06741419398909	0.286162466633149	442	0.018757244707761	0.389004130769774	0.697448782529528	432	-0.0522941131442451	-1.09793213127256	0.272615925564388	442	0.0189027857615206	0.392023204772377	0.695218047506739	432	-0.0938794897929021	-3.02476286686056	0.00251275620225954	1034	-0.0904047202608145	-2.22236669009713	0.0264238869734929	603	-0.0672752196210969	-2.16446945061993	0.0305313685269794	1034	-0.0523406329148111	-1.28432006267062	0.199319544918276	603
cg03789791	`			chr16:29169898-29170414	N_Shelf	rs539508360	15	0.0002		-0.136550790120884	-2.8823181777806	0.00402532713639698	442	-0.129217405946861	-2.69457375012012	0.00716160387663219	432	-0.128104350968228	-2.70198529236587	0.00700234843422432	442	-0.0983451533128381	-2.04594156085195	0.0410427124876709	432	-0.126780508985114	-2.67375768349275	0.00761599353898502	442	-0.0973567845271774	-2.02524817243675	0.0431281799101338	432	-0.108428258814662	-3.4969789728734	0.000478181971528115	1034	-0.200573159054883	-4.98468803684743	6.84841932963605e-07	603	-0.104587948129592	-3.3721942102824	0.000756359893531051	1034	-0.199584957361198	-4.95945172130707	7.78653067921829e-07	603
cg03819286	`MGRN1;MGRN1;MGRN1;MGRN1	NM_001142291;NM_001142290;NM_001142289;NM_015246	TSS1500;TSS1500;TSS1500;TSS1500	chr16:4674706-4675453	N_Shore					0.00369950626956436	0.0776018522175107	0.938179903890159	442	-0.0745205227986406	-1.54816051115633	0.121973410923329	432	0.0144229373346792	0.302559066586983	0.762360899523404	442	-0.111325805207617	-2.31810933298264	0.0206481217986875	432	0.0161763746805528	0.33934809964039	0.73449827718084	442	-0.110839103342873	-2.30789077816352	0.0212127403970923	432	-0.025209454555932	-0.810019219525187	0.41806655569084	1034	-0.0791377883951594	-1.94415213596479	0.052097530448667	603	-0.025504722218636	-0.819510724318162	0.412633634812255	1034	-0.0623667966241625	-1.53092778387322	0.126067622373736	603
cg03840289	`MXD4	NM_006454	Body	chr4:2262960-2264669	N_Shore	rs542148123;rs561832426;rs148658795;rs189928481;rs564258447	34;26;15;2;1	0.000200;0.000200;0.000998;0.000200;0.000799		-0.0513056574147589	-1.07714232346261	0.281795701175915	442	-0.115595212155719	-2.40779634982629	0.0162299564660113	432	-0.0562364089432533	-1.18087076521539	0.238044479284087	442	-0.13593976078426	-2.83646609271482	0.00464871598440799	432	-0.0535487409387543	-1.12432334268454	0.261260855050556	442	-0.142532504080223	-2.97587943708476	0.00298700730515682	432	-0.0196644267822993	-0.63179637293674	0.527633262018399	1034	-0.0974444239870265	-2.39648392480632	0.0166846356813547	603	-0.0194679568569416	-0.625482407131569	0.531766860116149	1034	-0.0929898187914808	-2.28627859253313	0.0223906186518987	603
cg03841312	`MIRLET7A3;LOC400931;MIRLET7B	NR_029478;NR_027033;NR_029479	TSS200;Body;TSS1500			rs577262889;rs150510406;rs556676499;rs116680112;rs542480209;rs562022735	0;1;25;37;44;51	0.000200;0.001398;0.000200;0.015375;0.000200;0.000200		-0.0337990266656454	-0.709244521067132	0.478464622974972	442	-0.093275341729117	-1.93983748120096	0.0527087095580343	432	-0.033209252229247	-0.696859405128639	0.486178630915964	442	-0.117551840014072	-2.44892882766605	0.01449841889349	432	-0.0321886683578356	-0.675428541016289	0.499684274949664	442	-0.117225969091178	-2.44207700514489	0.0147750183483456	432	-0.0275381575928038	-0.884880343912766	0.37636695905037	1034	-0.112460860406446	-2.76872394032908	0.0056985583188935	603	-0.025844819408279	-0.830443470731595	0.40642791669073	1034	-0.119003227604378	-2.93129005023137	0.00342697382864106	603
cg03848580	`TMC6;TMC6	NM_001127198;NM_007267	Body;Body			rs202217062;rs540761329;rs188155233;rs201061167	13;17;26;27	0.000200;0.000200;0.001398;0.000200		-0.0959723589374369	-2.01934835296801	0.0437323871468246	442	-0.110647879904085	-2.30387624986633	0.021438217103553	432	-0.0796193154445814	-1.67365140556295	0.09456078407336	442	-0.120855106987823	-2.51841424721975	0.0119414852072126	432	-0.0773114424147641	-1.62494113013627	0.10454504555518	442	-0.126346176384764	-2.63404631919105	0.00856387592227634	432	-0.0699586344984953	-2.25108134722078	0.0244733037551377	1034	-0.0620454284911406	-1.52301874235006	0.128035060224644	603	-0.0554345189947867	-1.78264795760992	0.0747884979594746	1034	-0.0371514699716164	-0.911198858003699	0.362445495116248	603
cg03854765	`SLC23A2;SLC23A2	NM_203327;NM_005116	5'UTR;5'UTR							-0.0318182109453043	-0.667649793534391	0.504635279505599	442	-0.0722986114098645	-1.50183631703997	0.133534515855669	432	-0.027719098270152	-0.581589695618435	0.5610907531377	442	-0.0856096426049305	-1.77959542089531	0.0754906271689393	432	-0.0251734374587184	-0.528154061857312	0.597619975810085	442	-0.0904423484658414	-1.88059131964797	0.060352004470026	432	-0.0599683808812277	-1.92878397542493	0.0538877076828829	1034	-0.135154245031937	-3.33374569088375	0.000877084754724189	603	-0.0425577932212244	-1.36798503935262	0.171485191427708	1034	-0.108036077526874	-2.65891415898972	0.00792588399405875	603
cg03873392	`					rs2719744	40	0.320288		-0.0978608095446752	-2.05933644050715	0.0397326032836782	442	-0.0725523765178441	-1.50712625044076	0.13217287034557	432	-0.0753531785129186	-1.58362348418764	0.113655599409155	442	-0.0713043401215508	-1.48111182290472	0.138973953217293	432	-0.0769637252994555	-1.61760369506025	0.106119136293327	442	-0.0695258325066727	-1.44404812171729	0.149125701715621	432	-0.0166853477056444	-0.536062487748297	0.592013695392999	1034	-0.0769688056976908	-1.89065291581974	0.0589009995948578	603	-0.0255182104019745	-0.819944311121134	0.41238645445474	1034	-0.0939166532113008	-2.3092004071658	0.0210806181961604	603
cg03875330	`TMEM205;TMEM205;CCDC159;TMEM205	NM_001145416;NM_033408;NM_001080503;NM_198536	Body;Body;TSS1500;Body	chr19:11456744-11457251	N_Shore					-0.0798298621149186	-1.67809612044835	0.0936891864170711	442	-0.0943458007474606	-1.96223207598358	0.0500388166555246	432	-0.0838132591942929	-1.76221583871028	0.0783770808147254	442	-0.103248567797026	-2.14866481095387	0.0319128629636155	432	-0.0826151240946074	-1.7369082970757	0.082752862788968	442	-0.109595835821855	-2.28179279515795	0.0227162669298864	432	-0.0186931587074657	-0.600583138737609	0.548226239934608	1034	-0.0920364736619427	-2.26270529115487	0.0238111758918262	603	-0.0149664796603773	-0.480830422798276	0.630726187805704	1034	-0.0820628968756562	-2.01633100856753	0.0439719126908034	603
cg03875496	`									-0.0884185030194286	-1.85953816228664	0.0632730883882269	442	-0.0486261809715711	-1.00912981640585	0.313289122903527	432	-0.0756144432599954	-1.58913522461474	0.11240525286242	442	-0.0889381641029164	-1.84914693330046	0.0647688237182915	432	-0.0752924422676869	-1.58234220056351	0.11394782566639	442	-0.0926114706769962	-1.92595120122792	0.0544233596131601	432	-0.0404045764373119	-1.29869421892634	0.19421761180292	1034	-0.174334269836589	-4.31796191382918	1.66918152467937e-05	603	-0.005377436913315	-0.172750518238024	0.862880751806971	1034	-0.133467678278607	-3.29163941456387	0.0010185599339202	603
cg03887528	`SP140;SP140;SP140;SP140	NM_007237;NM_007237;NM_001005176;NM_001005176	5'UTR;1stExon;1stExon;5'UTR			rs182651769	1	0.001997		0.131396829924411	2.77223159302917	0.0056636885905855	442	0.0632130748379888	1.31256437483583	0.189734767368045	432	0.127996999867078	2.69969593818422	0.00705040747318291	442	0.0433924688591466	0.900370774314952	0.368276609110304	432	0.129389614646172	2.72939962891177	0.0064493130071654	442	0.047497923686289	0.985679603793859	0.324662670934104	432	0.137127090273727	4.43310159004872	9.64305700195087e-06	1034	0.166839318766018	4.12871281647043	3.83325335987624e-05	603	0.0878501710619046	2.82945935019732	0.00469938229882352	1034	0.116208799051959	2.86182293262637	0.00427133332317046	603
cg03914735	`ACPL2;ACPL2	NM_001037172;NM_152282	5'UTR;5'UTR	chr3:140949911-140950963	S_Shelf	rs180996985;rs564380758	48;1	0.000200;0.000200		-0.000792482890891025	-0.0166232648397646	0.986744698018472	442	-0.0859619309699206	-1.7869547870501	0.0742915803644779	432	0.00335718530891292	0.0704211777046529	0.943890325196278	442	-0.106263006335156	-2.21186715721885	0.0272099804641834	432	0.00224766136102155	0.0471474218586684	0.962417092125567	442	-0.107246568741024	-2.23249786268683	0.0258104442500531	432	-0.0194271280036156	-0.624170293897234	0.532627924216478	1034	-0.107161364532023	-2.63721913102736	0.00844879775532833	603	-0.0158753883720179	-0.510035841333851	0.610120405744183	1034	-0.107703126633222	-2.65065567290509	0.00812141732757185	603
cg03918071	`FAM19A3;FAM19A3	NM_182759;NM_001004440	Body;Body	chr1:113265573-113265787	S_Shore	rs77724279	4	0.016573		-0.0758002905597252	-1.59305606317306	0.111522432666963	442	-0.0799902067090904	-1.66226359394823	0.0968320724004892	432	-0.0675974651304769	-1.4201020457854	0.155970698979631	442	-0.103996122045186	-2.16433468321008	0.0306861503278951	432	-0.0670547367157204	-1.40866584015147	0.15932735826659	442	-0.106057850329934	-2.20756446017963	0.0275099893834057	432	-0.0379490475851879	-1.21968965378236	0.222750145388187	1034	-0.112627128411017	-2.77285234152666	0.00562711143953614	603	-0.0197157289707288	-0.63344508246745	0.526556597718588	1034	-0.0945196633574015	-2.32411578782847	0.0202645375702309	603
cg03924164	`			chr16:88513273-88513514	S_Shore	rs549650196;rs567673744;rs534981569;rs547136552	34;27;7;1	0.000200;0.000200;0.000200;0.000599		-0.0585074162271745	-1.22866515366807	0.219590917373444	442	-0.0900747287678507	-1.87290558259624	0.061407812440398	432	-0.0524771398314714	-1.10178189619597	0.270938790695049	442	-0.11151683974042	-2.32212050694733	0.0204300990066031	432	-0.0506375577707736	-1.06309164142895	0.28811738511072	442	-0.114609141655911	-2.38707421756769	0.0171693183053072	432	-0.025221099326995	-0.810393542962335	0.417851498450764	1034	-0.13075128083412	-3.22386317508588	0.00129133591879979	603	-0.00946892438500201	-0.304195984780508	0.76103644665558	1034	-0.0968480237664214	-2.38172369519642	0.0173660184824052	603
cg03928384	`CCR2;CCR2	NM_001123041;NM_001123396	TSS200;TSS200			rs570856692	16	0.001398		-0.0655883735272069	-1.37777124942183	0.168668633093395	442	-0.140058044467607	-2.92352265213805	0.00353406630860584	432	-0.0110360561687829	-0.231503666106898	0.817027509027467	442	-0.0821214578806128	-1.70675045698357	0.0882321951731323	432	-0.0110283575612289	-0.231342159095521	0.817152896820823	442	-0.0805113757265053	-1.67314083646859	0.0946697346479097	432	-0.0717169678613014	-2.30785226996487	0.0210937454977429	1034	-0.0896761980760736	-2.20436076926073	0.0276679427190939	603	-0.0396164933378532	-1.27333664620027	0.203067140883464	1034	-0.05814678849736	-1.4270958552505	0.153839482159548	603
cg03934069	`GPSM2	NM_013296	5'UTR	chr1:109419544-109420038	S_Shore	rs548933070	25	0.000998		-0.0651111926608788	-1.36771888938218	0.17179511660328	442	-0.0624825387691593	-1.29735558340446	0.194913750877573	432	-0.040494776616008	-0.849890361412296	0.395719100974316	442	-0.0714264355782719	-1.48365660882775	0.138296979499162	432	-0.0388669825932807	-0.815691609928982	0.415000394078158	442	-0.0733538067608929	-1.52383398371036	0.127942900884382	432	-0.074813719480431	-2.40787162925741	0.0161210670474661	1034	-0.115647532851501	-2.84787588306537	0.00446208415563042	603	-0.040143561071286	-1.29029554106085	0.197116742209837	1034	-0.0691965901466888	-1.69909057451253	0.0895634325186623	603
cg03957124	`			chr6:37012609-37012884	S_Shelf	rs539280201	30	0.0002		0.0687892795115142	1.44521855840166	0.148787587027479	442	0.139291498068998	2.90731093171138	0.00372110173177025	432	0.0449197638699483	0.942879433737629	0.346097750857571	442	0.144162763256581	3.01039445248724	0.00266991238415734	432	0.0443658489219712	0.931237212750655	0.352083519813117	442	0.145517522753878	3.03908932836211	0.0024300714959914	432	0.0653484592103812	2.10229934329538	0.0356373731541451	1034	0.110863409150749	2.7290674786444	0.00642772704105119	603	0.0555179486520257	1.78533638901105	0.0743513885858677	1034	0.0929119093663329	2.28435197377468	0.0225038865147181	603
cg03966751	`									-0.019344198172415	-0.405817947886971	0.685055053241905	442	-0.0719225383309098	-1.49399713636933	0.135572297533188	432	-0.0345997053489489	-0.726059366307868	0.46809962067165	442	-0.10138234533232	-2.10955658380726	0.0351594325594287	432	-0.033539029098668	-0.703784576649497	0.481857045334543	442	-0.106322640909937	-2.21311789714707	0.0271233036601302	432	-0.0206118668581453	-0.662245005534614	0.507932027427231	1034	-0.0702611732734785	-1.72531666752837	0.0847279918915001	603	-0.0327639174411567	-1.05290974497831	0.292542458478653	1034	-0.0781077539706298	-1.91874346462812	0.0552419758414295	603
cg03970900	`									-0.12190853175988	-2.56995708975575	0.0103087513829321	442	-0.0590247811209235	-1.22538829015392	0.220831472770959	432	-0.118207074533169	-2.49117907621443	0.0128880254249351	442	-0.0393833701651967	-0.81709357155309	0.414206737974383	432	-0.120273616107675	-2.53515245953071	0.0113854584987131	442	-0.0364624828468124	-0.756437487154925	0.449700719579901	432	-0.0271904090642608	-0.87370063547942	0.382425917938457	1034	-0.0845567232316473	-2.07789523399535	0.0379133665548137	603	-0.0187375438424626	-0.602009500009064	0.547276602576718	1034	-0.069884462614983	-1.71603592178782	0.0864143850259893	603
cg03978682	`ARL15	NM_019087	Body							-0.0674168480128206	-1.41629604438107	0.157081788592191	442	-0.049566439531739	-1.02867454589745	0.304012835145422	432	-0.0714520085162925	-1.50134845237139	0.133651657940454	442	-0.0476154599841892	-0.988122413097635	0.323465486005512	432	-0.0710543212218022	-1.49296392483378	0.135833662728744	442	-0.0511522627607056	-1.06164249209067	0.288783551138185	432	-0.0233494418818655	-0.750231503075544	0.453245245479577	1034	-0.115154440110033	-2.83562440801305	0.0046359834653975	603	-0.0207104880905327	-0.665414541668847	0.505903658253697	1034	-0.0905081832226845	-2.22492404097796	0.026251178644729	603
cg03979241	`EPB49;EPB49;EPB49;EPB49;EPB49;EPB49;EPB49;EPB49	NM_001978;NM_001114136;NM_001114138;NM_001114135;NM_001978;NM_001114138;NM_001114137;NM_001114139	1stExon;5'UTR;1stExon;5'UTR;5'UTR;5'UTR;5'UTR;5'UTR	chr8:21914275-21914525	S_Shelf					-0.0629921500754033	-1.32308634994234	0.186202438825342	442	-0.0949229337303416	-1.97430790766806	0.0486468619991503	432	-0.0482434133604177	-1.01274856363193	0.311549099103953	442	-0.114590886885279	-2.38669064101354	0.017187147385528	432	-0.0458322240451439	-0.962058851239198	0.336379226342148	442	-0.118263110681921	-2.46388598784695	0.0139104464316943	432	-0.0426979145778965	-1.37249459833944	0.170077892171716	1034	-0.100557544438799	-2.47355849843061	0.0134947782928831	603	-0.0311512044857261	-1.00104875731192	0.31695961411658	1034	-0.0874359357928462	-2.14900593803033	0.0318140190938306	603
cg03985718	`TGFBRAP1;TGFBRAP1	NM_001142621;NM_004257	Body;Body			rs138510292;rs144303951;rs200328199	40;16;1	0.000220;0.000200;0.001000		-0.0871773899436295	-1.83330211124553	0.0670860525620038	442	-0.100856778393819	-2.09854560647713	0.0361229250899804	432	-0.0816759351416279	-1.71707386134679	0.0863191499365643	442	-0.124565787074613	-2.59653700338416	0.00955165954137108	432	-0.0817284812343231	-1.71818348449902	0.0861164072324863	442	-0.12679767063726	-2.64356113510135	0.00832831518342041	432	-0.0182218816374895	-0.585438317656132	0.558359245357083	1034	-0.128057856043892	-3.15670846937429	0.00162682504702613	603	-0.0244053247940246	-0.784170837820972	0.433074153641625	1034	-0.117337959165198	-2.88988732285963	0.00390976014032369	603
cg03992611	`SLCO3A1;SLCO3A1	NM_001145044;NM_013272	Body;Body	chr15:92396013-92397682	S_Shore	rs7172169;rs145023318	10;1	0.335863;0.002796		-0.103749984102814	-2.18413737689258	0.0291885631959726	442	-0.105484764648908	-2.1955462476328	0.0283631474306373	432	-0.0954561327688126	-2.00841978224377	0.0448829822575068	442	-0.106168795840797	-2.20989127528652	0.0273473975712494	432	-0.094214027860244	-1.98212871257662	0.0477560779743047	442	-0.11143005051575	-2.32029816222363	0.0205289000437016	432	0.0143218783969982	0.460118321504912	0.645516930716981	1034	-0.1070991075522	-2.63567516245209	0.00848716317154033	603	0.0291754766376659	0.937521160803309	0.348641505424015	1034	-0.0892246482581067	-2.1932016004757	0.028464057915695	603
cg03997145	`					rs571522285	5	0.0002		-0.0749998067259694	-1.57616896572268	0.115364083443769	442	-0.113281926423029	-2.3591904613074	0.0185085112467637	432	-0.0820147509598591	-1.72422885082138	0.085018594838645	442	-0.124952678322039	-2.60468659851188	0.00932878630408817	432	-0.0825702300594143	-1.73596012383728	0.0829205825689334	442	-0.129708566598366	-2.70493229040931	0.00694346374158848	432	0.00162846389710103	0.0523140529094775	0.958288561780038	1034	-0.0553099841525299	-1.35732616797354	0.174967014840175	603	0.00300545647162253	0.0965498489540062	0.9231025154851	1034	-0.0683535979405677	-1.67832614928265	0.0935475876982933	603
cg04008438	`			chr22:45064159-45065092	N_Shore	rs150720398	2	0.0002		0.0473498324361389	0.993961731932188	0.320606913134025	442	-0.12021608408742	-2.50496782505867	0.0124025424081699	432	0.0225243901924936	0.472555522209401	0.636736121755287	442	-0.12765470348111	-2.66162534394898	0.00789700652364515	432	0.0237419939719625	0.498109872994978	0.618622506882745	442	-0.131385110604963	-2.7403006196779	0.00624295293423436	432	-0.0351457849782379	-1.12951501740502	0.258845041766811	1034	-0.0579538921645047	-1.42235095393966	0.155211821280701	603	-0.0407368277238278	-1.30938530814294	0.190572620793838	1034	-0.0742850108616085	-1.82448036682169	0.0683213797129093	603
cg04018738	`VARS	NM_006295	Body	chr6:31763240-31763905	N_Shelf	rs150385182;rs200039031;rs192709471;rs144131888;rs35196751;rs140959510	0;14;33;37;38;40	0.002796;0.000200;0.000599;0.004193;0.024960;0.000399		-0.19177075492629	-4.07304677064462	4.94825675621381e-05	442	-0.158835035583172	-3.32179860064235	0.000923625944828346	432	-0.164811409416563	-3.48893517148571	0.000503347444251028	442	-0.149707977460688	-3.12792016995866	0.00180723180372071	432	-0.165425757464984	-3.50218303707954	0.000479206353820701	442	-0.149018889342439	-3.11330487499983	0.00189839805541366	432	-0.0626034771004919	-2.01375499874251	0.0441558093050471	1034	-0.171336509136253	-4.24220791426576	2.3375634770067e-05	603	-0.0591211937176591	-1.90147145338909	0.0573732462612237	1034	-0.16136525782416	-3.99080025567494	6.88031716409811e-05	603
cg04022561	`									-0.100179321488542	-2.10845155257252	0.0352491370929504	442	-0.155326507843292	-3.2472035508923	0.00120065424764087	432	-0.0767763761201184	-1.61365046585877	0.106974984048463	442	-0.140657127207389	-2.93619514800766	0.00339387124522716	432	-0.0750166603729545	-1.57652449107354	0.115282144843003	442	-0.141865870833361	-2.96177054490032	0.00312625639578462	432	-0.0546842242861119	-1.75847163004233	0.0788143806669239	1034	-0.116500919298439	-2.86908263367533	0.00417500074766127	603	-0.0256083676478868	-0.822842484626037	0.410736512361716	1034	-0.0844324434941959	-2.07482657056159	0.0381975802426967	603
cg04034685	`ICAM2;ICAM2;ICAM2;ICAM2;ICAM2	NM_000873;NM_001099789;NM_001099786;NM_001099787;NM_001099788	TSS1500;5'UTR;5'UTR;5'UTR;5'UTR							0.00128466212103903	0.0269473148133302	0.978513966870997	442	-0.0810527605463794	-1.68444097310099	0.0924645330661717	432	-0.0109609416433493	-0.229927859907627	0.818251103770425	442	-0.0949071140016753	-1.97397688061538	0.0486845802723833	432	-0.0110745259519568	-0.232310713723524	0.816401018792991	442	-0.0996495583537942	-2.07325799760668	0.0384212862082617	432	-0.022926779670703	-0.736646308992321	0.461465633823995	1034	-0.0742575820425736	-1.82380421123079	0.0684236890943437	603	-0.0256118983053211	-0.822955980577086	0.410671978568689	1034	-0.0874974793800655	-2.15052632925625	0.0316933895537762	603
cg04036920	`C11orf41	NM_012194	TSS1500			rs190683139;rs182512198	0;38	0.000399;0.000200		-0.0538234341903196	-1.13010201223504	0.258818859292418	442	-0.122502625159793	-2.55309133972581	0.0108219250215109	432	-0.0415889056219731	-0.872879731418216	0.383067562057209	442	-0.1204109325312	-2.50906763453692	0.0122603211985286	432	-0.0404197172242929	-0.848313321046116	0.396596144881992	442	-0.124562649763515	-2.5964709213719	0.00955348600079882	432	-0.0395612329745616	-1.27155863382809	0.203698495665273	1034	-0.126860532462807	-3.12687098194564	0.00180023680704105	603	-0.036421575660281	-1.17055203514181	0.24194499795747	1034	-0.118650485151122	-2.92251861144413	0.00352447124540932	603
cg04051565	`MYO3B;MYO3B;MYO3B	NM_001083615;NM_001171642;NM_138995	Body;Body;Body							-0.0876579222069049	-1.84345946215555	0.0655879711923046	442	-0.061407687615726	-1.27498113815517	0.202720398386956	432	-0.0692952493086407	-1.45588270485501	0.145815329247697	442	-0.0830526850887341	-1.72619340989361	0.0846724685552303	432	-0.0662739184711166	-1.39221414410735	0.164251703931	442	-0.0839295836661614	-1.74450481158435	0.0814271447503467	432	-0.0466069922883276	-1.49832381416944	0.134213930722449	1034	-0.166043425659244	-4.10864533182336	4.17838498311779e-05	603	-0.0311917886646762	-1.00235378223453	0.316329234389498	1034	-0.13216523028019	-3.25913613986408	0.00114192064708596	603
cg04053045	`DUSP2	NM_004418	Body	chr2:96810443-96811454	Island	rs559291993;rs201468327;rs551527506;rs151080230	46;41;28;6	0.000200;0.000200;0.000200;0.001198		0.0485886253694782	1.02000680602196	0.308095322056774	442	0.0992691374460017	2.0652906069445	0.0391707394692969	432	0.0217577533452145	0.456466523982377	0.648253894307959	442	0.0509631702601942	1.05771113792213	0.29057208818328	432	0.0237259443470192	0.497773023474191	0.618859804605269	442	0.0503644414608442	1.04526368251947	0.29628408122617	432	0.101411147917856	3.26904589470632	0.00109293773586222	1034	0.133046300469821	3.28112245633558	0.00105705494543469	603	0.101456554337484	3.27051972891867	0.00108727982397244	1034	0.131746261448007	3.24868297875104	0.00118444187069853	603
cg04068111	`			chr13:44715873-44716242	S_Shore	rs150794413;rs563811195;rs76869625;rs546373849;rs567941477;rs529170586	22;36;37;38;44;45	0.000998;0.000200;0.001597;0.000200;0.000399;0.000399		-0.0901254055779518	-1.89563009546342	0.0583223636122618	442	-0.119070323829267	-2.48086379481986	0.0132686665064797	432	-0.0970299483649167	-2.04174106968119	0.0414525662068975	442	-0.137292352692624	-2.86504748171487	0.00425180730948951	432	-0.0951929258916507	-2.00284807941789	0.0454793597037648	442	-0.139913068225587	-2.92045627214458	0.00356877274237771	432	-0.0501666751713605	-1.61294624713397	0.106914711025778	1034	-0.0717159343016251	-1.7611612130653	0.0784632919194653	603	-0.0406905456523347	-1.30789603923284	0.191077325536064	1034	-0.0536739414009548	-1.31709862721291	0.188095340029545	603
cg04076766	`ANKRD53;ANKRD53	NM_024933;NM_001115116	3'UTR;Body			rs3796100;rs61732224;rs538081467;rs556018051	30;29;20;19	0.136981;0.072684;0.000200;0.000200		0.0298247850185985	0.625795564578176	0.531712665303733	442	0.0746819188669888	1.55152602148626	0.121164998610096	432	0.0366090238782259	0.768260699020759	0.442642525550322	442	0.0653098753091108	1.35622486872936	0.175432156264104	432	0.0392847319171112	0.824467794354924	0.410000076510501	442	0.0605636152314238	1.25741273833609	0.209008172538181	432	-0.00878590314814397	-0.282252264673734	0.777803895941515	1034	0.0795831626958088	1.95513982272849	0.0507849142021215	603	0.00396325230158524	0.127319182978078	0.898712317324968	1034	0.083035177345741	2.04033029863222	0.041519256984855	603
cg04086097	`IRF5;IRF5;IRF5;IRF5;IRF5;IRF5;IRF5;IRF5	NM_001098630;NM_032643;NM_001098631;NM_001098627;NM_002200;NM_001098629;NM_001098627;NM_001098628	5'UTR;5'UTR;5'UTR;5'UTR;5'UTR;5'UTR;1stExon;5'UTR	chr7:128577818-128578756	S_Shelf	rs115298500;rs562532915;rs577745764;rs544998582	50;47;37;18	0.000799;0.000200;0.000200;0.000200		-0.0504911478381128	-1.06001264854001	0.289515377140244	442	-0.0808890142404455	-1.68102304853713	0.0931271350970161	432	-0.0504211096838794	-1.05853976612714	0.290185742120964	442	-0.114975541128654	-2.3947734943758	0.016814866372845	432	-0.0492378150749156	-1.03365698274032	0.301668938728974	442	-0.119122335670435	-2.48195785337038	0.0132282233750409	432	-0.0418516591574665	-1.34526017491642	0.178709886874911	1034	-0.108456605691635	-2.66934576376825	0.00768493521692509	603	-0.0270634955027644	-0.869620565767984	0.384651972608259	1034	-0.0814291042786079	-2.00068886432405	0.0456355206754034	603
cg04097131	`JARID2	NM_004973	Body			rs571543726;rs116789322	0;27	0.000200;0.003794		-0.0315487458772617	-0.661991766777855	0.508252690511555	442	-0.0386346985132222	-0.801545124873015	0.423143458890118	432	-0.0337374607981323	-0.707951630258861	0.479266751199857	442	-0.05989627450948	-1.24352408294108	0.214078178016757	432	-0.030883096142586	-0.648015360547998	0.517246409836398	442	-0.0645530152381591	-1.34046383350653	0.180499415384428	432	-0.0539788226992345	-1.73574368370493	0.0827582604696966	1034	-0.0576410961975861	-1.41465696432824	0.157456851030299	603	-0.0441672462423082	-1.41978573879119	0.155837524644817	1034	-0.0560092535021864	-1.37452224082681	0.169568671207072	603
cg04102510	`ITPKB	NM_002221	Body			rs537858901	37	0.000399		0.112335837757259	2.36636411690329	0.0181511451987538	442	0.124277655732291	2.59046823548926	0.00972070208959796	432	0.0612731657756636	1.28688888288858	0.198528555633285	442	0.0923262720551957	1.91998619293436	0.0551740824699392	432	0.0629655258108678	1.32252565073755	0.186388950994289	442	0.0929574318915096	1.93318750272752	0.0535241105141233	432	0.095009596160891	3.06139400452379	0.00222565799739848	1034	0.150279297403563	3.71225829767664	0.000212508372929074	603	0.0798501591452861	2.57063977175219	0.0102096093316673	1034	0.131951617551052	3.25380641201509	0.00116342116311841	603
cg04106092	`									0.00554490912878511	0.116312187186664	0.907457722286431	442	-0.097967521581148	-2.03803464196987	0.0418292433950241	432	0.0016691780307993	0.035013006274721	0.972085234878801	442	-0.106905829893497	-2.22535020131495	0.0262881015976167	432	0.00403504071489347	0.084640187450052	0.932585762983359	442	-0.109908217949938	-2.28834946733597	0.0223300632208848	432	-0.0371303367217658	-1.19335164865192	0.232898560378047	1034	-0.108691538102438	-2.67517390670967	0.00755319696620698	603	-0.0574216742674782	-1.8466887731162	0.0649309017475725	1034	-0.129832030153473	-3.20093829508757	0.00139791764989183	603
cg04112626	`PAQR3	NM_001040202	TSS1500	chr4:79860213-79860745	S_Shore	rs112009915;rs573891326;rs549381007;rs553180097	4;35;47;51	0.500000;0.000200;0.000200;0.000599		-0.0885003044132252	-1.86126757557305	0.0630281778767957	442	-0.114686254185199	-2.38869455487666	0.0170941822767105	432	-0.0731278046234485	-1.53668491890084	0.1247527824512	442	-0.110729750632614	-2.30559501577167	0.0213414277930342	432	-0.0712163249464544	-1.49637942687866	0.134941504854455	442	-0.114538979508459	-2.38559995130041	0.0172379327807734	432	-0.0472348212732849	-1.51853716944504	0.129042919978969	1034	-0.128509593777287	-3.16796825531919	0.00156548418078619	603	-0.0233602668312285	-0.750579441724161	0.453035799892316	1034	-0.0883043245922689	-2.17046040589675	0.0301477577078681	603
cg04115307	`					rs554011577;rs577274629;rs138503112	10;20;39	0.000799;0.000200;0.003195		0.0357711200000788	0.75066162808116	0.453161213534686	442	0.178752894085653	3.74695305719819	0.000187964272755084	432	-0.00607313678574441	-0.12739275816476	0.89868712712084	442	0.140606051200989	2.93511464400496	0.00340562406075514	432	-0.00140565283913085	-0.0294852421222979	0.976490950103443	442	0.136738686193091	2.8533467476606	0.00441041866480015	432	0.047555325136988	1.52885645835788	0.126463418628907	1034	0.0206483925168695	0.506273523945307	0.612825062875628	603	0.0350054013180558	1.12499967123644	0.260753363662697	1034	0.00180341669419296	0.0442113516371554	0.964750599456039	603
cg04121983	`CASKIN2	NM_020753	5'UTR	chr17:73511016-73513176	Island	rs35643020	14	0.471046		-0.0831817964052219	-1.74887716800531	0.0806592971614547	442	-0.111070859804834	-2.31275648421391	0.0209422317492002	432	-0.0762592404100033	-1.60273904936985	0.109365663476159	442	-0.114137710995709	-2.37716884822072	0.0176349734822865	432	-0.0755750483258765	-1.58830412010385	0.112593091953552	442	-0.118787886802422	-2.47492302895786	0.0134901899719241	432	-0.0817689848643416	-2.63268677943111	0.00852396626222316	1034	-0.0827882882412711	-2.03423584234702	0.0421308429052923	603	-0.0584879162187714	-1.88105697428098	0.0600992793365254	1034	-0.0685446575805001	-1.68303208257459	0.0926323923433816	603
cg04132186	`			chr3:184321783-184322277	S_Shore					-0.08217420274432	-1.72759623416728	0.0844120230450643	442	-0.0917582106750723	-1.90810597458268	0.0566950194130565	432	-0.0757490921618235	-1.59197591451647	0.111765091673157	442	-0.10003689920795	-2.08137094390523	0.0376707153182921	432	-0.073960458806857	-1.55424580368586	0.12050592395633	442	-0.104507493036562	-2.17505521345953	0.0298704434830992	432	-0.0419851254621481	-1.34955529467949	0.17732729667837	1034	-0.0881755148866338	-2.16727781660017	0.0303900899720791	603	-0.0319157974284721	-1.02563556904111	0.305221616636212	1034	-0.0731776584001367	-1.79718489806245	0.0725527051412716	603
cg04132540	`LYN;LYN	NM_002350;NM_001111097	5'UTR;5'UTR			rs189050893	29	0.0002		-0.0408682906744561	-0.857738246641914	0.391372104917852	442	-0.12031395892838	-2.50702718690116	0.0123309219058402	432	-0.0391224459403391	-0.821058415031956	0.411938330879645	442	-0.112245351931751	-2.3374187519287	0.0196169286332831	432	-0.0355832366645863	-0.746715531142622	0.455538974674875	442	-0.115469421919501	-2.40515262021367	0.0163472278802958	432	-0.0446193801080688	-1.43433911081797	0.151642583123135	1034	-0.0574876992387465	-1.41088388896101	0.158566757137138	603	-0.0354409713962692	-1.13900963607777	0.254863971242846	1034	-0.0426259802621427	-1.04562234796637	0.296009488073869	603
cg04144521	`MFSD6	NM_017694	5'UTR	chr2:191272484-191273671	S_Shelf	rs564641378	11	0.000399		-0.0044713684827986	-0.0937928416381159	0.925316163963278	442	-0.085616690213524	-1.77974264229365	0.0754664865916952	432	0.000680537614102982	0.0142750796274241	0.988616990634147	442	-0.0891038692837459	-1.85261051707866	0.0642695866381178	432	0.00336453179210064	0.070575280576707	0.943767743728833	442	-0.0949674924490405	-1.97524030208191	0.0485407540406069	432	-0.0435285173617912	-1.39922720153472	0.161912782098136	1034	-0.124519145756247	-3.06854979861506	0.00218921666594847	603	-0.0263675985853521	-0.847249078639035	0.396998030857069	1034	-0.102209388529961	-2.51447452354268	0.0120310789933203	603
cg04155026	`TSNAXIP1;TSNAXIP1;RANBP10	NM_018430;NM_018430;NM_020850	5'UTR;1stExon;TSS1500	chr16:67840275-67841106	S_Shore					-0.110523555250061	-2.32787139945923	0.0201164230998729	442	-0.0751117137971114	-1.56048871551859	0.119032578081285	432	-0.100898675669772	-2.12369493535018	0.0339486698786551	442	-0.0654875584989474	-1.35992521212452	0.174258025685588	432	-0.100548037743002	-2.1162645089472	0.0345773641765269	442	-0.0702044654253165	-1.4581895804147	0.145187467241815	432	-0.0675063800761622	-2.17192930312508	0.0299631511644687	1034	-0.119451259384911	-2.94243206985986	0.00330667125506638	603	-0.0428872846753787	-1.3785892272107	0.168189724595461	1034	-0.0889600849478377	-2.18666385815911	0.0289395861325234	603
cg04179740	`CDH23;C10orf54	NM_022124;NM_022153	Body;Body			rs551804888;rs570105459	36;1	0.000200;0.000200		-0.0248588212512376	-0.521550483995578	0.602208370252635	442	-0.141013513122157	-2.94373487100956	0.00331288414091029	432	-0.00559355301190217	-0.117332581536209	0.906649561386295	442	-0.0981143774342843	-2.04110946504639	0.0415218743921317	432	-0.000351007185309049	-0.00736278913684755	0.994128734192494	442	-0.103317148691158	-2.15010226850469	0.0317986050338385	432	-0.0206137127185979	-0.66230432855834	0.507894024030109	1034	-0.118432628356326	-2.91710166699846	0.00358593718061554	603	0.013360213972083	0.429219163847571	0.667844036037202	1034	-0.0933748313665391	-2.29579996551844	0.0218381019210898	603
cg04181189	`PRDM10;PRDM10;PRDM10;PRDM10;PRDM10;PRDM10	NM_199438;NM_199439;NM_199437;NM_020228;NM_199439;NM_199438	5'UTR;5'UTR;Body;Body;1stExon;1stExon			rs573716785;rs542046879	1;30	0.000200;0.000200		-0.0646877350642184	-1.35879879686445	0.17460562589011	442	-0.136789981122803	-2.85443069666828	0.0043955025145369	432	-0.0535116614080677	-1.12354332074789	0.261591700531421	442	-0.12557134536674	-2.61772005421383	0.0089819949473813	432	-0.0529204277209316	-1.11110627687936	0.266906041979613	442	-0.128686795365797	-2.6833847161791	0.00740413526546467	432	-0.0439437049347796	-1.41259056361294	0.157943775353188	1034	-0.143711370570535	-3.54768695183624	0.000400044606021215	603	-0.0595378865991376	-1.9149048967119	0.0556361548388006	1034	-0.137110285077863	-3.3826040618227	0.000735858843282809	603
cg04196298	`SLC43A2	NM_152346	Body	chr17:1478584-1479214	S_Shore	rs193065319	25	0.003195		-0.0804277419620182	-1.69071839721437	0.0912491232038345	442	-0.0738963162777811	-1.53514501390666	0.125139585697247	432	-0.0806159399998478	-1.6946918354191	0.0904916746688036	442	-0.110931467188404	-2.30982991842016	0.0211045709395377	432	-0.0789416112865929	-1.65934584661081	0.0974103117938342	442	-0.113885987178666	-2.37188024707306	0.0178881021386544	432	-0.06050502244559	-1.94608623615955	0.051772512474621	1034	-0.122493731538692	-3.0181269990833	0.00258614252205666	603	-0.0443888571475191	-1.42691892018587	0.153770539211185	1034	-0.103434563019679	-2.5448309887561	0.0110379567804556	603
cg04202267	`LASS6	NM_203463	Body			rs193289174;rs566624930;rs535133451;rs554755453	0;8;18;23	0.000399;0.001597;0.000399;0.000200		-0.00933970573878913	-0.195917017116016	0.844763336677988	442	-0.0769874194207849	-1.59961044889307	0.110067576491813	432	-0.0421792904547606	-0.885285511693446	0.376344649648917	442	-0.11012852789559	-2.29297388577998	0.0220611227959464	432	-0.0409263850812915	-0.858958886833941	0.390698601664022	442	-0.113747320042902	-2.36896704585934	0.0180288936232946	432	-0.00851593043199226	-0.273578807662448	0.784460523009964	1034	-0.0958109585790315	-2.35606159912099	0.0186089378549684	603	-0.027683370790988	-0.889548841647356	0.373854457984183	1034	-0.111232200490772	-2.7382213921235	0.00625232803733094	603
cg04219001	`FLOT1	NM_005803	Body			rs41270529;rs530695676;rs368466336	0;13;27	0.094449;0.000200;0.000200		-0.0361223629844776	-0.758038895826264	0.448734834021235	442	-0.1007092585111	-2.09545517893224	0.0363973630796909	432	-0.0522142944287522	-1.09625325559741	0.273349543287787	442	-0.125587340912934	-2.61805705955134	0.00897318290111477	432	-0.053511353821865	-1.12353685023708	0.26159444620363	442	-0.1280962199274	-2.67093302444116	0.00768268587362829	432	-0.0470251812715336	-1.51178754282601	0.130752115636156	1034	-0.0267481591172662	-0.655895634260864	0.512091970767032	603	-0.0577730247853074	-1.85801339208413	0.0633046042451883	1034	-0.030774259493659	-0.754678546039392	0.450666010789457	603
[truncated: 2,577 more rows]
[truncated: 211 more columns]
