# Supplementary material for: Epigenome-wide association study of leukocyte telomere length
Source: Aging (Albany NY). 2019 Aug 26;11(16):5876–94. doi: 10.18632/aging.102230 (PMC6738430; doi:10.18632/aging.102230)
Supplement: Supplementary File 2 [file aging-11-102230-s002.pdf]

## SUPPLEMENTARY FILE 2

### Functional enrichment analysis

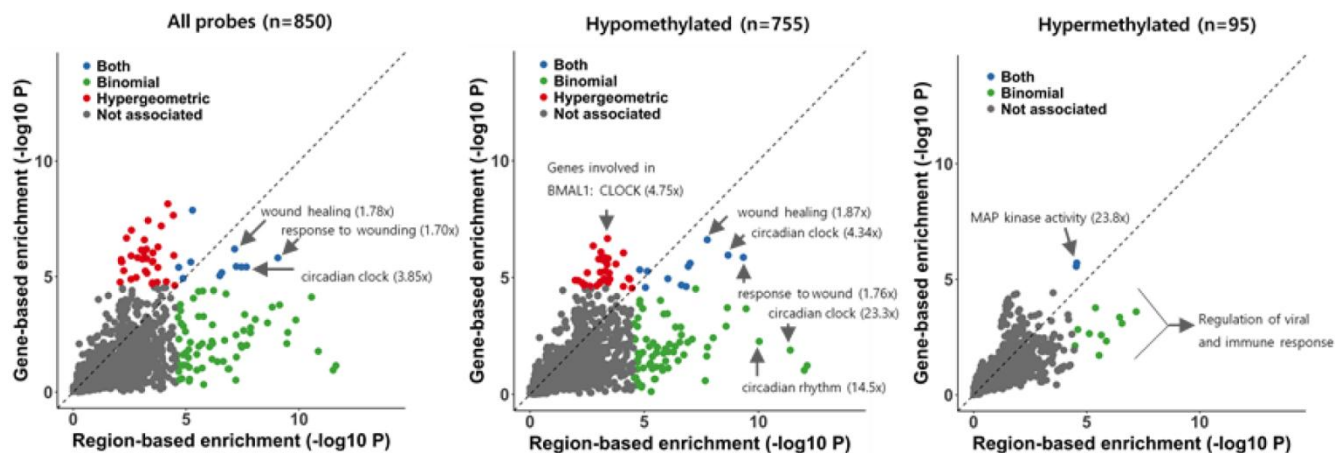

**Supplementary Figure 1. Functional enrichment analysis highlights specific biological pathways associated with LTL-associated probes.**

Differentially methylated probes (DMPs) were tested for enrichment of biological annotations using both a gene-based (hypergeometric) and a region-based (binomial) test. The x-axis shows the  $-\log_{10}$  p-value of the binomial test, while the y-axis shows the association strength of the hypergeometric test. Annotations significant after Bonferroni correction are color-coded

as follows:  $P < 0.05$  in both tests (blue),  $P < 0.05$  in the hypergeometric test only (red),  $P < 0.05$  in the binomial test only (green),  $P > 0.05$  in both tests (grey). The annotations significant in both test and having the largest region fold enrichment are labeled in the graph. Results are shown for all probes (left), hypomethylated probes (middle), and hypermethylated probes (right).

**Supplementary Table 1. Functional enrichment analysis highlights circadian rhythm annotations.**

| Ontology                 | ID                                                        | Description                                                        | Binomial<br>p-value | Region<br>Enrichment | Hypergeometric<br>p-value | Gene<br>Enrichment |
|--------------------------|-----------------------------------------------------------|--------------------------------------------------------------------|---------------------|----------------------|---------------------------|--------------------|
| MSigDB<br>Pathway        | REACTOME_CIRCADIAN_CLOCK                                  | Genes involved in Circadian Clock                                  | 2.12E-09            | 4.34                 | 1.1E-06                   | 4.60               |
| PANTHER<br>Pathway       | P00015                                                    | Circadian clock system                                             | 4.03E-12            | 23.26                | 1.3E-02                   | 5.69               |
| MSigDB<br>Pathway        | KEGG_CIRCADIAN_RHYTHM_MAMMAL                              | Circadian rhythm - mammal                                          | 9.21E-11            | 14.51                | 5.4E-03                   | 5.26               |
| GO Biological<br>Process | GO:0032922                                                | circadian regulation of gene expression                            | 2.72E-05            | 6.94                 | 2E-01                     | 2.44               |
| MSigDB<br>Pathway        | REACTOME_BMAL1_CLOCK_NPAS2_ACTIVATES_CIRCADIAN_EXPRESSION | Genes involved in BMAL1:CLOCK/NPAS2 Activates Circadian Expression | 3.46E-05            | 3.55                 | 2.8E-05                   | 4.75               |
| MSigDB<br>Pathway        | PID_CIRCADIANPATHWAY                                      | Circadian rhythm pathway                                           | 1.91E-04            | 6.08                 | 6.3E-02                   | 3.20               |
| GO Biological<br>Process | GO:0042752                                                | regulation of circadian rhythm                                     | 2.23E-04            | 4.52                 | 3.2E-01                   | 1.51               |
| GO Biological<br>Process | GO:0007623                                                | circadian rhythm                                                   | 2.52E-03            | 2.34                 | 7.6E-02                   | 1.80               |

Shown are results of the region-based (binomial) and gene-based (hypergeometric) functional enrichment test for all circadian rhythm related annotations tested using the GREAT method [1]. Differentially methylated probes (DMPs) were used as input and show a consistent signal of enrichment for LTL-associated CpG sites.

**Supplementary Table 2. Functional enrichment analysis highlights blood coagulation and wound healing annotations.**

| Ontology              | ID                                                 | Description                                                   | Binomial p-value | Region Enrichment | Hypergeometric p-value | Gene Enrichment |
|-----------------------|----------------------------------------------------|---------------------------------------------------------------|------------------|-------------------|------------------------|-----------------|
| GO Biological Process | GO:0009611                                         | response to wounding                                          | 4.6E-10          | 1.76              | 1.4E-06                | 1.63            |
| GO Biological Process | GO:0042060                                         | wound healing                                                 | 1.7E-08          | 1.87              | 2.4E-07                | 1.90            |
| GO Biological Process | GO:0007596                                         | blood coagulation                                             | 9.8E-08          | 1.96              | 2.5E-06                | 1.91            |
| GO Biological Process | GO:0007599                                         | hemostasis                                                    | 1.2E-07          | 1.95              | 3.3E-06                | 1.89            |
| MSigDB Pathway        | REACTOME_HEMOSTASIS                                | Genes involved in Hemostasis                                  | 9.2E-07          | 1.94              | 1.1E-05                | 1.89            |
| GO Biological Process | GO:0061041                                         | regulation of wound healing                                   | 7.5E-05          | 2.65              | 2.2E-04                | 2.85            |
| GO Biological Process | GO:0060055                                         | angiogenesis involved in wound healing                        | 3.7E-03          | 6.48              | 1.1E-01                | 3.42            |
| GO Biological Process | GO:0030193                                         | regulation of blood coagulation                               | 4.6E-05          | 3.29              | 1.3E-03                | 2.89            |
| GO Biological Process | GO:0050818                                         | regulation of coagulation                                     | 5.4E-05          | 3.11              | 7.9E-04                | 2.89            |
| GO Biological Process | GO:0030195                                         | negative regulation of blood coagulation                      | 5.8E-05          | 5.42              | 1.7E-02                | 2.85            |
| GO Biological Process | GO:0050819                                         | negative regulation of coagulation                            | 9.2E-05          | 4.58              | 7.9E-03                | 2.99            |
| GO Biological Process | GO:0030194                                         | positive regulation of blood coagulation                      | 7.2E-03          | 4.23              | 9.6E-02                | 2.70            |
| GO Biological Process | GO:0072378                                         | blood coagulation, fibrin clot formation                      | 8.6E-03          | 4.05              | 6.3E-03                | 4.07            |
| GO Biological Process | GO:0050820                                         | positive regulation of coagulation                            | 9.5E-03          | 3.95              | 1.2E-01                | 2.44            |
| GO Biological Process | GO:0007597                                         | blood coagulation, intrinsic pathway                          | 1.2E-02          | 4.58              | 1.8E-02                | 3.80            |
| PANTHER Pathway       | P00011                                             | Blood coagulation                                             | 3.0E-02          | 2.92              | 8.2E-02                | 2.14            |
| MSigDB Pathway        | REACTOME_FORMATION_OF_FIBRIN_CLOT_CLOTTING_CASCADE | Genes involved in Formation of Fibrin Clot (Clotting Cascade) | 3.0E-02          | 2.92              | 4.1E-02                | 2.59            |
| MSigDB Pathway        | KEGG_COMPLEMENT_AND_COAGULATION_CASCADES           | Complement and coagulation cascades                           | 1E-01            | 1.90              | 5.8E-01                | 0.99            |

Shown are results of the region-based (binomial) and gene-based (hypergeometric) functional enrichment test for all coagulation and wound-healing related annotations tested using the GREAT method. Differentially methylated probes were used as input and show a consistent signal of enrichment for LTL-associated CpG sites.

Here, subtelomeric regions included both ends of chromosomes. The ends were proportional (5% for

Chr 1      5%      Chromosome length = 249,250,621      5%      12Mb

Chr 2      5%      Chromosome length = 243,199,373      5%      12Mb

Chr 3      5%      Chromosome length = 198,022,430      5%      10Mb

⋮

We focused on the 823 significant CpG sites that were associated with the fully adjusted LTL. We counted the number of positive and negative Z-scores in non-subtelomeric and subtelomeric regions. The proportion

## AGING

**Supplementary Table 3. Significant LTL-DNA correlations by their sign (positive vs negative) and genomic location.**

|          | Non-subtelomeric | Subtelomeric | Total |
|----------|------------------|--------------|-------|
| Negative | 594              | 136          | 730   |
| Positive | 65               | 28           | 93    |
| Total    | 659              | 164          | 823   |

Pearson's Chi-squared test with Yates' continuity correction.

$\chi^2$ -squared = 6.1099, df = 1, p-value = 0.01344

The chance of having significant CpGs was slightly higher in non-subtelomeric bodies than in subtelomeric regions (P=0.0427).

**Supplementary Table 4. LTL-DNA correlations by their significance and genomic location.**

|                            | Non-subtelomeric | Subtelomeric | Total   |
|----------------------------|------------------|--------------|---------|
| Non-significant (P>=1E-07) | 339,775          | 101,272      | 441,047 |
| Significant (P<1E-07)      | 659              | 164          | 823     |
| Total                      | 340,434          | 101,436      | 441,870 |

Pearson's Chi-squared test with Yates' continuity correction.

$\chi^2$ -squared = 4.1074, df = 1, p-value = 0.0427

### Summary-data-based Mendelian randomization

**Supplementary Table 5. Significant causal effects of 16 CpGs on LTL.**

| CpG        | SNP        | Gene         | Chr | Global<br>EWAS<br>meta Z (P) | GWAS of<br>LTL <sup>1</sup><br>beta (P) | mQTL <sup>2</sup><br>beta (P) | SMR <sup>3</sup><br>beta (P) | HEIDI <sup>4</sup><br>P-value |
|------------|------------|--------------|-----|------------------------------|-----------------------------------------|-------------------------------|------------------------------|-------------------------------|
| cg00622799 | rs909334   | RTEL1        | 20  | -5.53 (3E-08)                | 0.04 (4E-05)                            | -0.23 (2E-10)                 | -0.17 (6E-04)                | 2.1E-01                       |
| cg19841423 | rs2427533  | ZGPAT;LIME1  | 20  | -8.44 (3E-17)                | 0.03 (2E-03)                            | 0.64 (4E-78)                  | 0.04 (3E-03)                 | 2.3E-06                       |
| cg04363228 | rs2734335  | PBX2         | 6   | -6.22 (5E-10)                | 0.02 (2E-03)                            | 0.29 (1E-18)                  | 0.08 (3E-03)                 | 9.5E-02                       |
| cg18909389 | rs497309   | CLIC1        | 6   | -5.40 (7E-08)                | -0.04 (3E-03)                           | -0.72 (3E-57)                 | 0.05 (3E-03)                 | 5.9E-03                       |
| cg27259408 | rs3181049  | FDX1L;RAVER1 | 19  | -5.39 (7E-08)                | 0.03 (3E-03)                            | 0.45 (7E-27)                  | 0.07 (4E-03)                 | 3.2E-01                       |
| cg23531049 | rs17678767 | MAPKBP1      | 15  | -6.40 (2E-10)                | 0.02 (5E-03)                            | -0.42 (3E-36)                 | -0.05 (7E-03)                | 1.4E-01                       |
| cg03443360 | rs642758   | PTPRA        | 20  | -5.37 (8E-08)                | -0.02 (4E-03)                           | 0.23 (2E-12)                  | -0.09 (7E-03)                | 5.2E-01                       |
| cg03609639 | rs888208   | NKX2-3       | 10  | -5.47 (5E-08)                | -0.02 (1E-02)                           | 0.49 (6E-42)                  | -0.04 (2E-02)                | 4.7E-01                       |
| cg13754259 | rs11190128 | NKX2-3       | 10  | -6.18 (6E-10)                | -0.03 (2E-02)                           | 0.29 (9E-16)                  | -0.10 (2E-02)                | 5.4E-01                       |
| cg00686926 | rs6806847  | GRK7         | 3   | -5.40 (7E-08)                | 0.02 (2E-02)                            | 0.78 (2E-111)                 | 0.02 (2E-02)                 | 1.4E-02                       |
| cg01289541 | rs9880460  | SLC7A14      | 3   | 5.66 (2E-08)                 | 0.02 (3E-02)                            | 0.25 (1E-14)                  | 0.06 (3E-02)                 | 1.1E-02                       |
| cg12054453 | rs8078424  | TMEM49       | 17  | 5.93 (3E-09)                 | 0.02 (4E-02)                            | -0.57 (3E-55)                 | -0.03 (4E-02)                | 6.4E-01                       |
| cg16936953 | rs8078424  | TMEM49       | 17  | 5.63 (2E-08)                 | 0.02 (4E-02)                            | -0.47 (2E-37)                 | -0.04 (4E-02)                | 8.3E-01                       |
| cg24531955 | rs11777755 | LOXL2        | 8   | 5.47 (5E-08)                 | -0.02 (4E-02)                           | -0.33 (2E-20)                 | 0.05 (5E-02)                 | 9.8E-01                       |
| cg21415060 | rs3027077  | FCER1A       | 1   | -5.35 (9E-08)                | -0.02 (3E-02)                           | -0.23 (2E-08)                 | 0.09 (5E-02)                 | 6.6E-01                       |
| cg14384960 | rs13120596 | ZNF827       | 4   | -5.37 (8E-08)                | -0.02 (4E-02)                           | 0.18 (2E-08)                  | -0.09 (5E-02)                | 9.5E-01                       |

<sup>1</sup>GWAS of LTL conducted by Codd and colleagues (2013), downloaded from <https://downloads.icbru.le.ac.uk/engage>

<sup>2</sup>Methylation Quantitative trait locus (mQTL) provided by McRae and colleagues (2017), downloaded from [http://cnsngenomics.com/data/SMR/LBC\\_BSGS\\_meta.tar.gz](http://cnsngenomics.com/data/SMR/LBC_BSGS_meta.tar.gz)

<sup>3</sup>Summary-data-based Mendelian randomization (SMR) as proposed by Zhu and colleagues (2016).

<sup>4</sup>Heterogeneity in independent instruments (HEIDI) test.

**Supplementary Table 6. Complex traits associated with the 22 cis-mQTL SNPs.**

| PMID     | DISEASE/TRAIT                                              | REGION   | CHR | CHR_POS   | REPORTED GENE(S) | SNPS       | RISK ALLELE FREQUENCY | P-VALUE  |
|----------|------------------------------------------------------------|----------|-----|-----------|------------------|------------|-----------------------|----------|
| 28416818 | Atrial fibrillation                                        | 2p14     | 2   | 65057097  | CEP68            | rs2540949  | 0.6100                | 3.00E-10 |
| 27863252 | Neutrophil percentage of granulocytes                      | 1p34.2   | 1   | 41905743  | HIVEP3           | rs2147904  | 0.5644                | 1.00E-09 |
| 27863252 | Platelet count                                             | 19p13.12 | 19  | 16083694  | TPM4             | rs17708984 | 0.2879                | 6.00E-16 |
| 27863252 | Platelet distribution width                                | 19p13.12 | 19  | 16083694  | TPM4             | rs17708984 | 0.2882                | 2.00E-14 |
| 28448500 | Waist circumference adjusted for body mass index           | 10q22.3  | 10  | 79147390  | ZMIZ1            | rs780159   | 0.5817                | 2.00E-06 |
| 28448500 | Waist circumference adjusted for body mass index           | 10q22.3  | 10  | 79147390  | ZMIZ1            | rs780159   | 0.5817                | 6.00E-09 |
| 28448500 | Waist circumference adjusted for body mass index           | 10q22.3  | 10  | 79147390  | ZMIZ1            | rs780159   | 0.5940                | 9.00E-09 |
| 28448500 | Waist circumference adjusted for BMI in active individuals | 10q22.3  | 10  | 79147390  | ZMIZ1            | rs780159   | 0.5817                | 3.00E-07 |
| 28448500 | Waist circumference adjusted for BMI in active individuals | 10q22.3  | 10  | 79147390  | ZMIZ1            | rs780159   | 0.5940                | 5.00E-07 |
| 28448500 | Waist circumference adjusted for BMI                       | 10q22.3  | 10  | 79147390  | ZMIZ1            | rs780159   | 0.5817                | 5.00E-08 |
| 28448500 | Waist circumference adjusted for BMI                       | 10q22.3  | 10  | 79147390  | ZMIZ1            | rs780159   | 0.5940                | 1.00E-07 |
| 27863252 | Eosinophil counts                                          | 1p34.2   | 1   | 41905743  | HIVEP3           | rs2147904  | 0.5644                | 1.00E-14 |
| 27863252 | Eosinophil percentage of granulocytes                      | 1p34.2   | 1   | 41905743  | HIVEP3           | rs2147904  | 0.5644                | 2.00E-12 |
| 27863252 | Sum eosinophil basophil counts                             | 1p34.2   | 1   | 41905743  | HIVEP3           | rs2147904  | 0.5645                | 2.00E-12 |
| 27863252 | Eosinophil percentage of white cells                       | 1p34.2   | 1   | 41905743  | HIVEP3           | rs2147904  | 0.5644                | 2.00E-13 |
| 30061737 | Atrial fibrillation                                        | 2p14     | 2   | 65057097  | CEP68            | rs2540949  | 0.6150                | 3.00E-22 |
| 29892015 | Atrial fibrillation                                        | 2p14     | 2   | 65057097  | CEP68            | rs2540949  | 0.6200                | 8.00E-25 |
| 28604730 | Lung cancer                                                | 6p21.33  | 6   | 31872700  | SLC44A4          | rs501942   | 0.0986                | 8.00E-19 |
| 28604730 | Lung cancer in ever smokers                                | 6p21.33  | 6   | 31872700  | SLC44A4          | rs501942   | 0.1010                | 3.00E-14 |
| 30595370 | Eczema                                                     | 1q25.1   | 1   | 173194429 |                  | rs7518129  | NR                    | 4.00E-18 |
| 30048462 | Heel bone mineral density                                  | 4q31.22  | 4   | 145914638 |                  | rs6816078  | NR                    | 3.00E-18 |
| 30595370 | Lung function (FEV1/FVC)                                   | 17q25.1  | 17  | 75523332  |                  | rs8064529  | NR                    | 1.00E-09 |

<sup>1</sup>GWAS catalogue database (v1.02) was downloaded from <https://www.ebi.ac.uk/gwas/docs/file-downloads>

## Sensitivity analyses

### *Comparison of the biweight midcorrelation and ordinary linear regression*

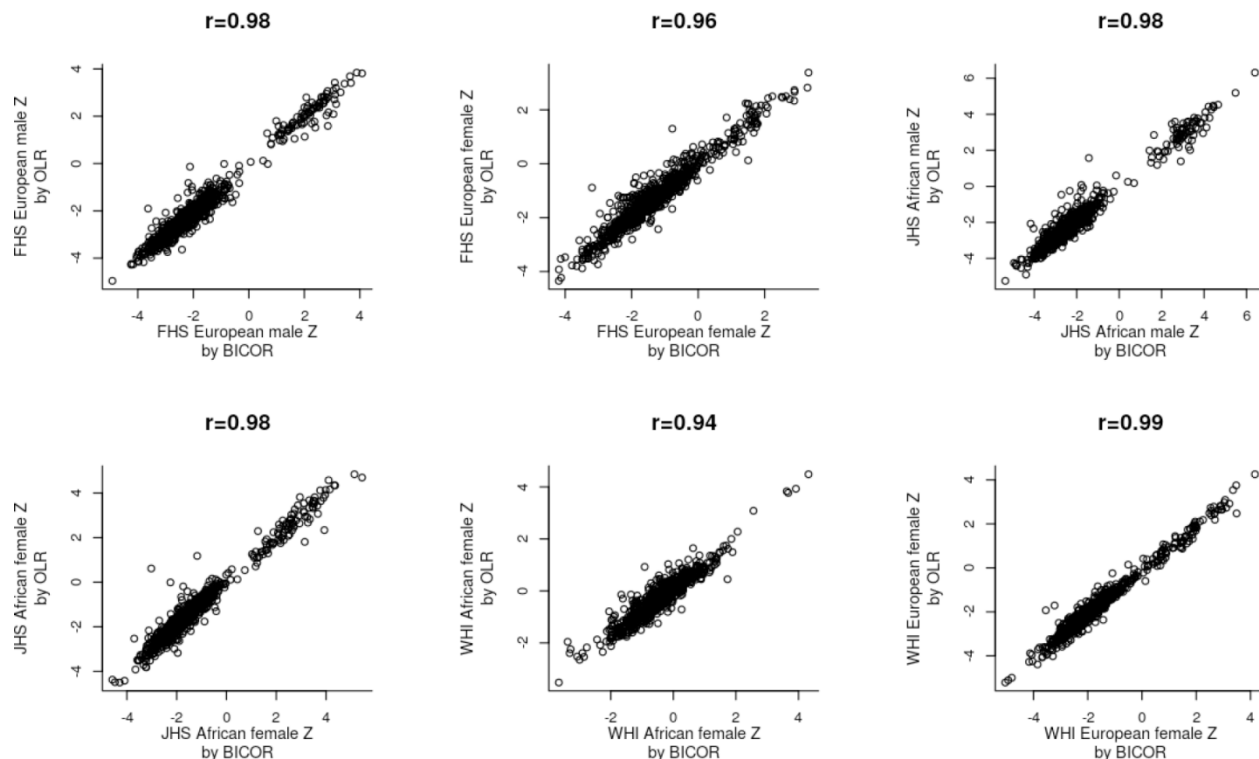

**Supplementary Figure 3. Comparison of the BICOR and OLR method.**

We conducted a sensitivity analysis to compare the biweight midcorrelation (BICOR) and ordinary linear regression (OLR) method for the EWAS of LTL. The panel above displays the Z scores generated by the BICOR and by the OLR method in the six strata (Supplementary Figure 3). The LTL was adjusted for

age and the blood cell counts in each sex and ethnicity specific stratum as it was in the original analysis using the BICOR method. We replaced the BICOR with the OLR. For a clear presentation of results, we focused on the 823 significant CpG sites (fully adjusted) in this sensitivity analysis.

### Additional adjustment for BMI (and education)

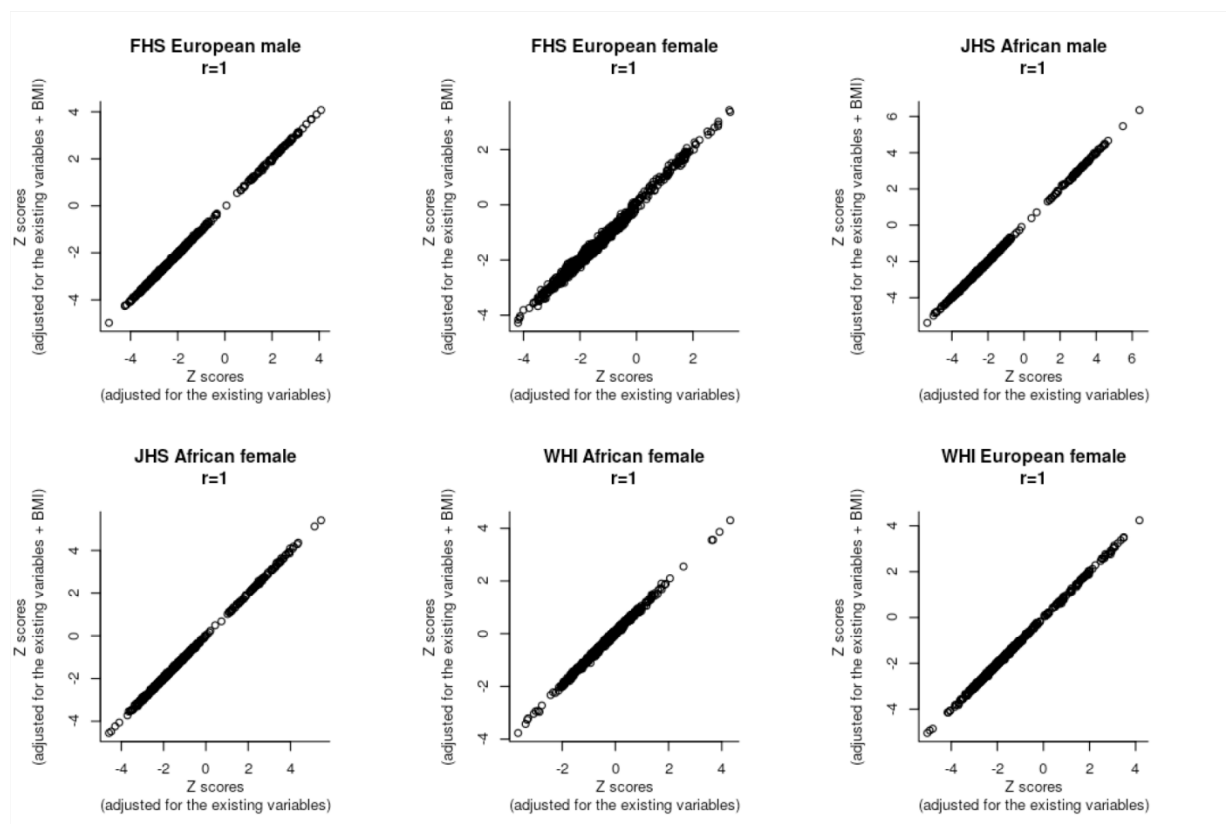

**Supplementary Figure 4. Sensitivity analysis with or without additional adjustment for BMI.**

We conducted a sensitivity analysis with and without additional adjustment for BMI using the three cohorts (FHS, JHS and WHI). Supplementary Figure 4 reveals that the Z scores adjusted for the existing variables (age,

sex, ethnicity and blood cell counts) were almost same as the Z score adjusted for the existing variable and BMI. We did not observe any significant change.

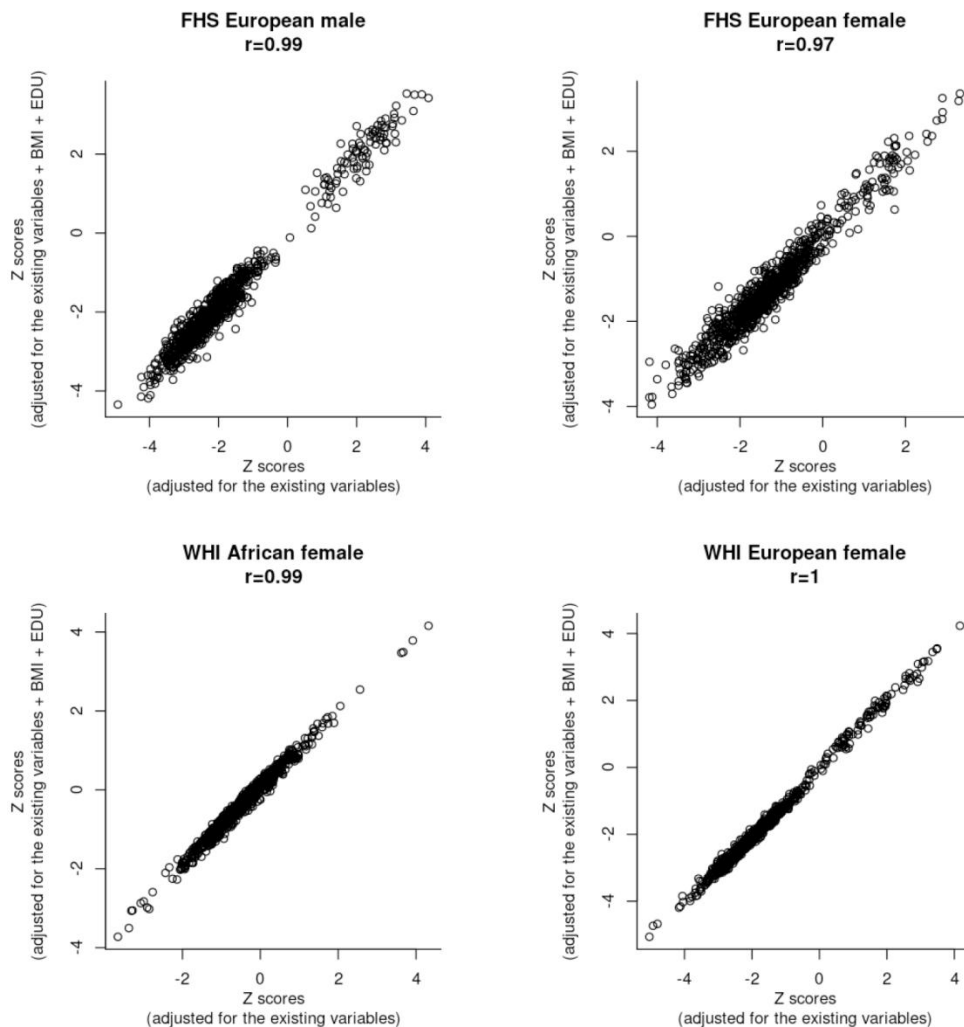

**Supplementary Figure 5. Sensitivity analysis with or without additional adjustment for BMI and education.**

We conducted another sensitivity analysis with and without additional adjustment for BMI and education using FHS and WHI. The education attainment of the

JHS subjects was missing. Again, we did not observe any change by the additional adjustment for BMI and education.

**Consistency across the cohorts (FHS, JHS, WHI, BHS, LBC21, LBC36 and LSADT)**

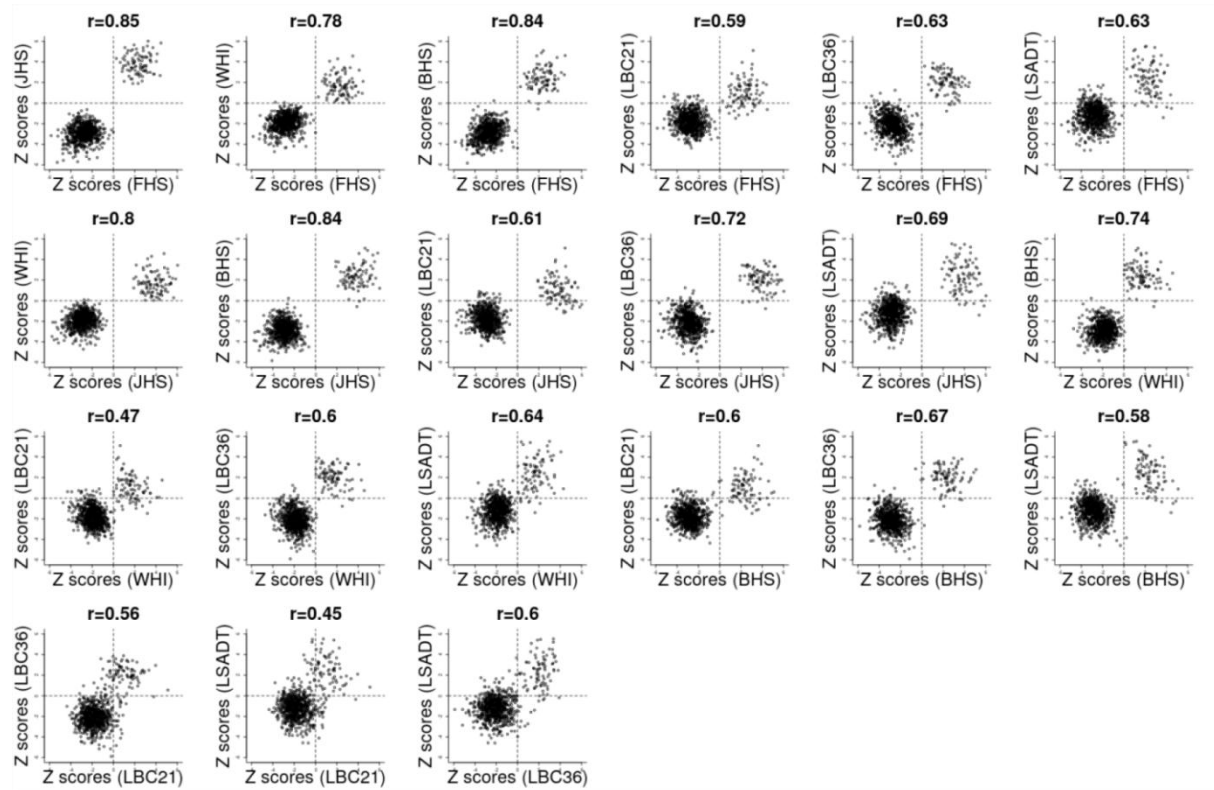

**Supplementary Figure 6. Comparison the results across the seven cohorts.**

We have also conducted a cohort-specific meta-analysis. We found the rough but consistent LTL-DNAM associations at the 823 CpG sites across the seven cohorts. Supplementary Figure 6 displays the Z scores from two cohorts using scatter plots (21 possible

pairs/panels). The Stouffer's method ( $\sum Z_i w_i / \sqrt{\sum w_i^2}$ , where  $w_i$  is the square root of the sample size in the  $i$ th stratum) was used to combine corresponding strata for each cohort.

## Study cohort

### *The Framingham Heart Study (FHS)*

FHS started in 1948 to investigate common risk factors for cardiovascular disease (CVD) [2]. FHS recruited 5,209 subjects who lived in Framingham, Massachusetts, USA, and who were free from symptoms of CVD, heart attack or stroke at enrollment. The FHS Offspring Cohort started in 1971 and enrolled the original participants' grown-up children and the children's spouses (n=5,124) [3]. Our study included 874 participants from the FHS Offspring Cohort who attended the sixth and eighth examination and consented to the use of their bio-specimens for research purposes. Data from FHS can be retrieved from dbGaP (under accession numbers phs000363.v16.p10 and phs000724.v2.p9).

#### Telomere length measurement:

DNA was extracted from leukocytes collected from the sixth examination cycle. Participants who had enough buffy coat available were selected for LTL measurement. The Southern blot method was used to obtain the mean length of the terminal restriction fragment (TRF) as previously described [4]. The coefficient of variation was 2.4% for the LTL measurement of duplicate and triplicate DNA samples.

#### DNA methylation:

The Gentra Puregene DNA extraction kit (Qiagen) was used to extract genomic DNA from whole blood, which was then bisulfite-converted using the EZ DNA Methylation kit (Zymo Research Corporation). Data from FHS are accessible through dbGaP (accession numbers phs000363.v16.p10 and phs000724.v2.p9). FHS used the 'normal-exponential out-of-band' (noob, [5]) normalization method from the *R* package minfi [6].

### *The Jackson Heart Study (JHS)*

JHS recruited 5,306 African Americans to investigate risk factors for cardiovascular disease in the Jackson metropolitan area, Mississippi, USA [7]. Participants provided medical and social records, physical and biochemical measurements, information on diagnostic procedures, and DNA samples during a baseline examination (2000-2004), and two follow-up examinations (2005-2008 and 2009-2012). JHS follows up the participants every year and maintains cohort surveillance. Our study included the participants who visited at the baseline examination as part of the ancillary study ASN0104 in JHS.

#### Telomere length measurement:

The Puregene kit (Gentra System, Minneapolis, MN, USA) [8] was used to extract DNA from whole blood. LTL (in kilobases) was measured using Southern blot [9]. The inter-assay coefficient of variation was 2.0%.

The interclass correlation coefficient was 0.95 for individual measures of LTL.

#### DNA methylation:

DNA was extracted using the Gentra Puregene blood kit (Gentra System, MN, Minnesota, USA). JHS used the noob normalization method from the *R* package minfi [5, 10].

### *The Women's Health Initiative (WHI)*

WHI started in 1992 and enrolled 64,500 postmenopausal women aged between 50 and 79 years into either clinical trials or observational studies [11]. Our study included WHI participants with available phenotype and DNA methylation array data referred to as the WHI "Broad Agency Award 23" (WHI BA23). WHI BA23 aimed to identify miRNA and genomic biomarkers of coronary heart disease.

#### Telomere length measurement:

DNA was extracted from blood samples collected at the time of the 2012–2013 visit, using the 5-prime method (5 PRIME, Inc.; Gaithersburg, MD). Prior to LTL measurement, DNA integrity was assessed visually after ethidium bromide-stained 1% agarose gel electrophoresis (200 V for 2 hours). The Southern blot method was used to measure the average length of the terminal restriction fragments (in kilobases) [12]. Individual samples were measured in duplicate on different gels. The average inter-assay coefficient of variation was 2.0%.

#### DNA methylation:

Among many sub-studies, only WHI BA23 provided both blood-based LTL and DNAm array data. WHI BA23 used the background correction method from Illumina's proprietary GenomeStudio software.

### *The Bogalusa Heart Study (BHS)*

BHS started in 1972 and recruited multiple waves of participants from childhood, adolescent and adulthood in a biracial community in Bogalusa, Louisiana, USA, comprising 65% whites and 35% African Americans [13]. The longitudinal cardiovascular risk factor phenotype and genotype data of the BHS cohort are available via application through the NHLBI Biologic Specimen and Data Repository Information Coordinating Center website (<https://biolincc.nhlbi.nih.gov/studies/bhs>).

#### Telomere length measurement:

LTL was measured by Southern blot, as in the above studies. DNA was hybridized to a digoxigenin 3'-end labeled 5'-(CCCTAA)<sub>3</sub> telomeric probe after overnight DNA digestion with 10 U Hinf I and 10 U Rsa I restriction enzymes as previously described [14]. Digitized autoradiograms of LTL measurement were analyzed for each sample resolved in duplicate on

different gels, and the coefficient of variation for the duplicate samples was 1.4% [14].

#### DNA methylation:

Genomic DNA was isolated from whole blood samples in BHS using the FlexiGene DNA extraction kit (Qiagen, Hilden, Germany). The Infinium HumanMethylation450K BeadChip (Illumina, San Diego, California, USA) was used for whole-genome DNAm analysis. Samples were processed at the Microarray Core Facility Lab, University of Texas Southwestern Medical Center, Dallas, Texas, USA. For each subject, 750 ng of genomic DNA was bisulfite-converted using the 96-well EZ DNAm kit (Zymo Research, Irvine, California, USA) according to the manufacturer's instructions. The efficiency of the bisulfite conversion was confirmed by in-built controls on the 450K array. The methylation profile of each participant was measured by processing 4 µl of bisulfite-converted DNA, at a concentration of 50 ng/µl, on an Illumina 450K array. The bisulfite-converted DNA was amplified, fragmented and hybridized to the array following the protocol. We scanned the arrays by using an Illumina iScan scanner, and then the raw methylation data was extracted using Illumina's GenomeStudio Methylation (M) Module. BHS used the data-driven separate normalization method (dasen, [15]) from the *R* package watermelon [15]. The probe exclusion criteria for filtering samples and probes were: 1) samples having 1% of CpG sites with a detection p-value greater than 0.05; 2) probes having 5% of samples with a detection p-value greater than 0.05; 3), and probes with bead count less than 3 in 5% of the samples.

#### ***The Lothian Birth Cohorts (LBC)***

The Lothian Birth Cohorts of 1921 (LBC21) and 1936 (LBC36) are longitudinal studies of cognitive aging in individuals born in 1921 and 1936, respectively [16]. At age 11, these individuals had completed the Moray House Test of general intelligence as part of the Scottish Mental Surveys of 1932 and 1947. Decades later, individuals living in Edinburgh and the surrounding areas were contacted and invited to participate in wave 1 of the Lothian Birth Cohort (LBC) studies. Of those born in 1921, 550 individuals were recruited between 1999 and 2001 at mean age of 79. Of those born in 1936, 1091 individuals were recruited between 2004 and 2007 at mean age 70. Since then, extensive phenotypic data have been collected roughly every three years in four further waves of testing. The data collection includes detailed physical, cognitive, psychosocial and lifestyle measures. In addition, genetic and epigenetic data are available in both LBC21 and LBC36. More details on recruitment and testing can be found elsewhere [17, 18]. Our study here uses data obtained in the first wave of testing.

#### Telomere length measurement:

Telomere length in the LBC21 and LBC36 was measured in wave 1 using a quantitative real-time polymerase chain reaction (qPCR) assay [19]. DNA was extracted from whole blood at the Wellcome Trust Clinical Research Facility Genetics Core at the Western General Hospital in Edinburgh using standard procedures. A 7900HT Fast Real Time PCR machine with 384-well plate capacity (Applied Biosystems; Pleasanton, California, USA) was used to perform the PCRs. Telomere length was measured as the ratio of telomeric template to glyceraldehyde 3-phosphate dehydrogenase. Four internal control DNA samples derived from cell lines of known absolute telomere length were included on each plate to correct for plate-to-plate variation, and measurements were performed in quadruplicate and the mean was used in further assessments.

#### DNA methylation:

LBC used internal controls from the *R* package minfi to correct for background noise. Following this, samples of low quality, e.g. those with bisulfite conversion, staining signal, inadequate hybridization or nucleotide extension, were excluded. In addition, probes with a detection rate <95% at  $p < 0.01$  and samples with a low call rate (<450,000 probes detected at  $p < 0.01$ ) were removed. Finally, samples for which DNA-methylation predicted sex did not match reported sex and samples that showed a poor match between SNP control probes and genotype were removed.

#### ***The Longitudinal Study of Aging Danish Twins (LSADT)***

LSADT was initiated in 1995 and recruited all Danish twins aged 70 years or more [9, 10]. Surviving twins were surveyed every other year until 2007. In 1997, whole-blood samples were collected from 689 same-sex twins. For 310 of these individuals, genome-wide DNAm data was available. The present study includes all twin pairs who participated in the 1997 wave and for whom genome-wide DNA methylation data and LTL measurements were available.

#### Telomere length measurement:

LTL was measured using Southern blot. The LTL measurement referred to the average terminal restriction fragments after digestion with *HinfI* and *RsaI* restriction enzymes as previously described [9]. The two LTL measures presented a high correlation ( $r = 0.88$ ,  $p = 0.000$ ). Each sample was used in duplicate on different gels. The inter-assay coefficient of variation was 2.5% (for the *HinfI/RsaI* digest).

#### DNA methylation:

The EZ Methylation Gold kit (Zymo Research, Orange County, California, USA) was used to isolate DNA

from buffy coats. LSADT used the functional normalization method [10] from the **R** package minfi for normalization of the methylation data. The following criteria were used for sample exclusion: firstly, samples where less than 95% of the probes had a detection P-value < 0.01, and secondly, samples that failed inspection of the internal quality control probes of the bead chip, which is done using the **R**/Bioconductor package MethylAid for identifying low-quality samples (see van Iterson et al. (2014) for details, [20]). Probes were excluded if they satisfied at least one of the following criteria: a detection P-value >0.01, a raw intensity value of zero, a low bead count (< 3 beads), were identified as being cross reactive [21], and/or had a measurement success rate below 95%. After probe filtering, the criterion of 95% sample success rate was applied to the remaining data none of the samples had a lower sample success rate and therefore none of them was excluded at this step (see Debrabant et al. (2018) for further details regarding the LSADT DNA methylation data [22]).

## REFERENCES

- McLean CY, Bristor D, Hiller M, Clarke SL, Schaar BT, Lowe CB, Wenger AM, Bejerano G. GREAT improves functional interpretation of cis-regulatory regions. *Nat Biotechnol.* 2010; 28:495–501. <https://doi.org/10.1038/nbt.1630> PMID:20436461
- Dawber TR, Meadors GF, Moore FE Jr. Epidemiological approaches to heart disease: the Framingham Study. *Am J Public Health Nations Health.* 1951; 41:279–81. <https://doi.org/10.2105/AJPH.41.3.279> PMID:14819398
- Kannel WB, Feinleib M, McNamara PM, Garrison RJ, Castelli WP. An investigation of coronary heart disease in families. The Framingham offspring study. *Am J Epidemiol.* 1979; 110:281–90. <https://doi.org/10.1093/oxfordjournals.aje.a112813> PMID:474565
- Huzen J, van Veldhuisen DJ, van der Harst P. Letter by Huzen et al regarding article, “Association of leukocyte telomere length with circulating biomarkers of the renin-angiotensin-aldosterone system: the Framingham Heart Study”. *Circulation.* 2008; 118:e688. <https://doi.org/10.1161/CIRCULATIONAHA.108.775510> PMID:18981308
- Triche TJ Jr, Weisenberger DJ, Van Den Berg D, Laird PW, Siegmund KD. Low-level processing of Illumina Infinium DNA Methylation BeadArrays. *Nucleic Acids Res.* 2013; 41:e90. <https://doi.org/10.1093/nar/gkt090> PMID:23476028
- Aryee MJ, Jaffe AE, Corrada-Bravo H, Ladd-Acosta C, Feinberg AP, Hansen KD, Irizarry RA. Minfi: a flexible and comprehensive Bioconductor package for the analysis of Infinium DNA methylation microarrays. *Bioinformatics.* 2014; 30:1363–69. <https://doi.org/10.1093/bioinformatics/btu049> PMID:24478339
- Taylor HA Jr, Wilson JG, Jones DW, Sarpong DF, Srinivasan A, Garrison RJ, Nelson C, Wyatt SB. Toward resolution of cardiovascular health disparities in African Americans: design and methods of the Jackson Heart Study. *Ethn Dis.* 2005 Autumn;15(4 Suppl 6):S6-4-17. PMID:16320381
- Carpenter MA, Crow R, Steffes M, Rock W, Heilbraun J, Evans G, Skelton T, Jensen R, Sarpong D. Laboratory, reading center, and coordinating center data management methods in the Jackson Heart Study. *Am J Med Sci.* 2004; 328:131–44. <https://doi.org/10.1097/00000441-200409000-00001> PMID:15367870
- Kimura M, Stone RC, Hunt SC, Skurnick J, Lu X, Cao X, Harley CB, Aviv A. Measurement of telomere length by the Southern blot analysis of terminal restriction fragment lengths. *Nat Protoc.* 2010; 5:1596–607. <https://doi.org/10.1038/nprot.2010.124> PMID:21085125
- Fortin JP, Triche TJ Jr, Hansen KD. Preprocessing, normalization and integration of the Illumina HumanMethylationEPIC array with minfi. *Bioinformatics.* 2017; 33:558–60. PMID:28035024
- Anderson G, et al, and The Women’s Health Initiative Study Group. Design of the Women’s Health Initiative clinical trial and observational study. *Control Clin Trials.* 1998; 19:61–109. [https://doi.org/10.1016/S0197-2456\(97\)00078-0](https://doi.org/10.1016/S0197-2456(97)00078-0) PMID:9492970
- Loprinzi PD, Loenneke JP, Blackburn EH. Movement-Based Behaviors and Leukocyte Telomere Length among US Adults. *Med Sci Sports Exerc.* 2015; 47:2347–52. <https://doi.org/10.1249/MSS.0000000000000695> PMID:25970659
- Berenson GS, Co-Investigators BH. Bogalusa Heart Study: a long-term community study of a rural biracial (black/white) population. *Am J Med Sci.* 2001; 322:267–74. <https://doi.org/10.1097/00000441-200111000-00007> PMID:11721800
- Aviv A, Chen W, Gardner JP, Kimura M, Brimacombe M, Cao X, Srinivasan SR, Berenson GS. Leukocyte telomere dynamics: longitudinal findings among young adults in the Bogalusa Heart Study. *Am J*

- Epidemiol. 2009; 169:323–29.  
<https://doi.org/10.1093/aje/kwn338> PMID:[19056834](https://pubmed.ncbi.nlm.nih.gov/19056834/)
15. Pidsley R, Y Wong CC, Volta M, Lunnon K, Mill J, Schalkwyk LC. A data-driven approach to preprocessing Illumina 450K methylation array data. *BMC Genomics*. 2013; 14:293.  
<https://doi.org/10.1186/1471-2164-14-293>  
 PMID:[23631413](https://pubmed.ncbi.nlm.nih.gov/23631413/)
  16. Deary IJ, Gow AJ, Pattie A, Starr JM. Cohort profile: the Lothian Birth Cohorts of 1921 and 1936. *Int J Epidemiol*. 2012; 41:1576–84.  
<https://doi.org/10.1093/ije/dyr197>  
 PMID:[22253310](https://pubmed.ncbi.nlm.nih.gov/22253310/)
  17. Shah S, McRae AF, Marioni RE, Harris SE, Gibson J, Henders AK, Redmond P, Cox SR, Pattie A, Corley J, Murphy L, Martin NG, Montgomery GW, et al. Genetic and environmental exposures constrain epigenetic drift over the human life course. *Genome Res*. 2014; 24:1725–33.  
<https://doi.org/10.1101/gr.176933.114>  
 PMID:[25249537](https://pubmed.ncbi.nlm.nih.gov/25249537/)
  18. Marioni RE, Shah S, McRae AF, Chen BH, Colicino E, Harris SE, Gibson J, Henders AK, Redmond P, Cox SR, Pattie A, Corley J, Murphy L, et al. DNA methylation age of blood predicts all-cause mortality in later life. *Genome Biol*. 2015; 16:25.  
<https://doi.org/10.1186/s13059-015-0584-6>  
 PMID:[25633388](https://pubmed.ncbi.nlm.nih.gov/25633388/)
  19. Martin-Ruiz C, Saretzki G, Petrie J, Ladhoff J, Jeyapalan J, Wei W, Sedivy J, von Zglinicki T. Stochastic variation in telomere shortening rate causes heterogeneity of human fibroblast replicative life span. *J Biol Chem*. 2004; 279:17826–33.  
<https://doi.org/10.1074/jbc.M311980200>  
 PMID:[14963037](https://pubmed.ncbi.nlm.nih.gov/14963037/)
  20. van Iterson M, Tobi EW, Slieker RC, den Hollander W, Luijk R, Slagboom PE, Heijmans BT. MethylAid: visual and interactive quality control of large Illumina 450k datasets. *Bioinformatics*. 2014; 30:3435–37.  
<https://doi.org/10.1093/bioinformatics/btu566>  
 PMID:[25147358](https://pubmed.ncbi.nlm.nih.gov/25147358/)
  21. Chen YA, Lemire M, Choufani S, Butcher DT, Grafodatskaya D, Zanke BW, Gallinger S, Hudson TJ, Weksberg R. Discovery of cross-reactive probes and polymorphic CpGs in the Illumina Infinium HumanMethylation450 microarray. *Epigenetics*. 2013; 8:203–09.  
<https://doi.org/10.4161/epi.23470> PMID:[23314698](https://pubmed.ncbi.nlm.nih.gov/23314698/)
  22. Debraabant B, Soerensen M, Christiansen L, Tan Q, McGue M, Christensen K, Hjelmborg J. DNA methylation age and perceived age in elderly Danish twins. *Mech Ageing Dev*. 2018; 169:40–44.  
<https://doi.org/10.1016/j.mad.2017.09.004>  
 PMID:[28965790](https://pubmed.ncbi.nlm.nih.gov/28965790/)
