# Supplementary material for: Epigenome-wide association study of leukocyte telomere length
Source: Aging (Albany NY). 2019 Aug 26;11(16):5876–94. doi: 10.18632/aging.102230 (PMC6738430; doi:10.18632/aging.102230)
Supplement: Supplementary File 3 [file aging-11-102230-s001.xlsx]

## Sheet: FDR<0.05_all
Ontology	ID	Description	BinomP	RegionFoldEnrich	ExpRegions	ObsRegions	GenomeFrac	SetCov	HyperP	GeneFoldEnrich	ExpGenes	ObsGenes	TotalGenes	GeneSetCov	TermCov	BinomP_bonferroni	HyperP_bonferroni	Significance_group
GO Biological Process	GO:0009611	response to wounding	8.75258e-10	1.69807	80.6798	137	0.0949174	0.161177	1.54418e-06	1.58685	65.5387	104	1008	0.0886616	0.103175	1.50982e-06	0.00266371	Both
MSigDB Pathway	REACTOME_CIRCADIAN_CLOCK	Genes involved in Circadian Clock	2.14894e-08	3.85312	6.48825	25	0.00763324	0.0294118	3.8232e-06	4.14083	3.38097	14	52	0.0119352	0.269231	3.70691e-05	0.00659502	Both
GO Biological Process	GO:0051246	regulation of protein metabolic process	3.55518e-08	1.45622	132.535	193	0.155923	0.227059	3.85153e-06	1.4296	104.225	149	1603	0.127025	0.0929507	6.13269e-05	0.00664389	Both
GO Biological Process	GO:0032268	regulation of cellular protein metabolic process	6.10217e-08	1.4814	118.132	175	0.138979	0.205882	3.64247e-06	1.46478	91.4811	134	1407	0.114237	0.0952381	0.000105263	0.00628327	Both
GO Biological Process	GO:0042060	wound healing	7.18271e-08	1.77834	52.8583	94	0.0621862	0.110588	6.42799e-07	1.8124	39.7263	72	611	0.0613811	0.11784	0.000123902	0.00110883	Both
GO Biological Process	GO:0007596	blood coagulation	2.67655e-07	1.85957	40.8696	76	0.0480818	0.0894118	6.73947e-06	1.81124	32.5743	59	501	0.0502984	0.117764	0.000461705	0.0116256	Both
GO Biological Process	GO:0007599	hemostasis	3.24491e-07	1.85013	41.0781	76	0.0483272	0.0894118	9.14564e-06	1.79335	32.8994	59	506	0.0502984	0.116601	0.000559747	0.0157762	Both
GO Biological Process	GO:0048583	regulation of response to stimulus	5.233e-06	1.25663	229.184	288	0.269628	0.338823	1.34167e-08	1.39507	174.185	243	2679	0.207161	0.0907055	0.00902693	2.31439e-05	Both
GO Molecular Function	GO:0005515	protein binding	6.25276e-06	1.11713	525.451	587	0.618178	0.690588	2.34927e-06	1.14626	519.953	596	7997	0.508099	0.0745279	0.010786	0.00405249	Both
GO Biological Process	GO:0031323	regulation of cellular metabolic process	1.36841e-05	1.16403	374.561	436	0.44066	0.512941	1.19238e-05	1.19782	323.923	388	4982	0.330776	0.0778804	0.0236051	0.0205685	Both
GO Biological Process	GO:0019222	regulation of metabolic process	2.14357e-05	1.14955	401.895	462	0.472818	0.543529	3.96832e-06	1.19426	358.382	428	5512	0.364876	0.0776488	0.0369766	0.00684535	Both
GO Molecular Function	GO:0002161	aminoacyl-tRNA editing activity	2.3475e-12	31.053	0.32203	10	0.000378859	0.0117647	0.0712839	4.39435	0.45513	2	7	0.00170503	0.285714	4.04945e-09	1	Binomial
GO Biological Process	GO:0006450	regulation of translational fidelity	3.11927e-12	30.1569	0.331599	10	0.000390117	0.0117647	0.112172	3.41783	0.585167	2	9	0.00170503	0.222222	5.38075e-09	1	Binomial
PANTHER Pathway	P00015	Circadian clock system	1.41653e-11	20.6571	0.532504	11	0.000626475	0.0129412	0.0171214	5.12674	0.585167	3	9	0.00255755	0.333333	2.44351e-08	1	Binomial
GO Cellular Component	GO:0005829	cytosol	2.82183e-11	1.46143	177.224	259	0.208499	0.304706	7.71665e-05	1.27178	168.268	214	2588	0.182438	0.0826893	4.86765e-08	0.133112	Binomial
GO Cellular Component	GO:0044424	intracellular part	1.40422e-10	1.10197	681.504	751	0.80177	0.883529	0.000760161	1.05893	817.804	866	12578	0.738278	0.0688504	2.42227e-07	1	Binomial
GO Cellular Component	GO:0005622	intracellular	3.16612e-10	1.09846	685.507	753	0.806479	0.885882	0.00263376	1.05085	828.857	871	12748	0.742541	0.0683244	5.46156e-07	1	Binomial
MSigDB Pathway	KEGG_CIRCADIAN_RHYTHM_MAMMAL	Circadian rhythm - mammal	3.50628e-10	12.8924	0.930778	12	0.00109503	0.0141177	0.00791109	4.73238	0.845241	4	13	0.00341006	0.307692	6.04833e-07	1	Binomial
GO Cellular Component	GO:0044444	cytoplasmic part	7.31533e-10	1.19924	441.947	530	0.519938	0.623529	0.00016906	1.12842	457.276	516	7033	0.439898	0.0733684	1.2619e-06	0.291629	Binomial
GO Biological Process	GO:0002376	immune system process	1.55932e-09	1.50854	130.59	197	0.153635	0.231765	0.000209415	1.31536	116.318	153	1789	0.130435	0.0855226	2.68983e-06	0.361242	Binomial
GO Biological Process	GO:0002313	mature B cell differentiation involved in immune response	2.50046e-09	18.5979	0.483927	9	0.000569326	0.0105882	0.00100693	7.69011	0.520149	4	8	0.00341006	0.5	4.3133e-06	1	Binomial
GO Molecular Function	GO:0005488	binding	8.70584e-09	1.08705	694.544	755	0.81711	0.888235	0.000715632	1.06249	791.536	841	12174	0.716965	0.0690816	1.50176e-05	1	Binomial
GO Biological Process	GO:0097190	apoptotic signaling pathway	1.40184e-08	2.47471	19.8003	49	0.0232945	0.0576471	0.0016189	1.73911	18.4002	32	283	0.0272805	0.113074	2.41818e-05	1	Binomial
GO Biological Process	GO:0002335	mature B cell differentiation	1.41642e-08	15.1742	0.593111	9	0.000697778	0.0105882	0.00271871	6.15209	0.650186	4	10	0.00341006	0.4	2.44333e-05	1	Binomial
GO Cellular Component	GO:0043229	intracellular organelle	2.08679e-08	1.10819	628.955	697	0.739947	0.82	0.00938824	1.05361	714.684	753	10992	0.641944	0.0685044	3.59972e-05	1	Binomial
GO Biological Process	GO:0045087	innate immune response	2.57386e-08	1.82595	50.9325	93	0.0599206	0.109412	0.000440903	1.49384	47.5286	71	731	0.0605286	0.0971272	4.43991e-05	0.760557	Binomial
GO Biological Process	GO:0044237	cellular metabolic process	2.85661e-08	1.15061	510.163	587	0.600192	0.690588	0.0021628	1.08898	535.363	583	8234	0.497016	0.070804	4.92766e-05	1	Binomial
GO Biological Process	GO:0008152	metabolic process	3.44461e-08	1.13346	553.171	627	0.65079	0.737647	0.0115488	1.0637	597.911	636	9196	0.542199	0.0691605	5.94195e-05	1	Binomial
GO Cellular Component	GO:0043226	organelle	3.75837e-08	1.10574	630.349	697	0.741587	0.82	0.00946281	1.05334	716.765	755	11024	0.643649	0.0684869	6.48318e-05	1	Binomial
MSigDB Pathway	KEGG_VALINE_LEUCINE_AND_ISOLEUCINE_BIOSYNTHESIS	Valine, leucine and isoleucine biosynthesis	6.00527e-08	9.15204	1.20192	11	0.00141402	0.0129412	0.030509	4.19461	0.715204	3	11	0.00255755	0.272727	0.000103591	1	Binomial
GO Biological Process	GO:0006955	immune response	6.23984e-08	1.63797	74.4823	122	0.0876263	0.143529	0.00336783	1.31632	72.1706	95	1110	0.0809889	0.0855856	0.000107637	1	Binomial
GO Biological Process	GO:0006448	regulation of translational elongation	6.35392e-08	10.5844	0.944787	10	0.00111151	0.0117647	0.304116	1.80944	1.10532	2	17	0.00170503	0.117647	0.000109605	1	Binomial
GO Cellular Component	GO:0044464	cell part	1.2653e-07	1.05776	757.263	801	0.890897	0.942353	0.0991938	1.01745	962.21	979	14799	0.834612	0.0661531	0.000218264	1	Binomial
GO Cellular Component	GO:0005623	cell	1.38733e-07	1.05752	757.433	801	0.891098	0.942353	0.100079	1.01738	962.275	979	14800	0.834612	0.0661487	0.000239315	1	Binomial
GO Cellular Component	GO:0005737	cytoplasm	1.72456e-07	1.11974	572.452	641	0.673473	0.754118	5.58459e-05	1.10451	614.751	679	9455	0.578858	0.0718139	0.000297487	0.0963341	Binomial
GO Biological Process	GO:0071704	organic substance metabolic process	1.99226e-07	1.13488	526.927	598	0.619915	0.703529	0.00575591	1.07601	556.689	599	8562	0.510656	0.0699603	0.000343666	1	Binomial
GO Cellular Component	GO:0043231	intracellular membrane-bounded organelle	2.2709e-07	1.1118	592.73	659	0.69733	0.775294	0.0469753	1.04306	650.966	679	10012	0.578858	0.0678186	0.000391731	1	Binomial
GO Cellular Component	GO:0043227	membrane-bounded organelle	4.13413e-07	1.10882	594.323	659	0.699204	0.775294	0.048172	1.0426	653.177	681	10046	0.580563	0.0677882	0.000713138	1	Binomial
GO Biological Process	GO:0050878	regulation of body fluid levels	6.10781e-07	1.74312	49.3367	86	0.0580432	0.101177	4.01178e-05	1.6579	39.2062	65	603	0.0554135	0.107794	0.0010536	0.0692032	Binomial
GO Biological Process	GO:0001956	positive regulation of neurotransmitter secretion	6.72465e-07	11.5954	0.689928	8	0.00081168	0.00941177	0.00786971	6.59152	0.45513	3	7	0.00255755	0.428571	0.00116	1	Binomial
GO Biological Process	GO:0006950	response to stress	6.90497e-07	1.30332	206.396	269	0.242819	0.316471	0.00122853	1.19947	192.585	231	2962	0.196931	0.0779878	0.00119111	1	Binomial
GO Biological Process	GO:0043170	macromolecule metabolic process	7.18235e-07	1.15705	447.691	518	0.526696	0.609412	0.0376192	1.06602	440.891	470	6781	0.400682	0.0693113	0.00123896	1	Binomial
GO Biological Process	GO:0006952	defense response	7.27462e-07	1.54499	82.201	127	0.0967071	0.149412	0.00629005	1.2744	80.0379	102	1231	0.0869565	0.0828595	0.00125487	1	Binomial
GO Biological Process	GO:0006139	nucleobase-containing compound metabolic process	9.20216e-07	1.22619	300.116	368	0.353078	0.432941	0.0109719	1.11526	291.413	325	4482	0.277067	0.0725123	0.00158737	1	Binomial
MSigDB Pathway	REACTOME_CYTOSOLIC_TRNA_AMINOACYLATION	Genes involved in Cytosolic tRNA aminoacylation	1.67984e-06	7.35127	1.36031	10	0.00160036	0.0117647	0.468477	1.28168	1.56045	2	24	0.00170503	0.0833333	0.00289772	1	Binomial
GO Molecular Function	GO:0004931	extracellular ATP-gated cation channel activity	1.72341e-06	26.3768	0.189561	5	0.000223013	0.00588235	0.0005308	8.7887	0.45513	4	7	0.00341006	0.571429	0.00297289	0.915629	Binomial
MSigDB Pathway	PID_CERAMIDE_PATHWAY	Ceramide signaling pathway	1.84223e-06	4.29804	3.72263	16	0.00437956	0.0188235	4.21388e-05	3.84505	3.12089	12	48	0.0102302	0.25	0.00317785	0.0726895	Binomial
GO Biological Process	GO:0044238	primary metabolic process	1.94805e-06	1.12717	514.562	580	0.605367	0.682353	0.0079179	1.07467	540.629	581	8315	0.495311	0.0698737	0.00336038	1	Binomial
GO Biological Process	GO:0060155	platelet dense granule organization	1.96127e-06	12.5945	0.5558	7	0.000653882	0.00823529	0.0910495	3.84505	0.520149	2	8	0.00170503	0.25	0.0033832	1	Binomial
GO Biological Process	GO:0048535	lymph node development	2.75957e-06	8.01912	1.12232	9	0.00132037	0.0105882	0.0105134	4.39435	0.91026	4	14	0.00341006	0.285714	0.00476026	1	Binomial
MSigDB Pathway	REACTOME_HEMOSTASIS	Genes involved in Hemostasis	2.83016e-06	1.83039	36.0579	66	0.0424211	0.0776471	4.39626e-05	1.76941	29.3884	52	452	0.0443308	0.115044	0.00488202	0.0758354	Binomial
GO Biological Process	GO:0050776	regulation of immune response	2.83418e-06	1.66436	52.8732	88	0.0622037	0.103529	0.000532762	1.49836	45.383	68	698	0.057971	0.0974212	0.00488897	0.919014	Binomial
GO Biological Process	GO:0043089	positive regulation of Cdc42 GTPase activity	3.38084e-06	11.5825	0.604361	7	0.000711013	0.00823529	0.112172	3.41783	0.585167	2	9	0.00170503	0.222222	0.00583194	1	Binomial
GO Biological Process	GO:0051590	positive regulation of neurotransmitter transport	3.38419e-06	9.30016	0.8602	8	0.001012	0.00941177	0.023294	4.61407	0.650186	3	10	0.00255755	0.3	0.00583773	1	Binomial
GO Biological Process	GO:0060255	regulation of macromolecule metabolic process	4.77493e-06	1.18482	348.576	413	0.41009	0.485882	8.65181e-05	1.18488	301.296	357	4634	0.304348	0.0770393	0.00823675	0.149244	Binomial
GO Biological Process	GO:2000134	negative regulation of G1/S transition of mitotic cell cycle	6.54857e-06	3.38043	5.62059	19	0.00661246	0.0223529	0.00702816	2.14992	6.04673	13	93	0.0110827	0.139785	0.0112963	1	Binomial
MSigDB Pathway	KEGG_AMINOACYL_TRNA_BIOSYNTHESIS	Aminoacyl-tRNA biosynthesis	7.06059e-06	5.06642	2.36854	12	0.00278652	0.0141177	0.275669	1.50051	2.66576	4	41	0.00341006	0.097561	0.0121795	1	Binomial
MSigDB Pathway	ST_INTERLEUKIN_4_PATHWAY	Interleukin 4 (IL-4) Pathway	7.31083e-06	7.09397	1.26868	9	0.00149257	0.0105882	0.0849682	2.36619	1.69048	4	26	0.00341006	0.153846	0.0126112	1	Binomial
GO Molecular Function	GO:0004812	aminoacyl-tRNA ligase activity	7.35476e-06	5.0455	2.37836	12	0.00279807	0.0141177	0.335463	1.36713	2.92584	4	45	0.00341006	0.0888889	0.012687	1	Binomial
MSigDB Pathway	BIOCARTA_P53HYPOXIA_PATHWAY	Hypoxia and p53 in the Cardiovascular system	7.7258e-06	6.16597	1.6218	10	0.00190801	0.0117647	0.0145011	3.34353	1.49543	5	23	0.00426258	0.217391	0.013327	1	Binomial
GO Biological Process	GO:0044260	cellular macromolecule metabolic process	7.96667e-06	1.15203	416.656	480	0.490184	0.564706	0.0323036	1.07385	401.36	431	6173	0.367434	0.0698202	0.0137425	1	Binomial
GO Biological Process	GO:0030225	macrophage differentiation	9.39091e-06	8.0701	0.991313	8	0.00116625	0.00941177	0.0693903	3.07604	0.975279	3	15	0.00255755	0.2	0.0161993	1	Binomial
GO Biological Process	GO:0006725	cellular aromatic compound metabolic process	1.05895e-05	1.19466	313.059	374	0.368305	0.44	0.0202527	1.10023	303.572	334	4669	0.28474	0.0715357	0.0182669	1	Binomial
GO Biological Process	GO:0006954	inflammatory response	1.08002e-05	1.90943	27.2332	52	0.0320391	0.0611765	0.00240584	1.5938	25.0972	40	386	0.0341006	0.103627	0.0186304	1	Binomial
GO Cellular Component	GO:0044446	intracellular organelle part	1.29946e-05	1.15358	402.226	464	0.473208	0.545882	0.06759	1.0576	421.71	446	6486	0.380222	0.0687635	0.0224158	1	Binomial
GO Biological Process	GO:0071375	cellular response to peptide hormone stimulus	1.32401e-05	2.02404	21.7387	44	0.025575	0.0517647	0.00140307	1.77244	17.49	31	269	0.026428	0.115242	0.0228392	1	Binomial
GO Biological Process	GO:0046483	heterocycle metabolic process	1.3385e-05	1.19335	310.889	371	0.365751	0.436471	0.0242987	1.0967	302.726	332	4656	0.283035	0.0713058	0.0230891	1	Binomial
GO Biological Process	GO:0033363	secretory granule organization	1.36726e-05	7.65499	1.04507	8	0.00122949	0.00941177	0.0693903	3.07604	0.975279	3	15	0.00255755	0.2	0.0235853	1	Binomial
GO Biological Process	GO:0008088	axon cargo transport	1.54325e-05	4.32941	3.00272	13	0.00353261	0.0152941	0.26098	1.53802	2.60074	4	40	0.00341006	0.1	0.026621	1	Binomial
MSigDB Pathway	BIOCARTA_RACCYCD_PATHWAY	Influence of Ras and Rho proteins on G1 to S Transition	1.69008e-05	5.62304	1.7784	10	0.00209223	0.0117647	0.00106122	4.14083	1.69048	7	26	0.0059676	0.269231	0.0291538	1	Binomial
MSigDB Pathway	BIOCARTA_G1_PATHWAY	Cell Cycle: G1/S Check Point	1.77077e-05	5.03859	2.18315	11	0.00256841	0.0129412	0.000300061	4.39435	1.82052	8	28	0.00682012	0.285714	0.0305458	0.517605	Binomial
MSigDB Pathway	KEGG_PANCREATIC_CANCER	Pancreatic cancer	1.81237e-05	3.02823	6.60452	20	0.00777002	0.0235294	0.000163207	3.03272	4.61632	14	71	0.0119352	0.197183	0.0312633	0.281533	Binomial
MSigDB Pathway	REACTOME_TRNA_AMINOACYLATION	Genes involved in tRNA Aminoacylation	2.00295e-05	4.55281	2.63573	12	0.00310086	0.0141177	0.290488	1.46478	2.73078	4	42	0.00341006	0.0952381	0.034551	1	Binomial
MSigDB Pathway	KEGG_BLADDER_CANCER	Bladder cancer	2.09852e-05	4.20153	3.09411	13	0.00364013	0.0152941	0.00507186	2.92957	2.73078	8	42	0.00682012	0.190476	0.0361994	1	Binomial
GO Biological Process	GO:0090304	nucleic acid metabolic process	2.11817e-05	1.21668	260.545	317	0.306523	0.372941	0.086198	1.0769	247.006	266	3799	0.226769	0.0700184	0.0365385	1	Binomial
GO Molecular Function	GO:0052689	carboxylic ester hydrolase activity	2.13132e-05	3.22053	5.58915	18	0.00657547	0.0211765	0.130125	1.53802	5.85167	9	90	0.00767263	0.1	0.0367652	1	Binomial
GO Biological Process	GO:0050818	regulation of coagulation	2.26973e-05	3.08509	6.15864	19	0.00724546	0.0223529	0.000588394	2.8161	4.61632	13	71	0.0110827	0.183099	0.0391528	1	Binomial
GO Biological Process	GO:0010467	gene expression	2.46734e-05	1.22753	241.135	296	0.283689	0.348235	0.0508147	1.09827	223.079	245	3431	0.208866	0.0714078	0.0425615	1	Binomial
GO Biological Process	GO:0010970	microtubule-based transport	2.49815e-05	3.18097	5.65864	18	0.00665723	0.0211765	0.0249122	2.02371	4.94141	10	76	0.00852515	0.131579	0.0430931	1	Binomial
GO Biological Process	GO:0030195	negative regulation of blood coagulation	2.56896e-05	5.3491	1.86947	10	0.00219938	0.0117647	0.0271421	2.56337	2.34067	6	36	0.00511509	0.166667	0.0443145	1	Binomial
GO Biological Process	GO:0048011	neurotrophin TRK receptor signaling pathway	3.22251e-05	1.84353	27.6644	51	0.0325463	0.06	2.43775e-05	2.0544	18.0101	37	277	0.0315431	0.133574	0.0555883	0.0420512	Hypergeometric
GO Biological Process	GO:0031399	regulation of protein modification process	3.53095e-05	1.39736	99.4729	139	0.117027	0.163529	1.22233e-06	1.56011	72.4307	113	1114	0.0963342	0.101436	0.0609089	0.00210852	Hypergeometric
GO Biological Process	GO:0009966	regulation of signal transduction	3.7117e-05	1.26777	184.576	234	0.217148	0.275294	2.22827e-08	1.4601	132.183	193	2033	0.164535	0.0949336	0.0640268	3.84377e-05	Hypergeometric
GO Biological Process	GO:0048518	positive regulation of biological process	6.5e-05	1.17333	317.047	372	0.372997	0.437647	7.10402e-09	1.32695	241.154	320	3709	0.272805	0.0862766	0.112125	1.22544e-05	Hypergeometric
MSigDB Pathway	PID_LYSOPHOSPHOLIPID_PATHWAY	LPA receptor mediated events	7.5668e-05	2.81392	6.75214	19	0.00794369	0.0223529	1.66028e-05	3.49551	4.29123	15	66	0.0127877	0.227273	0.130527	0.0286398	Hypergeometric
GO Biological Process	GO:0007169	transmembrane receptor protein tyrosine kinase signaling pathway	0.000126734	1.48573	61.2494	91	0.0720581	0.107059	6.42819e-08	1.93274	36.7355	71	565	0.0605286	0.125664	0.218617	0.000110886	Hypergeometric
GO Biological Process	GO:0043549	regulation of kinase activity	0.000177116	1.4673	62.7	92	0.0737647	0.108235	5.23979e-07	1.76604	44.7328	79	688	0.0673487	0.114826	0.305525	0.000903863	Hypergeometric
GO Biological Process	GO:0010033	response to organic substance	0.000178896	1.25272	171.626	215	0.201913	0.252941	4.01617e-06	1.37029	133.548	183	2054	0.15601	0.0890945	0.308596	0.0069279	Hypergeometric
GO Biological Process	GO:0010942	positive regulation of cell death	0.000193019	1.631	36.7872	60	0.043279	0.0705882	1.76585e-05	1.91214	24.0569	46	370	0.0392157	0.124324	0.332958	0.0304608	Hypergeometric
GO Biological Process	GO:0042325	regulation of phosphorylation	0.00029686	1.36633	88.5585	121	0.104187	0.142353	9.24478e-07	1.62675	60.8574	99	936	0.084399	0.105769	0.512084	0.00159472	Hypergeometric
GO Biological Process	GO:0001932	regulation of protein phosphorylation	0.000297008	1.38444	81.6215	113	0.0960253	0.132941	2.19195e-06	1.62829	56.5011	92	869	0.0784314	0.105869	0.512338	0.00378111	Hypergeometric
GO Biological Process	GO:0051338	regulation of transferase activity	0.000302717	1.44025	64.5722	93	0.0759673	0.109412	9.48395e-07	1.73298	46.1632	80	710	0.0682012	0.112676	0.522187	0.00163598	Hypergeometric
GO Biological Process	GO:0071310	cellular response to organic substance	0.000312182	1.28724	131.289	169	0.154458	0.198823	2.33475e-06	1.45794	97.3978	142	1498	0.121057	0.0947931	0.538514	0.00402744	Hypergeometric
GO Biological Process	GO:0007173	epidermal growth factor receptor signaling pathway	0.000313694	1.84477	20.5987	38	0.0242338	0.0447059	1.85252e-05	2.32305	12.4836	29	192	0.0247229	0.151042	0.541122	0.0319559	Hypergeometric
GO Biological Process	GO:0038127	ERBB signaling pathway	0.000317749	1.84352	20.6128	38	0.0242504	0.0447059	2.04743e-05	2.31102	12.5486	29	193	0.0247229	0.150259	0.548117	0.0353182	Hypergeometric
GO Biological Process	GO:0007167	enzyme linked receptor protein signaling pathway	0.000488451	1.36789	81.8778	112	0.0963268	0.131765	3.72404e-08	1.80348	49.3491	89	759	0.0758738	0.11726	0.842578	6.42396e-05	Hypergeometric
GO Biological Process	GO:0032147	activation of protein kinase activity	0.000545696	1.72005	24.9993	43	0.029411	0.0505882	7.11251e-06	2.22441	15.7345	35	242	0.029838	0.144628	0.941326	0.0122691	Hypergeometric
GO Biological Process	GO:0045859	regulation of protein kinase activity	0.000557069	1.44361	58.1873	84	0.0684557	0.0988235	1.66449e-06	1.75098	42.2621	74	650	0.0630861	0.113846	0.960944	0.00287125	Hypergeometric
GO Biological Process	GO:0010604	positive regulation of macromolecule metabolic process	0.000579323	1.21598	188.326	229	0.22156	0.269412	6.49145e-07	1.4094	129.842	183	1997	0.15601	0.0916375	0.999331	0.00111977	Hypergeometric
GO Biological Process	GO:0031325	positive regulation of cellular metabolic process	0.000642109	1.21303	189.608	230	0.223068	0.270588	5.74145e-06	1.36529	132.573	181	2039	0.154305	0.088769	1	0.009904	Hypergeometric
GO Biological Process	GO:0033674	positive regulation of kinase activity	0.000654942	1.5162	43.5298	66	0.0512115	0.0776471	1.63621e-06	1.91832	29.7135	57	457	0.0485934	0.124727	1	0.00282245	Hypergeometric
GO Biological Process	GO:0048522	positive regulation of cellular process	0.000708955	1.15537	289.951	335	0.341119	0.394118	2.56681e-07	1.31113	215.081	282	3308	0.240409	0.0852479	1	0.000442775	Hypergeometric
GO Biological Process	GO:0009893	positive regulation of metabolic process	0.000741786	1.2025	200.415	241	0.235783	0.283529	8.99814e-07	1.38586	139.985	194	2153	0.165388	0.0901068	1	0.00155218	Hypergeometric
GO Biological Process	GO:0051347	positive regulation of transferase activity	0.00086846	1.49397	44.8469	67	0.0527611	0.0788235	1.74724e-06	1.90203	30.4937	58	469	0.0494459	0.123667	1	0.00301399	Hypergeometric
GO Biological Process	GO:0043410	positive regulation of MAPK cascade	0.000972894	1.52658	39.3036	60	0.0462395	0.0705882	7.07364e-07	2.13236	22.0413	47	339	0.0400682	0.138643	1	0.0012202	Hypergeometric
GO Biological Process	GO:0045860	positive regulation of protein kinase activity	0.00140497	1.49094	41.5844	62	0.0489228	0.0729412	1.51835e-06	1.94911	28.2181	55	434	0.0468883	0.126728	1	0.00261916	Hypergeometric
GO Biological Process	GO:0001934	positive regulation of protein phosphorylation	0.00162991	1.40016	57.8506	81	0.0680595	0.0952941	1.09838e-05	1.71175	39.1412	67	602	0.0571185	0.111296	1	0.0189471	Hypergeometric
GO Biological Process	GO:0010646	regulation of cell communication	0.00265467	1.17193	209.911	246	0.246954	0.289412	9.8265e-08	1.40677	148.567	209	2285	0.178176	0.0914661	1	0.000169507	Hypergeometric
GO Biological Process	GO:0071495	cellular response to endogenous stimulus	0.0027404	1.31264	79.9913	105	0.0941074	0.123529	1.2601e-06	1.68282	51.1046	86	786	0.0733163	0.109415	1	0.00217367	Hypergeometric
GO Biological Process	GO:0042327	positive regulation of phosphorylation	0.0027812	1.36892	59.901	82	0.0704718	0.0964706	1.3061e-05	1.69507	40.1165	68	617	0.057971	0.110211	1	0.0225302	Hypergeometric
GO Biological Process	GO:0023051	regulation of signaling	0.00437833	1.16155	210.064	244	0.247134	0.287059	2.15274e-07	1.39514	148.372	207	2282	0.176471	0.0907099	1	0.000371347	Hypergeometric
GO Biological Process	GO:0071363	cellular response to growth factor stimulus	0.00579175	1.34071	58.1782	78	0.068445	0.0917647	5.52821e-06	1.79243	34.5899	62	532	0.0528559	0.116541	1	0.00953616	Hypergeometric
GO Biological Process	GO:0051174	regulation of phosphorus metabolic process	0.00695482	1.19794	139.406	167	0.164007	0.196471	2.30763e-06	1.46528	94.8621	139	1459	0.1185	0.0952707	1	0.00398065	Hypergeometric
GO Biological Process	GO:0019220	regulation of phosphate metabolic process	0.00738282	1.19682	138.701	166	0.163178	0.195294	2.29639e-06	1.46782	94.0169	138	1446	0.117647	0.0954357	1	0.00396128	Hypergeometric
GO Biological Process	GO:0043408	regulation of MAPK cascade	0.00751632	1.34043	54.4603	73	0.0640709	0.0858823	1.83902e-06	1.87564	31.9891	60	492	0.0511509	0.121951	1	0.0031723	Hypergeometric
GO Biological Process	GO:0043085	positive regulation of catalytic activity	0.00839585	1.23353	101.335	125	0.119218	0.147059	1.74283e-05	1.48841	72.5607	108	1116	0.0920716	0.0967742	1	0.0300639	Hypergeometric
GO Biological Process	GO:0006418	tRNA aminoacylation for protein translation	2.99715e-05	4.36534	2.74892	12	0.00323403	0.0141177	0.395717	1.25553	3.18591	4	49	0.00341006	0.0816327	0.0517008	1	Not associated
GO Biological Process	GO:0034641	cellular nitrogen compound metabolic process	3.01353e-05	1.18018	320.289	378	0.376811	0.444706	0.0370761	1.08503	316.12	343	4862	0.292413	0.0705471	0.0519833	1	Not associated
GO Biological Process	GO:0032928	regulation of superoxide anion generation	3.03479e-05	10.4321	0.575148	6	0.000676644	0.00705882	0.000220319	7.69011	0.650186	5	10	0.00426258	0.5	0.0523502	0.38005	Not associated
GO Biological Process	GO:0048537	mucosal-associated lymphoid tissue development	3.15999e-05	6.79554	1.17724	8	0.00138499	0.00941177	0.0387552	3.84505	0.780223	3	12	0.00255755	0.25	0.0545098	1	Not associated
GO Biological Process	GO:0006807	nitrogen compound metabolic process	3.18203e-05	1.16565	351.734	410	0.413805	0.482353	0.022423	1.09005	343.103	374	5277	0.318841	0.0708736	0.0548899	1	Not associated
GO Cellular Component	GO:0044422	organelle part	3.2138e-05	1.14349	409.274	468	0.481499	0.550588	0.0794456	1.05363	428.993	452	6598	0.385337	0.0685056	0.055438	1	Not associated
GO Biological Process	GO:0060159	regulation of dopamine receptor signaling pathway	3.66649e-05	10.08	0.595239	6	0.000700281	0.00705882	0.331975	2.56337	0.390111	1	6	0.000852515	0.166667	0.063247	1	Not associated
GO Biological Process	GO:0016070	RNA metabolic process	3.84329e-05	1.23051	228.36	281	0.268659	0.330588	0.0143553	1.13766	206.564	235	3177	0.200341	0.0739691	0.0662967	1	Not associated
MSigDB Pathway	KEGG_ENDOCYTOSIS	Endocytosis	3.97368e-05	2.2439	13.8152	31	0.0162532	0.0364706	0.00157076	1.95439	11.7684	23	181	0.0196078	0.127072	0.068546	1	Not associated
GO Cellular Component	GO:0031519	PcG protein complex	4.00565e-05	3.94156	3.29819	13	0.00388022	0.0152941	0.00314147	3.15492	2.53572	8	39	0.00682012	0.205128	0.0690974	1	Not associated
GO Biological Process	GO:0030705	cytoskeleton-dependent intracellular transport	4.18776e-05	3.05433	5.89328	18	0.00693327	0.0211765	0.0367525	1.89879	5.2665	10	81	0.00852515	0.123457	0.0722388	1	Not associated
GO Biological Process	GO:0002366	leukocyte activation involved in immune response	4.31608e-05	2.75758	7.61539	21	0.00895928	0.0247059	0.00155713	2.44685	5.72163	14	88	0.0119352	0.159091	0.0744523	1	Not associated
GO Biological Process	GO:0043088	regulation of Cdc42 GTPase activity	4.57211e-05	6.44375	1.24151	8	0.0014606	0.00941177	0.107923	2.56337	1.17033	3	18	0.00255755	0.166667	0.0788689	1	Not associated
GO Biological Process	GO:0080090	regulation of primary metabolic process	4.86937e-05	1.15385	370.932	428	0.43639	0.503529	8.4919e-05	1.17733	320.216	377	4925	0.321398	0.0765482	0.0839966	0.146485	Not associated
GO Biological Process	GO:0031331	positive regulation of cellular catabolic process	4.91838e-05	2.47197	10.1134	25	0.0118981	0.0294118	0.00952434	1.95511	7.67219	15	118	0.0127877	0.127119	0.0848421	1	Not associated
GO Biological Process	GO:0002252	immune effector process	5.05398e-05	1.89394	23.76	45	0.0279529	0.0529412	0.0987404	1.26847	25.2272	32	388	0.0272805	0.0824742	0.0871811	1	Not associated
GO Biological Process	GO:0050819	negative regulation of coagulation	5.15634e-05	4.47035	2.46066	11	0.00289489	0.0129412	0.0136084	2.69154	2.60074	7	40	0.0059676	0.175	0.0889469	1	Not associated
GO Biological Process	GO:0030193	regulation of blood coagulation	5.51971e-05	3.10674	5.47197	17	0.00643761	0.02	0.00292453	2.60281	4.22621	11	65	0.00937766	0.169231	0.095215	1	Not associated
GO Biological Process	GO:2000045	regulation of G1/S transition of mitotic cell cycle	5.7723e-05	2.62741	8.37326	22	0.00985089	0.0258823	0.004046	2.08545	7.67219	16	118	0.0136402	0.135593	0.0995722	1	Not associated
GO Cellular Component	GO:0000407	pre-autophagosomal structure	5.97945e-05	7.36421	0.950543	7	0.00111828	0.00823529	0.00483704	4.27228	1.17033	5	18	0.00426258	0.277778	0.103145	1	Not associated
GO Biological Process	GO:0032922	circadian regulation of gene expression	6.2014e-05	6.16522	1.2976	8	0.00152659	0.00941177	0.229975	2.19718	0.91026	2	14	0.00170503	0.142857	0.106974	1	Not associated
MSigDB Pathway	BIOCARTA_CELLCYCLE_PATHWAY	Cyclins and Cell Cycle Regulation	7.6526e-05	5.22858	1.72131	9	0.00202507	0.0105882	0.000469592	4.68094	1.49543	7	23	0.0059676	0.304348	0.132007	0.810047	Not associated
GO Biological Process	GO:0065007	biological regulation	8.15623e-05	1.08074	607.918	657	0.715198	0.772941	3.01967e-05	1.1036	640.628	707	9853	0.602728	0.0717548	0.140695	0.0520894	Not associated
GO Biological Process	GO:0002682	regulation of immune system process	8.20247e-05	1.41111	85.7479	121	0.10088	0.142353	0.00028801	1.41394	69.3098	98	1066	0.0835465	0.0919325	0.141493	0.496817	Not associated
GO Biological Process	GO:0030853	negative regulation of granulocyte differentiation	8.2912e-05	8.68071	0.691188	6	0.000813162	0.00705882	0.0712839	4.39435	0.45513	2	7	0.00170503	0.285714	0.143023	1	Not associated
GO Biological Process	GO:0090200	positive regulation of release of cytochrome c from mitochondria	8.78523e-05	5.85937	1.36533	8	0.00160628	0.00941177	0.000469592	4.68094	1.49543	7	23	0.0059676	0.304348	0.151545	0.810047	Not associated
GO Biological Process	GO:0007051	spindle organization	8.80353e-05	3.26072	4.60021	15	0.00541201	0.0176471	0.0747103	1.73028	5.20149	9	80	0.00767263	0.1125	0.151861	1	Not associated
GO Biological Process	GO:0051225	spindle assembly	9.78572e-05	4.54443	2.2005	10	0.00258882	0.0117647	0.155412	1.74775	2.86082	5	44	0.00426258	0.113636	0.168804	1	Not associated
GO Molecular Function	GO:0046961	proton-transporting ATPase activity, rotational mechanism	9.87059e-05	8.40537	0.713829	6	0.000839799	0.00705882	0.00368844	4.5236	1.10532	5	17	0.00426258	0.294118	0.170268	1	Not associated
GO Biological Process	GO:0050789	regulation of biological process	9.93922e-05	1.08443	588.326	638	0.692148	0.750588	0.000226486	1.09635	606.558	665	9329	0.566922	0.0712831	0.171452	0.390688	Not associated
GO Biological Process	GO:0038179	neurotrophin signaling pathway	9.95635e-05	1.76072	28.9655	51	0.034077	0.06	3.09151e-05	2.03239	18.2052	37	280	0.0315431	0.132143	0.171747	0.0533285	Not associated
GO Biological Process	GO:0007010	cytoskeleton organization	0.000104858	1.49799	60.0806	90	0.0706831	0.105882	0.000724329	1.48138	45.9031	68	706	0.057971	0.0963173	0.180881	1	Not associated
GO Cellular Component	GO:0031083	BLOC-1 complex	0.000105487	8.30251	0.722673	6	0.000850203	0.00705882	0.635356	1.02535	0.975279	1	15	0.000852515	0.0666667	0.181966	1	Not associated
MSigDB Pathway	PID_BETACATENIN_DEG_PATHWAY	Degradation of beta catenin	0.000107815	4.99367	1.80228	9	0.00212033	0.0105882	0.0942905	2.71416	1.10532	3	17	0.00255755	0.176471	0.185981	1	Not associated
MSigDB Pathway	KEGG_GLIOMA	Glioma	0.000108591	2.93455	5.79305	17	0.00681535	0.02	0.00330776	2.56337	4.29123	11	66	0.00937766	0.166667	0.18732	1	Not associated
GO Biological Process	GO:0046486	glycerolipid metabolic process	0.000110171	1.92794	20.2288	39	0.0237986	0.0458824	0.0398115	1.42703	18.9204	27	291	0.0230179	0.0927835	0.190044	1	Not associated
GO Cellular Component	GO:0031094	platelet dense tubular network	0.000113616	8.18893	0.732697	6	0.000861996	0.00705882	0.030509	4.19461	0.715204	3	11	0.00255755	0.272727	0.195987	1	Not associated
GO Cellular Component	GO:0031082	BLOC complex	0.000114037	6.62946	1.05589	7	0.00124223	0.00823529	0.376883	1.53802	1.30037	2	20	0.00170503	0.1	0.196715	1	Not associated
GO Biological Process	GO:0048194	Golgi vesicle budding	0.000114647	8.1752	0.733927	6	0.000863443	0.00705882	0.017231	3.84505	1.0403	4	16	0.00341006	0.25	0.197765	1	Not associated
GO Molecular Function	GO:0008320	protein transmembrane transporter activity	0.000115994	8.15748	0.735522	6	0.000865319	0.00705882	0.0136106	4.10139	0.975279	4	15	0.00341006	0.266667	0.200089	1	Not associated
GO Cellular Component	GO:0012505	endomembrane system	0.000116905	1.31339	128.674	169	0.151382	0.198823	0.00613431	1.23341	107.021	132	1646	0.112532	0.0801944	0.20166	1	Not associated
MSigDB Pathway	REACTOME_INTERFERON_ALPHA_BETA_SIGNALING	Genes involved in Interferon alpha/beta signaling	0.000117782	4.4408	2.25185	10	0.00264923	0.0117647	0.224796	1.46478	4.09617	6	63	0.00511509	0.0952381	0.203174	1	Not associated
GO Biological Process	GO:0015991	ATP hydrolysis coupled proton transport	0.000117903	5.61092	1.42579	8	0.0016774	0.00941177	0.00212199	3.71247	1.88554	7	29	0.0059676	0.241379	0.203384	1	Not associated
GO Biological Process	GO:0010638	positive regulation of organelle organization	0.000118045	1.92134	20.2983	39	0.0238804	0.0458824	0.0070038	1.65445	16.3197	27	251	0.0230179	0.10757	0.203628	1	Not associated
MSigDB Pathway	REACTOME_BMAL1_CLOCK_NPAS2_ACTIVATES_CIRCADIAN_EXPRESSION	Genes involved in BMAL1:CLOCK/NPAS2 Activates Circadian Expression	0.000127431	3.15056	4.76105	15	0.00560124	0.0176471	6.95118e-05	4.27228	2.34067	10	36	0.00852515	0.277778	0.219818	0.119908	Not associated
GO Biological Process	GO:0043039	tRNA aminoacylation	0.000127525	3.73826	3.21005	12	0.00377653	0.0141177	0.440357	1.18309	3.38097	4	52	0.00341006	0.0769231	0.219981	1	Not associated
MSigDB Pathway	REACTOME_SIGNALING_BY_FGFR_IN_DISEASE	Genes involved in Signaling by FGFR in disease	0.000128923	2.27713	11.4179	26	0.0134328	0.0305882	0.00231858	2.14315	7.93227	17	122	0.0144928	0.139344	0.222393	1	Not associated
GO Biological Process	GO:0048490	anterograde synaptic vesicle transport	0.000134623	7.93448	0.756193	6	0.000889639	0.00705882	0.659084	0.961264	1.0403	1	16	0.000852515	0.0625	0.232225	1	Not associated
GO Cellular Component	GO:0000932	cytoplasmic mRNA processing body	0.00013643	3.71069	3.2339	12	0.00380459	0.0141177	0.000969304	2.96811	3.70606	11	57	0.00937766	0.192983	0.235342	1	Not associated
GO Biological Process	GO:0016050	vesicle organization	0.000137065	2.47061	8.90469	22	0.0104761	0.0258823	0.0110031	1.97544	7.08702	14	109	0.0119352	0.12844	0.236437	1	Not associated
GO Biological Process	GO:0048536	spleen development	0.000137659	3.28705	4.25914	14	0.00501075	0.0164706	0.309355	1.53802	1.95056	3	30	0.00255755	0.1	0.237461	1	Not associated
GO Biological Process	GO:0006414	translational elongation	0.000138298	3.1265	4.79769	15	0.00564435	0.0176471	0.751314	0.816649	7.3471	6	113	0.00511509	0.0530974	0.238564	1	Not associated
GO Biological Process	GO:0035791	platelet-derived growth factor receptor-beta signaling pathway	0.000142686	10.3948	0.48101	5	0.000565894	0.00588235	0.00472446	7.69011	0.390111	3	6	0.00255755	0.5	0.246134	1	Not associated
GO Biological Process	GO:0061041	regulation of wound healing	0.000143323	2.46263	8.93355	22	0.01051	0.0258823	0.000654472	2.56337	5.85167	15	90	0.0127877	0.166667	0.247233	1	Not associated
GO Cellular Component	GO:0031090	organelle membrane	0.000145223	1.24761	181.146	226	0.213113	0.265882	0.0242436	1.14127	167.358	191	2574	0.16283	0.0742036	0.250511	1	Not associated
GO Cellular Component	GO:0044429	mitochondrial part	0.000146963	1.56163	46.7461	73	0.0549954	0.0858823	0.189467	1.12491	51.5597	58	793	0.0494459	0.07314	0.253512	1	Not associated
GO Biological Process	GO:0032489	regulation of Cdc42 protein signal transduction	0.000147088	5.42991	1.47332	8	0.00173332	0.00941177	0.168915	2.0973	1.43041	3	22	0.00255755	0.136364	0.253727	1	Not associated
MSigDB Pathway	PID_HEDGEHOG_GLIPATHWAY	Hedgehog signaling events mediated by Gli proteins	0.000150854	3.25752	4.29775	14	0.00505618	0.0164706	0.0101487	2.61791	3.05587	8	47	0.00682012	0.170213	0.260223	1	Not associated
GO Cellular Component	GO:0015629	actin cytoskeleton	0.000154769	1.69761	31.8094	54	0.0374228	0.0635294	0.00750645	1.49957	26.0074	39	400	0.0332481	0.0975	0.266977	1	Not associated
GO Molecular Function	GO:1901363	heterocyclic compound binding	0.00015635	1.14511	363.284	416	0.427393	0.489412	0.161578	1.04469	344.598	360	5300	0.306905	0.0679245	0.269703	1	Not associated
MSigDB Pathway	ST_B_CELL_ANTIGEN_RECEPTOR	B Cell Antigen Receptor	0.000157502	3.92978	2.79914	11	0.00329311	0.0129412	0.0136084	2.69154	2.60074	7	40	0.0059676	0.175	0.271692	1	Not associated
GO Biological Process	GO:0050872	white fat cell differentiation	0.000167659	5.32504	1.50234	8	0.00176745	0.00941177	0.18122	2.56337	0.780223	2	12	0.00170503	0.166667	0.289211	1	Not associated
GO Biological Process	GO:0048584	positive regulation of response to stimulus	0.000170429	1.32464	116.258	154	0.136775	0.181176	3.54837e-05	1.43581	82.1835	118	1264	0.100597	0.0933544	0.29399	0.0612094	Not associated
GO Biological Process	GO:1901360	organic cyclic compound metabolic process	0.000170908	1.15876	325.347	377	0.382762	0.443529	0.070376	1.07004	317.746	340	4887	0.289855	0.0695723	0.294817	1	Not associated
GO Biological Process	GO:0001775	cell activation	0.000174612	1.53156	50.2754	77	0.0591475	0.0905882	0.000125334	1.63041	36.8005	60	566	0.0511509	0.106007	0.301207	0.216201	Not associated
GO Molecular Function	GO:0022884	macromolecule transmembrane transporter activity	0.00018557	7.47214	0.802983	6	0.000944686	0.00705882	0.021398	3.61888	1.10532	4	17	0.00341006	0.235294	0.320109	1	Not associated
GO Biological Process	GO:0030852	regulation of granulocyte differentiation	0.000185718	5.24423	1.52549	8	0.00179469	0.00941177	0.0693903	3.07604	0.975279	3	15	0.00255755	0.2	0.320363	1	Not associated
GO Biological Process	GO:0048193	Golgi vesicle transport	0.000187114	2.18371	12.3643	27	0.0145462	0.0317647	0.0748578	1.46069	11.6383	17	179	0.0144928	0.0949721	0.322771	1	Not associated
GO Biological Process	GO:0032862	activation of Rho GTPase activity	0.000191656	4.61818	1.94882	9	0.00229273	0.0105882	0.0508998	2.7964	1.43041	4	22	0.00341006	0.181818	0.330607	1	Not associated
MSigDB Pathway	REACTOME_IMMUNE_SYSTEM	Genes involved in Immune System	0.000192785	1.4785	59.5196	88	0.0700231	0.103529	0.170626	1.12538	58.6467	66	902	0.056266	0.0731707	0.332554	1	Not associated
GO Biological Process	GO:0043434	response to peptide hormone stimulus	0.000200987	1.73057	28.3143	49	0.0333109	0.0576471	0.00783301	1.53364	22.8215	35	351	0.029838	0.0997151	0.346703	1	Not associated
GO Biological Process	GO:0048541	Peyer's patch development	0.000206675	6.00909	1.1649	7	0.00137047	0.00823529	0.157476	2.7964	0.715204	2	11	0.00170503	0.181818	0.356515	1	Not associated
GO Cellular Component	GO:0005634	nucleus	0.000211581	1.12801	405.137	457	0.476631	0.537647	0.105779	1.05084	394.923	415	6074	0.353794	0.068324	0.364977	1	Not associated
MSigDB Pathway	REACTOME_SIGNALING_BY_EGFR_IN_CANCER	Genes involved in Signaling by EGFR in Cancer	0.000215036	2.33687	9.84221	23	0.0115791	0.0270588	0.000418134	2.49013	6.82695	17	105	0.0144928	0.161905	0.370938	0.721281	Not associated
GO Molecular Function	GO:0097159	organic cyclic compound binding	0.000219362	1.14006	367.523	419	0.43238	0.492941	0.174847	1.04195	349.345	364	5373	0.310315	0.0677461	0.3784	1	Not associated
GO Biological Process	GO:1901652	response to peptide	0.000228815	1.70978	29.2435	50	0.0344041	0.0588235	0.00676889	1.53802	23.4067	36	360	0.0306905	0.1	0.394706	1	Not associated
MSigDB Pathway	SA_G1_AND_S_PHASES	Cdk2, 4, and 6 bind cyclin D in G1, while cdk2/cyclin E promotes the G1/S transition.	0.000231977	9.34931	0.534799	5	0.000629175	0.00588235	0.0693903	3.07604	0.975279	3	15	0.00255755	0.2	0.40016	1	Not associated
GO Biological Process	GO:0006986	response to unfolded protein	0.000235252	2.49804	8.00629	20	0.00941917	0.0235294	0.00140156	2.13302	8.90754	19	137	0.0161978	0.138686	0.40581	1	Not associated
MSigDB Pathway	BIOCARTA_IL2_PATHWAY	IL 2 signaling pathway	0.000240069	5.86078	1.19438	7	0.00140515	0.00823529	0.0119758	3.49551	1.43041	5	22	0.00426258	0.227273	0.414119	1	Not associated
GO Biological Process	GO:0032270	positive regulation of cellular protein metabolic process	0.000241533	1.40494	76.8716	108	0.0904372	0.127059	0.000178019	1.48158	56.6962	84	872	0.0716113	0.0963303	0.416644	0.307083	Not associated
GO Molecular Function	GO:0044769	ATPase activity, coupled to transmembrane movement of ions, rotational mechanism	0.000242087	7.1072	0.844214	6	0.000993193	0.00705882	0.00621812	4.04743	1.23535	5	19	0.00426258	0.263158	0.417599	1	Not associated
GO Molecular Function	GO:0050321	tau-protein kinase activity	0.000246495	9.22566	0.541967	5	0.000637608	0.00588235	0.553804	1.28168	0.780223	1	12	0.000852515	0.0833333	0.425205	1	Not associated
GO Biological Process	GO:0060337	type I interferon-mediated signaling pathway	0.000247746	4.04273	2.47358	10	0.00291009	0.0117647	0.235563	1.4419	4.16119	6	64	0.00511509	0.09375	0.427361	1	Not associated
MSigDB Pathway	PID_P53DOWNSTREAMPATHWAY	Direct p53 effectors	0.000248159	2.22142	11.254	25	0.0132401	0.0294118	0.0163603	1.79623	8.90754	16	137	0.0136402	0.116788	0.428074	1	Not associated
GO Biological Process	GO:0071357	cellular response to type I interferon	0.000249145	4.03982	2.47536	10	0.00291219	0.0117647	0.246485	1.41971	4.22621	6	65	0.00511509	0.0923077	0.429775	1	Not associated
GO Molecular Function	GO:0008028	monocarboxylic acid transmembrane transporter activity	0.000252014	4.03391	2.47899	10	0.00291645	0.0117647	0.0371474	2.65176	1.88554	5	29	0.00426258	0.172414	0.434723	1	Not associated
GO Biological Process	GO:0045815	positive regulation of gene expression, epigenetic	0.000253943	5.80594	1.20566	7	0.00141843	0.00823529	0.0582344	3.29576	0.91026	3	14	0.00255755	0.214286	0.438051	1	Not associated
GO Biological Process	GO:0048872	homeostasis of number of cells	0.000254123	2.0178	15.3633	31	0.0180744	0.0364706	0.00907324	1.80385	10.533	19	162	0.0161978	0.117284	0.438361	1	Not associated
GO Biological Process	GO:0031401	positive regulation of protein modification process	0.000260122	1.42157	71.0481	101	0.083586	0.118823	2.90146e-05	1.58151	50.5844	80	778	0.0682012	0.102828	0.44871	0.0500501	Not associated
MSigDB Pathway	REACTOME_DOWNREGULATION_OF_SMAD2_3_SMAD4_TRANSCRIPTIONAL_ACTIVITY	Genes involved in Downregulation of SMAD2/3:SMAD4 transcriptional activity	0.000269691	4.40582	2.04275	9	0.00240324	0.0105882	0.000970032	4.85691	1.23535	6	19	0.00511509	0.31579	0.465218	1	Not associated
GO Cellular Component	GO:0033176	proton-transporting V-type ATPase complex	0.000270179	5.74594	1.21825	7	0.00143324	0.00823529	0.00363803	3.84505	1.56045	6	24	0.00511509	0.25	0.466059	1	Not associated
GO Biological Process	GO:0034340	response to type I interferon	0.000273718	3.99143	2.50537	10	0.00294749	0.0117647	0.257548	1.3982	4.29123	6	66	0.00511509	0.0909091	0.472163	1	Not associated
GO Biological Process	GO:0006818	hydrogen transport	0.000281298	3.66844	2.99855	11	0.0035277	0.0129412	0.0313338	2.03562	4.42126	9	68	0.00767263	0.132353	0.485239	1	Not associated
GO Biological Process	GO:0002312	B cell activation involved in immune response	0.000293315	3.95613	2.52772	10	0.00297379	0.0117647	0.0324198	2.74647	1.82052	5	28	0.00426258	0.178571	0.505969	1	Not associated
GO Biological Process	GO:0035966	response to topologically incorrect protein	0.000300118	2.45023	8.16251	20	0.00960296	0.0235294	0.00272188	2.01534	9.42769	19	145	0.0161978	0.131034	0.517703	1	Not associated
MSigDB Pathway	REACTOME_ORC1_REMOVAL_FROM_CHROMATIN	Genes involved in Orc1 removal from chromatin	0.000307317	3.93245	2.54294	10	0.0029917	0.0117647	0.0287837	2.066	4.35624	9	67	0.00767263	0.134328	0.530121	1	Not associated
GO Biological Process	GO:0032988	ribonucleoprotein complex disassembly	0.0003198	12.6729	0.315635	4	0.000371335	0.00470588	0.331975	2.56337	0.390111	1	6	0.000852515	0.166667	0.551654	1	Not associated
GO Cellular Component	GO:0016469	proton-transporting two-sector ATPase complex	0.000331386	4.28139	2.10212	9	0.00247308	0.0105882	0.0146037	2.46083	3.25093	8	50	0.00682012	0.16	0.571641	1	Not associated
GO Molecular Function	GO:0036442	hydrogen-exporting ATPase activity	0.000354934	6.60914	0.907833	6	0.00106804	0.00705882	0.00976654	3.66196	1.36539	5	21	0.00426258	0.238095	0.612261	1	Not associated
MSigDB Pathway	PID_P53REGULATIONPATHWAY	p53 pathway	0.000355036	3.1459	4.13236	13	0.0048616	0.0152941	0.0869712	1.82477	3.8361	7	59	0.0059676	0.118644	0.612437	1	Not associated
MSigDB Pathway	REACTOME_G1_PHASE	Genes involved in G1 Phase	0.00035697	3.85708	2.59263	10	0.00305016	0.0117647	0.00183701	3.41783	2.34067	8	36	0.00682012	0.222222	0.615774	1	Not associated
GO Biological Process	GO:0031958	corticosteroid receptor signaling pathway	0.000360114	6.59089	0.910347	6	0.001071	0.00705882	0.030509	4.19461	0.715204	3	11	0.00255755	0.272727	0.621197	1	Not associated
GO Biological Process	GO:0097191	extrinsic apoptotic signaling pathway	0.000362735	3.32663	3.60726	12	0.00424383	0.0141177	0.0249397	2.23712	3.57602	8	55	0.00682012	0.145454	0.625718	1	Not associated
GO Cellular Component	GO:0032991	macromolecular complex	0.000371815	1.16666	284.572	332	0.334791	0.390588	0.359132	1.02001	274.508	280	4222	0.238704	0.0663193	0.641381	1	Not associated
GO Biological Process	GO:0090199	regulation of release of cytochrome c from mitochondria	0.000376862	3.83005	2.61093	10	0.00307168	0.0117647	0.00123733	3.61888	2.21063	8	34	0.00682012	0.235294	0.650087	1	Not associated
GO Cellular Component	GO:0005773	vacuole	0.000383625	1.64256	32.2666	53	0.0379608	0.0623529	0.0407128	1.31831	31.8591	42	490	0.0358056	0.0857143	0.661753	1	Not associated
MSigDB Pathway	PID_CIRCADIANPATHWAY	Circadian rhythm pathway	0.00038842	5.40471	1.29517	7	0.00152373	0.00823529	0.0814271	2.88379	1.0403	3	16	0.00255755	0.1875	0.670025	1	Not associated
MSigDB Pathway	REACTOME_SIGNALING_BY_FGFR	Genes involved in Signaling by FGFR	0.000397932	2.23454	10.293	23	0.0121094	0.0270588	0.00162219	2.27855	7.02201	16	108	0.0136402	0.148148	0.686433	1	Not associated
GO Biological Process	GO:0010544	negative regulation of platelet activation	0.000407253	8.25809	0.605467	5	0.000712314	0.00588235	0.0171214	5.12674	0.585167	3	9	0.00255755	0.333333	0.702511	1	Not associated
MSigDB Pathway	REACTOME_P75_NTR_RECEPTOR_MEDIATED_SIGNALLING	Genes involved in p75 NTR receptor-mediated signalling	0.00040916	2.52917	7.11696	18	0.00837289	0.0211765	0.0016514	2.53092	5.13647	13	79	0.0110827	0.164557	0.705802	1	Not associated
GO Biological Process	GO:0032869	cellular response to insulin stimulus	0.000412611	1.95956	15.8198	31	0.0186116	0.0364706	0.0142419	1.6735	12.5486	21	193	0.0179028	0.108808	0.711754	1	Not associated
MSigDB Pathway	REACTOME_FACTORS_INVOLVED_IN_MEGAKARYOCYTE_DEVELOPMENT_AND_PLATELET_PRODUCTION	Genes involved in Factors involved in megakaryocyte development and platelet production	0.000422802	2.38359	8.39069	20	0.0098714	0.0235294	0.019126	1.80237	8.32238	15	128	0.0127877	0.117188	0.729334	1	Not associated
GO Biological Process	GO:0001935	endothelial cell proliferation	0.000423595	4.13656	2.17572	9	0.00255967	0.0105882	0.021398	3.61888	1.10532	4	17	0.00341006	0.235294	0.730702	1	Not associated
GO Biological Process	GO:0048096	chromatin-mediated maintenance of transcription	0.00043131	8.1535	0.613234	5	0.000721451	0.00588235	0.0531656	5.12674	0.390111	2	6	0.00170503	0.333333	0.744009	1	Not associated
GO Biological Process	GO:0019509	L-methionine salvage from methylthioadenosine	0.000437747	11.6527	0.343269	4	0.000403846	0.00470588	0.0531656	5.12674	0.390111	2	6	0.00170503	0.333333	0.755113	1	Not associated
GO Biological Process	GO:0006595	polyamine metabolic process	0.00045224	6.30954	0.950941	6	0.00111875	0.00705882	0.0373358	3.07604	1.30037	4	20	0.00341006	0.2	0.780113	1	Not associated
MSigDB Pathway	REACTOME_SIGNALLING_BY_NGF	Genes involved in Signalling by NGF	0.000454874	1.82512	20.2727	37	0.0238502	0.0435294	0.00067214	1.94961	13.849	27	213	0.0230179	0.126761	0.784659	1	Not associated
MSigDB Pathway	REACTOME_PLATELET_ACTIVATION_SIGNALING_AND_AGGREGATION	Genes involved in Platelet activation, signaling and aggregation	0.000458832	1.92324	16.6386	32	0.0195748	0.0376471	0.00110435	1.94195	12.8737	25	198	0.0213129	0.126263	0.791485	1	Not associated
GO Biological Process	GO:0051017	actin filament bundle assembly	0.000469582	3.44774	3.19049	11	0.00375352	0.0129412	0.00151379	3.51548	2.27565	8	35	0.00682012	0.228571	0.810029	1	Not associated
GO Biological Process	GO:0031058	positive regulation of histone modification	0.000470517	3.22904	3.71628	12	0.00437209	0.0141177	0.144993	1.7884	2.7958	5	43	0.00426258	0.116279	0.811642	1	Not associated
GO Cellular Component	GO:0035770	ribonucleoprotein granule	0.000474539	2.77689	5.40174	15	0.00635498	0.0176471	0.00324569	2.26656	6.17676	14	95	0.0119352	0.147368	0.81858	1	Not associated
GO Cellular Component	GO:0031967	organelle envelope	0.000481901	1.45067	57.9042	84	0.0681226	0.0988235	0.0761218	1.1913	56.2411	67	865	0.0571185	0.0774567	0.83128	1	Not associated
GO Cellular Component	GO:0001931	uropod	0.000481915	7.95465	0.628563	5	0.000739486	0.00588235	0.00100693	7.69011	0.520149	4	8	0.00341006	0.5	0.831304	1	Not associated
GO Biological Process	GO:0043457	regulation of cellular respiration	0.000490613	6.21146	0.965957	6	0.00113642	0.00705882	0.0712839	4.39435	0.45513	2	7	0.00170503	0.285714	0.846308	1	Not associated
GO Biological Process	GO:0010608	posttranscriptional regulation of gene expression	0.000493341	1.67155	28.7158	48	0.0337833	0.0564706	0.0645444	1.31059	25.9424	34	399	0.0289855	0.085213	0.851013	1	Not associated
GO Biological Process	GO:0033572	transferrin transport	0.000506488	5.16585	1.35505	7	0.00159418	0.00823529	0.0135006	2.97682	2.01558	6	31	0.00511509	0.193548	0.873692	1	Not associated
GO Biological Process	GO:0008543	fibroblast growth factor receptor signaling pathway	0.000508707	1.88947	17.4652	33	0.0205473	0.0388235	0.000155927	2.25076	10.6631	24	164	0.0204604	0.146342	0.87752	0.268974	Not associated
GO Biological Process	GO:0010543	regulation of platelet activation	0.000514572	3.67737	2.71933	10	0.00319921	0.0117647	0.00556749	3.54928	1.69048	6	26	0.00511509	0.230769	0.887637	1	Not associated
GO Cellular Component	GO:0031975	envelope	0.000515569	1.44739	58.0356	84	0.0682772	0.0988235	0.0632791	1.20352	56.5011	68	869	0.057971	0.0782509	0.889357	1	Not associated
GO Biological Process	GO:0042752	regulation of circadian rhythm	0.00052171	4.01653	2.24074	9	0.00263617	0.0105882	0.38201	1.35708	2.21063	3	34	0.00255755	0.0882353	0.89995	1	Not associated
GO Biological Process	GO:0002576	platelet degranulation	0.000522365	2.55531	6.65281	17	0.00782683	0.02	0.00869619	2.17132	5.52658	12	85	0.0102302	0.141177	0.90108	1	Not associated
MSigDB Pathway	REACTOME_CELL_CYCLE_MITOTIC	Genes involved in Cell Cycle, Mitotic	0.000539082	1.82524	19.7234	36	0.0232041	0.0423529	0.0768652	1.33526	20.2208	27	311	0.0230179	0.0868167	0.929916	1	Not associated
GO Biological Process	GO:0050794	regulation of cellular process	0.000550426	1.0773	574.587	619	0.675984	0.728235	0.000150543	1.10479	575.674	636	8854	0.542199	0.0718319	0.949485	0.259687	Not associated
GO Molecular Function	GO:0051400	BH domain binding	0.000563992	10.8855	0.367463	4	0.000432309	0.00470588	0.0119874	5.76758	0.520149	3	8	0.00255755	0.375	0.972886	1	Not associated
MSigDB Pathway	REACTOME_CELL_DEATH_SIGNALLING_VIA_NRAGE_NRIF_AND_NADE	Genes involved in Cell death signalling via NRAGE, NRIF and NADE	0.000566734	2.72843	5.49768	15	0.00646785	0.0176471	0.00388432	2.65176	3.77108	10	58	0.00852515	0.172414	0.977617	1	Not associated
GO Biological Process	GO:0090322	regulation of superoxide metabolic process	0.000569305	6.03564	0.994095	6	0.00116952	0.00705882	0.00140539	5.49294	0.91026	5	14	0.00426258	0.357143	0.982051	1	Not associated
GO Molecular Function	GO:0019900	kinase binding	0.000592098	1.57275	36.8782	58	0.0433861	0.0682353	0.000708278	1.64397	27.3728	45	421	0.0383632	0.106888	1	1	Not associated
GO Biological Process	GO:0019221	cytokine-mediated signaling pathway	0.00059301	1.81539	19.8304	36	0.0233299	0.0423529	0.102256	1.29366	20.871	27	321	0.0230179	0.0841121	1	1	Not associated
GO Biological Process	GO:0051701	interaction with host	0.000593755	1.68898	26.6433	45	0.0313451	0.0529412	0.0811779	1.28819	25.6173	33	394	0.028133	0.0837563	1	1	Not associated
GO Biological Process	GO:0038093	Fc receptor signaling pathway	0.000597773	1.76632	22.0798	39	0.0259762	0.0458824	0.000544097	1.94863	14.3691	28	221	0.0238704	0.126697	1	0.938568	Not associated
GO Biological Process	GO:0030168	platelet activation	0.000604626	1.85007	18.3777	34	0.0216208	0.04	0.00072273	1.9405	13.914	27	214	0.0230179	0.126168	1	1	Not associated
GO Biological Process	GO:0038095	Fc-epsilon receptor signaling pathway	0.0006157	1.84809	18.3974	34	0.021644	0.04	0.000611325	2.09317	10.9881	23	169	0.0196078	0.136095	1	1	Not associated
GO Cellular Component	GO:0031095	platelet dense tubular network membrane	0.000616412	7.52874	0.664122	5	0.00078132	0.00588235	0.112172	3.41783	0.585167	2	9	0.00170503	0.222222	1	1	Not associated
GO Cellular Component	GO:0033179	proton-transporting V-type ATPase, V0 domain	0.00061667	10.6264	0.376421	4	0.000442848	0.00470588	0.023294	4.61407	0.650186	3	10	0.00255755	0.3	1	1	Not associated
MSigDB Pathway	REACTOME_CYTOKINE_SIGNALING_IN_IMMUNE_SYSTEM	Genes involved in Cytokine Signaling in Immune system	0.000630328	1.84553	18.4229	34	0.021674	0.04	0.0409445	1.44551	17.2949	25	266	0.0213129	0.093985	1	1	Not associated
PANTHER Pathway	P00006	Apoptosis signaling pathway	0.000631707	2.51119	6.7697	17	0.00796435	0.02	0.0185415	1.90422	6.82695	13	105	0.0110827	0.12381	1	1	Not associated
GO Biological Process	GO:0032863	activation of Rac GTPase activity	0.000631859	5.91494	1.01438	6	0.00119339	0.00705882	0.134391	3.07604	0.650186	2	10	0.00170503	0.2	1	1	Not associated
GO Biological Process	GO:0012501	programmed cell death	0.00063503	1.35122	85.1082	115	0.100127	0.135294	0.00221163	1.34249	68.5296	92	1054	0.0784314	0.0872865	1	1	Not associated
GO Biological Process	GO:0034199	activation of protein kinase A activity	0.000636687	4.34509	1.84116	8	0.00216607	0.00941177	0.021398	3.61888	1.10532	4	17	0.00341006	0.235294	1	1	Not associated
GO Cellular Component	GO:0031301	integral to organelle membrane	0.000651527	1.98124	14.1326	28	0.0166266	0.0329412	0.0143022	1.65056	13.3288	22	205	0.0187553	0.107317	1	1	Not associated
GO Biological Process	GO:0031062	positive regulation of histone methylation	0.000652173	4.94634	1.41519	7	0.00166493	0.00823529	0.35292	1.61897	1.23535	2	19	0.00170503	0.105263	1	1	Not associated
GO Biological Process	GO:0051570	regulation of histone H3-K9 methylation	0.000664453	5.85744	1.02434	6	0.0012051	0.00705882	0.416048	1.92253	0.520149	1	8	0.000852515	0.125	1	1	Not associated
GO Biological Process	GO:0008286	insulin receptor signaling pathway	0.000665624	2.03897	12.7515	26	0.0150018	0.0305882	0.00812386	1.85801	9.68777	18	149	0.0153453	0.120805	1	1	Not associated
MSigDB Pathway	BIOCARTA_CK1_PATHWAY	Regulation of ck1/cdk5 by type 1 glutamate receptors	0.000691063	4.28983	1.86487	8	0.00219397	0.00941177	0.304116	1.80944	1.10532	2	17	0.00170503	0.117647	1	1	Not associated
MSigDB Pathway	REACTOME_CA_DEPENDENT_EVENTS	Genes involved in Ca-dependent events	0.00070104	3.28145	3.35218	11	0.00394374	0.0129412	0.00212199	3.71247	1.88554	7	29	0.0059676	0.241379	1	1	Not associated
MSigDB Pathway	REACTOME_S_PHASE	Genes involved in S Phase	0.000701316	2.67086	5.61618	15	0.00660727	0.0176471	0.024518	1.83434	7.08702	13	109	0.0110827	0.119266	1	1	Not associated
GO Biological Process	GO:0006900	membrane budding	0.000708058	3.27738	3.35634	11	0.00394863	0.0129412	0.00779922	2.73426	2.92584	8	45	0.00682012	0.177778	1	1	Not associated
GO Cellular Component	GO:0000307	cyclin-dependent protein kinase holoenzyme complex	0.000720481	4.86192	1.43976	7	0.00169384	0.00823529	0.00368844	4.5236	1.10532	5	17	0.00426258	0.294118	1	1	Not associated
GO Biological Process	GO:0031061	negative regulation of histone methylation	0.000725912	4.8556	1.44163	7	0.00169604	0.00823529	0.18122	2.56337	0.780223	2	12	0.00170503	0.166667	1	1	Not associated
GO Cellular Component	GO:0035098	ESC/E(Z) complex	0.000738431	4.84125	1.44591	7	0.00170107	0.00823529	0.205441	2.36619	0.845241	2	13	0.00170503	0.153846	1	1	Not associated
GO Biological Process	GO:0001776	leukocyte homeostasis	0.000742988	2.65537	5.64894	15	0.00664581	0.0176471	0.173693	1.59106	3.77108	6	58	0.00511509	0.103448	1	1	Not associated
GO Biological Process	GO:0044249	cellular biosynthetic process	0.000744698	1.15258	294.99	340	0.347047	0.4	0.00528099	1.13623	267.551	304	4115	0.259165	0.0738761	1	1	Not associated
MSigDB Pathway	BIOCARTA_PAR1_PATHWAY	Thrombin signaling and protease-activated receptors	0.000745095	2.90105	4.48114	13	0.00527193	0.0152941	0.00889642	2.90977	2.40569	7	37	0.0059676	0.189189	1	1	Not associated
GO Biological Process	GO:0006915	apoptotic process	0.000746701	1.34928	83.7481	113	0.0985272	0.132941	0.0031407	1.33098	67.6193	90	1040	0.0767263	0.0865385	1	1	Not associated
GO Biological Process	GO:0035456	response to interferon-beta	0.000751827	7.19989	0.694455	5	0.000817006	0.00588235	0.0582344	3.29576	0.91026	3	14	0.00255755	0.214286	1	1	Not associated
GO Biological Process	GO:0060055	angiogenesis involved in wound healing	0.000753859	7.1955	0.694878	5	0.000817504	0.00588235	0.023294	4.61407	0.650186	3	10	0.00255755	0.3	1	1	Not associated
GO Biological Process	GO:0002768	immune response-regulating cell surface receptor signaling pathway	0.00075896	1.65767	27.7497	46	0.0326468	0.0541177	0.00165142	1.7205	19.1805	33	295	0.028133	0.111864	1	1	Not associated
MSigDB Pathway	KEGG_CHRONIC_MYELOID_LEUKEMIA	Chronic myeloid leukemia	0.000767928	2.46622	6.89315	17	0.00810959	0.02	0.000884536	2.70193	4.81137	13	74	0.0110827	0.175676	1	1	Not associated
MSigDB Pathway	REACTOME_SIGNALING_BY_ERBB2	Genes involved in Signaling by ERBB2	0.000769139	2.26898	8.81452	20	0.01037	0.0235294	0.00393772	2.21983	6.3068	14	97	0.0119352	0.14433	1	1	Not associated
GO Cellular Component	GO:0031300	intrinsic to organelle membrane	0.000771086	1.9325	15.0065	29	0.0176547	0.0341176	0.0143001	1.63016	14.109	23	217	0.0196078	0.105991	1	1	Not associated
GO Biological Process	GO:0051234	establishment of localization	0.00078074	1.17739	240.361	283	0.282778	0.332941	0.0153736	1.1324	215.471	244	3314	0.208014	0.073627	1	1	Not associated
GO Biological Process	GO:1901698	response to nitrogen compound	0.000782498	1.42001	60.563	86	0.0712506	0.101177	0.000910725	1.48326	43.8225	65	674	0.0554135	0.0964392	1	1	Not associated
GO Biological Process	GO:0000086	G2/M transition of mitotic cell cycle	0.000804313	2.2605	8.8476	20	0.0104089	0.0235294	0.062841	1.59954	8.12732	13	125	0.0110827	0.104	1	1	Not associated
GO Cellular Component	GO:0005740	mitochondrial envelope	0.000809398	1.59674	32.5663	52	0.0383133	0.0611765	0.139676	1.18521	36.2804	43	558	0.0366581	0.0770609	1	1	Not associated
MSigDB Pathway	REACTOME_MITOTIC_G1_G1_S_PHASES	Genes involved in Mitotic G1-G1/S phases	0.000821991	2.37805	7.56921	18	0.00890496	0.0211765	0.0125843	1.85025	8.64747	16	133	0.0136402	0.120301	1	1	Not associated
GO Cellular Component	GO:0070603	SWI/SNF superfamily-type complex	0.000825968	2.86792	4.5329	13	0.00533282	0.0152941	0.0932365	1.79436	3.90111	7	60	0.0059676	0.116667	1	1	Not associated
GO Biological Process	GO:0006658	phosphatidylserine metabolic process	0.000863441	4.71145	1.48574	7	0.00174793	0.00823529	0.0205678	3.07604	1.62546	5	25	0.00426258	0.2	1	1	Not associated
MSigDB Pathway	REACTOME_INTERFERON_SIGNALING	Genes involved in Interferon Signaling	0.000875289	2.30116	8.25671	19	0.00971377	0.0223529	0.202354	1.29833	10.0129	13	154	0.0110827	0.0844156	1	1	Not associated
GO Biological Process	GO:0032479	regulation of type I interferon production	0.000902554	2.6035	5.76148	15	0.00677821	0.0176471	0.00799666	2.0507	6.82695	14	105	0.0119352	0.133333	1	1	Not associated
MSigDB Pathway	PID_P73PATHWAY	p73 transcription factor network	0.000903477	2.71156	5.16308	14	0.00607421	0.0164706	0.0701442	1.75218	5.13647	9	79	0.00767263	0.113924	1	1	Not associated
GO Biological Process	GO:0008089	anterograde axon cargo transport	0.00094063	5.47266	1.09636	6	0.00128984	0.00705882	0.787164	0.668705	1.49543	1	23	0.000852515	0.0434783	1	1	Not associated
GO Biological Process	GO:0034645	cellular macromolecule biosynthetic process	0.000954706	1.17121	245.9	288	0.289294	0.338823	0.0250815	1.12017	215.146	241	3309	0.205456	0.0728317	1	1	Not associated
GO Biological Process	GO:0051247	positive regulation of protein metabolic process	0.000958245	1.3375	85.2338	114	0.100275	0.134118	0.000141093	1.46555	62.0927	91	955	0.0775789	0.095288	1	0.243385	Not associated
MSigDB Pathway	REACTOME_DAG_AND_IP3_SIGNALING	Genes involved in DAG and IP3 signaling	0.000959772	3.15476	3.48679	11	0.00410211	0.0129412	0.00319077	3.47295	2.01558	7	31	0.0059676	0.225806	1	1	Not associated
GO Cellular Component	GO:0016281	eukaryotic translation initiation factor 4F complex	0.000960842	9.42175	0.42455	4	0.00049947	0.00470588	0.112172	3.41783	0.585167	2	9	0.00170503	0.222222	1	1	Not associated
MSigDB Pathway	REACTOME_PKA_MEDIATED_PHOSPHORYLATION_OF_CREB	Genes involved in PKA-mediated phosphorylation of CREB	0.000961318	4.07261	1.96434	8	0.00231099	0.00941177	0.021398	3.61888	1.10532	4	17	0.00341006	0.235294	1	1	Not associated
GO Biological Process	GO:0006810	transport	0.000979149	1.17623	235.499	277	0.277058	0.325882	0.0248272	1.12147	212.221	238	3264	0.202899	0.0729167	1	1	Not associated
GO Biological Process	GO:0009987	cellular process	0.000982098	1.04101	735.827	766	0.865679	0.901177	0.00543773	1.04174	878.336	915	13509	0.780051	0.0677326	1	1	Not associated
GO Biological Process	GO:0030512	negative regulation of transforming growth factor beta receptor signaling pathway	0.000993682	2.57804	5.81838	15	0.00684515	0.0176471	0.00330776	2.56337	4.29123	11	66	0.00937766	0.166667	1	1	Not associated
GO Biological Process	GO:0055072	iron ion homeostasis	0.0010155	2.5723	5.83135	15	0.00686041	0.0176471	0.0123871	2.07374	5.78665	12	89	0.0102302	0.134831	1	1	Not associated
GO Biological Process	GO:0006401	RNA catabolic process	0.00102535	2.07997	11.0578	23	0.0130092	0.0270588	0.149029	1.30587	13.7839	18	212	0.0153453	0.0849057	1	1	Not associated
MSigDB Pathway	REACTOME_SYNTHESIS_OF_DNA	Genes involved in Synthesis of DNA	0.00103878	2.94295	4.07754	12	0.00479711	0.0141177	0.0360861	1.83894	5.98171	11	92	0.00937766	0.119565	1	1	Not associated
GO Molecular Function	GO:0016538	cyclin-dependent protein serine/threonine kinase regulator activity	0.00104547	4.55642	1.53629	7	0.0018074	0.00823529	0.0119758	3.49551	1.43041	5	22	0.00426258	0.227273	1	1	Not associated
GO Biological Process	GO:0032438	melanosome organization	0.00104853	4.55409	1.53708	7	0.00180833	0.00823529	0.32864	1.70891	1.17033	2	18	0.00170503	0.111111	1	1	Not associated
GO Molecular Function	GO:0005149	interleukin-1 receptor binding	0.00106386	9.16333	0.436523	4	0.000513556	0.00470588	0.304116	1.80944	1.10532	2	17	0.00170503	0.117647	1	1	Not associated
GO Biological Process	GO:0007265	Ras protein signal transduction	0.00108655	2.00016	12.499	25	0.0147047	0.0294118	0.00181232	2.08732	9.1026	19	140	0.0161978	0.135714	1	1	Not associated
MSigDB Pathway	BIOCARTA_MYOSIN_PATHWAY	PKC-catalyzed phosphorylation of inhibitory phosphoprotein of myosin phosphatase	0.00109116	3.32621	3.00643	10	0.00353697	0.0117647	0.139346	1.98455	2.01558	4	31	0.00341006	0.129032	1	1	Not associated
GO Biological Process	GO:0044403	symbiosis, encompassing mutualism through parasitism	0.00109306	1.51291	40.3196	61	0.0474349	0.0717647	0.324847	1.0741	43.7575	47	673	0.0400682	0.0698365	1	1	Not associated
MSigDB Pathway	PID_SMAD2_3PATHWAY	Regulation of cytoplasmic and nuclear SMAD2/3 signaling	0.00109325	4.52079	1.5484	7	0.00182165	0.00823529	0.00368844	4.5236	1.10532	5	17	0.00426258	0.294118	1	1	Not associated
GO Biological Process	GO:0045916	negative regulation of complement activation	0.00109525	9.09074	0.440008	4	0.000517656	0.00470588	0.0712839	4.39435	0.45513	2	7	0.00170503	0.285714	1	1	Not associated
GO Cellular Component	GO:0005865	striated muscle thin filament	0.00109836	6.60683	0.756792	5	0.000890344	0.00588235	0.0942905	2.71416	1.10532	3	17	0.00255755	0.176471	1	1	Not associated
GO Biological Process	GO:0090080	positive regulation of MAPKKK cascade by fibroblast growth factor receptor signaling pathway	0.00110677	9.06475	0.44127	4	0.000519141	0.00470588	0.0531656	5.12674	0.390111	2	6	0.00170503	0.333333	1	1	Not associated
GO Molecular Function	GO:0001614	purinergic nucleotide receptor activity	0.00112309	6.57335	0.760647	5	0.000894878	0.00588235	0.0314395	3.23794	1.23535	4	19	0.00341006	0.210526	1	1	Not associated
GO Biological Process	GO:0035590	purinergic nucleotide receptor signaling pathway	0.00112309	6.57335	0.760647	5	0.000894878	0.00588235	0.0314395	3.23794	1.23535	4	19	0.00341006	0.210526	1	1	Not associated
GO Biological Process	GO:0006996	organelle organization	0.00112793	1.21861	168.225	205	0.197912	0.241176	0.0111063	1.17832	145.121	171	2232	0.14578	0.0766129	1	1	Not associated
MSigDB Pathway	REACTOME_REGULATION_OF_WATER_BALANCE_BY_RENAL_AQUAPORINS	Genes involved in Regulation of Water Balance by Renal Aquaporins	0.00113127	3.0897	3.56021	11	0.00418848	0.0129412	0.0580806	2.14608	2.7958	6	43	0.00511509	0.139535	1	1	Not associated
MSigDB Pathway	PID_RB_1PATHWAY	Regulation of retinoblastoma protein	0.00114264	2.64403	5.29494	14	0.00622934	0.0164706	0.00292453	2.60281	4.22621	11	65	0.00937766	0.169231	1	1	Not associated
GO Biological Process	GO:0042921	glucocorticoid receptor signaling pathway	0.0011429	6.54716	0.763689	5	0.000898458	0.00588235	0.112172	3.41783	0.585167	2	9	0.00170503	0.222222	1	1	Not associated
GO Biological Process	GO:0044765	single-organism transport	0.00116184	1.19797	194.495	233	0.228818	0.274118	0.00887076	1.16857	169.438	198	2606	0.168798	0.0759785	1	1	Not associated
MSigDB Pathway	BIOCARTA_NTHI_PATHWAY	NFkB activation by Nontypeable Hemophilus influenzae	0.0011652	3.57696	2.5161	9	0.00296012	0.0105882	0.0145011	3.34353	1.49543	5	23	0.00426258	0.217391	1	1	Not associated
GO Biological Process	GO:0032870	cellular response to hormone stimulus	0.00116667	1.5029	41.2537	62	0.0485338	0.0729412	0.000186391	1.71288	28.023	48	431	0.0409207	0.111369	1	0.321524	Not associated
GO Biological Process	GO:0002520	immune system development	0.0011713	1.4572	48.7236	71	0.0573219	0.0835294	0.00014198	1.69085	30.7538	52	473	0.0443308	0.109937	1	0.244915	Not associated
GO Biological Process	GO:0006796	phosphate-containing compound metabolic process	0.00118726	1.22631	158.198	194	0.186116	0.228235	0.00252382	1.23224	131.468	162	2022	0.138107	0.0801187	1	1	Not associated
MSigDB Pathway	REACTOME_PYRUVATE_METABOLISM	Genes involved in Pyruvate metabolism	0.00119445	5.22049	1.14932	6	0.00135214	0.00705882	0.32864	1.70891	1.17033	2	18	0.00170503	0.111111	1	1	Not associated
GO Biological Process	GO:0006402	mRNA catabolic process	0.00120266	2.18467	9.15471	20	0.0107703	0.0235294	0.223443	1.24704	12.0284	15	185	0.0127877	0.0810811	1	1	Not associated
GO Cellular Component	GO:0044428	nuclear part	0.00122517	1.21052	175.958	213	0.207009	0.250588	0.13145	1.08259	160.726	174	2472	0.148338	0.0703884	1	1	Not associated
GO Biological Process	GO:0009058	biosynthetic process	0.00124832	1.14146	304.871	348	0.358672	0.409412	0.00521038	1.13301	278.019	315	4276	0.268542	0.073667	1	1	Not associated
MSigDB Pathway	PID_TNFPATHWAY	TNF receptor signaling pathway	0.00127118	3.04406	3.61359	11	0.00425128	0.0129412	0.00891636	2.67482	2.99085	8	46	0.00682012	0.173913	1	1	Not associated
GO Biological Process	GO:0031400	negative regulation of protein modification process	0.00128139	1.57861	31.6734	50	0.0372629	0.0588235	0.00801331	1.52112	23.6668	36	364	0.0306905	0.0989011	1	1	Not associated
MSigDB Pathway	BIOCARTA_P35ALZHEIMERS_PATHWAY	Deregulation of CDK5 in Alzheimers Disease	0.00130743	6.34872	0.787561	5	0.000926542	0.00588235	0.522756	1.3982	0.715204	1	11	0.000852515	0.0909091	1	1	Not associated
MSigDB Pathway	PID_INSULIN_PATHWAY	Insulin Pathway	0.0013322	2.717	4.78469	13	0.00562904	0.0152941	0.00212551	3.07604	2.92584	9	45	0.00767263	0.2	1	1	Not associated
GO Biological Process	GO:1901991	negative regulation of mitotic cell cycle phase transition	0.00133407	2.03751	11.2883	23	0.0132803	0.0270588	0.0383099	1.59429	10.6631	17	164	0.0144928	0.103659	1	1	Not associated
GO Biological Process	GO:0046596	regulation of viral entry into host cell	0.0013354	8.60956	0.4646	4	0.000546588	0.00470588	0.0531656	5.12674	0.390111	2	6	0.00170503	0.333333	1	1	Not associated
MSigDB Pathway	BIOCARTA_HIVNEF_PATHWAY	HIV-I Nef: negative effector of Fas and TNF	0.00137373	3.01392	3.64973	11	0.0042938	0.0129412	0.030231	2.15863	3.70606	8	57	0.00682012	0.140351	1	1	Not associated
GO Biological Process	GO:1901701	cellular response to oxygen-containing compound	0.0013909	1.40159	59.2183	83	0.0696686	0.0976471	0.000457181	1.52847	41.872	64	644	0.0545609	0.0993789	1	0.788638	Not associated
GO Biological Process	GO:0032868	response to insulin stimulus	0.00139273	1.75896	19.3296	34	0.0227407	0.04	0.0342027	1.49892	15.3444	23	236	0.0196078	0.0974576	1	1	Not associated
GO Biological Process	GO:0044772	mitotic cell cycle phase transition	0.00141413	1.74097	20.1038	35	0.0236515	0.0411765	0.0252074	1.48841	18.1402	27	279	0.0230179	0.0967742	1	1	Not associated
GO Biological Process	GO:0046907	intracellular transport	0.00141574	1.35015	74.8066	101	0.0880077	0.118823	0.125884	1.13461	71.3904	81	1098	0.0690537	0.0737705	1	1	Not associated
GO Biological Process	GO:0006417	regulation of translation	0.00141868	1.83267	16.3695	30	0.0192583	0.0352941	0.311241	1.14398	15.7345	18	242	0.0153453	0.0743802	1	1	Not associated
GO Biological Process	GO:0050873	brown fat cell differentiation	0.00142429	3.47263	2.5917	9	0.00304906	0.0105882	0.309355	1.53802	1.95056	3	30	0.00255755	0.1	1	1	Not associated
GO Biological Process	GO:0009967	positive regulation of signal transduction	0.00144828	1.32129	86.2791	114	0.101505	0.134118	0.000109478	1.49922	56.6962	85	872	0.0724638	0.0974771	1	0.18885	Not associated
GO Biological Process	GO:0071345	cellular response to cytokine stimulus	0.00145096	1.59477	29.4713	47	0.0346721	0.0552941	0.0570665	1.3082	28.2831	37	435	0.0315431	0.0850575	1	1	Not associated
MSigDB Pathway	REACTOME_RIP_MEDIATED_NFKB_ACTIVATION_VIA_DAI	Genes involved in RIP-mediated NFkB activation via DAI	0.0014538	6.1958	0.806998	5	0.000949409	0.00588235	0.107923	2.56337	1.17033	3	18	0.00255755	0.166667	1	1	Not associated
MSigDB Pathway	REACTOME_DOWNSTREAM_SIGNALING_OF_ACTIVATED_FGFR	Genes involved in Downstream signaling of activated FGFR	0.00145689	2.14881	9.30748	20	0.01095	0.0235294	0.00994689	2.06127	6.3068	13	97	0.0110827	0.134021	1	1	Not associated
GO Biological Process	GO:0010468	regulation of gene expression	0.00147455	1.14397	291.965	334	0.343488	0.392941	0.00427433	1.149	243.69	280	3748	0.238704	0.0747065	1	1	Not associated
GO Biological Process	GO:0044770	cell cycle phase transition	0.00147467	1.73651	20.1554	35	0.0237123	0.0411765	0.0272982	1.47782	18.2702	27	281	0.0230179	0.0960854	1	1	Not associated
MSigDB Pathway	BIOCARTA_KERATINOCYTE_PATHWAY	Keratinocyte Differentiation	0.00148151	2.81976	4.25568	12	0.00500668	0.0141177	0.00779922	2.73426	2.92584	8	45	0.00682012	0.177778	1	1	Not associated
GO Biological Process	GO:0007017	microtubule-based process	0.00149605	1.5587	32.7195	51	0.0384936	0.06	0.0708225	1.29401	27.0477	35	416	0.029838	0.0841346	1	1	Not associated
GO Cellular Component	GO:0005764	lysosome	0.00149953	1.60131	28.7265	46	0.0337959	0.0541177	0.10515	1.24608	28.088	35	432	0.029838	0.0810185	1	1	Not associated
GO Cellular Component	GO:0031011	Ino80 complex	0.00150734	8.32702	0.480364	4	0.000565134	0.00470588	0.609978	1.09859	0.91026	1	14	0.000852515	0.0714286	1	1	Not associated
GO Biological Process	GO:0044344	cellular response to fibroblast growth factor stimulus	0.00150978	1.75013	19.4271	34	0.0228554	0.04	0.000341666	2.10112	11.8984	25	183	0.0213129	0.136612	1	0.589373	Not associated
GO Biological Process	GO:0048534	hematopoietic or lymphoid organ development	0.00157444	1.45351	46.7831	68	0.055039	0.08	0.00012403	1.72038	29.0633	50	447	0.0426257	0.111857	1	0.213951	Not associated
GO Biological Process	GO:0002921	negative regulation of humoral immune response	0.0015745	8.2274	0.486181	4	0.000571977	0.00470588	0.112172	3.41783	0.585167	2	9	0.00170503	0.222222	1	1	Not associated
MSigDB Pathway	REACTOME_IRON_UPTAKE_AND_TRANSPORT	Genes involved in Iron uptake and transport	0.00157687	4.23672	1.65222	7	0.00194379	0.00823529	0.08158	2.13614	2.34067	5	36	0.00426258	0.138889	1	1	Not associated
GO Biological Process	GO:0071774	response to fibroblast growth factor stimulus	0.00158811	1.7446	19.4887	34	0.0229279	0.04	0.000371529	2.0897	11.9634	25	184	0.0213129	0.13587	1	0.640887	Not associated
GO Biological Process	GO:0055076	transition metal ion homeostasis	0.00160333	2.29979	7.39199	17	0.00869646	0.02	0.0195978	1.84037	7.60717	14	117	0.0119352	0.119658	1	1	Not associated
MSigDB Pathway	KEGG_PROSTATE_CANCER	Prostate cancer	0.0016034	2.18096	8.71175	19	0.0102491	0.0223529	0.0123871	2.07374	5.78665	12	89	0.0102302	0.134831	1	1	Not associated
GO Biological Process	GO:0032930	positive regulation of superoxide anion generation	0.00162938	13.2493	0.226428	3	0.000266386	0.00352941	0.00786971	6.59152	0.45513	3	7	0.00255755	0.428571	1	1	Not associated
GO Molecular Function	GO:0001530	lipopolysaccharide binding	0.00165933	6.00965	0.831996	5	0.000978818	0.00588235	0.0582344	3.29576	0.91026	3	14	0.00255755	0.214286	1	1	Not associated
MSigDB Pathway	BIOCARTA_TID_PATHWAY	Chaperones modulate interferon Signaling Pathway	0.00171179	4.85855	1.23494	6	0.00145287	0.00705882	0.0373358	3.07604	1.30037	4	20	0.00341006	0.2	1	1	Not associated
GO Biological Process	GO:0002285	lymphocyte activation involved in immune response	0.00171739	2.63859	4.92688	13	0.00579633	0.0152941	0.0107537	2.42846	3.70606	9	57	0.00767263	0.157895	1	1	Not associated
GO Biological Process	GO:0009059	macromolecule biosynthetic process	0.00174929	1.15855	251.175	291	0.2955	0.342353	0.0225191	1.12181	218.397	245	3359	0.208866	0.0729384	1	1	Not associated
MSigDB Pathway	PID_FCER1PATHWAY	Fc-epsilon receptor I signaling in mast cells	0.00176522	2.42839	6.17693	15	0.00726697	0.0176471	0.00173165	2.77348	3.96613	11	61	0.00937766	0.180328	1	1	Not associated
GO Cellular Component	GO:0001772	immunological synapse	0.00177019	4.14992	1.68678	7	0.00198445	0.00823529	0.20242	1.92253	1.56045	3	24	0.00255755	0.125	1	1	Not associated
GO Biological Process	GO:0007179	transforming growth factor beta receptor signaling pathway	0.00177514	1.99163	11.5483	23	0.0135863	0.0270588	0.000178026	2.4413	8.19234	20	126	0.0170503	0.15873	1	0.307095	Not associated
MSigDB Pathway	REACTOME_GLUCAGON_SIGNALING_IN_METABOLIC_REGULATION	Genes involved in Glucagon signaling in metabolic regulation	0.00177953	3.35934	2.67909	9	0.00315188	0.0105882	0.0601009	2.33034	2.14561	5	33	0.00426258	0.151515	1	1	Not associated
MSigDB Pathway	REACTOME_AQUAPORIN_MEDIATED_TRANSPORT	Genes involved in Aquaporin-mediated transport	0.0017811	2.91433	3.77445	11	0.00444052	0.0129412	0.104022	1.84563	3.25093	6	50	0.00511509	0.12	1	1	Not associated
MSigDB Pathway	BIOCARTA_NKCELLS_PATHWAY	Ras-Independent pathway in NK cell-mediated cytotoxicity	0.00178953	4.14184	1.69007	7	0.00198832	0.00823529	0.0373358	3.07604	1.30037	4	20	0.00341006	0.2	1	1	Not associated
MSigDB Pathway	REACTOME_PHOSPHOLIPASE_C_MEDIATED_CASCADE	Genes involved in Phospholipase C-mediated cascade	0.00179412	2.42422	6.18756	15	0.00727948	0.0176471	0.0066757	2.61174	3.44598	9	53	0.00767263	0.169811	1	1	Not associated
GO Biological Process	GO:0000244	spliceosomal tri-snRNP complex assembly	0.00179855	12.7948	0.234471	3	0.000275848	0.00352941	0.0531656	5.12674	0.390111	2	6	0.00170503	0.333333	1	1	Not associated
MSigDB Pathway	REACTOME_BASIGIN_INTERACTIONS	Genes involved in Basigin interactions	0.00182335	4.12793	1.69577	7	0.00199502	0.00823529	0.20242	1.92253	1.56045	3	24	0.00255755	0.125	1	1	Not associated
MSigDB Pathway	REACTOME_NFKB_IS_ACTIVATED_AND_SIGNALS_SURVIVAL	Genes involved in NF-kB is activated and signals survival	0.0018364	7.8842	0.507344	4	0.000596875	0.00470588	0.023294	4.61407	0.650186	3	10	0.00255755	0.3	1	1	Not associated
GO Biological Process	GO:0043068	positive regulation of programmed cell death	0.00185359	1.52093	35.5045	54	0.0417701	0.0635294	0.000185703	1.80168	22.7565	41	350	0.0349531	0.117143	1	0.320338	Not associated
GO Biological Process	GO:0051248	negative regulation of protein metabolic process	0.00188302	1.45198	45.4552	66	0.0534768	0.0776471	0.0219238	1.35116	34.7849	47	535	0.0400682	0.0878505	1	1	Not associated
GO Biological Process	GO:0050900	leukocyte migration	0.00191193	1.77635	17.4516	31	0.0205313	0.0364706	0.149029	1.30587	13.7839	18	212	0.0153453	0.0849057	1	1	Not associated
GO Cellular Component	GO:0030529	ribonucleoprotein complex	0.00191496	1.52541	34.7447	53	0.0408761	0.0623529	0.275381	1.09859	40.9617	45	630	0.0383632	0.0714286	1	1	Not associated
GO Biological Process	GO:0072331	signal transduction by p53 class mediator	0.00191925	2.25982	7.52272	17	0.00885026	0.02	0.0902805	1.53802	7.80223	12	120	0.0102302	0.1	1	1	Not associated
GO Biological Process	GO:0040029	regulation of gene expression, epigenetic	0.00195419	2.09423	9.55006	20	0.0112354	0.0235294	0.0962389	1.49211	8.71249	13	134	0.0110827	0.0970149	1	1	Not associated
GO Molecular Function	GO:0043168	anion binding	0.00199403	1.17233	219.222	257	0.257909	0.302353	0.0116045	1.15704	177.176	205	2725	0.174766	0.0752294	1	1	Not associated
GO Molecular Function	GO:0008168	methyltransferase activity	0.00199521	1.85732	14.5371	27	0.0171024	0.0317647	0.0435696	1.50787	13.2638	20	204	0.0170503	0.0980392	1	1	Not associated
MSigDB Pathway	REACTOME_TCA_CYCLE_AND_RESPIRATORY_ELECTRON_TRANSPORT	Genes involved in The citric acid (TCA) cycle and respiratory electron transport	0.00200731	2.31775	6.90324	16	0.00812145	0.0188235	0.32938	1.19226	8.38739	10	129	0.00852515	0.0775194	1	1	Not associated
GO Biological Process	GO:0010243	response to organonitrogen compound	0.00200738	1.38926	58.3045	81	0.0685935	0.0952941	0.0013162	1.48214	41.1568	61	633	0.0520034	0.0963665	1	1	Not associated
GO Biological Process	GO:0048753	pigment granule organization	0.00203854	4.0458	1.73019	7	0.00203552	0.00823529	0.35292	1.61897	1.23535	2	19	0.00170503	0.105263	1	1	Not associated
MSigDB Pathway	REACTOME_SIGNALING_BY_TGF_BETA_RECEPTOR_COMPLEX	Genes involved in Signaling by TGF-beta Receptor Complex	0.00204949	2.5847	5.0296	13	0.00591718	0.0152941	0.00499151	2.56337	3.90111	10	60	0.00852515	0.166667	1	1	Not associated
GO Biological Process	GO:0051607	defense response to virus	0.00206329	2.31124	6.92269	16	0.00814434	0.0188235	0.255416	1.24704	9.62275	12	148	0.0102302	0.0810811	1	1	Not associated
GO Biological Process	GO:0006793	phosphorus metabolic process	0.0020672	1.21021	161.956	196	0.190536	0.230588	0.00197707	1.23578	134.328	166	2066	0.141517	0.0803485	1	1	Not associated
GO Molecular Function	GO:0051082	unfolded protein binding	0.00210546	2.85121	3.85801	11	0.00453884	0.0129412	0.266876	1.30896	6.11174	8	94	0.00682012	0.0851064	1	1	Not associated
GO Biological Process	GO:0035455	response to interferon-alpha	0.00213016	5.6709	0.881694	5	0.00103729	0.00588235	0.0942905	2.71416	1.10532	3	17	0.00255755	0.176471	1	1	Not associated
GO Biological Process	GO:0043647	inositol phosphate metabolic process	0.00213279	2.69638	4.45042	12	0.00523578	0.0141177	0.00259687	2.7964	3.57602	10	55	0.00852515	0.181818	1	1	Not associated
GO Biological Process	GO:0010821	regulation of mitochondrion organization	0.0021642	2.37628	6.31238	15	0.00742633	0.0176471	0.0168259	2.0632	5.33152	11	82	0.00937766	0.134146	1	1	Not associated
GO Biological Process	GO:0032259	methylation	0.00219825	1.74177	18.3721	32	0.0216142	0.0376471	0.0406473	1.45899	16.4497	24	253	0.0204604	0.0948617	1	1	Not associated
MSigDB Pathway	BIOCARTA_P53_PATHWAY	p53 Signaling Pathway	0.00221285	4.61282	1.30072	6	0.00153026	0.00705882	0.017231	3.84505	1.0403	4	16	0.00341006	0.25	1	1	Not associated
GO Cellular Component	GO:0033177	proton-transporting two-sector ATPase complex, proton-transporting domain	0.00223445	5.60794	0.891593	5	0.00104893	0.00588235	0.0585626	2.67482	1.49543	4	23	0.00341006	0.173913	1	1	Not associated
GO Biological Process	GO:0002764	immune response-regulating signaling pathway	0.00225006	1.51343	35.0197	53	0.0411997	0.0623529	0.00207549	1.59643	25.6823	41	395	0.0349531	0.103798	1	1	Not associated
GO Biological Process	GO:1901576	organic substance biosynthetic process	0.00225945	1.13438	300.606	341	0.353654	0.401176	0.00798272	1.12654	273.403	308	4205	0.262575	0.0732461	1	1	Not associated
GO Cellular Component	GO:0090544	BAF-type complex	0.00228919	3.96172	1.76691	7	0.00207872	0.00823529	0.0261297	3.41783	1.17033	4	18	0.00341006	0.222222	1	1	Not associated
GO Biological Process	GO:0031571	mitotic G1 DNA damage checkpoint	0.00229475	2.81904	3.90204	11	0.00459064	0.0129412	0.0536499	1.84563	4.87639	9	75	0.00767263	0.12	1	1	Not associated
MSigDB Pathway	PID_REG_GR_PATHWAY	Glucocorticoid receptor regulatory network	0.00230555	2.28502	7.00212	16	0.00823779	0.0188235	0.0395201	1.87564	5.33152	10	82	0.00852515	0.121951	1	1	Not associated
GO Biological Process	GO:0032006	regulation of TOR signaling cascade	0.00232216	2.99616	3.3376	10	0.00392659	0.0117647	0.0527506	2.19718	2.73078	6	42	0.00511509	0.142857	1	1	Not associated
GO Biological Process	GO:0030036	actin cytoskeleton organization	0.00236981	1.53843	31.8507	49	0.0374714	0.0576471	0.00459639	1.58793	22.0413	35	339	0.029838	0.103245	1	1	Not associated
GO Biological Process	GO:0070201	regulation of establishment of protein localization	0.00237957	1.50926	35.1165	53	0.0413135	0.0623529	0.0150406	1.45707	24.7071	36	380	0.0306905	0.0947368	1	1	Not associated
GO Molecular Function	GO:0030971	receptor tyrosine kinase binding	0.00238638	2.65893	4.5131	12	0.00530953	0.0141177	0.0306736	2.49409	2.40569	6	37	0.00511509	0.162162	1	1	Not associated
GO Biological Process	GO:0050764	regulation of phagocytosis	0.00241148	2.98023	3.35545	10	0.00394758	0.0117647	0.00507186	2.92957	2.73078	8	42	0.00682012	0.190476	1	1	Not associated
GO Biological Process	GO:0016192	vesicle-mediated transport	0.00242166	1.34039	70.8747	95	0.083382	0.111765	0.0233406	1.26152	57.8665	73	890	0.0622336	0.0820225	1	1	Not associated
GO Molecular Function	GO:0016462	pyrophosphatase activity	0.0024343	1.3856	57.0152	79	0.0670767	0.0929412	0.0358685	1.25121	51.9498	65	799	0.0554135	0.0813517	1	1	Not associated
GO Biological Process	GO:0016310	phosphorylation	0.00245776	1.30748	84.1313	110	0.098978	0.129412	0.00395631	1.33465	62.938	84	968	0.0716113	0.0867769	1	1	Not associated
GO Biological Process	GO:0030029	actin filament-based process	0.00247253	1.5064	35.1831	53	0.0413919	0.0623529	0.00599511	1.52997	24.8371	38	382	0.0323956	0.0994764	1	1	Not associated
GO Molecular Function	GO:0004861	cyclin-dependent protein serine/threonine kinase inhibitor activity	0.00247677	7.25321	0.55148	4	0.000648799	0.00470588	0.0387552	3.84505	0.780223	3	12	0.00255755	0.25	1	1	Not associated
GO Molecular Function	GO:0008603	cAMP-dependent protein kinase regulator activity	0.00249052	7.24197	0.552336	4	0.000649807	0.00470588	0.112172	3.41783	0.585167	2	9	0.00170503	0.222222	1	1	Not associated
GO Biological Process	GO:0010740	positive regulation of intracellular protein kinase cascade	0.00249685	1.40549	51.9394	73	0.0611051	0.0858823	3.98485e-05	1.71549	33.8097	58	520	0.0494459	0.111538	1	0.0687386	Not associated
GO Molecular Function	GO:0016741	transferase activity, transferring one-carbon groups	0.00251076	1.826	14.7864	27	0.0173958	0.0317647	0.0557975	1.46478	13.6539	20	210	0.0170503	0.0952381	1	1	Not associated
GO Biological Process	GO:0070887	cellular response to chemical stimulus	0.00251533	1.21125	155.212	188	0.182602	0.221176	5.91995e-05	1.33669	121.195	162	1864	0.138107	0.0869099	1	0.102119	Not associated
GO Biological Process	GO:0031440	regulation of mRNA 3'-end processing	0.00251867	4.4927	1.3355	6	0.00157118	0.00705882	0.021398	3.61888	1.10532	4	17	0.00341006	0.235294	1	1	Not associated
MSigDB Pathway	BIOCARTA_41BB_PATHWAY	The 4-1BB-dependent immune response	0.00252185	4.49153	1.33585	6	0.00157158	0.00705882	0.021398	3.61888	1.10532	4	17	0.00341006	0.235294	1	1	Not associated
GO Biological Process	GO:1901068	guanosine-containing compound metabolic process	0.00254612	1.78037	16.2888	29	0.0191632	0.0341176	0.0438786	1.44755	16.5797	24	255	0.0204604	0.0941176	1	1	Not associated
GO Biological Process	GO:0061515	myeloid cell development	0.00254906	3.47755	2.30047	8	0.00270643	0.00941177	0.0135006	2.97682	2.01558	6	31	0.00511509	0.193548	1	1	Not associated
MSigDB Pathway	REACTOME_PRE_NOTCH_EXPRESSION_AND_PROCESSING	Genes involved in Pre-NOTCH Expression and Processing	0.002583	2.95135	3.38828	10	0.00398621	0.0117647	0.0527506	2.19718	2.73078	6	42	0.00511509	0.142857	1	1	Not associated
GO Biological Process	GO:0006103	2-oxoglutarate metabolic process	0.00258433	4.4691	1.34255	6	0.00157947	0.00705882	0.0814271	2.88379	1.0403	3	16	0.00255755	0.1875	1	1	Not associated
GO Biological Process	GO:0051954	positive regulation of amine transport	0.00262145	3.8651	1.81108	7	0.00213068	0.00823529	0.0078541	3.84505	1.30037	5	20	0.00426258	0.25	1	1	Not associated
GO Biological Process	GO:0033327	Leydig cell differentiation	0.00262205	4.45587	1.34654	6	0.00158416	0.00705882	0.00577053	5.12674	0.780223	4	12	0.00341006	0.333333	1	1	Not associated
GO Molecular Function	GO:0000166	nucleotide binding	0.00263903	1.19304	176.858	211	0.208069	0.248235	0.0892906	1.10286	150.518	166	2315	0.141517	0.0717063	1	1	Not associated
GO Molecular Function	GO:0016818	hydrolase activity, acting on acid anhydrides, in phosphorus-containing anhydrides	0.00264659	1.38107	57.202	79	0.0672964	0.0929412	0.038283	1.24653	52.1449	65	802	0.0554135	0.0810474	1	1	Not associated
MSigDB Pathway	REACTOME_INSULIN_RECEPTOR_RECYCLING	Genes involved in Insulin receptor recycling	0.00264998	5.38802	0.927984	5	0.00109175	0.00588235	0.0585626	2.67482	1.49543	4	23	0.00341006	0.173913	1	1	Not associated
GO Biological Process	GO:0009725	response to hormone stimulus	0.0026803	1.35627	64.1465	87	0.0754665	0.102353	0.00116073	1.4596	45.9031	67	706	0.0571185	0.0949008	1	1	Not associated
GO Biological Process	GO:0046578	regulation of Ras protein signal transduction	0.00268325	1.48756	36.9732	55	0.0434979	0.0647059	8.95843e-05	1.83199	23.4717	43	361	0.0366581	0.119114	1	0.154533	Not associated
GO Molecular Function	GO:1901265	nucleoside phosphate binding	0.00269741	1.19249	176.94	211	0.208165	0.248235	0.0902573	1.10238	150.583	166	2316	0.141517	0.0716753	1	1	Not associated
GO Cellular Component	GO:0005739	mitochondrion	0.0026979	1.27524	99.5887	127	0.117163	0.149412	0.521267	0.998842	103.12	103	1586	0.087809	0.0649432	1	1	Not associated
GO Biological Process	GO:0034976	response to endoplasmic reticulum stress	0.00270767	2.18404	7.78374	17	0.00915734	0.02	0.00823813	1.93767	8.25736	16	127	0.0136402	0.125984	1	1	Not associated
GO Biological Process	GO:0008219	cell death	0.00272156	1.27641	98.7146	126	0.116135	0.148235	0.00704833	1.26924	80.3629	102	1236	0.0869565	0.0825243	1	1	Not associated
GO Cellular Component	GO:0016514	SWI/SNF complex	0.00272632	4.42039	1.35735	6	0.00159688	0.00705882	0.0693903	3.07604	0.975279	3	15	0.00255755	0.2	1	1	Not associated
GO Biological Process	GO:1901988	negative regulation of cell cycle phase transition	0.00279292	1.91922	11.984	23	0.0140988	0.0270588	0.0464248	1.55633	10.9231	17	168	0.0144928	0.101191	1	1	Not associated
GO Molecular Function	GO:0016817	hydrolase activity, acting on acid anhydrides	0.00279292	1.37815	57.3232	79	0.0674391	0.0929412	0.0425852	1.2388	52.47	65	807	0.0554135	0.0805452	1	1	Not associated
GO Biological Process	GO:0031060	regulation of histone methylation	0.00279464	3.13725	2.86876	9	0.00337501	0.0105882	0.16419	1.86427	2.14561	4	33	0.00341006	0.121212	1	1	Not associated
GO Biological Process	GO:0044764	multi-organism cellular process	0.00281432	1.4841	37.0595	55	0.0435994	0.0647059	0.375785	1.05723	39.7263	42	611	0.0358056	0.0687398	1	1	Not associated
GO Biological Process	GO:0044783	G1 DNA damage checkpoint	0.00285496	2.73832	4.01706	11	0.00472596	0.0129412	0.0575102	1.82134	4.94141	9	76	0.00767263	0.118421	1	1	Not associated
GO Biological Process	GO:0060213	positive regulation of nuclear-transcribed mRNA poly(A) tail shortening	0.0028727	5.28648	0.945809	5	0.00111272	0.00588235	0.023294	4.61407	0.650186	3	10	0.00255755	0.3	1	1	Not associated
MSigDB Pathway	REACTOME_MITOCHONDRIAL_PROTEIN_IMPORT	Genes involved in Mitochondrial Protein Import	0.00288161	3.40733	2.34788	8	0.00276221	0.00941177	0.128163	1.74116	3.44598	6	53	0.00511509	0.113208	1	1	Not associated
MSigDB Pathway	BIOCARTA_IGF1R_PATHWAY	Multiple antiapoptotic pathways from IGF-1R signaling lead to BAD phosphorylation	0.00289392	3.40491	2.34955	8	0.00276418	0.00941177	0.0145011	3.34353	1.49543	5	23	0.00426258	0.217391	1	1	Not associated
MSigDB Pathway	SIG_IL4RECEPTOR_IN_B_LYPHOCYTES	Genes related to IL4 rceptor signaling in B lymphocytes	0.00289472	3.12034	2.8843	9	0.00339329	0.0105882	0.0948607	2.27855	1.7555	4	27	0.00341006	0.148148	1	1	Not associated
GO Biological Process	GO:0006399	tRNA metabolic process	0.0029116	2.23027	7.17403	16	0.00844003	0.0188235	0.80089	0.780156	8.97256	7	138	0.0059676	0.0507246	1	1	Not associated
GO Biological Process	GO:0051704	multi-organism process	0.00293535	1.28605	91.7536	118	0.107945	0.138823	0.126028	1.11856	89.4005	100	1375	0.0852515	0.0727273	1	1	Not associated
MSigDB Pathway	REACTOME_PLC_BETA_MEDIATED_EVENTS	Genes involved in PLC beta mediated events	0.0029355	2.59061	4.63212	12	0.00544955	0.0141177	0.00507186	2.92957	2.73078	8	42	0.00682012	0.190476	1	1	Not associated
MSigDB Pathway	REACTOME_PYRUVATE_METABOLISM_AND_CITRIC_ACID_TCA_CYCLE	Genes involved in Pyruvate metabolism and Citric Acid (TCA) cycle	0.00296649	3.10861	2.89518	9	0.0034061	0.0105882	0.26098	1.53802	2.60074	4	40	0.00341006	0.1	1	1	Not associated
GO Biological Process	GO:0032020	ISG15-protein conjugation	0.00300373	6.87039	0.582209	4	0.000684952	0.00470588	0.331975	2.56337	0.390111	1	6	0.000852515	0.166667	1	1	Not associated
GO Cellular Component	GO:0031966	mitochondrial membrane	0.00307742	1.52507	31.474	48	0.0370282	0.0564706	0.143381	1.18755	34.5249	41	531	0.0349531	0.0772128	1	1	Not associated
GO Biological Process	GO:0016265	death	0.00310775	1.27137	99.1057	126	0.116595	0.148235	0.00753997	1.26617	80.558	102	1239	0.0869565	0.0823245	1	1	Not associated
GO Biological Process	GO:0007009	plasma membrane organization	0.00314733	2.09735	8.58225	18	0.0100968	0.0211765	0.0478034	1.70891	7.02201	12	108	0.0102302	0.111111	1	1	Not associated
GO Biological Process	GO:0033619	membrane protein proteolysis	0.00319009	3.72819	1.87759	7	0.00220893	0.00823529	0.116167	2.12141	1.88554	4	29	0.00341006	0.137931	1	1	Not associated
GO Biological Process	GO:2001252	positive regulation of chromosome organization	0.0032035	2.56206	4.68374	12	0.00551028	0.0141177	0.235768	1.50787	3.31595	5	51	0.00426258	0.0980392	1	1	Not associated
GO Biological Process	GO:0060964	regulation of gene silencing by miRNA	0.00321364	6.74057	0.593421	4	0.000698143	0.00470588	0.0171214	5.12674	0.585167	3	9	0.00255755	0.333333	1	1	Not associated
GO Molecular Function	GO:0035586	purinergic receptor activity	0.00325313	5.13309	0.974073	5	0.00114597	0.00588235	0.0668032	2.56337	1.56045	4	24	0.00341006	0.166667	1	1	Not associated
GO Biological Process	GO:0010799	regulation of peptidyl-threonine phosphorylation	0.00326092	3.06354	2.93778	9	0.00345621	0.0105882	0.00976654	3.66196	1.36539	5	21	0.00426258	0.238095	1	1	Not associated
MSigDB Pathway	REACTOME_DESTABILIZATION_OF_MRNA_BY_AUF1_HNRNP_D0	Genes involved in Destabilization of mRNA by AUF1 (hnRNP D0)	0.00329823	3.33111	2.4016	8	0.00282541	0.00941177	0.128163	1.74116	3.44598	6	53	0.00511509	0.113208	1	1	Not associated
GO Biological Process	GO:0043467	regulation of generation of precursor metabolites and energy	0.00330809	2.44147	5.32467	13	0.00626432	0.0152941	0.0395345	2.0507	3.90111	8	60	0.00682012	0.133333	1	1	Not associated
GO Molecular Function	GO:0017111	nucleoside-triphosphatase activity	0.00331642	1.38198	54.2699	75	0.0638469	0.0882353	0.0387085	1.25305	49.4791	62	761	0.0528559	0.0814717	1	1	Not associated
GO Biological Process	GO:0019538	protein metabolic process	0.00331768	1.14664	252.914	290	0.297546	0.341176	0.208369	1.04875	227.89	239	3505	0.203751	0.0681883	1	1	Not associated
GO Biological Process	GO:0009141	nucleoside triphosphate metabolic process	0.00332798	1.53438	29.9796	46	0.0352701	0.0541177	0.010943	1.4346	29.9736	43	461	0.0366581	0.0932755	1	1	Not associated
GO Biological Process	GO:0006879	cellular iron ion homeostasis	0.00339923	2.67476	4.11252	11	0.00483826	0.0129412	0.0313338	2.03562	4.42126	9	68	0.00767263	0.132353	1	1	Not associated
GO Biological Process	GO:0050820	positive regulation of coagulation	0.0034506	4.21069	1.42495	6	0.00167641	0.00705882	0.0438227	2.92957	1.36539	4	21	0.00341006	0.190476	1	1	Not associated
GO Biological Process	GO:0046039	GTP metabolic process	0.00346646	1.76087	15.9012	28	0.0187073	0.0329412	0.0526507	1.43217	16.0596	23	247	0.0196078	0.0931174	1	1	Not associated
GO Biological Process	GO:0044255	cellular lipid metabolic process	0.00354106	1.35611	60.4672	82	0.0711379	0.0964706	0.0426704	1.23641	53.3802	66	821	0.056266	0.0803898	1	1	Not associated
GO Biological Process	GO:0051693	actin filament capping	0.00358051	4.17849	1.43592	6	0.00168932	0.00705882	0.0756099	2.46083	1.62546	4	25	0.00341006	0.16	1	1	Not associated
MSigDB Pathway	REACTOME_METABOLISM_OF_MRNA	Genes involved in Metabolism of mRNA	0.00361445	2.02269	9.39343	19	0.0110511	0.0223529	0.317775	1.14992	13.914	16	214	0.0136402	0.0747664	1	1	Not associated
GO Biological Process	GO:0030099	myeloid cell differentiation	0.00362876	1.77584	15.2041	27	0.0178872	0.0317647	0.0123453	1.74985	10.8581	19	167	0.0161978	0.113772	1	1	Not associated
GO Biological Process	GO:0043406	positive regulation of MAP kinase activity	0.00364334	1.65344	20.5632	34	0.024192	0.04	0.000124066	2.16284	12.4836	27	192	0.0230179	0.140625	1	0.214013	Not associated
GO Biological Process	GO:0035710	CD4-positive, alpha-beta T cell activation	0.00365438	3.274	2.44349	8	0.0028747	0.00941177	0.20242	1.92253	1.56045	3	24	0.00255755	0.125	1	1	Not associated
GO Biological Process	GO:0007096	regulation of exit from mitosis	0.00368833	6.48243	0.617052	4	0.000725944	0.00470588	0.0480085	3.54928	0.845241	3	13	0.00255755	0.230769	1	1	Not associated
GO Biological Process	GO:0046173	polyol biosynthetic process	0.00370959	3.62537	1.93084	7	0.00227158	0.00823529	0.0145011	3.34353	1.49543	5	23	0.00426258	0.217391	1	1	Not associated
MSigDB Pathway	REACTOME_MTORC1_MEDIATED_SIGNALLING	Genes involved in mTORC1-mediated signalling	0.00372192	6.46575	0.618644	4	0.000727817	0.00470588	0.157476	2.7964	0.715204	2	11	0.00170503	0.181818	1	1	Not associated
GO Molecular Function	GO:0043014	alpha-tubulin binding	0.00384158	4.11771	1.45712	6	0.00171426	0.00705882	0.0119758	3.49551	1.43041	5	22	0.00426258	0.227273	1	1	Not associated
GO Biological Process	GO:0034341	response to interferon-gamma	0.00384897	2.1654	7.38892	16	0.00869285	0.0188235	0.028716	1.84563	6.50186	12	100	0.0102302	0.12	1	1	Not associated
GO Biological Process	GO:0007346	regulation of mitotic cell cycle	0.00387545	1.55585	26.9949	42	0.0317587	0.0494118	0.0347372	1.41536	21.196	30	326	0.0255754	0.0920245	1	1	Not associated
GO Molecular Function	GO:0004445	inositol-polyphosphate 5-phosphatase activity	0.00389254	9.71224	0.308888	3	0.000363398	0.00352941	0.0712839	4.39435	0.45513	2	7	0.00170503	0.285714	1	1	Not associated
GO Biological Process	GO:0009144	purine nucleoside triphosphate metabolic process	0.00389495	1.53749	28.6181	44	0.0336683	0.0517647	0.0138791	1.42667	28.7382	41	442	0.0349531	0.0927602	1	1	Not associated
MSigDB Pathway	REACTOME_SCFSKP2_MEDIATED_DEGRADATION_OF_P27_P21	Genes involved in SCF(Skp2)-mediated degradation of p27/p21	0.00389855	3.23832	2.47042	8	0.00290637	0.00941177	0.0696626	1.92253	3.64104	7	56	0.0059676	0.125	1	1	Not associated
GO Biological Process	GO:0006890	retrograde vesicle-mediated transport, Golgi to ER	0.00390628	4.91405	1.01749	5	0.00119705	0.00588235	0.0145011	3.34353	1.49543	5	23	0.00426258	0.217391	1	1	Not associated
GO Biological Process	GO:0006892	post-Golgi vesicle-mediated transport	0.00391245	2.39216	5.43441	13	0.00639343	0.0152941	0.385117	1.19846	5.00643	6	77	0.00511509	0.0779221	1	1	Not associated
GO Biological Process	GO:0051952	regulation of amine transport	0.00391282	2.30342	6.07793	14	0.00715051	0.0164706	0.0457914	2.11101	3.31595	7	51	0.0059676	0.137255	1	1	Not associated
GO Biological Process	GO:0043094	cellular metabolic compound salvage	0.00394326	3.58431	1.95295	7	0.00229759	0.00823529	0.0478096	2.48068	2.01558	5	31	0.00426258	0.16129	1	1	Not associated
GO Biological Process	GO:0009199	ribonucleoside triphosphate metabolic process	0.00395518	1.53613	28.6434	44	0.0336981	0.0517647	0.0143683	1.42345	28.8032	41	443	0.0349531	0.0925508	1	1	Not associated
MSigDB Pathway	SA_MMP_CYTOKINE_CONNECTION	Cytokines can induce activation of matrix metalloproteinases, which degrade extracellular matrix.	0.00396793	4.89566	1.02131	5	0.00120155	0.00588235	0.00199601	5.12674	0.975279	5	15	0.00426258	0.333333	1	1	Not associated
GO Biological Process	GO:0010647	positive regulation of cell communication	0.00397681	1.2754	91.7358	117	0.107925	0.137647	0.000153682	1.47275	59.7521	88	919	0.0750213	0.0957563	1	0.265102	Not associated
GO Biological Process	GO:0051957	positive regulation of amino acid transport	0.00399472	4.88777	1.02296	5	0.00120348	0.00588235	0.0171214	5.12674	0.585167	3	9	0.00255755	0.333333	1	1	Not associated
GO Molecular Function	GO:0090484	drug transporter activity	0.00399713	4.88707	1.02311	5	0.00120366	0.00588235	0.00070206	5.12674	1.17033	6	18	0.00511509	0.333333	1	1	Not associated
GO Cellular Component	GO:0035253	ciliary rootlet	0.0039997	4.88631	1.02327	5	0.00120384	0.00588235	0.157476	2.7964	0.715204	2	11	0.00170503	0.181818	1	1	Not associated
GO Cellular Component	GO:0048471	perinuclear region of cytoplasm	0.00401478	1.43661	41.0688	59	0.0483162	0.0694118	0.0910444	1.24285	32.1842	40	495	0.0341006	0.0808081	1	1	Not associated
MSigDB Pathway	REACTOME_TRANSFERRIN_ENDOCYTOSIS_AND_RECYCLING	Genes involved in Transferrin endocytosis and recycling	0.00401853	4.88082	1.02442	5	0.0012052	0.00588235	0.0756099	2.46083	1.62546	4	25	0.00341006	0.16	1	1	Not associated
GO Biological Process	GO:0046916	cellular transition metal ion homeostasis	0.00406864	2.38072	5.46052	13	0.00642415	0.0152941	0.0360861	1.83894	5.98171	11	92	0.00937766	0.119565	1	1	Not associated
GO Biological Process	GO:1902105	regulation of leukocyte differentiation	0.00409931	1.70185	17.6279	30	0.0207387	0.0352941	0.00146841	1.93259	12.4185	24	191	0.0204604	0.125655	1	1	Not associated
GO Biological Process	GO:0043065	positive regulation of apoptotic process	0.0041162	1.47423	35.2727	52	0.0414973	0.0611765	0.000243032	1.79361	22.3014	40	343	0.0341006	0.116618	1	0.41923	Not associated
GO Cellular Component	GO:0005884	actin filament	0.00413041	2.37633	5.47063	13	0.00643603	0.0152941	0.0395345	2.0507	3.90111	8	60	0.00682012	0.133333	1	1	Not associated
MSigDB Pathway	BIOCARTA_TOLL_PATHWAY	Toll-Like Receptor Pathway	0.00413823	2.95185	3.04894	9	0.00358698	0.0105882	0.0271421	2.56337	2.34067	6	36	0.00511509	0.166667	1	1	Not associated
GO Biological Process	GO:0044773	mitotic DNA damage checkpoint	0.00414259	2.47894	4.84077	12	0.00569503	0.0141177	0.0395201	1.87564	5.33152	10	82	0.00852515	0.121951	1	1	Not associated
GO Biological Process	GO:0044281	small molecule metabolic process	0.00416421	1.18718	170.152	202	0.200178	0.237647	0.150365	1.07731	157.8	170	2427	0.144927	0.0700453	1	1	Not associated
GO Biological Process	GO:0016032	viral process	0.00417348	1.46103	36.9601	54	0.0434825	0.0635294	0.431264	1.03545	39.5963	41	609	0.0349531	0.0673235	1	1	Not associated
GO Molecular Function	GO:0031624	ubiquitin conjugating enzyme binding	0.00417414	6.25793	0.639189	4	0.000751987	0.00470588	0.0910495	3.84505	0.520149	2	8	0.00170503	0.25	1	1	Not associated
GO Cellular Component	GO:0005758	mitochondrial intermembrane space	0.00417868	3.54565	1.97425	7	0.00232265	0.00823529	0.455032	1.16077	3.44598	4	53	0.00341006	0.0754717	1	1	Not associated
MSigDB Pathway	REACTOME_REGULATION_OF_MRNA_STABILITY_BY_PROTEINS_THAT_BIND_AU_RICH_ELEMENTS	Genes involved in Regulation of mRNA Stability by Proteins that Bind AU-rich Elements	0.00419785	2.59895	4.23248	11	0.00497939	0.0129412	0.0947611	1.64788	5.46156	9	84	0.00767263	0.107143	1	1	Not associated
GO Biological Process	GO:0007264	small GTPase mediated signal transduction	0.00427024	1.45357	37.8378	55	0.0445151	0.0647059	0.00277721	1.55246	27.6979	43	426	0.0366581	0.100939	1	1	Not associated
GO Biological Process	GO:0006826	iron ion transport	0.00427839	2.93644	3.06494	9	0.00360581	0.0105882	0.0417522	2.15323	3.25093	7	50	0.0059676	0.14	1	1	Not associated
GO Biological Process	GO:0032481	positive regulation of type I interferon production	0.00434824	2.58641	4.253	11	0.00500353	0.0129412	0.021048	2.07841	4.81137	10	74	0.00852515	0.135135	1	1	Not associated
GO Biological Process	GO:0043648	dicarboxylic acid metabolic process	0.00435264	2.27489	6.15413	14	0.00724015	0.0164706	0.0843786	1.68807	5.33152	9	82	0.00767263	0.109756	1	1	Not associated
GO Molecular Function	GO:0005070	SH3/SH2 adaptor activity	0.00436754	2.36007	5.50831	13	0.00648037	0.0152941	0.0417522	2.15323	3.25093	7	50	0.0059676	0.14	1	1	Not associated
MSigDB Pathway	REACTOME_CELL_CYCLE	Genes involved in Cell Cycle	0.00441838	1.59487	23.1994	37	0.0272934	0.0435294	0.38027	1.07126	26.1375	28	402	0.0238704	0.0696517	1	1	Not associated
GO Biological Process	GO:0048821	erythrocyte development	0.00445996	3.99101	1.50338	6	0.00176868	0.00705882	0.0668032	2.56337	1.56045	4	24	0.00341006	0.166667	1	1	Not associated
GO Biological Process	GO:0032464	positive regulation of protein homooligomerization	0.0044808	6.13235	0.652278	4	0.000767386	0.00470588	0.0171214	5.12674	0.585167	3	9	0.00255755	0.333333	1	1	Not associated
MSigDB Pathway	BIOCARTA_IL1R_PATHWAY	Signal transduction through IL1R	0.00450667	3.15927	2.53223	8	0.0029791	0.00941177	0.053751	2.40316	2.08059	5	32	0.00426258	0.15625	1	1	Not associated
GO Molecular Function	GO:0030291	protein serine/threonine kinase inhibitor activity	0.00453307	3.15611	2.53477	8	0.00298208	0.00941177	0.0241393	2.95774	1.69048	5	26	0.00426258	0.192308	1	1	Not associated
GO Biological Process	GO:0015711	organic anion transport	0.00454232	1.58089	24.0372	38	0.028279	0.0447059	0.0371518	1.42598	19.6356	28	302	0.0238704	0.0927152	1	1	Not associated
MSigDB Pathway	REACTOME_INNATE_IMMUNE_SYSTEM	Genes involved in Innate Immune System	0.00459207	1.70523	17.0065	29	0.0200077	0.0341176	0.0743039	1.36713	17.555	24	270	0.0204604	0.0888889	1	1	Not associated
GO Biological Process	GO:0044774	mitotic DNA integrity checkpoint	0.00459295	2.44595	4.90608	12	0.00577186	0.0141177	0.0486721	1.80944	5.52658	10	85	0.00852515	0.117647	1	1	Not associated
PANTHER Pathway	P00055	Transcription regulation by bZIP transcription factor	0.00459391	3.48311	2.0097	7	0.00236435	0.00823529	0.177129	1.67176	2.99085	5	46	0.00426258	0.108696	1	1	Not associated
GO Molecular Function	GO:0001848	complement binding	0.00459745	9.14504	0.328047	3	0.000385937	0.00352941	0.454033	1.70891	0.585167	1	9	0.000852515	0.111111	1	1	Not associated
MSigDB Pathway	REACTOME_NRIF_SIGNALS_CELL_DEATH_FROM_THE_NUCLEUS	Genes involved in NRIF signals cell death from the nucleus	0.00459879	6.08686	0.657154	4	0.000773122	0.00470588	0.0105134	4.39435	0.91026	4	14	0.00341006	0.285714	1	1	Not associated
GO Biological Process	GO:1901699	cellular response to nitrogen compound	0.0046509	1.44726	38.0027	55	0.0447091	0.0647059	0.00924543	1.47179	27.1778	40	418	0.0341006	0.0956938	1	1	Not associated
GO Cellular Component	GO:0005741	mitochondrial outer membrane	0.00466854	2.01699	8.92418	18	0.010499	0.0211765	0.0324969	1.72259	8.12732	14	125	0.0119352	0.112	1	1	Not associated
GO Biological Process	GO:0090330	regulation of platelet aggregation	0.00473974	3.94021	1.52276	6	0.00179149	0.00705882	0.00271871	6.15209	0.650186	4	10	0.00341006	0.4	1	1	Not associated
MSigDB Pathway	REACTOME_TRANSCRIPTIONAL_ACTIVITY_OF_SMAD2_SMAD3_SMAD4_HETEROTRIMER	Genes involved in Transcriptional activity of SMAD2/SMAD3:SMAD4 heterotrimer	0.00474601	2.88875	3.11554	9	0.00366534	0.0105882	0.0271421	2.56337	2.34067	6	36	0.00511509	0.166667	1	1	Not associated
MSigDB Pathway	REACTOME_REGULATED_PROTEOLYSIS_OF_P75NTR	Genes involved in Regulated proteolysis of p75NTR	0.00477824	9.018	0.332668	3	0.000391374	0.00352941	0.134391	3.07604	0.650186	2	10	0.00170503	0.2	1	1	Not associated
GO Biological Process	GO:0031329	regulation of cellular catabolic process	0.0047795	1.34279	60.3221	81	0.0709672	0.0952941	0.00606434	1.40268	40.6366	57	625	0.0485934	0.0912	1	1	Not associated
GO Biological Process	GO:0006536	glutamate metabolic process	0.00479833	3.12546	2.55963	8	0.00301132	0.00941177	0.0849682	2.36619	1.69048	4	26	0.00341006	0.153846	1	1	Not associated
GO Biological Process	GO:0051056	regulation of small GTPase mediated signal transduction	0.00480026	1.40569	44.8179	63	0.052727	0.0741176	9.92351e-05	1.73592	28.8032	50	443	0.0426257	0.112867	1	0.171181	Not associated
MSigDB Pathway	BIOCARTA_IL6_PATHWAY	IL 6 signaling pathway	0.00480316	3.92917	1.52704	6	0.00179652	0.00705882	0.0508998	2.7964	1.43041	4	22	0.00341006	0.181818	1	1	Not associated
GO Biological Process	GO:0010605	negative regulation of macromolecule metabolic process	0.00482798	1.20877	138.985	168	0.163511	0.197647	0.000317442	1.34057	96.2275	129	1480	0.109974	0.0871622	1	0.547588	Not associated
GO Biological Process	GO:0009205	purine ribonucleoside triphosphate metabolic process	0.00483558	1.5267	28.1654	43	0.0331357	0.0505882	0.0182138	1.4078	28.4131	40	437	0.0341006	0.0915332	1	1	Not associated
MSigDB Pathway	BIOCARTA_IL17_PATHWAY	IL 17 Signaling Pathway	0.00486285	4.66182	1.07254	5	0.00126181	0.00588235	0.0693903	3.07604	0.975279	3	15	0.00255755	0.2	1	1	Not associated
GO Molecular Function	GO:0036094	small molecule binding	0.0048758	1.1679	194.365	227	0.228665	0.267059	0.138433	1.07847	166.903	180	2567	0.153453	0.0701208	1	1	Not associated
GO Biological Process	GO:0045579	positive regulation of B cell differentiation	0.00488252	5.98316	0.668543	4	0.000786521	0.00470588	0.00271871	6.15209	0.650186	4	10	0.00341006	0.4	1	1	Not associated
GO Biological Process	GO:0010948	negative regulation of cell cycle process	0.00489049	1.71553	16.3215	28	0.0192018	0.0329412	0.0702588	1.4241	14.044	20	216	0.0170503	0.0925926	1	1	Not associated
MSigDB Pathway	ST_T_CELL_SIGNAL_TRANSDUCTION	T Cell Signal Transduction	0.00491558	2.68878	3.71915	10	0.00437548	0.0117647	0.0696716	2.0507	2.92584	6	45	0.00511509	0.133333	1	1	Not associated
MSigDB Pathway	REACTOME_IMMUNOREGULATORY_INTERACTIONS_BETWEEN_A_LYMPHOID_AND_A_NON_LYMPHOID_CELL	Genes involved in Immunoregulatory interactions between a Lymphoid and a non-Lymphoid cell	0.004984	3.1051	2.5764	8	0.00303106	0.00941177	0.767175	0.756404	3.96613	3	61	0.00255755	0.0491803	1	1	Not associated
GO Biological Process	GO:0090002	establishment of protein localization to plasma membrane	0.00502399	2.86277	3.1438	9	0.00369859	0.0105882	0.0580806	2.14608	2.7958	6	43	0.00511509	0.139535	1	1	Not associated
MSigDB Pathway	KEGG_FC_GAMMA_R_MEDIATED_PHAGOCYTOSIS	Fc gamma R-mediated phagocytosis	0.00504015	2.0493	8.29551	17	0.00975942	0.02	0.00357809	2.24295	6.24178	14	96	0.0119352	0.145833	1	1	Not associated
GO Cellular Component	GO:0005861	troponin complex	0.00505147	19.2124	0.1041	2	0.00012247	0.00235294	0.416048	1.92253	0.520149	1	8	0.000852515	0.125	1	1	Not associated
GO Biological Process	GO:0031442	positive regulation of mRNA 3'-end processing	0.00509992	4.6084	1.08498	5	0.00127644	0.00588235	0.0693903	3.07604	0.975279	3	15	0.00255755	0.2	1	1	Not associated
MSigDB Pathway	BIOCARTA_CERAMIDE_PATHWAY	Ceramide Signaling Pathway	0.00513562	3.87396	1.5488	6	0.00182212	0.00705882	0.0119758	3.49551	1.43041	5	22	0.00426258	0.227273	1	1	Not associated
GO Molecular Function	GO:0004550	nucleoside diphosphate kinase activity	0.00514762	4.59801	1.08743	5	0.00127932	0.00588235	0.0314395	3.23794	1.23535	4	19	0.00341006	0.210526	1	1	Not associated
GO Biological Process	GO:0006165	nucleoside diphosphate phosphorylation	0.00514762	4.59801	1.08743	5	0.00127932	0.00588235	0.0314395	3.23794	1.23535	4	19	0.00341006	0.210526	1	1	Not associated
GO Biological Process	GO:0042110	T cell activation	0.00516849	1.67316	17.9302	30	0.0210943	0.0352941	0.00712123	1.78445	11.7684	21	181	0.0179028	0.116022	1	1	Not associated
MSigDB Pathway	REACTOME_NRAGE_SIGNALS_DEATH_THROUGH_JNK	Genes involved in NRAGE signals death through JNK	0.00521062	2.40588	4.98778	12	0.00586798	0.0141177	0.0198822	2.50376	2.7958	7	43	0.0059676	0.162791	1	1	Not associated
GO Biological Process	GO:0000288	nuclear-transcribed mRNA catabolic process, deadenylation-dependent decay	0.00522227	2.84519	3.16323	9	0.00372145	0.0105882	0.0593708	1.99373	3.511	7	54	0.0059676	0.12963	1	1	Not associated
GO Biological Process	GO:0035307	positive regulation of protein dephosphorylation	0.00524509	4.57713	1.09239	5	0.00128516	0.00588235	0.0136106	4.10139	0.975279	4	15	0.00341006	0.266667	1	1	Not associated
GO Biological Process	GO:0031056	regulation of histone modification	0.00524539	2.09419	7.64019	16	0.00898846	0.0188235	0.105854	1.60956	5.5916	9	86	0.00767263	0.104651	1	1	Not associated
MSigDB Pathway	PID_RXR_VDR_PATHWAY	RXR and RAR heterodimerization with other nuclear receptor	0.00524601	3.39677	2.06078	7	0.00242445	0.00823529	0.0241393	2.95774	1.69048	5	26	0.00426258	0.192308	1	1	Not associated
GO Biological Process	GO:1901700	response to oxygen-containing compound	0.00527273	1.26376	92.5806	117	0.108918	0.137647	0.000388458	1.41035	67.3592	95	1036	0.0809889	0.0916988	1	0.67009	Not associated
GO Biological Process	GO:0030968	endoplasmic reticulum unfolded protein response	0.00534274	2.51367	4.37607	11	0.00514831	0.0129412	0.0486721	1.80944	5.52658	10	85	0.00852515	0.117647	1	1	Not associated
GO Cellular Component	GO:0031965	nuclear membrane	0.00540775	1.68434	17.2175	29	0.0202558	0.0341176	0.0755636	1.42548	13.3288	19	205	0.0161978	0.0926829	1	1	Not associated
GO Biological Process	GO:0050730	regulation of peptidyl-tyrosine phosphorylation	0.00543043	1.66703	17.9961	30	0.0211719	0.0352941	0.00180494	1.96724	11.1832	22	172	0.0187553	0.127907	1	1	Not associated
GO Biological Process	GO:0071902	positive regulation of protein serine/threonine kinase activity	0.00544141	1.55248	25.1211	39	0.0295542	0.0458824	0.000215427	1.97837	15.6695	31	241	0.026428	0.128631	1	0.371612	Not associated
GO Biological Process	GO:0023056	positive regulation of signaling	0.00546942	1.26375	91.7899	116	0.107988	0.136471	0.000219981	1.46079	59.557	87	916	0.0741688	0.0949782	1	0.379468	Not associated
GO Cellular Component	GO:0031093	platelet alpha granule lumen	0.00547676	2.50499	4.39123	11	0.00516615	0.0129412	0.011503	2.56337	3.12089	8	48	0.00682012	0.166667	1	1	Not associated
GO Biological Process	GO:0035587	purinergic receptor signaling pathway	0.00559379	4.50607	1.10962	5	0.00130543	0.00588235	0.0849682	2.36619	1.69048	4	26	0.00341006	0.153846	1	1	Not associated
GO Cellular Component	GO:0030672	synaptic vesicle membrane	0.00561221	2.38244	5.03685	12	0.0059257	0.0141177	0.211654	1.56941	3.18591	5	49	0.00426258	0.102041	1	1	Not associated
MSigDB Pathway	REACTOME_SIGNALING_BY_NOTCH	Genes involved in Signaling by NOTCH	0.0056256	1.90046	10.5238	20	0.0123809	0.0235294	0.00519626	2.15323	6.50186	14	100	0.0119352	0.14	1	1	Not associated
GO Molecular Function	GO:0019865	immunoglobulin binding	0.00562761	5.74317	0.696479	4	0.000819387	0.00470588	0.017231	3.84505	1.0403	4	16	0.00341006	0.25	1	1	Not associated
MSigDB Pathway	BIOCARTA_EGFR_SMRTE_PATHWAY	Map Kinase Inactivation of SMRT Corepressor	0.00563373	3.79854	1.57955	6	0.0018583	0.00705882	0.030509	4.19461	0.715204	3	11	0.00255755	0.272727	1	1	Not associated
GO Biological Process	GO:0000165	MAPK cascade	0.00570546	1.61684	20.4102	33	0.024012	0.0388235	0.000489393	2.01963	12.8737	26	198	0.0221654	0.131313	1	0.844203	Not associated
GO Biological Process	GO:0043249	erythrocyte maturation	0.00574089	8.43522	0.355652	3	0.000418414	0.00352941	0.0387552	3.84505	0.780223	3	12	0.00255755	0.25	1	1	Not associated
GO Biological Process	GO:0072109	glomerular mesangium development	0.00574327	8.43394	0.355706	3	0.000418477	0.00352941	0.375423	2.19718	0.45513	1	7	0.000852515	0.142857	1	1	Not associated
MSigDB Pathway	REACTOME_LOSS_OF_NLP_FROM_MITOTIC_CENTROSOMES	Genes involved in Loss of Nlp from mitotic centrosomes	0.0057765	2.62506	3.80944	10	0.00448169	0.0117647	0.498214	1.09859	3.64104	4	56	0.00341006	0.0714286	1	1	Not associated
MSigDB Pathway	REACTOME_COPI_MEDIATED_TRANSPORT	Genes involved in COPI Mediated Transport	0.00578305	8.41271	0.356603	3	0.000419533	0.00352941	0.023294	4.61407	0.650186	3	10	0.00255755	0.3	1	1	Not associated
GO Biological Process	GO:0090382	phagosome maturation	0.00584087	3.02095	2.64817	8	0.0031155	0.00941177	0.0825004	1.96343	3.05587	6	47	0.00511509	0.12766	1	1	Not associated
GO Biological Process	GO:0000302	response to reactive oxygen species	0.00585945	1.97102	9.13232	18	0.0107439	0.0211765	0.00952759	1.90762	8.38739	16	129	0.0136402	0.124031	1	1	Not associated
GO Cellular Component	GO:0044455	mitochondrial membrane part	0.00589272	2.12661	7.05347	15	0.0082982	0.0176471	0.189912	1.31541	9.88282	13	152	0.0110827	0.0855263	1	1	Not associated
GO Biological Process	GO:0035306	positive regulation of dephosphorylation	0.00591361	4.44538	1.12476	5	0.00132325	0.00588235	0.017231	3.84505	1.0403	4	16	0.00341006	0.25	1	1	Not associated
GO Biological Process	GO:0060547	negative regulation of necrotic cell death	0.00591755	8.34234	0.359611	3	0.000423072	0.00352941	0.375423	2.19718	0.45513	1	7	0.000852515	0.142857	1	1	Not associated
GO Biological Process	GO:0006412	translation	0.00596533	1.65537	18.1229	30	0.021321	0.0352941	0.90521	0.766881	23.4717	18	361	0.0153453	0.0498615	1	1	Not associated
GO Biological Process	GO:0019048	modulation by virus of host morphology or physiology	0.00600638	1.55271	24.4733	38	0.0287921	0.0447059	0.203242	1.18647	22.7565	27	350	0.0230179	0.0771429	1	1	Not associated
GO Biological Process	GO:0006833	water transport	0.00600973	2.60955	3.83208	10	0.00450832	0.0117647	0.115672	1.92253	2.60074	5	40	0.00426258	0.125	1	1	Not associated
MSigDB Pathway	BIOCARTA_PDGF_PATHWAY	PDGF Signaling Pathway	0.00605206	2.77878	3.23883	9	0.00381039	0.0105882	0.053751	2.40316	2.08059	5	32	0.00426258	0.15625	1	1	Not associated
GO Biological Process	GO:0065008	regulation of biological quality	0.0060786	1.14478	230.612	264	0.271308	0.310588	0.000196753	1.24087	183.743	228	2826	0.194373	0.0806794	1	0.339398	Not associated
GO Biological Process	GO:0090263	positive regulation of canonical Wnt receptor signaling pathway	0.00609965	2.18544	6.40604	14	0.00753652	0.0164706	0.273231	1.4241	3.511	5	54	0.00426258	0.0925926	1	1	Not associated
MSigDB Pathway	BIOCARTA_WNT_PATHWAY	WNT Signaling Pathway	0.00612165	2.77366	3.2448	9	0.00381742	0.0105882	0.0849682	2.36619	1.69048	4	26	0.00341006	0.153846	1	1	Not associated
GO Cellular Component	GO:0019867	outer membrane	0.00616817	1.85078	11.3466	21	0.0133489	0.0247059	0.0225844	1.69782	10.0129	17	154	0.0144928	0.11039	1	1	Not associated
GO Molecular Function	GO:0017076	purine nucleotide binding	0.00627235	1.19639	144.602	173	0.17012	0.203529	0.109579	1.10685	121.065	134	1862	0.114237	0.0719656	1	1	Not associated
GO Cellular Component	GO:0031091	platelet alpha granule	0.00629856	2.34622	5.11461	12	0.00601719	0.0141177	0.0148655	2.30703	3.90111	9	60	0.00767263	0.15	1	1	Not associated
GO Molecular Function	GO:0022804	active transmembrane transporter activity	0.00631623	1.55799	23.7485	37	0.0279394	0.0435294	0.0239	1.47203	19.7006	29	303	0.0247229	0.0957096	1	1	Not associated
GO Biological Process	GO:0034620	cellular response to unfolded protein	0.00633002	2.45455	4.48147	11	0.00527231	0.0129412	0.0520136	1.7884	5.5916	10	86	0.00852515	0.116279	1	1	Not associated
GO Biological Process	GO:0071377	cellular response to glucagon stimulus	0.00633882	2.75811	3.2631	9	0.00383894	0.0105882	0.0895341	2.07841	2.40569	5	37	0.00426258	0.135135	1	1	Not associated
GO Molecular Function	GO:0046030	inositol trisphosphate phosphatase activity	0.00636691	8.12186	0.369373	3	0.000434557	0.00352941	0.112172	3.41783	0.585167	2	9	0.00170503	0.222222	1	1	Not associated
GO Cellular Component	GO:0033116	endoplasmic reticulum-Golgi intermediate compartment membrane	0.00636793	3.7004	1.62145	6	0.00190758	0.00705882	0.0849682	2.36619	1.69048	4	26	0.00341006	0.153846	1	1	Not associated
GO Biological Process	GO:0009886	post-embryonic morphogenesis	0.00637352	3.69971	1.62175	6	0.00190794	0.00705882	0.553804	1.28168	0.780223	1	12	0.000852515	0.0833333	1	1	Not associated
MSigDB Pathway	REACTOME_BILE_SALT_AND_ORGANIC_ANION_SLC_TRANSPORTERS	Genes involved in Bile salt and organic anion SLC transporters	0.00639034	4.36182	1.14631	5	0.0013486	0.00588235	0.522756	1.3982	0.715204	1	11	0.000852515	0.0909091	1	1	Not associated
MSigDB Pathway	BIOCARTA_EIF_PATHWAY	Eukaryotic protein translation	0.00640669	5.53126	0.723163	4	0.00085078	0.00470588	0.279431	1.92253	1.0403	2	16	0.00170503	0.125	1	1	Not associated
GO Biological Process	GO:0032855	positive regulation of Rac GTPase activity	0.00644699	2.75058	3.27203	9	0.00384945	0.0105882	0.16419	1.86427	2.14561	4	33	0.00341006	0.121212	1	1	Not associated
PANTHER Pathway	P00049	Parkinson disease	0.0064912	2.246	5.78808	13	0.00680951	0.0152941	0.336635	1.23749	5.65662	7	87	0.0059676	0.0804598	1	1	Not associated
GO Biological Process	GO:0045937	positive regulation of phosphate metabolic process	0.00650635	1.30599	68.1476	89	0.0801737	0.104706	3.56747e-05	1.61084	45.3179	73	697	0.0622336	0.104735	1	0.0615388	Not associated
MSigDB Pathway	PID_AURORA_A_PATHWAY	Aurora A signaling	0.00650734	3.68325	1.629	6	0.00191647	0.00705882	0.139346	1.98455	2.01558	4	31	0.00341006	0.129032	1	1	Not associated
GO Biological Process	GO:0032269	negative regulation of cellular protein metabolic process	0.0065158	1.41703	39.5194	56	0.0464934	0.0658824	0.0358103	1.33599	30.6888	41	472	0.0349531	0.0868644	1	1	Not associated
GO Molecular Function	GO:0070273	phosphatidylinositol-4-phosphate binding	0.00654375	4.33651	1.153	5	0.00135647	0.00588235	0.023294	4.61407	0.650186	3	10	0.00255755	0.3	1	1	Not associated
GO Molecular Function	GO:0004364	glutathione transferase activity	0.00654886	5.49605	0.727796	4	0.00085623	0.00470588	0.0585626	2.67482	1.49543	4	23	0.00341006	0.173913	1	1	Not associated
GO Cellular Component	GO:0036379	myofilament	0.00659196	4.32869	1.15508	5	0.00135892	0.00588235	0.13725	2.30703	1.30037	3	20	0.00255755	0.15	1	1	Not associated
GO Cellular Component	GO:0005742	mitochondrial outer membrane translocase complex	0.00662489	8.00443	0.374792	3	0.000440932	0.00352941	0.0712839	4.39435	0.45513	2	7	0.00170503	0.285714	1	1	Not associated
GO Biological Process	GO:0046939	nucleotide phosphorylation	0.00663613	4.3216	1.15698	5	0.00136115	0.00588235	0.0508998	2.7964	1.43041	4	22	0.00341006	0.181818	1	1	Not associated
GO Biological Process	GO:0010627	regulation of intracellular protein kinase cascade	0.00664362	1.29196	73.5318	95	0.086508	0.111765	3.28829e-05	1.59177	48.3738	77	744	0.0656436	0.103495	1	0.056723	Not associated
GO Biological Process	GO:0045321	leukocyte activation	0.00664368	1.46149	32.8431	48	0.038639	0.0564706	0.00269511	1.61667	22.8865	37	352	0.0315431	0.105114	1	1	Not associated
GO Cellular Component	GO:0035102	PRC1 complex	0.00664821	7.99412	0.375276	3	0.000441501	0.00352941	0.0387552	3.84505	0.780223	3	12	0.00255755	0.25	1	1	Not associated
GO Molecular Function	GO:0017169	CDP-alcohol phosphatidyltransferase activity	0.00674729	7.95082	0.377319	3	0.000443905	0.00352941	0.416048	1.92253	0.520149	1	8	0.000852515	0.125	1	1	Not associated
GO Biological Process	GO:1902107	positive regulation of leukocyte differentiation	0.00675169	1.86735	10.7104	20	0.0126004	0.0235294	0.000120515	2.66196	6.76193	18	104	0.0153453	0.173077	1	0.207889	Not associated
PANTHER Pathway	P00047	PDGF signaling pathway	0.00677637	1.77847	12.9325	23	0.0152147	0.0270588	0.00109029	2.23261	8.0623	18	124	0.0153453	0.145161	1	1	Not associated
GO Biological Process	GO:0070374	positive regulation of ERK1 and ERK2 cascade	0.00678944	1.77816	12.9347	23	0.0152173	0.0270588	0.000780471	2.43647	6.56687	16	101	0.0136402	0.158416	1	1	Not associated
GO Biological Process	GO:0051179	localization	0.00684956	1.11515	305.79	341	0.359752	0.401176	0.0122456	1.12147	262.155	294	4032	0.250639	0.0729167	1	1	Not associated
GO Biological Process	GO:0032480	negative regulation of type I interferon production	0.00692155	3.63467	1.65077	6	0.00194208	0.00705882	0.0271421	2.56337	2.34067	6	36	0.00511509	0.166667	1	1	Not associated
MSigDB Pathway	REACTOME_DOWNSTREAM_SIGNAL_TRANSDUCTION	Genes involved in Downstream signal transduction	0.00694051	2.03036	7.88038	16	0.00927104	0.0188235	0.0158647	2.00612	5.98171	12	92	0.0102302	0.130435	1	1	Not associated
GO Molecular Function	GO:0046943	carboxylic acid transmembrane transporter activity	0.00695508	2.02988	7.88223	16	0.00927321	0.0188235	0.0988617	1.58559	6.3068	10	97	0.00852515	0.103093	1	1	Not associated
GO Biological Process	GO:0009615	response to virus	0.00701797	1.72603	14.4841	25	0.0170401	0.0294118	0.137412	1.29194	16.2546	21	250	0.0179028	0.084	1	1	Not associated
MSigDB Pathway	REACTOME_METABOLISM_OF_POLYAMINES	Genes involved in Metabolism of polyamines	0.00711364	5.36502	0.745571	4	0.000877142	0.00470588	0.25468	2.0507	0.975279	2	15	0.00170503	0.133333	1	1	Not associated
MSigDB Pathway	REACTOME_CYCLIN_E_ASSOCIATED_EVENTS_DURING_G1_S_TRANSITION_	Genes involved in Cyclin E associated events during G1/S transition	0.00711764	2.70677	3.325	9	0.00391176	0.0105882	0.0589393	1.89295	4.22621	8	65	0.00682012	0.123077	1	1	Not associated
MSigDB Pathway	REACTOME_GOLGI_ASSOCIATED_VESICLE_BIOGENESIS	Genes involved in Golgi Associated Vesicle Biogenesis	0.00720063	2.70166	3.33128	9	0.00391916	0.0105882	0.455032	1.16077	3.44598	4	53	0.00341006	0.0754717	1	1	Not associated
GO Biological Process	GO:0050684	regulation of mRNA processing	0.00722816	2.40876	4.56667	11	0.00537255	0.0129412	0.0546546	1.92253	4.16119	8	64	0.00682012	0.125	1	1	Not associated
GO Biological Process	GO:0021680	cerebellar Purkinje cell layer development	0.00726767	2.90737	2.75163	8	0.00323721	0.00941177	0.00288503	4.01223	1.49543	6	23	0.00511509	0.26087	1	1	Not associated
MSigDB Pathway	BIOCARTA_EPONFKB_PATHWAY	Erythropoietin mediated neuroprotection through NF-kB	0.00727686	5.32955	0.750533	4	0.00088298	0.00470588	0.157476	2.7964	0.715204	2	11	0.00170503	0.181818	1	1	Not associated
GO Biological Process	GO:0033043	regulation of organelle organization	0.0072798	1.35207	51.7727	70	0.060909	0.0823529	0.0794516	1.23042	39.0111	48	600	0.0409207	0.08	1	1	Not associated
GO Biological Process	GO:0007623	circadian rhythm	0.00728342	2.07502	7.22885	15	0.00850453	0.0176471	0.119731	1.61897	4.94141	8	76	0.00682012	0.105263	1	1	Not associated
MSigDB Pathway	REACTOME_DOWNREGULATION_OF_TGF_BETA_RECEPTOR_SIGNALING	Genes involved in Downregulation of TGF-beta receptor signaling	0.00730349	3.18789	2.19581	7	0.0025833	0.00823529	0.00173429	4.39435	1.36539	6	21	0.00511509	0.285714	1	1	Not associated
GO Molecular Function	GO:0035639	purine ribonucleoside triphosphate binding	0.00730574	1.19634	139.592	167	0.164226	0.196471	0.114442	1.10649	117.489	130	1807	0.110827	0.0719425	1	1	Not associated
GO Biological Process	GO:0030174	regulation of DNA-dependent DNA replication initiation	0.00737159	15.7862	0.126693	2	0.000149051	0.00235294	0.0531656	5.12674	0.390111	2	6	0.00170503	0.333333	1	1	Not associated
GO Molecular Function	GO:0004017	adenylate kinase activity	0.00739271	7.68811	0.390213	3	0.000459074	0.00352941	0.0712839	4.39435	0.45513	2	7	0.00170503	0.285714	1	1	Not associated
GO Biological Process	GO:0035556	intracellular signal transduction	0.00745727	1.20419	130.378	157	0.153386	0.184706	0.000118992	1.37209	94.0169	129	1446	0.109974	0.0892116	1	0.205261	Not associated
MSigDB Pathway	PID_IL12_STAT4PATHWAY	IL12 signaling mediated by STAT4	0.00746495	3.1744	2.20514	7	0.00259428	0.00823529	0.00462781	3.26247	2.14561	7	33	0.0059676	0.212121	1	1	Not associated
GO Biological Process	GO:0070372	regulation of ERK1 and ERK2 cascade	0.00747513	1.65945	16.873	28	0.0198506	0.0329412	0.000149213	2.41033	8.71249	21	134	0.0179028	0.156716	1	0.257393	Not associated
GO Biological Process	GO:0035967	cellular response to topologically incorrect protein	0.00751418	2.39544	4.59206	11	0.00540242	0.0129412	0.0752409	1.67176	5.98171	10	92	0.00852515	0.108696	1	1	Not associated
GO Biological Process	GO:0072659	protein localization to plasma membrane	0.00752694	2.20395	5.89851	13	0.00693943	0.0152941	0.0499624	1.87057	4.81137	9	74	0.00767263	0.121622	1	1	Not associated
PANTHER Pathway	P00054	Toll receptor signaling pathway	0.00753374	2.68179	3.35596	9	0.00394819	0.0105882	0.0965493	1.88329	3.18591	6	49	0.00511509	0.122449	1	1	Not associated
GO Biological Process	GO:1900151	regulation of nuclear-transcribed mRNA catabolic process, deadenylation-dependent decay	0.0075341	4.18844	1.19376	5	0.00140442	0.00588235	0.030509	4.19461	0.715204	3	11	0.00255755	0.272727	1	1	Not associated
GO Biological Process	GO:0044270	cellular nitrogen compound catabolic process	0.00756662	1.35999	49.2649	67	0.0579587	0.0788235	0.138491	1.15551	50.1943	58	772	0.0494459	0.0751295	1	1	Not associated
GO Biological Process	GO:0044267	cellular protein metabolic process	0.00761092	1.14701	215.342	247	0.253343	0.290588	0.169637	1.06378	190.829	203	2935	0.173061	0.0691652	1	1	Not associated
GO Biological Process	GO:0051825	adhesion to other organism involved in symbiotic interaction	0.00763781	7.59621	0.394934	3	0.000464628	0.00352941	0.112172	3.41783	0.585167	2	9	0.00170503	0.222222	1	1	Not associated
GO Molecular Function	GO:0042974	retinoic acid receptor binding	0.0076784	3.55403	1.68823	6	0.00198615	0.00705882	0.778781	0.715359	2.7958	2	43	0.00170503	0.0465116	1	1	Not associated
MSigDB Pathway	ST_JAK_STAT_PATHWAY	Jak-STAT Pathway	0.00768531	5.24495	0.762638	4	0.000897221	0.00470588	0.112172	3.41783	0.585167	2	9	0.00170503	0.222222	1	1	Not associated
GO Biological Process	GO:0044003	modification by symbiont of host morphology or physiology	0.00771079	1.52734	24.8798	38	0.0292704	0.0447059	0.233306	1.16321	23.2116	27	357	0.0230179	0.0756302	1	1	Not associated
GO Biological Process	GO:0009892	negative regulation of metabolic process	0.00771952	1.18756	148.203	176	0.174357	0.207059	0.000240132	1.33405	103.445	138	1591	0.117647	0.0867379	1	0.414227	Not associated
GO Biological Process	GO:0009116	nucleoside metabolic process	0.00773299	1.42502	36.4907	52	0.0429302	0.0611765	0.0175497	1.36034	36.0203	49	554	0.0417732	0.0884477	1	1	Not associated
GO Molecular Function	GO:0019901	protein kinase binding	0.00774065	1.44241	33.971	49	0.0399658	0.0576471	0.00305784	1.58266	24.642	39	379	0.0332481	0.102902	1	1	Not associated
GO Cellular Component	GO:0019866	organelle inner membrane	0.00779165	1.54656	23.2775	36	0.0273853	0.0423529	0.267117	1.1309	26.5276	30	408	0.0255754	0.0735294	1	1	Not associated
GO Molecular Function	GO:0000030	mannosyltransferase activity	0.00782659	7.52807	0.398509	3	0.000468834	0.00352941	0.304116	1.80944	1.10532	2	17	0.00170503	0.117647	1	1	Not associated
GO Cellular Component	GO:0033162	melanosome membrane	0.00784752	3.53726	1.69623	6	0.00199556	0.00705882	0.416048	1.92253	0.520149	1	8	0.000852515	0.125	1	1	Not associated
GO Biological Process	GO:0071417	cellular response to organonitrogen compound	0.00793694	1.42296	36.5435	52	0.0429923	0.0611765	0.0079951	1.50244	25.2922	38	389	0.0323956	0.0976864	1	1	Not associated
GO Biological Process	GO:0010556	regulation of macromolecule biosynthetic process	0.00795477	1.12095	279.229	313	0.328504	0.368235	0.0456135	1.09859	233.027	256	3584	0.218244	0.0714286	1	1	Not associated
GO Biological Process	GO:0035304	regulation of protein dephosphorylation	0.00798771	4.12818	1.21119	5	0.00142493	0.00588235	0.0314395	3.23794	1.23535	4	19	0.00341006	0.210526	1	1	Not associated
MSigDB Pathway	KEGG_VIBRIO_CHOLERAE_INFECTION	Vibrio cholerae infection	0.00802041	2.49793	4.00332	10	0.00470979	0.0117647	0.00756015	2.56337	3.511	9	54	0.00767263	0.166667	1	1	Not associated
GO Biological Process	GO:0009142	nucleoside triphosphate biosynthetic process	0.00810586	2.6498	3.39648	9	0.00399586	0.0105882	0.0634299	1.86427	4.29123	8	66	0.00682012	0.121212	1	1	Not associated
MSigDB Pathway	REACTOME_THROMBIN_SIGNALLING_THROUGH_PROTEINASE_ACTIVATED_RECEPTORS_PARS	Genes involved in Thrombin signalling through proteinase activated receptors (PARs)	0.00815417	3.5079	1.71043	6	0.00201227	0.00705882	0.053751	2.40316	2.08059	5	32	0.00426258	0.15625	1	1	Not associated
GO Biological Process	GO:0010762	regulation of fibroblast migration	0.00815924	3.1199	2.24366	7	0.0026396	0.00823529	0.017231	3.84505	1.0403	4	16	0.00341006	0.25	1	1	Not associated
GO Biological Process	GO:0001833	inner cell mass cell proliferation	0.00830363	5.127	0.780183	4	0.000917862	0.00470588	0.0480085	3.54928	0.845241	3	13	0.00255755	0.230769	1	1	Not associated
GO Biological Process	GO:0046700	heterocycle catabolic process	0.00832935	1.35375	49.4922	67	0.0582261	0.0788235	0.138491	1.15551	50.1943	58	772	0.0494459	0.0751295	1	1	Not associated
GO Biological Process	GO:1901990	regulation of mitotic cell cycle phase transition	0.00833661	1.66227	16.2428	27	0.0191092	0.0317647	0.0299845	1.55281	13.5239	21	208	0.0179028	0.100961	1	1	Not associated
GO Biological Process	GO:0046902	regulation of mitochondrial membrane permeability	0.00836284	4.08134	1.22509	5	0.00144128	0.00588235	0.00976654	3.66196	1.36539	5	21	0.00426258	0.238095	1	1	Not associated
GO Cellular Component	GO:0045171	intercellular bridge	0.00836949	7.34369	0.408514	3	0.000480605	0.00352941	0.375423	2.19718	0.45513	1	7	0.000852515	0.142857	1	1	Not associated
GO Biological Process	GO:0052646	alditol phosphate metabolic process	0.00839657	3.10247	2.25627	7	0.00265444	0.00823529	0.0478096	2.48068	2.01558	5	31	0.00426258	0.16129	1	1	Not associated
GO Biological Process	GO:0031324	negative regulation of cellular metabolic process	0.00843448	1.19243	139.212	166	0.163779	0.195294	0.000560669	1.32516	95.8374	127	1474	0.108269	0.0861601	1	0.967154	Not associated
GO Biological Process	GO:0019752	carboxylic acid metabolic process	0.00844468	1.33034	55.6249	74	0.065441	0.0870588	0.429037	1.03044	52.405	54	806	0.0460358	0.0669975	1	1	Not associated
MSigDB Pathway	REACTOME_TGF_BETA_RECEPTOR_SIGNALING_IN_EMT_EPITHELIAL_TO_MESENCHYMAL_TRANSITION	Genes involved in TGF-beta receptor signaling in EMT (epithelial to mesenchymal transition)	0.00844836	4.07101	1.22819	5	0.00144494	0.00588235	0.00140539	5.49294	0.91026	5	14	0.00426258	0.357143	1	1	Not associated
MSigDB Pathway	REACTOME_SIGNALING_BY_ILS	Genes involved in Signaling by Interleukins	0.00845621	1.9388	8.76831	17	0.0103157	0.02	0.0478034	1.70891	7.02201	12	108	0.0102302	0.111111	1	1	Not associated
GO Biological Process	GO:0006837	serotonin transport	0.00850192	7.30111	0.410896	3	0.000483407	0.00352941	0.00786971	6.59152	0.45513	3	7	0.00255755	0.428571	1	1	Not associated
MSigDB Pathway	PID_FOXOPATHWAY	FoxO family signaling	0.00850213	2.25314	5.3259	12	0.00626577	0.0141177	0.0965493	1.88329	3.18591	6	49	0.00511509	0.122449	1	1	Not associated
MSigDB Pathway	REACTOME_TRANSMEMBRANE_TRANSPORT_OF_SMALL_MOLECULES	Genes involved in Transmembrane transport of small molecules	0.00864457	1.45222	31.6757	46	0.0372655	0.0541177	0.206956	1.1686	26.5276	31	408	0.026428	0.0759804	1	1	Not associated
GO Molecular Function	GO:0032555	purine ribonucleotide binding	0.00867472	1.1876	143.988	171	0.169398	0.201177	0.125736	1.10037	119.959	132	1845	0.112532	0.0715447	1	1	Not associated
GO Biological Process	GO:0044710	single-organism metabolic process	0.00867793	1.14472	214.027	245	0.251796	0.288235	0.198995	1.05516	199.022	210	3061	0.179028	0.068605	1	1	Not associated
MSigDB Pathway	KEGG_OXIDATIVE_PHOSPHORYLATION	Oxidative phosphorylation	0.00870397	2.16296	6.01028	13	0.00707092	0.0152941	0.210534	1.32174	8.32238	11	128	0.00937766	0.0859375	1	1	Not associated
GO Biological Process	GO:0097193	intrinsic apoptotic signaling pathway	0.00875231	1.89033	9.52213	18	0.0112025	0.0211765	0.262548	1.2532	8.77751	11	135	0.00937766	0.0814815	1	1	Not associated
GO Biological Process	GO:1902275	regulation of chromatin organization	0.00879526	1.97677	8.09403	16	0.00952238	0.0188235	0.16419	1.45707	6.17676	9	95	0.00767263	0.0947368	1	1	Not associated
GO Cellular Component	GO:0008180	COP9 signalosome	0.00883197	3.07187	2.27874	7	0.00268087	0.00823529	0.190478	1.75774	2.27565	4	35	0.00341006	0.114286	1	1	Not associated
GO Molecular Function	GO:0032550	purine ribonucleoside binding	0.00884202	1.19007	140.328	167	0.165092	0.196471	0.126425	1.10101	118.074	130	1816	0.110827	0.0715859	1	1	Not associated
MSigDB Pathway	REACTOME_ACTIVATION_OF_BH3_ONLY_PROTEINS	Genes involved in Activation of BH3-only proteins	0.0088765	4.02111	1.24344	5	0.00146287	0.00588235	0.017231	3.84505	1.0403	4	16	0.00341006	0.25	1	1	Not associated
GO Molecular Function	GO:0005342	organic acid transmembrane transporter activity	0.00888464	1.97449	8.10338	16	0.00953338	0.0188235	0.114899	1.53802	6.50186	10	100	0.00852515	0.1	1	1	Not associated
MSigDB Pathway	ST_STAT3_PATHWAY	STAT3 Pathway	0.008903	5.02266	0.796391	4	0.000936931	0.00470588	0.157476	2.7964	0.715204	2	11	0.00170503	0.181818	1	1	Not associated
GO Molecular Function	GO:0004862	cAMP-dependent protein kinase inhibitor activity	0.00897315	5.01102	0.798241	4	0.000939107	0.00470588	0.0910495	3.84505	0.520149	2	8	0.00170503	0.25	1	1	Not associated
MSigDB Pathway	REACTOME_METABOLISM_OF_PROTEINS	Genes involved in Metabolism of proteins	0.00899274	1.47751	28.4262	42	0.0334426	0.0494118	0.143098	1.21048	28.088	34	432	0.0289855	0.0787037	1	1	Not associated
GO Biological Process	GO:0015992	proton transport	0.00901915	2.79773	2.85946	8	0.00336407	0.00941177	0.135851	1.63124	4.29123	7	66	0.0059676	0.106061	1	1	Not associated
GO Molecular Function	GO:0001883	purine nucleoside binding	0.00903483	1.18935	140.412	167	0.165191	0.196471	0.130598	1.09919	118.269	130	1819	0.110827	0.0714678	1	1	Not associated
GO Biological Process	GO:0046928	regulation of neurotransmitter secretion	0.0090971	2.79341	2.86388	8	0.00336927	0.00941177	0.363936	1.3982	2.14561	3	33	0.00255755	0.0909091	1	1	Not associated
GO Biological Process	GO:0006639	acylglycerol metabolic process	0.00910271	2.08092	6.7278	14	0.00791505	0.0164706	0.239156	1.35211	5.91669	8	91	0.00682012	0.0879121	1	1	Not associated
GO Biological Process	GO:0006090	pyruvate metabolic process	0.00912571	3.05217	2.29345	7	0.00269817	0.00823529	0.363936	1.3982	2.14561	3	33	0.00255755	0.0909091	1	1	Not associated
GO Biological Process	GO:1901361	organic cyclic compound catabolic process	0.0091407	1.33773	52.3275	70	0.0615618	0.0823529	0.156957	1.14068	52.6	60	809	0.0511509	0.0741656	1	1	Not associated
GO Biological Process	GO:0010822	positive regulation of mitochondrion organization	0.00916914	2.5964	3.46633	9	0.00407804	0.0105882	0.0225531	2.27855	3.511	8	54	0.00682012	0.148148	1	1	Not associated
MSigDB Pathway	BIOCARTA_RELA_PATHWAY	Acetylation and Deacetylation of RelA in The Nucleus	0.00917978	4.97738	0.803636	4	0.000945454	0.00470588	0.279431	1.92253	1.0403	2	16	0.00170503	0.125	1	1	Not associated
GO Molecular Function	GO:0005160	transforming growth factor beta receptor binding	0.00919149	3.04786	2.29669	7	0.00270199	0.00823529	0.000176403	5.38308	1.30037	7	20	0.0059676	0.35	1	0.304295	Not associated
GO Molecular Function	GO:0032549	ribonucleoside binding	0.00922399	1.18867	140.494	167	0.165287	0.196471	0.132009	1.09859	118.334	130	1820	0.110827	0.0714286	1	1	Not associated
GO Molecular Function	GO:0015293	symporter activity	0.00926125	1.84278	10.3105	19	0.01213	0.0223529	0.0729665	1.56205	8.32238	13	128	0.0110827	0.101562	1	1	Not associated
GO Biological Process	GO:0006509	membrane protein ectodomain proteolysis	0.00932082	3.97227	1.25873	5	0.00148086	0.00588235	0.122263	2.42846	1.23535	3	19	0.00255755	0.157895	1	1	Not associated
GO Biological Process	GO:0032471	reduction of endoplasmic reticulum calcium ion concentration	0.00937403	13.921	0.143668	2	0.000169021	0.00235294	0.331975	2.56337	0.390111	1	6	0.000852515	0.166667	1	1	Not associated
MSigDB Pathway	REACTOME_RECRUITMENT_OF_MITOTIC_CENTROSOME_PROTEINS_AND_COMPLEXES	Genes involved in Recruitment of mitotic centrosome proteins and complexes	0.009466	2.43493	4.10689	10	0.00483164	0.0117647	0.390525	1.22065	4.09617	5	63	0.00426258	0.0793651	1	1	Not associated
GO Biological Process	GO:0010941	regulation of cell death	0.00951172	1.22134	107.259	131	0.126188	0.154118	0.000285483	1.38549	78.6725	109	1210	0.0929241	0.0900826	1	0.492458	Not associated
GO Biological Process	GO:0042482	positive regulation of odontogenesis	0.00953381	3.94982	1.26588	5	0.00148927	0.00588235	0.00786971	6.59152	0.45513	3	7	0.00255755	0.428571	1	1	Not associated
GO Biological Process	GO:0030835	negative regulation of actin filament depolymerization	0.0095364	3.38972	1.77006	6	0.00208242	0.00705882	0.127535	2.0507	1.95056	4	30	0.00341006	0.133333	1	1	Not associated
GO Molecular Function	GO:0015405	P-P-bond-hydrolysis-driven transmembrane transporter activity	0.00957985	1.95751	8.17365	16	0.00961605	0.0188235	0.0110031	1.97544	7.08702	14	109	0.0119352	0.12844	1	1	Not associated
GO Biological Process	GO:0043367	CD4-positive, alpha-beta T cell differentiation	0.00961397	3.02096	2.31714	7	0.00272605	0.00823529	0.423624	1.3982	1.43041	2	22	0.00170503	0.0909091	1	1	Not associated
MSigDB Pathway	REACTOME_REGULATION_OF_COMPLEMENT_CASCADE	Genes involved in Regulation of Complement cascade	0.00966984	6.96024	0.431019	3	0.000507082	0.00352941	0.582835	1.18309	0.845241	1	13	0.000852515	0.0769231	1	1	Not associated
GO Biological Process	GO:0050901	leukocyte tethering or rolling	0.00968676	4.89868	0.816546	4	0.000960643	0.00470588	0.157476	2.7964	0.715204	2	11	0.00170503	0.181818	1	1	Not associated
MSigDB Pathway	PID_PI3KCIPATHWAY	Class I PI3K signaling events	0.00974834	2.42384	4.12568	10	0.00485375	0.0117647	0.0417522	2.15323	3.25093	7	50	0.0059676	0.14	1	1	Not associated
MSigDB Pathway	PID_IL1PATHWAY	IL1-mediated signaling events	0.00982701	2.75486	2.90396	8	0.00341642	0.00941177	0.08158	2.13614	2.34067	5	36	0.00426258	0.138889	1	1	Not associated
GO Molecular Function	GO:0003676	nucleic acid binding	0.00991277	1.13013	241.564	273	0.284193	0.321176	0.569905	0.991542	220.868	219	3397	0.186701	0.0644687	1	1	Not associated
MSigDB Pathway	REACTOME_NONSENSE_MEDIATED_DECAY_ENHANCED_BY_THE_EXON_JUNCTION_COMPLEX	Genes involved in Nonsense Mediated Decay Enhanced by the Exon Junction Complex	0.0099564	2.41588	4.13927	10	0.00486973	0.0117647	0.549113	1.00618	6.95699	7	107	0.0059676	0.0654206	1	1	Not associated
GO Molecular Function	GO:0042623	ATPase activity, coupled	0.00996864	1.55278	21.2523	33	0.0250027	0.0388235	0.0809808	1.34442	18.5953	25	286	0.0213129	0.0874126	1	1	Not associated
MSigDB Pathway	BIOCARTA_IL2RB_PATHWAY	IL-2 Receptor Beta Chain in T cell Activation	0.0100415	2.74413	2.91532	8	0.00342979	0.00941177	0.0344921	2.42846	2.47071	6	38	0.00511509	0.157895	1	1	Not associated
MSigDB Pathway	REACTOME_TRANS_GOLGI_NETWORK_VESICLE_BUDDING	Genes involved in trans-Golgi Network Vesicle Budding	0.0100482	2.55711	3.51959	9	0.0041407	0.0105882	0.55334	1.02535	3.90111	4	60	0.00341006	0.0666667	1	1	Not associated
GO Cellular Component	GO:0005776	autophagic vacuole	0.0101485	2.98877	2.3421	7	0.00275541	0.00823529	0.0430152	2.30703	2.60074	6	40	0.00511509	0.15	1	1	Not associated
PANTHER Pathway	P05731	GABA-B receptor II signaling	0.010169	2.55201	3.52663	9	0.00414898	0.0105882	0.0668579	2.2618	2.21063	5	34	0.00426258	0.147059	1	1	Not associated
MSigDB Pathway	BIOCARTA_ATM_PATHWAY	ATM Signaling Pathway	0.0101948	3.8838	1.2874	5	0.00151459	0.00588235	0.13725	2.30703	1.30037	3	20	0.00255755	0.15	1	1	Not associated
MSigDB Pathway	REACTOME_TGF_BETA_RECEPTOR_SIGNALING_ACTIVATES_SMADS	Genes involved in TGF-beta receptor signaling activates SMADs	0.0103289	2.97834	2.3503	7	0.00276506	0.00823529	0.00363803	3.84505	1.56045	6	24	0.00511509	0.25	1	1	Not associated
GO Molecular Function	GO:0001882	nucleoside binding	0.0103326	1.18487	140.943	167	0.165816	0.196471	0.14667	1.09258	118.984	130	1830	0.110827	0.0710382	1	1	Not associated
GO Cellular Component	GO:0031410	cytoplasmic vesicle	0.0103335	1.26084	79.312	100	0.0933083	0.117647	0.178425	1.11518	64.5634	72	993	0.0613811	0.0725076	1	1	Not associated
MSigDB Pathway	KEGG_VIRAL_MYOCARDITIS	Viral myocarditis	0.0104239	2.28441	4.81524	11	0.00566499	0.0129412	0.151867	1.58326	4.42126	7	68	0.0059676	0.102941	1	1	Not associated
GO Cellular Component	GO:0043234	protein complex	0.0104854	1.12316	257.309	289	0.302717	0.34	0.417026	1.01352	236.798	240	3642	0.204604	0.0658979	1	1	Not associated
MSigDB Pathway	REACTOME_P53_DEPENDENT_G1_DNA_DAMAGE_RESPONSE	Genes involved in p53-Dependent G1 DNA Damage Response	0.0105169	2.96769	2.35874	7	0.00277499	0.00823529	0.145624	1.67784	3.57602	6	55	0.00511509	0.109091	1	1	Not associated
GO Cellular Component	GO:0005654	nucleoplasm	0.0106925	1.22236	103.079	126	0.12127	0.148235	0.0371381	1.18059	92.3264	109	1420	0.0929241	0.0767606	1	1	Not associated
MSigDB Pathway	REACTOME_AKT_PHOSPHORYLATES_TARGETS_IN_THE_CYTOSOL	Genes involved in AKT phosphorylates targets in the cytosol	0.0107227	6.69682	0.447974	3	0.000527028	0.00352941	0.18122	2.56337	0.780223	2	12	0.00170503	0.166667	1	1	Not associated
GO Molecular Function	GO:0005524	ATP binding	0.0109249	1.20537	116.976	141	0.137619	0.165882	0.115043	1.11951	95.5773	107	1470	0.0912191	0.0727891	1	1	Not associated
GO Molecular Function	GO:0009055	electron carrier activity	0.011003	2.26629	4.85375	11	0.00571029	0.0129412	0.00720637	2.22365	5.39654	12	83	0.0102302	0.144578	1	1	Not associated
GO Molecular Function	GO:0030554	adenyl nucleotide binding	0.0111367	1.19988	121.679	146	0.143152	0.171765	0.119457	1.11524	98.6332	110	1517	0.0937766	0.0725115	1	1	Not associated
MSigDB Pathway	REACTOME_REGULATION_OF_IFNA_SIGNALING	Genes involved in Regulation of IFNA signaling	0.011328	4.67531	0.855559	4	0.00100654	0.00470588	0.468477	1.28168	1.56045	2	24	0.00170503	0.0833333	1	1	Not associated
MSigDB Pathway	BIOCARTA_EGF_PATHWAY	EGF Signaling Pathway	0.0113674	2.68295	2.98179	8	0.00350799	0.00941177	0.0478096	2.48068	2.01558	5	31	0.00426258	0.16129	1	1	Not associated
MSigDB Pathway	KEGG_EPITHELIAL_CELL_SIGNALING_IN_HELICOBACTER_PYLORI_INFECTION	Epithelial cell signaling in Helicobacter pylori infection	0.0114603	2.36321	4.23154	10	0.00497828	0.0117647	0.0681276	1.83644	4.35624	8	67	0.00682012	0.119403	1	1	Not associated
GO Molecular Function	GO:0003727	single-stranded RNA binding	0.0115421	2.36056	4.23629	10	0.00498387	0.0117647	0.0279353	2.34047	2.99085	7	46	0.0059676	0.152174	1	1	Not associated
PANTHER Pathway	P05916	Opioid prodynorphin pathway	0.0117381	2.90329	2.41106	7	0.00283654	0.00823529	0.151573	1.92253	2.08059	4	32	0.00341006	0.125	1	1	Not associated
GO Molecular Function	GO:0032553	ribonucleotide binding	0.0118279	1.17739	145.237	171	0.170866	0.201177	0.145758	1.09209	120.87	132	1859	0.112532	0.0710059	1	1	Not associated
MSigDB Pathway	KEGG_CELL_CYCLE	Cell cycle	0.0118849	1.86677	9.10665	17	0.0107137	0.02	0.0306148	1.73648	8.0623	14	124	0.0119352	0.112903	1	1	Not associated
PANTHER Pathway	P00035	Interferon-gamma signaling pathway	0.0121183	3.21425	1.86669	6	0.0021961	0.00705882	0.105267	2.19718	1.82052	4	28	0.00341006	0.142857	1	1	Not associated
MSigDB Pathway	BIOCARTA_MCM_PATHWAY	CDK Regulation of DNA Replication	0.0124202	4.54786	0.879535	4	0.00103475	0.00470588	0.0261297	3.41783	1.17033	4	18	0.00341006	0.222222	1	1	Not associated
MSigDB Pathway	REACTOME_IL_6_SIGNALING	Genes involved in Interleukin-6 signaling	0.0124319	4.54656	0.879786	4	0.00103504	0.00470588	0.134391	3.07604	0.650186	2	10	0.00170503	0.2	1	1	Not associated
MSigDB Pathway	KEGG_INSULIN_SIGNALING_PATHWAY	Insulin signaling pathway	0.0124359	1.75688	11.3838	20	0.0133928	0.0235294	0.00821571	1.89467	8.97256	17	138	0.0144928	0.123188	1	1	Not associated
GO Molecular Function	GO:0015238	drug transmembrane transporter activity	0.0125055	4.53849	0.88135	4	0.00103688	0.00470588	0.00199601	5.12674	0.975279	5	15	0.00426258	0.333333	1	1	Not associated
GO Molecular Function	GO:0008514	organic anion transmembrane transporter activity	0.0126369	1.8169	9.90698	18	0.0116553	0.0211765	0.144794	1.40888	8.51743	12	131	0.0102302	0.0916031	1	1	Not associated
MSigDB Pathway	PID_TCRJNKPATHWAY	JNK signaling in the CD4+ TCR pathway	0.0126689	3.1824	1.88537	6	0.00221808	0.00705882	0.0582344	3.29576	0.91026	3	14	0.00255755	0.214286	1	1	Not associated
GO Cellular Component	GO:0005637	nuclear inner membrane	0.0128618	2.6228	3.05017	8	0.00358844	0.00941177	0.0668579	2.2618	2.21063	5	34	0.00426258	0.147059	1	1	Not associated
MSigDB Pathway	BIOCARTA_RNA_PATHWAY	Double Stranded RNA Induced Gene Expression	0.012941	6.23998	0.48077	3	0.000565612	0.00352941	0.112172	3.41783	0.585167	2	9	0.00170503	0.222222	1	1	Not associated
GO Molecular Function	GO:0030507	spectrin binding	0.012961	3.65409	1.36833	5	0.0016098	0.00588235	0.0480085	3.54928	0.845241	3	13	0.00255755	0.230769	1	1	Not associated
MSigDB Pathway	PID_E2F_PATHWAY	E2F transcription factor network	0.0130183	2.21029	4.97673	11	0.00585498	0.0129412	0.0464458	1.89619	4.74636	9	73	0.00767263	0.123288	1	1	Not associated
MSigDB Pathway	REACTOME_PRE_NOTCH_TRANSCRIPTION_AND_TRANSLATION	Genes involved in Pre-NOTCH Transcription and Translation	0.0131247	2.83873	2.4659	7	0.00290105	0.00823529	0.0948607	2.27855	1.7555	4	27	0.00341006	0.148148	1	1	Not associated
MSigDB Pathway	REACTOME_TIGHT_JUNCTION_INTERACTIONS	Genes involved in Tight junction interactions	0.0134015	3.14242	1.90936	6	0.00224631	0.00705882	0.291173	1.59106	1.88554	3	29	0.00255755	0.103448	1	1	Not associated
GO Molecular Function	GO:0019899	enzyme binding	0.0134019	1.21991	98.3681	120	0.115727	0.141177	0.0243239	1.22253	76.0717	93	1170	0.0792839	0.0794872	1	1	Not associated
MSigDB Pathway	REACTOME_P75NTR_SIGNALS_VIA_NFKB	Genes involved in p75NTR signals via NF-kB	0.0135932	4.42561	0.90383	4	0.00106333	0.00470588	0.0480085	3.54928	0.845241	3	13	0.00255755	0.230769	1	1	Not associated
GO Cellular Component	GO:0070382	exocytic vesicle	0.0136633	6.11321	0.490741	3	0.000577342	0.00352941	0.0531656	5.12674	0.390111	2	6	0.00170503	0.333333	1	1	Not associated
MSigDB Pathway	REACTOME_MITOTIC_G2_G2_M_PHASES	Genes involved in Mitotic G2-G2/M phases	0.0138479	2.18985	5.02317	11	0.00590961	0.0129412	0.39694	1.18309	5.07145	6	78	0.00511509	0.0769231	1	1	Not associated
GO Cellular Component	GO:0042470	melanosome	0.013851	1.97297	7.0959	14	0.00834812	0.0164706	0.266876	1.30896	6.11174	8	94	0.00682012	0.0851064	1	1	Not associated
MSigDB Pathway	KEGG_NON_SMALL_CELL_LUNG_CANCER	Non-small cell lung cancer	0.0138638	2.18947	5.02404	11	0.00591063	0.0129412	0.00853122	2.51676	3.57602	9	55	0.00767263	0.163636	1	1	Not associated
MSigDB Pathway	REACTOME_LATENT_INFECTION_OF_HOMO_SAPIENS_WITH_MYCOBACTERIUM_TUBERCULOSIS	Genes involved in Latent infection of Homo sapiens with Mycobacterium tuberculosis	0.0138836	3.59017	1.39269	5	0.00163846	0.00588235	0.139346	1.98455	2.01558	4	31	0.00341006	0.129032	1	1	Not associated
GO Cellular Component	GO:0005789	endoplasmic reticulum membrane	0.0139164	1.30505	55.1705	72	0.0649064	0.0847059	0.173942	1.13349	51.1696	58	787	0.0494459	0.0736976	1	1	Not associated
MSigDB Pathway	REACTOME_DEADENYLATION_DEPENDENT_MRNA_DECAY	Genes involved in Deadenylation-dependent mRNA decay	0.0143139	3.09599	1.93799	6	0.00227999	0.00705882	0.320411	1.3982	2.86082	4	44	0.00341006	0.0909091	1	1	Not associated
MSigDB Pathway	REACTOME_GENERATION_OF_SECOND_MESSENGER_MOLECULES	Genes involved in Generation of second messenger molecules	0.0144912	3.55077	1.40814	5	0.00165664	0.00588235	0.511178	1.18309	1.69048	2	26	0.00170503	0.0769231	1	1	Not associated
PANTHER Pathway	P00016	Cytoskeletal regulation by Rho GTPase	0.0144977	2.27634	4.39302	10	0.00516826	0.0117647	0.16019	1.56031	4.48628	7	69	0.0059676	0.101449	1	1	Not associated
MSigDB Pathway	ST_INTERFERON_GAMMA_PATHWAY	Interferon gamma pathway.	0.0145302	4.33701	0.922295	4	0.00108505	0.00470588	0.134391	3.07604	0.650186	2	10	0.00170503	0.2	1	1	Not associated
GO Cellular Component	GO:0005833	hemoglobin complex	0.0147133	10.9718	0.182286	2	0.000214454	0.00235294	0.000954282	5.91547	0.845241	5	13	0.00426258	0.384615	1	1	Not associated
MSigDB Pathway	BIOCARTA_BAD_PATHWAY	Regulation of BAD phosphorylation	0.0147901	2.55567	3.1303	8	0.0036827	0.00941177	0.0241393	2.95774	1.69048	5	26	0.00426258	0.192308	1	1	Not associated
MSigDB Pathway	REACTOME_SIGNALING_BY_SCF_KIT	Genes involved in Signaling by SCF-KIT	0.0152615	2.00694	6.47752	13	0.00762062	0.0152941	0.0249122	2.02371	4.94141	10	76	0.00852515	0.131579	1	1	Not associated
GO Cellular Component	GO:0035097	histone methyltransferase complex	0.0153207	2.25614	4.43235	10	0.00521453	0.0117647	0.403657	1.20158	4.16119	5	64	0.00426258	0.078125	1	1	Not associated
GO Cellular Component	GO:0031143	pseudopodium	0.0154048	5.84107	0.513605	3	0.000604241	0.00352941	0.0480085	3.54928	0.845241	3	13	0.00255755	0.230769	1	1	Not associated
GO Cellular Component	GO:0031968	organelle outer membrane	0.0157229	1.74242	10.9044	19	0.0128287	0.0223529	0.0580651	1.55881	9.62275	15	148	0.0127877	0.101351	1	1	Not associated
GO Molecular Function	GO:0001054	RNA polymerase I activity	0.0158852	10.5331	0.189877	2	0.000223385	0.00235294	0.0910495	3.84505	0.520149	2	8	0.00170503	0.25	1	1	Not associated
MSigDB Pathway	BIOCARTA_STATHMIN_PATHWAY	Stathmin and breast cancer resistance to antimicrotubule agents	0.0159085	3.46602	1.44258	5	0.00169715	0.00588235	0.122263	2.42846	1.23535	3	19	0.00255755	0.157895	1	1	Not associated
MSigDB Pathway	REACTOME_3_UTR_MEDIATED_TRANSLATIONAL_REGULATION	Genes involved in 3' -UTR-mediated translational regulation	0.0159162	2.24224	4.45983	10	0.00524686	0.0117647	0.539001	1.01568	6.89197	7	106	0.0059676	0.0660377	1	1	Not associated
GO Cellular Component	GO:0034708	methyltransferase complex	0.0160409	2.2394	4.46549	10	0.00525352	0.0117647	0.429805	1.16517	4.29123	5	66	0.00426258	0.0757576	1	1	Not associated
GO Molecular Function	GO:0032559	adenyl ribonucleotide binding	0.0162121	1.18735	121.278	144	0.142681	0.169412	0.141404	1.1059	97.6579	108	1502	0.0920716	0.0719041	1	1	Not associated
MSigDB Pathway	KEGG_PHENYLALANINE_METABOLISM	Phenylalanine metabolism	0.0163092	3.44367	1.45194	5	0.00170816	0.00588235	0.107923	2.56337	1.17033	3	18	0.00255755	0.166667	1	1	Not associated
GO Cellular Component	GO:0009925	basal plasma membrane	0.0168317	2.98369	2.01093	6	0.0023658	0.00705882	0.105267	2.19718	1.82052	4	28	0.00341006	0.142857	1	1	Not associated
MSigDB Pathway	SA_REG_CASCADE_OF_CYCLIN_EXPR	Expression of cyclins regulates progression through the cell cycle by activating cyclin-dependent kinases.	0.0170675	5.61688	0.534104	3	0.000628358	0.00352941	0.205441	2.36619	0.845241	2	13	0.00170503	0.153846	1	1	Not associated
MSigDB Pathway	PID_IL27PATHWAY	IL27-mediated signaling events	0.0171098	2.97248	2.01851	6	0.00237472	0.00705882	0.0849682	2.36619	1.69048	4	26	0.00341006	0.153846	1	1	Not associated
GO Cellular Component	GO:0005774	vacuolar membrane	0.0171549	1.57795	16.4771	26	0.0193848	0.0305882	0.183983	1.23042	17.8801	22	275	0.0187553	0.08	1	1	Not associated
GO Molecular Function	GO:0016887	ATPase activity	0.0173129	1.44366	26.322	38	0.030967	0.0447059	0.0898333	1.29246	23.2116	30	357	0.0255754	0.0840336	1	1	Not associated
PANTHER Pathway	P00025	Hedgehog signaling pathway	0.0173289	2.9638	2.02443	6	0.00238168	0.00705882	0.35292	1.61897	1.23535	2	19	0.00170503	0.105263	1	1	Not associated
GO Molecular Function	GO:0050733	RS domain binding	0.01735	10.0485	0.199035	2	0.000234158	0.00235294	0.375423	2.19718	0.45513	1	7	0.000852515	0.142857	1	1	Not associated
GO Cellular Component	GO:0005736	DNA-directed RNA polymerase I complex	0.017387	10.0371	0.199262	2	0.000234425	0.00235294	0.112172	3.41783	0.585167	2	9	0.00170503	0.222222	1	1	Not associated
MSigDB Pathway	REACTOME_G1_S_TRANSITION	Genes involved in G1/S Transition	0.017632	2.03278	5.90324	12	0.00694499	0.0141177	0.0969272	1.55213	7.08702	11	109	0.00937766	0.100917	1	1	Not associated
GO Molecular Function	GO:0043028	cysteine-type endopeptidase regulator activity involved in apoptotic process	0.017737	2.46973	3.23922	8	0.00381085	0.00941177	0.0430152	2.30703	2.60074	6	40	0.00511509	0.15	1	1	Not associated
MSigDB Pathway	BIOCARTA_AGPCR_PATHWAY	Attenuation of GPCR Signaling	0.0178296	4.07373	0.981902	4	0.00115518	0.00470588	0.205441	2.36619	0.845241	2	13	0.00170503	0.153846	1	1	Not associated
MSigDB Pathway	PID_PI3KCIAKTPATHWAY	Class I PI3K signaling events mediated by Akt	0.0179695	2.66168	2.62991	7	0.00309401	0.00823529	0.0740192	2.19718	2.27565	5	35	0.00426258	0.142857	1	1	Not associated
GO Cellular Component	GO:0005876	spindle microtubule	0.0180141	2.46247	3.24878	8	0.00382209	0.00941177	0.16613	1.70891	2.92584	5	45	0.00426258	0.111111	1	1	Not associated
GO Molecular Function	GO:0003956	NAD(P)+-protein-arginine ADP-ribosyltransferase activity	0.0182631	9.77637	0.204575	2	0.000240676	0.00235294	0.0531656	5.12674	0.390111	2	6	0.00170503	0.333333	1	1	Not associated
GO Molecular Function	GO:0008173	RNA methyltransferase activity	0.0182885	3.34209	1.49607	5	0.00176008	0.00588235	0.0478096	2.48068	2.01558	5	31	0.00426258	0.16129	1	1	Not associated
MSigDB Pathway	REACTOME_INTERFERON_GAMMA_SIGNALING	Genes involved in Interferon gamma signaling	0.0183224	2.30675	3.90158	9	0.0045901	0.0105882	0.0932365	1.79436	3.90111	7	60	0.0059676	0.116667	1	1	Not associated
GO Molecular Function	GO:0005518	collagen binding	0.0186014	2.09322	5.25506	11	0.00618242	0.0129412	0.011503	2.56337	3.12089	8	48	0.00682012	0.166667	1	1	Not associated
GO Molecular Function	GO:0017017	MAP kinase tyrosine/serine/threonine phosphatase activity	0.0186239	3.32617	1.50323	5	0.00176851	0.00588235	0.00791109	4.73238	0.845241	4	13	0.00341006	0.307692	1	1	Not associated
MSigDB Pathway	PID_INTEGRIN_A4B1_PATHWAY	Alpha4 beta1 integrin signaling events	0.0188139	2.44218	3.27577	8	0.00385384	0.00941177	0.0601009	2.33034	2.14561	5	33	0.00426258	0.151515	1	1	Not associated
MSigDB Pathway	REACTOME_DEADENYLATION_OF_MRNA	Genes involved in Deadenylation of mRNA	0.0188484	4.00444	0.998892	4	0.00117517	0.00470588	0.35292	1.61897	1.23535	2	19	0.00170503	0.105263	1	1	Not associated
MSigDB Pathway	REACTOME_PLATELET_AGGREGATION_PLUG_FORMATION	Genes involved in Platelet Aggregation (Plug Formation)	0.018963	2.63202	2.65955	7	0.00312889	0.00823529	0.00889642	2.90977	2.40569	7	37	0.0059676	0.189189	1	1	Not associated
GO Molecular Function	GO:0004016	adenylate cyclase activity	0.0190275	3.30746	1.51174	5	0.00177851	0.00588235	0.030509	4.19461	0.715204	3	11	0.00255755	0.272727	1	1	Not associated
GO Cellular Component	GO:0005793	endoplasmic reticulum-Golgi intermediate compartment	0.0192369	2.17366	4.60054	10	0.0054124	0.0117647	0.0546546	1.92253	4.16119	8	64	0.00682012	0.125	1	1	Not associated
GO Molecular Function	GO:0019829	cation-transporting ATPase activity	0.0192694	2.08177	5.28397	11	0.00621643	0.0129412	0.0241264	2.12957	4.22621	9	65	0.00767263	0.138461	1	1	Not associated
MSigDB Pathway	REACTOME_ANTIVIRAL_MECHANISM_BY_IFN_STIMULATED_GENES	Genes involved in Antiviral mechanism by IFN-stimulated genes	0.0192963	2.28574	3.93745	9	0.0046323	0.0105882	0.416755	1.18309	4.22621	5	65	0.00426258	0.0769231	1	1	Not associated
MSigDB Pathway	REACTOME_INTRINSIC_PATHWAY	Genes involved in Intrinsic Pathway	0.0193966	3.96904	1.0078	4	0.00118565	0.00470588	0.0261297	3.41783	1.17033	4	18	0.00341006	0.222222	1	1	Not associated
GO Molecular Function	GO:0033549	MAP kinase phosphatase activity	0.0195973	3.28182	1.52354	5	0.0017924	0.00588235	0.0105134	4.39435	0.91026	4	14	0.00341006	0.285714	1	1	Not associated
MSigDB Pathway	PID_HIVNEFPATHWAY	HIV-1 Nef: Negative effector of Fas and TNF-alpha	0.0197045	2.87702	2.08549	6	0.00245352	0.00705882	0.177168	1.80944	2.21063	4	34	0.00341006	0.117647	1	1	Not associated
MSigDB Pathway	KEGG_INOSITOL_PHOSPHATE_METABOLISM	Inositol phosphate metabolism	0.0197867	2.16353	4.62207	10	0.00543773	0.0117647	0.0225531	2.27855	3.511	8	54	0.00682012	0.148148	1	1	Not associated
MSigDB Pathway	REACTOME_SIGNALING_BY_RHO_GTPASES	Genes involved in Signaling by Rho GTPases	0.0200106	1.69674	11.198	19	0.0131741	0.0223529	0.033854	1.75388	7.41212	13	114	0.0110827	0.114035	1	1	Not associated
MSigDB Pathway	BIOCARTA_TCR_PATHWAY	T Cell Receptor Signaling Pathway	0.0200144	2.15942	4.63087	10	0.00544808	0.0117647	0.0637209	2.0973	2.86082	6	44	0.00511509	0.136364	1	1	Not associated
GO Molecular Function	GO:0051119	sugar transmembrane transporter activity	0.0200331	3.92947	1.01795	4	0.00119759	0.00470588	0.0508998	2.7964	1.43041	4	22	0.00341006	0.181818	1	1	Not associated
MSigDB Pathway	PID_TELOMERASEPATHWAY	Regulation of Telomerase	0.0200893	1.99414	6.01763	12	0.00707956	0.0141177	0.0313338	2.03562	4.42126	9	68	0.00767263	0.132353	1	1	Not associated
GO Molecular Function	GO:0004457	lactate dehydrogenase activity	0.0203464	9.22544	0.216792	2	0.000255049	0.00235294	0.331975	2.56337	0.390111	1	6	0.000852515	0.166667	1	1	Not associated
MSigDB Pathway	ST_TYPE_I_INTERFERON_PATHWAY	Type I Interferon (alpha/beta IFN) Pathway	0.0203653	5.24774	0.571675	3	0.000672559	0.00352941	0.489548	1.53802	0.650186	1	10	0.000852515	0.1	1	1	Not associated
GO Molecular Function	GO:0003924	GTPase activity	0.0203823	1.58532	15.1389	24	0.0178105	0.0282353	0.116891	1.33162	15.0193	20	231	0.0170503	0.0865801	1	1	Not associated
MSigDB Pathway	PID_ENDOTHELINPATHWAY	Endothelins	0.0205532	1.87274	7.47568	14	0.00879491	0.0164706	0.00226512	2.68544	4.09617	11	63	0.00937766	0.174603	1	1	Not associated
GO Cellular Component	GO:0034774	secretory granule lumen	0.0206139	2.05994	5.33997	11	0.00628232	0.0129412	0.0505742	1.95304	4.09617	8	63	0.00682012	0.126984	1	1	Not associated
GO Cellular Component	GO:0060205	cytoplasmic membrane-bounded vesicle lumen	0.020737	1.98477	6.04603	12	0.00711297	0.0141177	0.0794551	1.70891	5.2665	9	81	0.00767263	0.111111	1	1	Not associated
MSigDB Pathway	BIOCARTA_RANKL_PATHWAY	Bone Remodelling	0.0207825	3.88482	1.02965	4	0.00121135	0.00470588	0.0693903	3.07604	0.975279	3	15	0.00255755	0.2	1	1	Not associated
GO Molecular Function	GO:0035591	signaling adaptor activity	0.0209109	1.86838	7.49312	14	0.00881543	0.0164706	0.0634299	1.86427	4.29123	8	66	0.00682012	0.121212	1	1	Not associated
GO Cellular Component	GO:0030312	external encapsulating structure	0.021101	9.04629	0.221085	2	0.0002601	0.00235294	0.0712839	4.39435	0.45513	2	7	0.00170503	0.285714	1	1	Not associated
MSigDB Pathway	REACTOME_TOLL_RECEPTOR_CASCADES	Genes involved in Toll Receptor Cascades	0.0215954	1.71015	10.5254	18	0.0123829	0.0211765	0.00312142	2.13986	7.47713	16	115	0.0136402	0.13913	1	1	Not associated
MSigDB Pathway	REACTOME_ADAPTIVE_IMMUNE_SYSTEM	Genes involved in Adaptive Immune System	0.0218616	1.35889	35.323	48	0.0415565	0.0564706	0.707662	0.922218	33.6146	31	517	0.026428	0.0599613	1	1	Not associated
MSigDB Pathway	REACTOME_ADENYLATE_CYCLASE_ACTIVATING_PATHWAY	Genes involved in Adenylate cyclase activating pathway	0.0220284	3.18158	1.57155	5	0.00184888	0.00588235	0.023294	4.61407	0.650186	3	10	0.00255755	0.3	1	1	Not associated
MSigDB Pathway	BIOCARTA_IL4_PATHWAY	IL 4 signaling pathway	0.0224469	5.0533	0.593672	3	0.000698437	0.00352941	0.522756	1.3982	0.715204	1	11	0.000852515	0.0909091	1	1	Not associated
MSigDB Pathway	ST_INTERLEUKIN_13_PATHWAY	Interleukin 13 (IL-13) Pathway	0.0225186	5.04704	0.594408	3	0.000699304	0.00352941	0.375423	2.19718	0.45513	1	7	0.000852515	0.142857	1	1	Not associated
MSigDB Pathway	ST_IL_13_PATHWAY	Interleukin 13 (IL-13) Pathway	0.0225186	5.04704	0.594408	3	0.000699304	0.00352941	0.375423	2.19718	0.45513	1	7	0.000852515	0.142857	1	1	Not associated
MSigDB Pathway	PID_NOTCH_PATHWAY	Notch signaling pathway	0.0225238	1.96043	6.1211	12	0.00720129	0.0141177	0.0331455	2.12141	3.77108	8	58	0.00682012	0.137931	1	1	Not associated
GO Cellular Component	GO:0044452	nucleolar part	0.0227137	3.77841	1.05865	4	0.00124547	0.00470588	0.190478	1.75774	2.27565	4	35	0.00341006	0.114286	1	1	Not associated
MSigDB Pathway	KEGG_SPLICEOSOME	Spliceosome	0.0227891	2.0276	5.42513	11	0.00638251	0.0129412	0.295065	1.23042	8.12732	10	125	0.00852515	0.08	1	1	Not associated
GO Molecular Function	GO:0005523	tropomyosin binding	0.0229964	3.76378	1.06276	4	0.00125031	0.00470588	0.25468	2.0507	0.975279	2	15	0.00170503	0.133333	1	1	Not associated
GO Cellular Component	GO:0031982	vesicle	0.0230371	1.21471	85.6171	104	0.100726	0.122353	0.242666	1.08432	70.09	76	1078	0.0647911	0.0705009	1	1	Not associated
GO Cellular Component	GO:0005635	nuclear envelope	0.0230705	1.41322	26.8889	38	0.031634	0.0447059	0.0941312	1.30587	20.6759	27	318	0.0230179	0.0849057	1	1	Not associated
GO Cellular Component	GO:0044448	cell cortex part	0.0231243	1.843	7.59633	14	0.00893686	0.0164706	0.126353	1.50787	6.63189	10	102	0.00852515	0.0980392	1	1	Not associated
GO Molecular Function	GO:0042625	ATPase activity, coupled to transmembrane movement of ions	0.023167	2.02231	5.43931	11	0.00639919	0.0129412	0.0287837	2.066	4.35624	9	67	0.00767263	0.134328	1	1	Not associated
MSigDB Pathway	KEGG_FC_EPSILON_RI_SIGNALING_PATHWAY	Fc epsilon RI signaling pathway	0.0231836	1.95195	6.1477	12	0.00723259	0.0141177	0.0701442	1.75218	5.13647	9	79	0.00767263	0.113924	1	1	Not associated
GO Molecular Function	GO:0015932	nucleobase-containing compound transmembrane transporter activity	0.0233798	3.13136	1.59675	5	0.00187853	0.00588235	0.105267	2.19718	1.82052	4	28	0.00341006	0.142857	1	1	Not associated
MSigDB Pathway	KEGG_LEISHMANIA_INFECTION	Leishmania infection	0.0238174	2.09734	4.76793	10	0.00560933	0.0117647	0.16019	1.56031	4.48628	7	69	0.0059676	0.101449	1	1	Not associated
MSigDB Pathway	PID_AVB3_OPN_PATHWAY	Osteopontin-mediated events	0.0238783	2.50707	2.79211	7	0.00328483	0.00823529	0.0115052	3.07604	1.95056	6	30	0.00511509	0.2	1	1	Not associated
MSigDB Pathway	KEGG_CYTOSOLIC_DNA_SENSING_PATHWAY	Cytosolic DNA-sensing pathway	0.0239733	3.11037	1.60753	5	0.00189121	0.00588235	0.498214	1.09859	3.64104	4	56	0.00341006	0.0714286	1	1	Not associated
MSigDB Pathway	REACTOME_TERMINATION_OF_O_GLYCAN_BIOSYNTHESIS	Genes involved in Termination of O-glycan biosynthesis	0.0239847	3.10997	1.60773	5	0.00189145	0.00588235	0.152822	2.19718	1.36539	3	21	0.00255755	0.142857	1	1	Not associated
MSigDB Pathway	KEGG_B_CELL_RECEPTOR_SIGNALING_PATHWAY	B cell receptor signaling pathway	0.0242567	1.93867	6.18981	12	0.00728213	0.0141177	0.119731	1.61897	4.94141	8	76	0.00682012	0.105263	1	1	Not associated
MSigDB Pathway	KEGG_P53_SIGNALING_PATHWAY	p53 signaling pathway	0.024449	1.93636	6.19721	12	0.00729083	0.0141177	0.0313338	2.03562	4.42126	9	68	0.00767263	0.132353	1	1	Not associated
MSigDB Pathway	BIOCARTA_AKAP13_PATHWAY	Rho-Selective Guanine Exchange Factor AKAP13 Mediates Stress Fiber Formation	0.0245166	3.68872	1.08439	4	0.00127575	0.00470588	0.0387552	3.84505	0.780223	3	12	0.00255755	0.25	1	1	Not associated
GO Molecular Function	GO:0042054	histone methyltransferase activity	0.024566	2.18887	4.11171	9	0.0048373	0.0105882	0.104022	1.84563	3.25093	6	50	0.00511509	0.12	1	1	Not associated
GO Cellular Component	GO:0005952	cAMP-dependent protein kinase complex	0.0246309	4.87346	0.615579	3	0.000724211	0.00352941	0.454033	1.70891	0.585167	1	9	0.000852515	0.111111	1	1	Not associated
MSigDB Pathway	BIOCARTA_IL10_PATHWAY	IL-10 Anti-inflammatory Signaling Pathway	0.025297	4.82277	0.622049	3	0.000731822	0.00352941	0.68127	0.904719	1.10532	1	17	0.000852515	0.0588235	1	1	Not associated
GO Cellular Component	GO:0044432	endoplasmic reticulum part	0.0253236	1.24272	66.7892	83	0.0785755	0.0976471	0.271984	1.07989	61.1174	66	940	0.056266	0.0702128	1	1	Not associated
MSigDB Pathway	REACTOME_RIG_I_MDA5_MEDIATED_INDUCTION_OF_IFN_ALPHA_BETA_PATHWAYS	Genes involved in RIG-I/MDA5 mediated induction of IFN-alpha/beta pathways	0.0256485	2.29982	3.47854	8	0.0040924	0.00941177	0.32622	1.28168	4.68134	6	72	0.00511509	0.0833333	1	1	Not associated
GO Molecular Function	GO:0008469	histone-arginine N-methyltransferase activity	0.0257079	4.79238	0.625994	3	0.000736463	0.00352941	0.375423	2.19718	0.45513	1	7	0.000852515	0.142857	1	1	Not associated
MSigDB Pathway	PID_AR_PATHWAY	Coregulation of Androgen receptor activity	0.0257908	1.86404	6.97411	13	0.00820484	0.0152941	0.00065422	2.92957	4.09617	12	63	0.0102302	0.190476	1	1	Not associated
GO Cellular Component	GO:0005747	mitochondrial respiratory chain complex I	0.0258753	3.04705	1.64093	5	0.00193051	0.00588235	0.350542	1.33741	2.99085	4	46	0.00341006	0.0869565	1	1	Not associated
GO Molecular Function	GO:0042626	ATPase activity, coupled to transmembrane movement of substances	0.0260723	1.81279	7.7229	14	0.00908577	0.0164706	0.0148348	1.96022	6.63189	13	102	0.0110827	0.127451	1	1	Not associated
MSigDB Pathway	BIOCARTA_PPARA_PATHWAY	Mechanism of Gene Regulation by Peroxisome Proliferators via PPARa(alpha)	0.0261978	1.91613	6.26262	12	0.00736779	0.0141177	0.0331455	2.12141	3.77108	8	58	0.00682012	0.137931	1	1	Not associated
GO Molecular Function	GO:0008137	NADH dehydrogenase (ubiquinone) activity	0.0264051	3.03038	1.64996	5	0.00194112	0.00588235	0.365626	1.30896	3.05587	4	47	0.00341006	0.0851064	1	1	Not associated
MSigDB Pathway	BIOCARTA_IL22BP_PATHWAY	IL22 Soluble Receptor Signaling Pathway	0.0264436	4.73954	0.632973	3	0.000744674	0.00352941	0.659084	0.961264	1.0403	1	16	0.000852515	0.0625	1	1	Not associated
GO Molecular Function	GO:0032183	SUMO binding	0.0265354	3.59749	1.11189	4	0.0013081	0.00470588	0.157476	2.7964	0.715204	2	11	0.00170503	0.181818	1	1	Not associated
MSigDB Pathway	PID_IL2_PI3KPATHWAY	IL2 signaling events mediated by PI3K	0.0268985	2.44378	2.86441	7	0.0033699	0.00823529	0.177168	1.80944	2.21063	4	34	0.00341006	0.117647	1	1	Not associated
GO Molecular Function	GO:0004857	enzyme inhibitor activity	0.026932	1.4358	22.9837	33	0.0270396	0.0388235	0.152782	1.23804	21.001	26	323	0.0221654	0.0804954	1	1	Not associated
GO Cellular Component	GO:0042175	nuclear outer membrane-endoplasmic reticulum membrane network	0.0270451	1.26154	57.0732	72	0.067145	0.0847059	0.225607	1.10676	52.405	58	806	0.0494459	0.0719603	1	1	Not associated
MSigDB Pathway	BIOCARTA_MCALPAIN_PATHWAY	mCalpain and friends in Cell motility	0.0272685	2.66461	2.25174	6	0.0026491	0.00705882	0.219712	1.84563	1.62546	3	25	0.00255755	0.12	1	1	Not associated
MSigDB Pathway	BIOCARTA_CFTR_PATHWAY	Cystic Fibrosis Transmembrane Conductance Regulator And Beta 2 Adrenergic Receptor Pathway	0.0275309	3.55561	1.12498	4	0.00132351	0.00470588	0.18122	2.56337	0.780223	2	12	0.00170503	0.166667	1	1	Not associated
GO Molecular Function	GO:0016820	hydrolase activity, acting on acid anhydrides, catalyzing transmembrane movement of substances	0.0275837	1.79863	7.78372	14	0.00915731	0.0164706	0.0185415	1.90422	6.82695	13	105	0.0110827	0.12381	1	1	Not associated
GO Molecular Function	GO:0043295	glutathione binding	0.0276131	7.81904	0.255786	2	0.000300925	0.00235294	0.112172	3.41783	0.585167	2	9	0.00170503	0.222222	1	1	Not associated
MSigDB Pathway	PID_IL2_1PATHWAY	IL2-mediated signaling events	0.0278682	2.04184	4.89753	10	0.0057618	0.0117647	0.0249397	2.23712	3.57602	8	55	0.00682012	0.145454	1	1	Not associated
GO Molecular Function	GO:0015114	phosphate ion transmembrane transporter activity	0.0279693	4.63591	0.647122	3	0.000761319	0.00352941	0.229975	2.19718	0.91026	2	14	0.00170503	0.142857	1	1	Not associated
GO Molecular Function	GO:0005543	phospholipid binding	0.0280201	1.2714	52.698	67	0.0619977	0.0788235	6.66872e-05	1.70216	32.8994	56	506	0.0477408	0.110672	1	0.115035	Not associated
GO Cellular Component	GO:0031227	intrinsic to endoplasmic reticulum membrane	0.0280282	1.8964	6.32777	12	0.00744443	0.0141177	0.0969272	1.55213	7.08702	11	109	0.00937766	0.100917	1	1	Not associated
MSigDB Pathway	KEGG_HEDGEHOG_SIGNALING_PATHWAY	Hedgehog signaling pathway	0.0280991	1.8409	7.06178	13	0.00830797	0.0152941	0.0696626	1.92253	3.64104	7	56	0.0059676	0.125	1	1	Not associated
GO Molecular Function	GO:0043492	ATPase activity, coupled to movement of substances	0.0281385	1.79362	7.80542	14	0.00918285	0.0164706	0.0160012	1.94119	6.69691	13	103	0.0110827	0.126214	1	1	Not associated
GO Cellular Component	GO:0033180	proton-transporting V-type ATPase, V1 domain	0.0282647	4.61672	0.649812	3	0.000764485	0.00352941	0.0171214	5.12674	0.585167	3	9	0.00255755	0.333333	1	1	Not associated
GO Molecular Function	GO:0016773	phosphotransferase activity, alcohol group as acceptor	0.0285141	1.23921	65.3642	81	0.076899	0.0952941	0.0101908	1.34686	46.0331	62	708	0.0528559	0.0875706	1	1	Not associated
MSigDB Pathway	BIOCARTA_NUCLEARRS_PATHWAY	Nuclear Receptors in Lipid Metabolism and Toxicity	0.0285647	4.59749	0.652531	3	0.000767683	0.00352941	0.0105134	4.39435	0.91026	4	14	0.00341006	0.285714	1	1	Not associated
GO Molecular Function	GO:0015296	anion:cation symporter activity	0.0287542	2.24833	3.5582	8	0.00418612	0.00941177	0.0893741	1.92253	3.12089	6	48	0.00511509	0.125	1	1	Not associated
MSigDB Pathway	KEGG_METABOLISM_OF_XENOBIOTICS_BY_CYTOCHROME_P450	Metabolism of xenobiotics by cytochrome P450	0.028755	2.63083	2.28065	6	0.00268312	0.00705882	0.302975	1.31831	4.5513	6	70	0.00511509	0.0857143	1	1	Not associated
GO Molecular Function	GO:0005086	ARF guanyl-nucleotide exchange factor activity	0.0289001	2.95688	1.69097	5	0.00198938	0.00588235	0.0314395	3.23794	1.23535	4	19	0.00341006	0.210526	1	1	Not associated
MSigDB Pathway	REACTOME_MEMBRANE_TRAFFICKING	Genes involved in Membrane Trafficking	0.0290677	1.83176	7.09699	13	0.0083494	0.0152941	0.597638	0.961264	8.32238	8	128	0.00682012	0.0625	1	1	Not associated
GO Molecular Function	GO:0005089	Rho guanyl-nucleotide exchange factor activity	0.029115	1.78506	7.84288	14	0.00922692	0.0164706	0.0536499	1.84563	4.87639	9	75	0.00767263	0.12	1	1	Not associated
GO Cellular Component	GO:0044440	endosomal part	0.0292033	1.39477	26.5277	37	0.031209	0.0435294	0.117591	1.26661	22.1063	28	340	0.0238704	0.0823529	1	1	Not associated
GO Molecular Function	GO:0042975	peroxisome proliferator activated receptor binding	0.0293644	4.54751	0.659701	3	0.000776119	0.00352941	0.416048	1.92253	0.520149	1	8	0.000852515	0.125	1	1	Not associated
MSigDB Pathway	KEGG_PYRIMIDINE_METABOLISM	Pyrimidine metabolism	0.0295225	1.94486	5.65593	11	0.00665404	0.0129412	0.109399	1.55356	6.43684	10	99	0.00852515	0.10101	1	1	Not associated
GO Molecular Function	GO:0008266	poly(U) RNA binding	0.0296667	3.47174	1.15216	4	0.00135548	0.00470588	0.416048	1.92253	0.520149	1	8	0.000852515	0.125	1	1	Not associated
MSigDB Pathway	REACTOME_THE_NLRP3_INFLAMMASOME	Genes involved in The NLRP3 inflammasome	0.0301289	4.5014	0.66646	3	0.00078407	0.00352941	0.157476	2.7964	0.715204	2	11	0.00170503	0.181818	1	1	Not associated
MSigDB Pathway	REACTOME_SYNTHESIS_OF_VERY_LONG_CHAIN_FATTY_ACYL_COAS	Genes involved in Synthesis of very long-chain fatty acyl-CoAs	0.0302267	3.45099	1.15909	4	0.00136363	0.00470588	0.0582344	3.29576	0.91026	3	14	0.00255755	0.214286	1	1	Not associated
MSigDB Pathway	REACTOME_TRAF6_MEDIATED_NFKB_ACTIVATION	Genes involved in TRAF6 mediated NF-kB activation	0.0302296	3.45088	1.15912	4	0.00136368	0.00470588	0.400469	1.46478	1.36539	2	21	0.00170503	0.0952381	1	1	Not associated
MSigDB Pathway	PID_RETINOIC_ACID_PATHWAY	Retinoic acid receptors-mediated signaling	0.0302443	2.38231	2.93833	7	0.00345686	0.00823529	0.0422759	2.56337	1.95056	5	30	0.00426258	0.166667	1	1	Not associated
GO Cellular Component	GO:0005902	microvillus	0.0303955	1.87278	6.40759	12	0.00753834	0.0141177	0.0340368	2.00612	4.48628	9	69	0.00767263	0.130435	1	1	Not associated
GO Molecular Function	GO:1901677	phosphate transmembrane transporter activity	0.030507	3.44077	1.16253	4	0.00136768	0.00470588	0.122263	2.42846	1.23535	3	19	0.00255755	0.157895	1	1	Not associated
MSigDB Pathway	ST_PHOSPHOINOSITIDE_3_KINASE_PATHWAY	PI3K Pathway	0.0305237	2.37752	2.94425	7	0.00346382	0.00823529	0.217975	1.66273	2.40569	4	37	0.00341006	0.108108	1	1	Not associated
MSigDB Pathway	REACTOME_TRIF_MEDIATED_TLR3_SIGNALING	Genes involved in TRIF mediated TLR3 signaling	0.0307924	1.869	6.42053	12	0.00755356	0.0141177	0.0176396	2.13614	4.68134	10	72	0.00852515	0.138889	1	1	Not associated
MSigDB Pathway	REACTOME_MRNA_SPLICING	Genes involved in mRNA Splicing	0.0307929	2.21772	3.60731	8	0.0042439	0.00941177	0.394552	1.14992	6.95699	8	107	0.00682012	0.0747664	1	1	Not associated
GO Cellular Component	GO:0005759	mitochondrial matrix	0.0314909	1.47741	18.2752	27	0.0215003	0.0317647	0.529845	1.00197	19.9607	20	307	0.0170503	0.0651466	1	1	Not associated
GO Cellular Component	GO:0010008	endosome membrane	0.0322538	1.39075	25.8852	36	0.0304532	0.0423529	0.132528	1.25458	21.5211	27	331	0.0230179	0.081571	1	1	Not associated
MSigDB Pathway	BIOCARTA_INFLAM_PATHWAY	Cytokines and Inflammatory Response	0.0324618	2.5546	2.34871	6	0.00276319	0.00705882	0.116167	2.12141	1.88554	4	29	0.00341006	0.137931	1	1	Not associated
GO Molecular Function	GO:0019904	protein domain specific binding	0.0325504	1.26318	52.2493	66	0.0614697	0.0776471	0.0027144	1.48656	34.98	52	538	0.0443308	0.0966543	1	1	Not associated
GO Molecular Function	GO:0008094	DNA-dependent ATPase activity	0.0330006	1.90955	5.76052	11	0.00677708	0.0129412	0.186338	1.4953	4.68134	7	72	0.0059676	0.0972222	1	1	Not associated
MSigDB Pathway	REACTOME_TRANSPORT_OF_GLUCOSE_AND_OTHER_SUGARS_BILE_SALTS_AND_ORGANIC_ACIDS_METAL_IONS_AND_AMINE_COMPOUNDS	Genes involved in Transport of glucose and other sugars, bile salts and organic acids, metal ions and amine compounds	0.0332217	1.79582	7.23903	13	0.00851651	0.0152941	0.358129	1.20968	5.78665	7	89	0.0059676	0.0786517	1	1	Not associated
MSigDB Pathway	BIOCARTA_PML_PATHWAY	Regulation of transcriptional activity by PML	0.0334975	3.33852	1.19813	4	0.00140957	0.00470588	0.0942905	2.71416	1.10532	3	17	0.00255755	0.176471	1	1	Not associated
MSigDB Pathway	REACTOME_REGULATION_OF_IFNG_SIGNALING	Genes involved in Regulation of IFNG signaling	0.0335043	3.3383	1.19821	4	0.00140966	0.00470588	0.205441	2.36619	0.845241	2	13	0.00170503	0.153846	1	1	Not associated
MSigDB Pathway	KEGG_LINOLEIC_ACID_METABOLISM	Linoleic acid metabolism	0.0335382	3.33721	1.19861	4	0.00141012	0.00470588	0.105267	2.19718	1.82052	4	28	0.00341006	0.142857	1	1	Not associated
GO Molecular Function	GO:0005083	small GTPase regulator activity	0.0341234	1.36463	28.5791	39	0.0336225	0.0458824	0.0118681	1.53308	20.2208	31	311	0.026428	0.0996785	1	1	Not associated
MSigDB Pathway	PID_IL2_STAT5PATHWAY	IL2 signaling events mediated by STAT5	0.034158	2.52295	2.37817	6	0.00279784	0.00705882	0.127535	2.0507	1.95056	4	30	0.00341006	0.133333	1	1	Not associated
MSigDB Pathway	REACTOME_ADVANCED_GLYCOSYLATION_ENDPRODUCT_RECEPTOR_SIGNALING	Genes involved in Advanced glycosylation endproduct receptor signaling	0.0342845	4.27527	0.70171	3	0.000825541	0.00352941	0.205441	2.36619	0.845241	2	13	0.00170503	0.153846	1	1	Not associated
GO Molecular Function	GO:0035259	glucocorticoid receptor binding	0.0344664	3.30779	1.20927	4	0.00142267	0.00470588	0.0910495	3.84505	0.520149	2	8	0.00170503	0.25	1	1	Not associated
MSigDB Pathway	KEGG_PHOSPHATIDYLINOSITOL_SIGNALING_SYSTEM	Phosphatidylinositol signaling system	0.034529	1.78545	7.28106	13	0.00856596	0.0152941	0.010761	2.19718	5.00643	11	77	0.00937766	0.142857	1	1	Not associated
GO Molecular Function	GO:0008289	lipid binding	0.034656	1.21844	70.582	86	0.0830376	0.101177	0.000419334	1.48709	49.089	73	755	0.0622336	0.0966887	1	0.723351	Not associated
MSigDB Pathway	BIOCARTA_SKP2E2F_PATHWAY	E2F1 Destruction Pathway	0.0347309	4.25315	0.70536	3	0.000829835	0.00352941	0.023294	4.61407	0.650186	3	10	0.00255755	0.3	1	1	Not associated
GO Molecular Function	GO:0016812	hydrolase activity, acting on carbon-nitrogen (but not peptide) bonds, in cyclic amides	0.0347394	4.25273	0.705429	3	0.000829917	0.00352941	0.134391	3.07604	0.650186	2	10	0.00170503	0.2	1	1	Not associated
GO Molecular Function	GO:0070577	histone acetyl-lysine binding	0.0349617	3.29248	1.21489	4	0.00142928	0.00470588	0.304116	1.80944	1.10532	2	17	0.00170503	0.117647	1	1	Not associated
GO Molecular Function	GO:0015144	carbohydrate transmembrane transporter activity	0.0350992	3.28828	1.21644	4	0.00143111	0.00470588	0.0948607	2.27855	1.7555	4	27	0.00341006	0.148148	1	1	Not associated
MSigDB Pathway	PID_ARF6_PATHWAY	Arf6 signaling events	0.0351017	2.1597	3.70422	8	0.00435791	0.00941177	0.0238904	2.63661	2.27565	6	35	0.00511509	0.171429	1	1	Not associated
MSigDB Pathway	REACTOME_SEMA4D_INDUCED_CELL_MIGRATION_AND_GROWTH_CONE_COLLAPSE	Genes involved in Sema4D induced cell migration and growth-cone collapse	0.0351598	3.28644	1.21712	4	0.00143191	0.00470588	0.20242	1.92253	1.56045	3	24	0.00255755	0.125	1	1	Not associated
GO Molecular Function	GO:0030234	enzyme regulator activity	0.0358601	1.19775	82.6552	99	0.0972414	0.116471	0.0244783	1.2441	64.3034	80	989	0.0682012	0.0808898	1	1	Not associated
MSigDB Pathway	SIG_BCR_SIGNALING_PATHWAY	Members of the BCR signaling pathway	0.0358996	2.04007	4.41162	9	0.00519014	0.0105882	0.075932	2.00612	2.99085	6	46	0.00511509	0.130435	1	1	Not associated
GO Molecular Function	GO:0004860	protein kinase inhibitor activity	0.0359017	1.95336	5.11939	10	0.00602281	0.0117647	0.136763	1.70891	3.511	6	54	0.00511509	0.111111	1	1	Not associated
MSigDB Pathway	REACTOME_REGULATION_OF_KIT_SIGNALING	Genes involved in Regulation of KIT signaling	0.036209	2.7784	1.7996	5	0.00211717	0.00588235	0.0814271	2.88379	1.0403	3	16	0.00255755	0.1875	1	1	Not associated
MSigDB Pathway	REACTOME_METABOLISM_OF_RNA	Genes involved in Metabolism of RNA	0.0362753	1.58364	11.9977	19	0.0141149	0.0223529	0.620868	0.950129	16.8398	16	259	0.0136402	0.0617761	1	1	Not associated
MSigDB Pathway	REACTOME_GPVI_MEDIATED_ACTIVATION_CASCADE	Genes involved in GPVI-mediated activation cascade	0.0363925	2.28686	3.06096	7	0.00360113	0.00823529	0.151573	1.92253	2.08059	4	32	0.00341006	0.125	1	1	Not associated
GO Molecular Function	GO:0052745	inositol phosphate phosphatase activity	0.036439	3.24838	1.23138	4	0.00144869	0.00470588	0.0942905	2.71416	1.10532	3	17	0.00255755	0.176471	1	1	Not associated
GO Cellular Component	GO:0030176	integral to endoplasmic reticulum membrane	0.0364659	1.87802	5.85722	11	0.00689085	0.0129412	0.126353	1.50787	6.63189	10	102	0.00852515	0.0980392	1	1	Not associated
GO Molecular Function	GO:0005344	oxygen transporter activity	0.0365549	6.70233	0.298404	2	0.000351063	0.00235294	0.00140539	5.49294	0.91026	5	14	0.00426258	0.357143	1	1	Not associated
MSigDB Pathway	REACTOME_G_ALPHA1213_SIGNALLING_EVENTS	Genes involved in G alpha (12/13) signalling events	0.0370728	1.81516	6.61099	12	0.00777764	0.0141177	0.204679	1.45489	4.81137	7	74	0.0059676	0.0945946	1	1	Not associated
GO Molecular Function	GO:0005436	sodium:phosphate symporter activity	0.0373598	6.62196	0.302025	2	0.000355324	0.00235294	0.416048	1.92253	0.520149	1	8	0.000852515	0.125	1	1	Not associated
MSigDB Pathway	REACTOME_REGULATORY_RNA_PATHWAYS	Genes involved in Regulatory RNA pathways	0.0375388	3.21695	1.24341	4	0.00146284	0.00470588	0.490109	1.23042	1.62546	2	25	0.00170503	0.08	1	1	Not associated
GO Molecular Function	GO:0008329	signaling pattern recognition receptor activity	0.0375747	3.21595	1.2438	4	0.0014633	0.00470588	0.0814271	2.88379	1.0403	3	16	0.00255755	0.1875	1	1	Not associated
GO Cellular Component	GO:0005765	lysosomal membrane	0.0378178	1.5193	14.4803	22	0.0170357	0.0258823	0.202497	1.23301	15.4094	19	237	0.0161978	0.0801688	1	1	Not associated
GO Cellular Component	GO:0016023	cytoplasmic membrane-bounded vesicle	0.0378449	1.20697	74.5667	90	0.0877255	0.105882	0.21826	1.10217	59.8821	66	921	0.056266	0.0716612	1	1	Not associated
GO Cellular Component	GO:0005743	mitochondrial inner membrane	0.0379945	1.42942	20.2879	29	0.0238682	0.0341176	0.390418	1.06921	24.3169	26	374	0.0221654	0.0695187	1	1	Not associated
MSigDB Pathway	BIOCARTA_MAPK_PATHWAY	MAPKinase Signaling Pathway	0.0380217	1.7596	7.38804	13	0.00869181	0.0152941	0.0251378	1.94463	5.65662	11	87	0.00937766	0.126437	1	1	Not associated
GO Cellular Component	GO:0005813	centrosome	0.0380959	1.35879	27.9661	38	0.0329013	0.0447059	0.228452	1.15641	25.9424	30	399	0.0255754	0.075188	1	1	Not associated
MSigDB Pathway	BIOCARTA_P27_PATHWAY	Regulation of p27 Phosphorylation during Cell Cycle Progression	0.0381479	4.0954	0.73253	3	0.0008618	0.00352941	0.0582344	3.29576	0.91026	3	14	0.00255755	0.214286	1	1	Not associated
GO Molecular Function	GO:0072341	modified amino acid binding	0.0381846	2.26238	3.09409	7	0.00364011	0.00823529	0.0580806	2.14608	2.7958	6	43	0.00511509	0.139535	1	1	Not associated
MSigDB Pathway	BIOCARTA_DREAM_PATHWAY	Repression of Pain Sensation by the Transcriptional Regulator DREAM	0.0381856	3.19899	1.25039	4	0.00147105	0.00470588	0.229975	2.19718	0.91026	2	14	0.00170503	0.142857	1	1	Not associated
GO Cellular Component	GO:0014731	spectrin-associated cytoskeleton	0.0384258	4.08339	0.734684	3	0.000864333	0.00352941	0.416048	1.92253	0.520149	1	8	0.000852515	0.125	1	1	Not associated
GO Molecular Function	GO:0015145	monosaccharide transmembrane transporter activity	0.0384945	4.08044	0.735215	3	0.000864959	0.00352941	0.0693903	3.07604	0.975279	3	15	0.00255755	0.2	1	1	Not associated
GO Cellular Component	GO:0070938	contractile ring	0.0385284	4.07899	0.735477	3	0.000865267	0.00352941	0.112172	3.41783	0.585167	2	9	0.00170503	0.222222	1	1	Not associated
MSigDB Pathway	REACTOME_NGF_SIGNALLING_VIA_TRKA_FROM_THE_PLASMA_MEMBRANE	Genes involved in NGF signalling via TRKA from the plasma membrane	0.0385367	1.5517	12.8891	20	0.0151637	0.0235294	0.0293327	1.70891	8.77751	15	135	0.0127877	0.111111	1	1	Not associated
MSigDB Pathway	BIOCARTA_TOB1_PATHWAY	Role of Tob in T-cell activation	0.0388343	2.72442	1.83526	5	0.00215912	0.00588235	0.0314395	3.23794	1.23535	4	19	0.00341006	0.210526	1	1	Not associated
MSigDB Pathway	KEGG_PURINE_METABOLISM	Purine metabolism	0.0388771	1.57039	12.0989	19	0.014234	0.0223529	0.09785	1.4419	10.403	15	160	0.0127877	0.09375	1	1	Not associated
GO Cellular Component	GO:0031970	organelle envelope lumen	0.038909	2.25284	3.10719	7	0.00365552	0.00823529	0.55334	1.02535	3.90111	4	60	0.00341006	0.0666667	1	1	Not associated
MSigDB Pathway	REACTOME_M_G1_TRANSITION	Genes involved in M/G1 Transition	0.0394578	2.10841	3.79433	8	0.00446391	0.00941177	0.147861	1.53802	5.20149	8	80	0.00682012	0.1	1	1	Not associated
GO Cellular Component	GO:0033178	proton-transporting two-sector ATPase complex, catalytic domain	0.0395765	4.03488	0.743516	3	0.000874725	0.00352941	0.0942905	2.71416	1.10532	3	17	0.00255755	0.176471	1	1	Not associated
MSigDB Pathway	BIOCARTA_ETS_PATHWAY	METS affect on Macrophage Differentiation	0.0395849	2.70977	1.84518	5	0.0021708	0.00588235	0.107923	2.56337	1.17033	3	18	0.00255755	0.166667	1	1	Not associated
MSigDB Pathway	BIOCARTA_RARRXR_PATHWAY	Nuclear receptors coordinate the activities of chromatin remodeling complexes and coactivators to facilitate initiation of transcription in carcinoma cells	0.0395998	3.161	1.26542	4	0.00148873	0.00470588	0.25468	2.0507	0.975279	2	15	0.00170503	0.133333	1	1	Not associated
MSigDB Pathway	REACTOME_EGFR_DOWNREGULATION	Genes involved in EGFR downregulation	0.0396592	2.43143	2.46768	6	0.00290316	0.00705882	0.0173598	3.20421	1.56045	5	24	0.00426258	0.208333	1	1	Not associated
GO Molecular Function	GO:0004602	glutathione peroxidase activity	0.0397649	4.02711	0.744951	3	0.000876412	0.00352941	0.0942905	2.71416	1.10532	3	17	0.00255755	0.176471	1	1	Not associated
MSigDB Pathway	ST_FAS_SIGNALING_PATHWAY	Fas Signaling Pathway	0.0398216	2.10441	3.80154	8	0.0044724	0.00941177	0.235563	1.4419	4.16119	6	64	0.00511509	0.09375	1	1	Not associated
MSigDB Pathway	REACTOME_UNWINDING_OF_DNA	Genes involved in Unwinding of DNA	0.0398586	6.38811	0.313082	2	0.000368332	0.00235294	0.157476	2.7964	0.715204	2	11	0.00170503	0.181818	1	1	Not associated
MSigDB Pathway	PID_ILK_PATHWAY	Integrin-linked kinase signaling	0.0409286	2.09247	3.82324	8	0.00449792	0.00941177	0.0696716	2.0507	2.92584	6	45	0.00511509	0.133333	1	1	Not associated
GO Cellular Component	GO:0005925	focal adhesion	0.0412797	1.60507	10.5914	17	0.0124605	0.02	0.232287	1.29147	8.51743	11	131	0.00937766	0.0839695	1	1	Not associated
MSigDB Pathway	REACTOME_ASSEMBLY_OF_THE_PRE_REPLICATIVE_COMPLEX	Genes involved in Assembly of the pre-replicative complex	0.0417312	2.40064	2.49934	6	0.0029404	0.00705882	0.246485	1.41971	4.22621	6	65	0.00511509	0.0923077	1	1	Not associated
GO Molecular Function	GO:0008656	cysteine-type endopeptidase activator activity involved in apoptotic process	0.0418342	3.10425	1.28855	4	0.00151595	0.00470588	0.122263	2.42846	1.23535	3	19	0.00255755	0.157895	1	1	Not associated
MSigDB Pathway	REACTOME_FATTY_ACYL_COA_BIOSYNTHESIS	Genes involved in Fatty Acyl-CoA Biosynthesis	0.0421817	3.09576	1.29209	4	0.0015201	0.00470588	0.107923	2.56337	1.17033	3	18	0.00255755	0.166667	1	1	Not associated
GO Cellular Component	GO:0002080	acrosomal membrane	0.0423814	3.92406	0.764515	3	0.000899429	0.00352941	0.659084	0.961264	1.0403	1	16	0.000852515	0.0625	1	1	Not associated
MSigDB Pathway	PID_IFNGPATHWAY	IFN-gamma pathway	0.0424854	2.07625	3.8531	8	0.00453305	0.00941177	0.0477296	2.25076	2.66576	6	41	0.00511509	0.146342	1	1	Not associated
MSigDB Pathway	REACTOME_CDK_MEDIATED_PHOSPHORYLATION_AND_REMOVAL_OF_CDC6	Genes involved in CDK-mediated phosphorylation and removal of Cdc6	0.042642	2.65329	1.88445	5	0.002217	0.00588235	0.199909	1.60211	3.12089	5	48	0.00426258	0.104167	1	1	Not associated
MSigDB Pathway	REACTOME_ADENYLATE_CYCLASE_INHIBITORY_PATHWAY	Genes involved in Adenylate cyclase inhibitory pathway	0.0427669	2.65109	1.88602	5	0.00221884	0.00588235	0.0480085	3.54928	0.845241	3	13	0.00255755	0.230769	1	1	Not associated
MSigDB Pathway	REACTOME_NFKB_AND_MAP_KINASES_ACTIVATION_MEDIATED_BY_TLR4_SIGNALING_REPERTOIRE	Genes involved in NFkB and MAP kinases activation mediated by TLR4 signaling repertoire	0.0431785	1.77112	6.77537	12	0.00797102	0.0141177	0.0146563	2.19718	4.5513	10	70	0.00852515	0.142857	1	1	Not associated
MSigDB Pathway	BIOCARTA_TALL1_PATHWAY	TACI and BCMA stimulation of B cell immune responses.	0.043344	3.88824	0.771558	3	0.000907715	0.00352941	0.229975	2.19718	0.91026	2	14	0.00170503	0.142857	1	1	Not associated
GO Molecular Function	GO:0019887	protein kinase regulator activity	0.0433944	1.59454	10.6614	17	0.0125428	0.02	0.111756	1.51056	7.28208	11	112	0.00937766	0.0982143	1	1	Not associated
GO Molecular Function	GO:0019210	kinase inhibitor activity	0.0435536	1.88662	5.30048	10	0.00623586	0.0117647	0.164099	1.61897	3.70606	6	57	0.00511509	0.105263	1	1	Not associated
GO Cellular Component	GO:0031430	M band	0.0438491	2.63229	1.89949	5	0.00223469	0.00588235	0.107923	2.56337	1.17033	3	18	0.00255755	0.166667	1	1	Not associated
MSigDB Pathway	REACTOME_TAK1_ACTIVATES_NFKB_BY_PHOSPHORYLATION_AND_ACTIVATION_OF_IKKS_COMPLEX	Genes involved in TAK1 activates NFkB by phosphorylation and activation of IKKs complex	0.0440441	2.62896	1.90189	5	0.00223752	0.00588235	0.185468	2.00612	1.49543	3	23	0.00255755	0.130435	1	1	Not associated
GO Cellular Component	GO:0005768	endosome	0.0440554	1.25308	48.6799	61	0.0572705	0.0717647	0.143012	1.17523	39.1412	46	602	0.0392157	0.076412	1	1	Not associated
GO Molecular Function	GO:0070403	NAD+ binding	0.0441885	3.85766	0.777673	3	0.000914909	0.00352941	0.0387552	3.84505	0.780223	3	12	0.00255755	0.25	1	1	Not associated
GO Molecular Function	GO:0030332	cyclin binding	0.0447054	2.6178	1.91	5	0.00224706	0.00588235	0.0136106	4.10139	0.975279	4	15	0.00341006	0.266667	1	1	Not associated
MSigDB Pathway	KEGG_MELANOMA	Melanoma	0.0449469	1.64279	9.13082	15	0.0107421	0.0176471	0.0430977	1.92253	4.68134	9	72	0.00767263	0.125	1	1	Not associated
MSigDB Pathway	REACTOME_UNFOLDED_PROTEIN_RESPONSE	Genes involved in Unfolded Protein Response	0.0450529	2.17906	3.2124	7	0.00377929	0.00823529	0.233391	1.3982	5.00643	7	77	0.0059676	0.0909091	1	1	Not associated
MSigDB Pathway	PID_IGF1_PATHWAY	IGF1 pathway	0.0451143	2.05027	3.90192	8	0.00459049	0.00941177	0.00261473	3.58872	1.95056	7	30	0.0059676	0.233333	1	1	Not associated
MSigDB Pathway	KEGG_HOMOLOGOUS_RECOMBINATION	Homologous recombination	0.0453476	2.60714	1.91781	5	0.00225625	0.00588235	0.551557	1.09859	1.82052	2	28	0.00170503	0.0714286	1	1	Not associated
GO Molecular Function	GO:0046332	SMAD binding	0.0455683	1.63956	9.1488	15	0.0107633	0.0176471	0.00709936	2.4413	4.09617	10	63	0.00852515	0.15873	1	1	Not associated
MSigDB Pathway	REACTOME_FORMATION_OF_FIBRIN_CLOT_CLOTTING_CASCADE	Genes involved in Formation of Fibrin Clot (Clotting Cascade)	0.0461624	2.59387	1.92762	5	0.00226779	0.00588235	0.0601009	2.33034	2.14561	5	33	0.00426258	0.151515	1	1	Not associated
PANTHER Pathway	P00011	Blood coagulation	0.0462605	2.59228	1.9288	5	0.00226918	0.00588235	0.115672	1.92253	2.60074	5	40	0.00426258	0.125	1	1	Not associated
MSigDB Pathway	REACTOME_DNA_REPLICATION	Genes involved in DNA Replication	0.0472513	1.55364	11.5857	18	0.0136303	0.0211765	0.25458	1.21423	12.3535	15	190	0.0127877	0.0789474	1	1	Not associated
GO Cellular Component	GO:0030670	phagocytic vesicle membrane	0.0473336	2.32534	2.58027	6	0.00303561	0.00705882	0.211654	1.56941	3.18591	5	49	0.00426258	0.102041	1	1	Not associated
MSigDB Pathway	KEGG_GAP_JUNCTION	Gap junction	0.0482704	1.59743	10.0161	16	0.0117836	0.0188235	0.368923	1.19624	5.85167	7	90	0.0059676	0.0777778	1	1	Not associated
MSigDB Pathway	PID_THROMBIN_PAR1_PATHWAY	PAR1-mediated thrombin signaling events	0.0485176	2.01897	3.96243	8	0.00466168	0.00941177	0.0198822	2.50376	2.7958	7	43	0.0059676	0.162791	1	1	Not associated
GO Cellular Component	GO:0019013	viral nucleocapsid	0.0487188	2.30828	2.59934	6	0.00305805	0.00705882	0.0740192	2.19718	2.27565	5	35	0.00426258	0.142857	1	1	Not associated
GO Cellular Component	GO:0005924	cell-substrate adherens junction	0.0487543	1.56995	10.8284	17	0.0127393	0.02	0.262548	1.2532	8.77751	11	135	0.00937766	0.0814815	1	1	Not associated
GO Molecular Function	GO:0001786	phosphatidylserine binding	0.0487864	2.94906	1.35636	4	0.00159572	0.00470588	0.0693903	3.07604	0.975279	3	15	0.00255755	0.2	1	1	Not associated
GO Molecular Function	GO:0045125	bioactive lipid receptor activity	0.048833	3.70231	0.810306	3	0.000953301	0.00352941	0.0171214	5.12674	0.585167	3	9	0.00255755	0.333333	1	1	Not associated
GO Cellular Component	GO:0001725	stress fiber	0.048938	2.01526	3.96971	8	0.00467024	0.00941177	0.335463	1.36713	2.92584	4	45	0.00341006	0.0888889	1	1	Not associated
MSigDB Pathway	BIOCARTA_MTOR_PATHWAY	mTOR Signaling Pathway	0.0489921	2.94489	1.35828	4	0.00159798	0.00470588	0.446306	1.33741	1.49543	2	23	0.00170503	0.0869565	1	1	Not associated
GO Molecular Function	GO:0004703	G-protein coupled receptor kinase activity	0.0490178	5.68928	0.351538	2	0.000413575	0.00235294	0.0712839	4.39435	0.45513	2	7	0.00170503	0.285714	1	1	Not associated
MSigDB Pathway	BIOCARTA_GCR_PATHWAY	Corticosteroids and cardioprotection	0.0492625	2.30172	2.60674	6	0.00306675	0.00705882	0.122263	2.42846	1.23535	3	19	0.00255755	0.157895	1	1	Not associated
MSigDB Pathway	BIOCARTA_CARDIACEGF_PATHWAY	Role of EGF Receptor Transactivation by GPCRs in Cardiac Hypertrophy	0.0496649	2.29693	2.61218	6	0.00307316	0.00705882	0.0261297	3.41783	1.17033	4	18	0.00341006	0.222222	1	1	Not associated
MSigDB Pathway	REACTOME_OPIOID_SIGNALLING	Genes involved in Opioid Signalling	0.0497511	1.68763	7.70309	13	0.00906246	0.0152941	0.0615451	1.79769	5.00643	9	77	0.00767263	0.116883	1	1	Not associated
MSigDB Pathway	PID_SMAD2_3NUCLEARPATHWAY	Regulation of nuclear SMAD2/3 signaling	0.0502158	1.6167	9.27817	15	0.0109155	0.0176471	0.0154462	2.08867	5.2665	11	81	0.00937766	0.135802	1	1	Not associated
MSigDB Pathway	REACTOME_AMINO_ACID_SYNTHESIS_AND_INTERCONVERSION_TRANSAMINATION	Genes involved in Amino acid synthesis and interconversion (transamination)	0.0502814	2.91923	1.37023	4	0.00161203	0.00470588	0.279431	1.92253	1.0403	2	16	0.00170503	0.125	1	1	Not associated
MSigDB Pathway	REACTOME_DOWNSTREAM_SIGNALING_EVENTS_OF_B_CELL_RECEPTOR_BCR	Genes involved in Downstream Signaling Events Of B Cell Receptor (BCR)	0.0505897	1.77542	6.19572	11	0.00728908	0.0129412	0.157061	1.47257	6.11174	9	94	0.00767263	0.0957447	1	1	Not associated
GO Cellular Component	GO:0044430	cytoskeletal part	0.0506491	1.15844	102.724	119	0.120852	0.14	0.295562	1.0576	88.8804	94	1367	0.0801364	0.0687637	1	1	Not associated
GO Molecular Function	GO:0004030	aldehyde dehydrogenase [NAD(P)+] activity	0.0512474	5.54811	0.360483	2	0.000424098	0.00235294	0.0712839	4.39435	0.45513	2	7	0.00170503	0.285714	1	1	Not associated
GO Molecular Function	GO:0044548	S100 protein binding	0.0515177	5.53162	0.361558	2	0.000425362	0.00235294	0.416048	1.92253	0.520149	1	8	0.000852515	0.125	1	1	Not associated
MSigDB Pathway	REACTOME_SIGNALING_BY_THE_B_CELL_RECEPTOR_BCR	Genes involved in Signaling by the B Cell Receptor (BCR)	0.0518799	1.60902	9.32246	15	0.0109676	0.0176471	0.0566375	1.62555	7.99728	13	123	0.0110827	0.105691	1	1	Not associated
GO Cellular Component	GO:0032432	actin filament bundle	0.0521372	1.98816	4.02383	8	0.00473391	0.00941177	0.365626	1.30896	3.05587	4	47	0.00341006	0.0851064	1	1	Not associated
GO Cellular Component	GO:0044437	vacuolar part	0.052442	1.37675	21.7905	30	0.0256359	0.0352941	0.253356	1.15241	22.5614	26	347	0.0221654	0.0749279	1	1	Not associated
GO Cellular Component	GO:0030126	COPI vesicle coat	0.0524677	3.59372	0.834789	3	0.000982104	0.00352941	0.0480085	3.54928	0.845241	3	13	0.00255755	0.230769	1	1	Not associated
MSigDB Pathway	REACTOME_KINESINS	Genes involved in Kinesins	0.0525686	2.49822	2.00142	5	0.00235461	0.00588235	0.490109	1.23042	1.62546	2	25	0.00170503	0.08	1	1	Not associated
MSigDB Pathway	BIOCARTA_BARRESTIN_PATHWAY	fl-arrestins in GPCR Desensitization	0.0525844	3.5904	0.835561	3	0.000983013	0.00352941	0.023294	4.61407	0.650186	3	10	0.00255755	0.3	1	1	Not associated
MSigDB Pathway	REACTOME_TRAF6_MEDIATED_INDUCTION_OF_NFKB_AND_MAP_KINASES_UPON_TLR7_8_OR_9_ACTIVATION	Genes involved in TRAF6 mediated induction of NFkB and MAP kinases upon TLR7/8 or 9 activation	0.0526717	1.71392	7.00151	12	0.00823707	0.0141177	0.0249122	2.02371	4.94141	10	76	0.00852515	0.131579	1	1	Not associated
GO Cellular Component	GO:0072546	ER membrane protein complex	0.0528579	5.45172	0.366856	2	0.000431596	0.00235294	0.134391	3.07604	0.650186	2	10	0.00170503	0.2	1	1	Not associated
GO Molecular Function	GO:0051427	hormone receptor binding	0.0530544	1.53028	11.7626	18	0.0138383	0.0211765	0.255416	1.24704	9.62275	12	148	0.0102302	0.0810811	1	1	Not associated
GO Cellular Component	GO:0045178	basal part of cell	0.0531309	2.25736	2.65798	6	0.00312703	0.00705882	0.20409	1.70891	2.34067	4	36	0.00341006	0.111111	1	1	Not associated
MSigDB Pathway	KEGG_NATURAL_KILLER_CELL_MEDIATED_CYTOTOXICITY	Natural killer cell mediated cytotoxicity	0.0531664	1.66989	7.78497	13	0.00915878	0.0152941	0.355606	1.16517	8.58245	10	132	0.00852515	0.0757576	1	1	Not associated
GO Molecular Function	GO:0008020	G-protein coupled photoreceptor activity	0.0531803	5.43296	0.368124	2	0.000433087	0.00235294	0.375423	2.19718	0.45513	1	7	0.000852515	0.142857	1	1	Not associated
GO Molecular Function	GO:0030250	guanylate cyclase activator activity	0.0532198	5.43067	0.368279	2	0.000433269	0.00235294	0.0531656	5.12674	0.390111	2	6	0.00170503	0.333333	1	1	Not associated
GO Cellular Component	GO:0044453	nuclear membrane part	0.0533805	5.42139	0.368909	2	0.000434011	0.00235294	0.331975	2.56337	0.390111	1	6	0.000852515	0.166667	1	1	Not associated
GO Cellular Component	GO:0019028	viral capsid	0.0534649	2.2537	2.66229	6	0.00313211	0.00705882	0.0895341	2.07841	2.40569	5	37	0.00426258	0.135135	1	1	Not associated
GO Cellular Component	GO:0045121	membrane raft	0.0536628	1.39102	20.1291	28	0.0236813	0.0329412	0.00961511	1.73648	12.0935	21	186	0.0179028	0.112903	1	1	Not associated
GO Molecular Function	GO:0002020	protease binding	0.0538918	1.97404	4.0526	8	0.00476777	0.00941177	0.377372	1.24034	4.03115	5	62	0.00426258	0.0806452	1	1	Not associated
MSigDB Pathway	BIOCARTA_PLCE_PATHWAY	Phospholipase C-epsilon pathway	0.0542386	2.84523	1.40586	4	0.00165395	0.00470588	0.18122	2.56337	0.780223	2	12	0.00170503	0.166667	1	1	Not associated
MSigDB Pathway	REACTOME_SIGNALING_BY_INSULIN_RECEPTOR	Genes involved in Signaling by Insulin receptor	0.0545094	1.62804	8.59931	14	0.0101168	0.0164706	0.151031	1.45096	6.89197	10	106	0.00852515	0.0943396	1	1	Not associated
GO Molecular Function	GO:0070513	death domain binding	0.0547095	3.53158	0.849479	3	0.000999387	0.00352941	0.0910495	3.84505	0.520149	2	8	0.00170503	0.25	1	1	Not associated
GO Molecular Function	GO:0016274	protein-arginine N-methyltransferase activity	0.0548456	3.52791	0.850361	3	0.00100043	0.00352941	0.454033	1.70891	0.585167	1	9	0.000852515	0.111111	1	1	Not associated
GO Cellular Component	GO:0005815	microtubule organizing center	0.0549351	1.2702	38.5767	49	0.0453844	0.0576471	0.199931	1.1513	33.8747	39	521	0.0332481	0.074856	1	1	Not associated
MSigDB Pathway	BIOCARTA_TNFR2_PATHWAY	TNFR2 Signaling Pathway	0.0549981	2.83179	1.41254	4	0.00166181	0.00470588	0.304116	1.80944	1.10532	2	17	0.00170503	0.117647	1	1	Not associated
GO Cellular Component	GO:0030663	COPI-coated vesicle membrane	0.0551191	3.52059	0.852131	3	0.00100251	0.00352941	0.0582344	3.29576	0.91026	3	14	0.00255755	0.214286	1	1	Not associated
MSigDB Pathway	REACTOME_SMAD2_SMAD3_SMAD4_HETEROTRIMER_REGULATES_TRANSCRIPTION	Genes involved in SMAD2/SMAD3:SMAD4 heterotrimer regulates transcription	0.0553355	2.46104	2.03166	5	0.00239019	0.00588235	0.0756099	2.46083	1.62546	4	25	0.00341006	0.16	1	1	Not associated
GO Molecular Function	GO:0030249	guanylate cyclase regulator activity	0.0556054	5.29702	0.37757	2	0.000444201	0.00235294	0.0712839	4.39435	0.45513	2	7	0.00170503	0.285714	1	1	Not associated
GO Cellular Component	GO:0030173	integral to Golgi membrane	0.0561811	1.86901	4.81539	9	0.00566516	0.0105882	0.0527506	2.19718	2.73078	6	42	0.00511509	0.142857	1	1	Not associated
GO Molecular Function	GO:0031625	ubiquitin protein ligase binding	0.0561894	1.46629	14.3218	21	0.0168492	0.0247059	0.0296792	1.64443	10.3379	17	159	0.0144928	0.106918	1	1	Not associated
MSigDB Pathway	KEGG_GNRH_SIGNALING_PATHWAY	GnRH signaling pathway	0.0563199	1.61986	8.64274	14	0.0101679	0.0164706	0.0599039	1.69182	6.50186	11	100	0.00937766	0.11	1	1	Not associated
GO Cellular Component	GO:0031526	brush border membrane	0.0564815	2.22177	2.70055	6	0.00317711	0.00705882	0.10659	1.97182	2.53572	5	39	0.00426258	0.128205	1	1	Not associated
PANTHER Pathway	P02738	De novo purine biosynthesis	0.0566948	2.80255	1.42727	4	0.00167914	0.00470588	0.273069	1.64788	1.82052	3	28	0.00255755	0.107143	1	1	Not associated
MSigDB Pathway	ST_WNT_CA2_CYCLIC_GMP_PATHWAY	Wnt/Ca2+/cyclic GMP signaling.	0.0567288	2.80198	1.42756	4	0.00167949	0.00470588	0.13725	2.30703	1.30037	3	20	0.00255755	0.15	1	1	Not associated
MSigDB Pathway	PID_HDAC_CLASSI_PATHWAY	Signaling events mediated by HDAC Class I	0.0567289	1.95222	4.09789	8	0.00482105	0.00941177	0.403657	1.20158	4.16119	5	64	0.00426258	0.078125	1	1	Not associated
MSigDB Pathway	KEGG_HEMATOPOIETIC_CELL_LINEAGE	Hematopoietic cell lineage	0.056919	1.79509	5.57074	10	0.00655382	0.0117647	0.19539	1.43072	5.5916	8	86	0.00682012	0.0930233	1	1	Not associated
GO Molecular Function	GO:0003697	single-stranded DNA binding	0.056966	1.95045	4.10161	8	0.00482542	0.00941177	0.246485	1.41971	4.22621	6	65	0.00511509	0.0923077	1	1	Not associated
MSigDB Pathway	KEGG_DRUG_METABOLISM_CYTOCHROME_P450	Drug metabolism - cytochrome P450	0.057202	2.21443	2.7095	6	0.00318765	0.00705882	0.32622	1.28168	4.68134	6	72	0.00511509	0.0833333	1	1	Not associated
GO Cellular Component	GO:0042641	actomyosin	0.0572361	1.862	4.83352	9	0.0056865	0.0105882	0.285992	1.3982	3.57602	5	55	0.00426258	0.0909091	1	1	Not associated
GO Molecular Function	GO:0003723	RNA binding	0.0574034	1.20703	60.4791	73	0.0711519	0.0858823	0.308109	1.06831	58.9718	63	907	0.0537084	0.0694598	1	1	Not associated
MSigDB Pathway	REACTOME_RESPONSE_TO_ELEVATED_PLATELET_CYTOSOLIC_CA2_	Genes involved in Response to elevated platelet cytosolic Ca2+	0.0574633	1.73575	6.33733	11	0.00745568	0.0129412	0.147861	1.53802	5.20149	8	80	0.00682012	0.1	1	1	Not associated
GO Molecular Function	GO:0005126	cytokine receptor binding	0.0576106	1.46183	14.3656	21	0.0169007	0.0247059	0.181925	1.26413	14.2391	18	219	0.0153453	0.0821918	1	1	Not associated
GO Cellular Component	GO:0044431	Golgi apparatus part	0.0584923	1.20745	59.6297	72	0.0701526	0.0847059	0.0117366	1.34834	43.7575	59	673	0.0502984	0.0876672	1	1	Not associated
MSigDB Pathway	REACTOME_INTRINSIC_PATHWAY_FOR_APOPTOSIS	Genes involved in Intrinsic Pathway for Apoptosis	0.0591409	2.4133	2.07185	5	0.00243747	0.00588235	0.116167	2.12141	1.88554	4	29	0.00341006	0.137931	1	1	Not associated
GO Molecular Function	GO:0051059	NF-kappaB binding	0.0593035	2.75964	1.44947	4	0.00170525	0.00470588	0.219712	1.84563	1.62546	3	25	0.00255755	0.12	1	1	Not associated
GO Cellular Component	GO:0031988	membrane-bounded vesicle	0.0598849	1.17518	79.1367	93	0.093102	0.109412	0.270204	1.07849	63.9783	69	984	0.0588235	0.070122	1	1	Not associated
GO Molecular Function	GO:0008170	N-methyltransferase activity	0.0599987	1.77718	5.6269	10	0.00661988	0.0117647	0.16019	1.56031	4.48628	7	69	0.0059676	0.101449	1	1	Not associated
GO Molecular Function	GO:0016505	peptidase activator activity involved in apoptotic process	0.0605183	2.74043	1.45962	4	0.00171721	0.00470588	0.152822	2.19718	1.36539	3	21	0.00255755	0.142857	1	1	Not associated
GO Molecular Function	GO:0016829	lyase activity	0.0614414	1.50055	11.9956	18	0.0141125	0.0211765	0.158488	1.34577	10.403	14	160	0.0119352	0.0875	1	1	Not associated
MSigDB Pathway	REACTOME_ACTIVATED_TLR4_SIGNALLING	Genes involved in Activated TLR4 signalling	0.0622288	1.62782	7.98615	13	0.00939547	0.0152941	0.0360861	1.83894	5.98171	11	92	0.00937766	0.119565	1	1	Not associated
GO Cellular Component	GO:0031974	membrane-enclosed lumen	0.0624648	1.10076	191.685	211	0.225512	0.248235	0.515036	0.999714	182.052	182	2800	0.155158	0.065	1	1	Not associated
MSigDB Pathway	BIOCARTA_LYM_PATHWAY	Adhesion and Diapedesis of Lymphocytes	0.0629487	3.32912	0.90114	3	0.00106017	0.00352941	0.489548	1.53802	0.650186	1	10	0.000852515	0.1	1	1	Not associated
MSigDB Pathway	REACTOME_ACTIVATION_OF_NF_KAPPAB_IN_B_CELLS	Genes involved in Activation of NF-kappaB in B Cells	0.0632415	2.01243	3.47838	7	0.00409221	0.00823529	0.224796	1.46478	4.09617	6	63	0.00511509	0.0952381	1	1	Not associated
GO Molecular Function	GO:0005031	tumor necrosis factor-activated receptor activity	0.0634296	3.31839	0.904054	3	0.00106359	0.00352941	0.030509	4.19461	0.715204	3	11	0.00255755	0.272727	1	1	Not associated
MSigDB Pathway	REACTOME_PKB_MEDIATED_EVENTS	Genes involved in PKB-mediated events	0.0641375	2.68589	1.48926	4	0.00175207	0.00470588	0.273069	1.64788	1.82052	3	28	0.00255755	0.107143	1	1	Not associated
GO Molecular Function	GO:0047485	protein N-terminus binding	0.0641995	1.65709	7.24162	12	0.00851955	0.0141177	0.136616	1.52112	5.91669	9	91	0.00767263	0.0989011	1	1	Not associated
MSigDB Pathway	REACTOME_SIGNALING_BY_PDGF	Genes involved in Signaling by PDGF	0.0642322	1.51144	11.2476	17	0.0132325	0.02	0.0455035	1.68019	7.73721	13	119	0.0110827	0.109244	1	1	Not associated
GO Cellular Component	GO:0022624	proteasome accessory complex	0.0643847	3.29739	0.90981	3	0.00107036	0.00352941	0.185468	2.00612	1.49543	3	23	0.00255755	0.130435	1	1	Not associated
MSigDB Pathway	ST_GA12_PATHWAY	G alpha 12 Pathway	0.0644554	2.68128	1.49182	4	0.00175509	0.00470588	0.185468	2.00612	1.49543	3	23	0.00255755	0.130435	1	1	Not associated
GO Molecular Function	GO:0097367	carbohydrate derivative binding	0.0644633	1.10797	169.68	188	0.199624	0.221176	0.188676	1.07137	139.075	149	2139	0.127025	0.0696587	1	1	Not associated
MSigDB Pathway	REACTOME_IL1_SIGNALING	Genes involved in Interleukin-1 signaling	0.0644959	2.00294	3.49486	7	0.0041116	0.00823529	0.115672	1.92253	2.60074	5	40	0.00426258	0.125	1	1	Not associated
MSigDB Pathway	REACTOME_RNA_POL_III_TRANSCRIPTION_INITIATION_FROM_TYPE_2_PROMOTER	Genes involved in RNA Polymerase III Transcription Initiation From Type 2 Promoter	0.064844	3.28744	0.912565	3	0.00107361	0.00352941	0.185468	2.00612	1.49543	3	23	0.00255755	0.130435	1	1	Not associated
GO Molecular Function	GO:0003678	DNA helicase activity	0.0653737	2.13778	2.80665	6	0.00330194	0.00705882	0.177129	1.67176	2.99085	5	46	0.00426258	0.108696	1	1	Not associated
GO Molecular Function	GO:0042979	ornithine decarboxylase regulator activity	0.0657932	4.81023	0.41578	2	0.000489153	0.00235294	0.0531656	5.12674	0.390111	2	6	0.00170503	0.333333	1	1	Not associated
GO Cellular Component	GO:0001917	photoreceptor inner segment	0.0662481	2.33303	2.14314	5	0.00252133	0.00588235	0.0756099	2.46083	1.62546	4	25	0.00341006	0.16	1	1	Not associated
MSigDB Pathway	PID_KITPATHWAY	Signaling events mediated by Stem cell factor receptor (c-Kit)	0.0664719	1.74243	5.7391	10	0.00675188	0.0117647	0.0182706	2.36619	3.38097	8	52	0.00682012	0.153846	1	1	Not associated
GO Cellular Component	GO:0000139	Golgi membrane	0.0666642	1.22163	49.1148	60	0.0577821	0.0705882	0.016036	1.36775	35.8252	49	551	0.0417732	0.0889292	1	1	Not associated
GO Molecular Function	GO:0003779	actin binding	0.0671829	1.27647	32.9032	42	0.0387096	0.0494118	0.0493785	1.35583	23.6017	32	363	0.0272805	0.0881543	1	1	Not associated
MSigDB Pathway	PID_ANGIOPOIETINRECEPTOR_PATHWAY	Angiopoietin receptor Tie2-mediated signaling	0.0675005	1.80009	4.99976	9	0.00588207	0.0105882	0.0417522	2.15323	3.25093	7	50	0.0059676	0.14	1	1	Not associated
GO Molecular Function	GO:0050780	dopamine receptor binding	0.0677055	4.73127	0.422719	2	0.000497317	0.00235294	0.416048	1.92253	0.520149	1	8	0.000852515	0.125	1	1	Not associated
MSigDB Pathway	PID_MTOR_4PATHWAY	mTOR signaling pathway	0.0677376	1.79878	5.0034	9	0.00588636	0.0105882	0.151867	1.58326	4.42126	7	68	0.0059676	0.102941	1	1	Not associated
MSigDB Pathway	REACTOME_TRANSLATION	Genes involved in Translation	0.0677565	1.68458	6.5298	11	0.00768212	0.0129412	0.747126	0.837019	9.55773	8	147	0.00682012	0.0544218	1	1	Not associated
MSigDB Pathway	BIOCARTA_SODD_PATHWAY	SODD/TNFR1 Signaling Pathway	0.0678004	4.72744	0.423062	2	0.00049772	0.00235294	0.489548	1.53802	0.650186	1	10	0.000852515	0.1	1	1	Not associated
MSigDB Pathway	REACTOME_IL_2_SIGNALING	Genes involved in Interleukin-2 signaling	0.067816	2.11694	2.83428	6	0.00333444	0.00705882	0.290488	1.46478	2.73078	4	42	0.00341006	0.0952381	1	1	Not associated
GO Molecular Function	GO:0016772	transferase activity, transferring phosphorus-containing groups	0.06808	1.16496	81.5479	95	0.0959387	0.111765	0.0517954	1.20381	63.133	76	971	0.0647911	0.0782698	1	1	Not associated
GO Molecular Function	GO:0043560	insulin receptor substrate binding	0.0681317	2.62991	1.52097	4	0.00178937	0.00470588	0.0480085	3.54928	0.845241	3	13	0.00255755	0.230769	1	1	Not associated
MSigDB Pathway	PID_MYC_REPRESSPATHWAY	Validated targets of C-MYC transcriptional repression	0.068248	1.68234	6.5385	11	0.00769235	0.0129412	0.0505742	1.95304	4.09617	8	63	0.00682012	0.126984	1	1	Not associated
MSigDB Pathway	BIOCARTA_BARR_MAPK_PATHWAY	Role of fl-arrestins in the activation and targeting of MAP kinases	0.0682958	3.2155	0.932981	3	0.00109763	0.00352941	0.0387552	3.84505	0.780223	3	12	0.00255755	0.25	1	1	Not associated
MSigDB Pathway	REACTOME_SHC1_EVENTS_IN_EGFR_SIGNALING	Genes involved in SHC1 events in EGFR signaling	0.0684826	3.21174	0.934072	3	0.00109891	0.00352941	0.25468	2.0507	0.975279	2	15	0.00170503	0.133333	1	1	Not associated
MSigDB Pathway	REACTOME_REGULATION_OF_ORNITHINE_DECARBOXYLASE_ODC	Genes involved in Regulation of ornithine decarboxylase (ODC)	0.0685681	2.30898	2.16546	5	0.0025476	0.00588235	0.223613	1.53802	3.25093	5	50	0.00426258	0.1	1	1	Not associated
MSigDB Pathway	PID_S1P_S1P4_PATHWAY	S1P4 pathway	0.0688299	3.20479	0.936098	3	0.00110129	0.00352941	0.229975	2.19718	0.91026	2	14	0.00170503	0.142857	1	1	Not associated
MSigDB Pathway	REACTOME_PRESYNAPTIC_NICOTINIC_ACETYLCHOLINE_RECEPTORS	Genes involved in Presynaptic nicotinic acetylcholine receptors	0.0688757	4.68458	0.426933	2	0.000502274	0.00235294	0.18122	2.56337	0.780223	2	12	0.00170503	0.166667	1	1	Not associated
MSigDB Pathway	REACTOME_G_ALPHA_Z_SIGNALLING_EVENTS	Genes involved in G alpha (z) signalling events	0.0692366	1.86822	4.28216	8	0.00503783	0.00941177	0.0637209	2.0973	2.86082	6	44	0.00511509	0.136364	1	1	Not associated
MSigDB Pathway	PID_TXA2PATHWAY	Thromboxane A2 receptor signaling	0.0698299	1.86465	4.29036	8	0.00504748	0.00941177	0.164099	1.61897	3.70606	6	57	0.00511509	0.105263	1	1	Not associated
GO Molecular Function	GO:0015370	solute:sodium symporter activity	0.0699321	1.96402	3.56412	7	0.00419308	0.00823529	0.211654	1.56941	3.18591	5	49	0.00426258	0.102041	1	1	Not associated
GO Cellular Component	GO:0043190	ATP-binding cassette (ABC) transporter complex	0.0703053	13.7182	0.0728959	1	8.57599e-05	0.00117647	0.331975	2.56337	0.390111	1	6	0.000852515	0.166667	1	1	Not associated
GO Molecular Function	GO:0046933	proton-transporting ATP synthase activity, rotational mechanism	0.0704025	4.6254	0.432395	2	0.0005087	0.00235294	0.157476	2.7964	0.715204	2	11	0.00170503	0.181818	1	1	Not associated
MSigDB Pathway	REACTOME_SIGNALING_BY_CONSTITUTIVELY_ACTIVE_EGFR	Genes involved in Signaling by constitutively active EGFR	0.0710404	2.5916	1.54345	4	0.00181582	0.00470588	0.0942905	2.71416	1.10532	3	17	0.00255755	0.176471	1	1	Not associated
MSigDB Pathway	ST_PAC1_RECEPTOR_PATHWAY	PAC1 Receptor Pathway	0.0717167	4.57597	0.437066	2	0.000514195	0.00235294	0.375423	2.19718	0.45513	1	7	0.000852515	0.142857	1	1	Not associated
MSigDB Pathway	BIOCARTA_GSK3_PATHWAY	Inactivation of Gsk3 by AKT causes accumulation of b-catenin in Alveolar Macrophages	0.0721886	1.94882	3.59192	7	0.00422579	0.00823529	0.25509	1.70891	1.7555	3	27	0.00255755	0.111111	1	1	Not associated
MSigDB Pathway	REACTOME_CELL_CYCLE_CHECKPOINTS	Genes involved in Cell Cycle Checkpoints	0.0725856	1.71268	5.83881	10	0.00686919	0.0117647	0.313754	1.22497	7.3471	9	113	0.00767263	0.079646	1	1	Not associated
MSigDB Pathway	BIOCARTA_EPO_PATHWAY	EPO Signaling Pathway	0.0729087	3.12649	0.959544	3	0.00112888	0.00352941	0.122263	2.42846	1.23535	3	19	0.00255755	0.157895	1	1	Not associated
MSigDB Pathway	BIOCARTA_CDMAC_PATHWAY	Cadmium induces DNA synthesis and proliferation in macrophages	0.0733972	2.56193	1.56132	4	0.00183685	0.00470588	0.0814271	2.88379	1.0403	3	16	0.00255755	0.1875	1	1	Not associated
GO Molecular Function	GO:0019894	kinesin binding	0.0733978	2.56192	1.56133	4	0.00183686	0.00470588	0.168915	2.0973	1.43041	3	22	0.00255755	0.136364	1	1	Not associated
GO Molecular Function	GO:0015929	hexosaminidase activity	0.0734731	4.51198	0.443264	2	0.000521487	0.00235294	0.609978	1.09859	0.91026	1	14	0.000852515	0.0714286	1	1	Not associated
MSigDB Pathway	PID_LPA4_PATHWAY	LPA4-mediated signaling events	0.0735848	2.26003	2.21236	5	0.00260277	0.00588235	0.0693903	3.07604	0.975279	3	15	0.00255755	0.2	1	1	Not associated
MSigDB Pathway	PID_ECADHERIN_STABILIZATION_PATHWAY	Stabilization and expansion of the E-cadherin adherens junction	0.0736437	1.84242	4.34212	8	0.00510838	0.00941177	0.134886	1.83098	2.73078	5	42	0.00426258	0.119048	1	1	Not associated
MSigDB Pathway	BIOCARTA_CSK_PATHWAY	Activation of Csk by cAMP-dependent Protein Kinase Inhibits Signaling through the T Cell Receptor	0.0742894	2.551	1.56801	4	0.00184472	0.00470588	0.423624	1.3982	1.43041	2	22	0.00170503	0.0909091	1	1	Not associated
GO Molecular Function	GO:0008187	poly-pyrimidine tract binding	0.0743374	2.55042	1.56837	4	0.00184514	0.00470588	0.489548	1.53802	0.650186	1	10	0.000852515	0.1	1	1	Not associated
GO Molecular Function	GO:0005035	death receptor activity	0.0746872	3.09412	0.969581	3	0.00114068	0.00352941	0.0480085	3.54928	0.845241	3	13	0.00255755	0.230769	1	1	Not associated
GO Cellular Component	GO:0031228	intrinsic to Golgi membrane	0.0747043	1.76225	5.1071	9	0.00600835	0.0105882	0.0696716	2.0507	2.92584	6	45	0.00511509	0.133333	1	1	Not associated
MSigDB Pathway	PID_HIF1_TFPATHWAY	HIF-1-alpha transcription factor network	0.0747881	1.65398	6.65061	11	0.00782424	0.0129412	0.0263826	2.0973	4.29123	9	66	0.00767263	0.136364	1	1	Not associated
MSigDB Pathway	KEGG_CYSTEINE_AND_METHIONINE_METABOLISM	Cysteine and methionine metabolism	0.0751255	2.24578	2.2264	5	0.0026193	0.00588235	0.38201	1.35708	2.21063	3	34	0.00255755	0.0882353	1	1	Not associated
MSigDB Pathway	REACTOME_CDT1_ASSOCIATION_WITH_THE_CDC6_ORC_ORIGIN_COMPLEX	Genes involved in CDT1 association with the CDC6:ORC:origin complex	0.0751564	2.24549	2.22668	5	0.00261963	0.00588235	0.29886	1.37323	3.64104	5	56	0.00426258	0.0892857	1	1	Not associated
MSigDB Pathway	PID_TCPTP_PATHWAY	Signaling events mediated by TCPTP	0.0753376	1.83293	4.36459	8	0.00513481	0.00941177	0.155412	1.74775	2.86082	5	44	0.00426258	0.113636	1	1	Not associated
GO Molecular Function	GO:0015450	P-P-bond-hydrolysis-driven protein transmembrane transporter activity	0.0756104	4.43713	0.450742	2	0.000530285	0.00235294	0.375423	2.19718	0.45513	1	7	0.000852515	0.142857	1	1	Not associated
MSigDB Pathway	PID_PI3KPLCTRKPATHWAY	Trk receptor signaling mediated by PI3K and PLC-gamma	0.0758579	2.05383	2.92138	6	0.00343691	0.00705882	0.0895341	2.07841	2.40569	5	37	0.00426258	0.135135	1	1	Not associated
GO Molecular Function	GO:0004707	MAP kinase activity	0.0760026	3.07083	0.976936	3	0.00114934	0.00352941	0.0582344	3.29576	0.91026	3	14	0.00255755	0.214286	1	1	Not associated
MSigDB Pathway	PID_IL6_7PATHWAY	IL6-mediated signaling events	0.0761746	1.755	5.12821	9	0.00603319	0.0105882	0.0825004	1.96343	3.05587	6	47	0.00511509	0.12766	1	1	Not associated
GO Cellular Component	GO:0031981	nuclear lumen	0.0769917	1.11032	148.606	165	0.174831	0.194118	0.379987	1.02683	135.369	139	2082	0.1185	0.0667627	1	1	Not associated
GO Molecular Function	GO:0008757	S-adenosylmethionine-dependent methyltransferase activity	0.0770365	1.60479	7.4776	12	0.00879718	0.0141177	0.260213	1.29366	6.95699	9	107	0.00767263	0.0841121	1	1	Not associated
GO Molecular Function	GO:0003707	steroid hormone receptor activity	0.0770911	1.57052	8.27754	13	0.00973828	0.0152941	9.80492e-05	3.54928	3.38097	12	52	0.0102302	0.230769	1	0.169135	Not associated
GO Cellular Component	GO:0044423	virion part	0.0771278	2.04455	2.93464	6	0.00345251	0.00705882	0.144993	1.7884	2.7958	5	43	0.00426258	0.116279	1	1	Not associated
MSigDB Pathway	KEGG_GLYCEROPHOSPHOLIPID_METABOLISM	Glycerophospholipid metabolism	0.0772073	1.69184	5.91073	10	0.0069538	0.0117647	0.223671	1.4166	4.94141	7	76	0.0059676	0.0921053	1	1	Not associated
GO Cellular Component	GO:0045335	phagocytic vesicle	0.0772759	1.91636	3.65276	7	0.00429736	0.00823529	0.257548	1.3982	4.29123	6	66	0.00511509	0.0909091	1	1	Not associated
MSigDB Pathway	KEGG_CHEMOKINE_SIGNALING_PATHWAY	Chemokine signaling pathway	0.0773805	1.43708	13.2212	19	0.0155544	0.0223529	0.174062	1.29518	12.3535	16	190	0.0136402	0.0842105	1	1	Not associated
GO Cellular Component	GO:0008021	synaptic vesicle	0.0774696	1.47134	11.5541	17	0.0135931	0.02	0.234608	1.33098	6.76193	9	104	0.00767263	0.0865385	1	1	Not associated
MSigDB Pathway	BIOCARTA_ARENRF2_PATHWAY	Oxidative Stress Induced Gene Expression Via Nrf2	0.0780748	3.03518	0.98841	3	0.00116284	0.00352941	0.0480085	3.54928	0.845241	3	13	0.00255755	0.230769	1	1	Not associated
GO Molecular Function	GO:0019206	nucleoside kinase activity	0.0787038	3.0246	0.991865	3	0.0011669	0.00352941	0.030509	4.19461	0.715204	3	11	0.00255755	0.272727	1	1	Not associated
GO Cellular Component	GO:0034464	BBSome	0.0788227	3.02262	0.992518	3	0.00116767	0.00352941	0.454033	1.70891	0.585167	1	9	0.000852515	0.111111	1	1	Not associated
MSigDB Pathway	SA_G2_AND_M_PHASES	Cdc25 activates the cdc2/cyclin B complex to induce the G2/M transition.	0.0788649	4.329	0.462	2	0.00054353	0.00235294	0.416048	1.92253	0.520149	1	8	0.000852515	0.125	1	1	Not associated
MSigDB Pathway	REACTOME_ACTIVATION_OF_THE_MRNA_UPON_BINDING_OF_THE_CAP_BINDING_COMPLEX_AND_EIFS_AND_SUBSEQUENT_BINDING_TO_43S	Genes involved in Activation of the mRNA upon binding of the cap-binding complex and eIFs, and subsequent binding to 43S	0.0789072	2.03182	2.95301	6	0.00347413	0.00705882	0.512282	1.07931	3.70606	4	57	0.00341006	0.0701754	1	1	Not associated
GO Molecular Function	GO:0008035	high-density lipoprotein particle binding	0.0793896	4.31219	0.463802	2	0.000545649	0.00235294	0.375423	2.19718	0.45513	1	7	0.000852515	0.142857	1	1	Not associated
GO Molecular Function	GO:0016922	ligand-dependent nuclear receptor binding	0.0794406	2.02807	2.95848	6	0.00348056	0.00705882	0.152822	2.19718	1.36539	3	21	0.00255755	0.142857	1	1	Not associated
GO Cellular Component	GO:0032059	bleb	0.0795351	4.30755	0.464301	2	0.000546236	0.00235294	0.375423	2.19718	0.45513	1	7	0.000852515	0.142857	1	1	Not associated
MSigDB Pathway	PID_S1P_S1P2_PATHWAY	S1P2 pathway	0.0795728	2.20644	2.26609	5	0.00266599	0.00588235	0.0668032	2.56337	1.56045	4	24	0.00341006	0.166667	1	1	Not associated
GO Molecular Function	GO:0019534	toxin transporter activity	0.0799041	4.29587	0.465564	2	0.000547722	0.00235294	0.0910495	3.84505	0.520149	2	8	0.00170503	0.25	1	1	Not associated
MSigDB Pathway	REACTOME_REGULATION_OF_MITOTIC_CELL_CYCLE	Genes involved in Regulation of mitotic cell cycle	0.0802324	1.80674	4.42785	8	0.00520924	0.00941177	0.140546	1.55749	5.13647	8	79	0.00682012	0.101266	1	1	Not associated
MSigDB Pathway	BIOCARTA_CXCR4_PATHWAY	CXCR4 Signaling Pathway	0.0802976	2.0221	2.96721	6	0.00349083	0.00705882	0.0173598	3.20421	1.56045	5	24	0.00426258	0.208333	1	1	Not associated
MSigDB Pathway	REACTOME_PLATELET_ADHESION_TO_EXPOSED_COLLAGEN	Genes involved in Platelet Adhesion to exposed collagen	0.0811968	2.98375	1.00544	3	0.00118288	0.00352941	0.0480085	3.54928	0.845241	3	13	0.00255755	0.230769	1	1	Not associated
GO Molecular Function	GO:1901505	carbohydrate derivative transporter activity	0.0812719	2.47063	1.61902	4	0.00190473	0.00470588	0.25509	1.70891	1.7555	3	27	0.00255755	0.111111	1	1	Not associated
MSigDB Pathway	REACTOME_GLUCONEOGENESIS	Genes involved in Gluconeogenesis	0.0814072	2.46916	1.61998	4	0.00190586	0.00470588	0.607588	0.992272	2.01558	2	31	0.00170503	0.0645161	1	1	Not associated
GO Molecular Function	GO:0001965	G-protein alpha-subunit binding	0.0814308	2.4689	1.62015	4	0.00190606	0.00470588	0.030509	4.19461	0.715204	3	11	0.00255755	0.272727	1	1	Not associated
GO Cellular Component	GO:0080008	Cul4-RING ubiquitin ligase complex	0.0820401	2.97031	1.01	3	0.00118823	0.00352941	0.152822	2.19718	1.36539	3	21	0.00255755	0.142857	1	1	Not associated
GO Molecular Function	GO:0046625	sphingolipid binding	0.0822548	2.96691	1.01115	3	0.00118959	0.00352941	0.0480085	3.54928	0.845241	3	13	0.00255755	0.230769	1	1	Not associated
MSigDB Pathway	BIOCARTA_VIP_PATHWAY	Neuropeptides VIP and PACAP inhibit the apoptosis of activated T cells	0.0826981	2.00575	2.9914	6	0.00351929	0.00705882	0.237287	1.77464	1.69048	3	26	0.00255755	0.115385	1	1	Not associated
GO Molecular Function	GO:0004003	ATP-dependent DNA helicase activity	0.083443	2.17422	2.29967	5	0.0027055	0.00588235	0.177168	1.80944	2.21063	4	34	0.00341006	0.117647	1	1	Not associated
GO Molecular Function	GO:0017124	SH3 domain binding	0.0834911	1.45523	11.682	17	0.0137436	0.02	0.0170857	1.87237	7.47713	14	115	0.0119352	0.121739	1	1	Not associated
GO Molecular Function	GO:0016308	1-phosphatidylinositol-4-phosphate 5-kinase activity	0.0834973	4.18606	0.477776	2	0.000562089	0.00235294	0.0712839	4.39435	0.45513	2	7	0.00170503	0.285714	1	1	Not associated
MSigDB Pathway	PID_AMB2_NEUTROPHILS_PATHWAY	amb2 Integrin signaling	0.0835179	2.17362	2.30031	5	0.00270625	0.00588235	0.275669	1.50051	2.66576	4	41	0.00341006	0.097561	1	1	Not associated
MSigDB Pathway	PID_SYNDECAN_4_PATHWAY	Syndecan-4-mediated signaling events	0.0837025	1.87851	3.72635	7	0.00438394	0.00823529	0.00385883	3.36442	2.08059	7	32	0.0059676	0.21875	1	1	Not associated
MSigDB Pathway	PID_INTEGRIN2_PATHWAY	Beta2 integrin cell surface interactions	0.0839885	2.93991	1.02044	3	0.00120052	0.00352941	0.291173	1.59106	1.88554	3	29	0.00255755	0.103448	1	1	Not associated
MSigDB Pathway	REACTOME_SIGNALING_BY_WNT	Genes involved in Signaling by Wnt	0.0841178	1.87618	3.73099	7	0.0043894	0.00823529	0.246485	1.41971	4.22621	6	65	0.00511509	0.0923077	1	1	Not associated
PANTHER Pathway	P00060	Ubiquitin proteasome pathway	0.0842361	1.87551	3.73231	7	0.00439096	0.00823529	0.320411	1.3982	2.86082	4	44	0.00341006	0.0909091	1	1	Not associated
MSigDB Pathway	REACTOME_MYD88_MAL_CASCADE_INITIATED_ON_PLASMA_MEMBRANE	Genes involved in MyD88:Mal cascade initiated on plasma membrane	0.0842893	1.57897	7.59991	12	0.00894107	0.0141177	0.0395201	1.87564	5.33152	10	82	0.00852515	0.121951	1	1	Not associated
MSigDB Pathway	REACTOME_TRANSCRIPTIONAL_REGULATION_OF_WHITE_ADIPOCYTE_DIFFERENTIATION	Genes involved in Transcriptional Regulation of White Adipocyte Differentiation	0.0844306	1.57849	7.60222	12	0.00894379	0.0141177	0.0430977	1.92253	4.68134	9	72	0.00767263	0.125	1	1	Not associated
MSigDB Pathway	BIOCARTA_CCR5_PATHWAY	Pertussis toxin-insensitive CCR5 Signaling in Macrophage	0.0846326	2.16467	2.30983	5	0.00271744	0.00588235	0.00368844	4.5236	1.10532	5	17	0.00426258	0.294118	1	1	Not associated
MSigDB Pathway	BIOCARTA_CHEMICAL_PATHWAY	Apoptotic Signaling in Response to DNA Damage	0.0846428	2.43478	1.64286	4	0.00193277	0.00470588	0.0508998	2.7964	1.43041	4	22	0.00341006	0.181818	1	1	Not associated
GO Molecular Function	GO:0016780	phosphotransferase activity, for other substituted phosphate groups	0.0850106	2.92434	1.02587	3	0.00120691	0.00352941	0.635356	1.02535	0.975279	1	15	0.000852515	0.0666667	1	1	Not associated
GO Molecular Function	GO:0016301	kinase activity	0.0850694	1.16054	74.1035	86	0.0871806	0.101177	0.0278524	1.26159	53.9004	68	829	0.057971	0.0820265	1	1	Not associated
GO Molecular Function	GO:0046966	thyroid hormone receptor binding	0.0853721	2.42725	1.64795	4	0.00193877	0.00470588	0.531665	1.13928	1.7555	2	27	0.00170503	0.0740741	1	1	Not associated
MSigDB Pathway	WNT_SIGNALING	Genes related to Wnt-mediated signal transduction	0.0861055	1.5132	9.2519	14	0.0108846	0.0164706	0.123801	1.5553	5.78665	9	89	0.00767263	0.101124	1	1	Not associated
MSigDB Pathway	PID_S1P_META_PATHWAY	Sphingosine 1-phosphate (S1P) pathway	0.0861699	2.4191	1.65351	4	0.0019453	0.00470588	0.152822	2.19718	1.36539	3	21	0.00255755	0.142857	1	1	Not associated
MSigDB Pathway	BIOCARTA_SPRY_PATHWAY	Sprouty regulation of tyrosine kinase signals	0.0862259	2.1521	2.32331	5	0.0027333	0.00588235	0.0261297	3.41783	1.17033	4	18	0.00341006	0.222222	1	1	Not associated
MSigDB Pathway	KEGG_REGULATION_OF_ACTIN_CYTOSKELETON	Regulation of actin cytoskeleton	0.0862591	1.33788	19.4338	26	0.0228633	0.0305882	0.0970935	1.37842	13.7839	19	212	0.0161978	0.0896226	1	1	Not associated
GO Molecular Function	GO:0005326	neurotransmitter transporter activity	0.0863169	2.41761	1.65452	4	0.0019465	0.00470588	0.20242	1.92253	1.56045	3	24	0.00255755	0.125	1	1	Not associated
GO Cellular Component	GO:0030137	COPI-coated vesicle	0.0867418	2.8985	1.03502	3	0.00121767	0.00352941	0.107923	2.56337	1.17033	3	18	0.00255755	0.166667	1	1	Not associated
MSigDB Pathway	PID_PRLSIGNALINGEVENTSPATHWAY	Signaling events mediated by PRL	0.0869736	2.41099	1.65907	4	0.00195185	0.00470588	0.185468	2.00612	1.49543	3	23	0.00255755	0.130435	1	1	Not associated
MSigDB Pathway	BIOCARTA_PARKIN_PATHWAY	Role of Parkin in the Ubiquitin-Proteasomal Pathway	0.086983	2.4109	1.65914	4	0.00195192	0.00470588	0.553804	1.28168	0.780223	1	12	0.000852515	0.0833333	1	1	Not associated
GO Cellular Component	GO:0032155	cell division site part	0.0870864	1.97718	3.03463	6	0.00357015	0.00705882	0.305411	1.43072	2.7958	4	43	0.00341006	0.0930233	1	1	Not associated
GO Cellular Component	GO:0005794	Golgi apparatus	0.0873284	1.12879	106.309	120	0.125069	0.141177	0.0108175	1.25424	78.9325	99	1214	0.084399	0.0815486	1	1	Not associated
MSigDB Pathway	BIOCARTA_BARRESTIN_SRC_PATHWAY	Roles of fl-arrestin-dependent Recruitment of Src Kinases in GPCR Signaling	0.0876123	2.88577	1.03958	3	0.00122304	0.00352941	0.0693903	3.07604	0.975279	3	15	0.00255755	0.2	1	1	Not associated
GO Cellular Component	GO:0044798	nuclear transcription factor complex	0.0882704	1.85347	3.7767	7	0.00444318	0.00823529	0.468541	1.11451	4.48628	5	69	0.00426258	0.0724638	1	1	Not associated
MSigDB Pathway	SIG_PIP3_SIGNALING_IN_CARDIAC_MYOCTES	Genes related to PIP3 signaling in cardiac myocytes	0.0884977	1.60187	6.86698	11	0.0080788	0.0129412	0.143752	1.60689	4.35624	7	67	0.0059676	0.104478	1	1	Not associated
MSigDB Pathway	REACTOME_GAB1_SIGNALOSOME	Genes involved in GAB1 signalosome	0.0890056	1.96518	3.05315	6	0.00359194	0.00705882	0.20409	1.70891	2.34067	4	36	0.00341006	0.111111	1	1	Not associated
GO Molecular Function	GO:0015197	peptide transporter activity	0.0895651	4.01576	0.498038	2	0.000585927	0.00235294	0.134391	3.07604	0.650186	2	10	0.00170503	0.2	1	1	Not associated
GO Molecular Function	GO:0016799	hydrolase activity, hydrolyzing N-glycosyl compounds	0.0898231	2.85416	1.0511	3	0.00123659	0.00352941	0.423624	1.3982	1.43041	2	22	0.00170503	0.0909091	1	1	Not associated
MSigDB Pathway	KEGG_NOTCH_SIGNALING_PATHWAY	Notch signaling pathway	0.0903204	1.95713	3.06572	6	0.00360673	0.00705882	0.365626	1.30896	3.05587	4	47	0.00341006	0.0851064	1	1	Not associated
MSigDB Pathway	BIOCARTA_GPCR_PATHWAY	Signaling Pathway from G-Protein Families	0.0903624	1.84246	3.79926	7	0.00446972	0.00823529	0.0668579	2.2618	2.21063	5	34	0.00426258	0.147059	1	1	Not associated
MSigDB Pathway	REACTOME_ACTIVATION_OF_CHAPERONE_GENES_BY_XBP1S	Genes involved in Activation of Chaperone Genes by XBP1(S)	0.0903908	2.37747	1.68246	4	0.00197937	0.00470588	0.335463	1.36713	2.92584	4	45	0.00341006	0.0888889	1	1	Not associated
GO Molecular Function	GO:0015205	nucleobase transmembrane transporter activity	0.0907893	3.98346	0.502075	2	0.000590677	0.00235294	0.0531656	5.12674	0.390111	2	6	0.00170503	0.333333	1	1	Not associated
GO Molecular Function	GO:0031432	titin binding	0.091192	2.83509	1.05817	3	0.0012449	0.00352941	0.0582344	3.29576	0.91026	3	14	0.00255755	0.214286	1	1	Not associated
MSigDB Pathway	KEGG_VASOPRESSIN_REGULATED_WATER_REABSORPTION	Vasopressin-regulated water reabsorption	0.0912093	1.95175	3.07416	6	0.00361666	0.00705882	0.155412	1.74775	2.86082	5	44	0.00426258	0.113636	1	1	Not associated
GO Cellular Component	GO:0005576	extracellular region	0.0915909	1.09794	161.211	177	0.18966	0.208235	0.351025	1.0319	142.456	147	2191	0.12532	0.0670927	1	1	Not associated
GO Molecular Function	GO:0015291	secondary active transmembrane transporter activity	0.0917334	1.37741	15.246	21	0.0179364	0.0247059	0.248223	1.22065	12.2885	15	189	0.0127877	0.0793651	1	1	Not associated
MSigDB Pathway	REACTOME_TRANSPORT_OF_VITAMINS_NUCLEOSIDES_AND_RELATED_MOLECULES	Genes involved in Transport of vitamins, nucleosides, and related molecules	0.0919156	2.10933	2.37042	5	0.00278873	0.00588235	0.32757	1.48841	2.01558	3	31	0.00255755	0.0967742	1	1	Not associated
GO Molecular Function	GO:0019205	nucleobase-containing compound kinase activity	0.0927171	1.83039	3.82431	7	0.00449919	0.00823529	0.0965493	1.88329	3.18591	6	49	0.00511509	0.122449	1	1	Not associated
GO Molecular Function	GO:0061134	peptidase regulator activity	0.0933735	1.41468	12.7237	18	0.0149691	0.0211765	0.160979	1.30082	13.0687	17	201	0.0144928	0.0845771	1	1	Not associated
GO Molecular Function	GO:0046965	retinoid X receptor binding	0.0937722	2.80014	1.07137	3	0.00126044	0.00352941	0.609978	1.09859	0.91026	1	14	0.000852515	0.0714286	1	1	Not associated
GO Molecular Function	GO:0005343	organic acid:sodium symporter activity	0.0941245	2.09354	2.3883	5	0.00280976	0.00588235	0.105267	2.19718	1.82052	4	28	0.00341006	0.142857	1	1	Not associated
MSigDB Pathway	REACTOME_NEGATIVE_REGULATION_OF_FGFR_SIGNALING	Genes involved in Negative regulation of FGFR signaling	0.0946881	1.82054	3.845	7	0.00452353	0.00823529	0.08158	2.13614	2.34067	5	36	0.00426258	0.138889	1	1	Not associated
MSigDB Pathway	REACTOME_SPRY_REGULATION_OF_FGF_SIGNALING	Genes involved in Spry regulation of FGF signaling	0.095274	2.78037	1.07899	3	0.0012694	0.00352941	0.0480085	3.54928	0.845241	3	13	0.00255755	0.230769	1	1	Not associated
MSigDB Pathway	REACTOME_SEMA4D_IN_SEMAPHORIN_SIGNALING	Genes involved in Sema4D in semaphorin signaling	0.0954177	2.33085	1.71611	4	0.00201895	0.00470588	0.291173	1.59106	1.88554	3	29	0.00255755	0.103448	1	1	Not associated
GO Molecular Function	GO:0008440	inositol-1,4,5-trisphosphate 3-kinase activity	0.0958593	3.85633	0.518627	2	0.00061015	0.00235294	0.375423	2.19718	0.45513	1	7	0.000852515	0.142857	1	1	Not associated
PANTHER Pathway	P00038	JAK/STAT signaling pathway	0.0959224	2.77196	1.08227	3	0.00127325	0.00352941	0.635356	1.02535	0.975279	1	15	0.000852515	0.0666667	1	1	Not associated
MSigDB Pathway	REACTOME_CELL_SURFACE_INTERACTIONS_AT_THE_VASCULAR_WALL	Genes involved in Cell surface interactions at the vascular wall	0.0963569	1.61722	6.18343	10	0.00727463	0.0117647	0.467297	1.09859	5.46156	6	84	0.00511509	0.0714286	1	1	Not associated
GO Molecular Function	GO:0016765	transferase activity, transferring alkyl or aryl (other than methyl) groups	0.0967535	2.07529	2.4093	5	0.00283447	0.00588235	0.260595	1.45096	3.44598	5	53	0.00426258	0.0943396	1	1	Not associated
GO Molecular Function	GO:0008762	UDP-N-acetylmuramate dehydrogenase activity	0.0968943	3.8316	0.521975	2	0.000614088	0.00235294	0.331975	2.56337	0.390111	1	6	0.000852515	0.166667	1	1	Not associated
MSigDB Pathway	KEGG_MAPK_SIGNALING_PATHWAY	MAPK signaling pathway	0.0971727	1.27408	25.9011	33	0.0304719	0.0388235	0.0965446	1.33489	17.2299	23	265	0.0196078	0.0867924	1	1	Not associated
MSigDB Pathway	REACTOME_SYNTHESIS_OF_GLYCOSYLPHOSPHATIDYLINOSITOL_GPI	Genes involved in Synthesis of glycosylphosphatidylinositol (GPI)	0.0973389	2.75385	1.08939	3	0.00128163	0.00352941	0.304116	1.80944	1.10532	2	17	0.00170503	0.117647	1	1	Not associated
MSigDB Pathway	BIOCARTA_CARM1_PATHWAY	Transcription Regulation by Methyltransferase of CARM1	0.0973873	2.75323	1.08963	3	0.00128192	0.00352941	0.582835	1.18309	0.845241	1	13	0.000852515	0.0769231	1	1	Not associated
MSigDB Pathway	KEGG_ARACHIDONIC_ACID_METABOLISM	Arachidonic acid metabolism	0.0974792	2.07035	2.41505	5	0.00284123	0.00588235	0.311818	1.34914	3.70606	5	57	0.00426258	0.0877193	1	1	Not associated
GO Molecular Function	GO:0003824	catalytic activity	0.0976956	1.05187	370.767	390	0.436196	0.458823	0.387915	1.0134	357.212	362	5494	0.30861	0.0658901	1	1	Not associated
PANTHER Pathway	P00046	Oxidative stress response	0.0983968	1.72244	4.64458	8	0.00546421	0.00941177	0.0279353	2.34047	2.99085	7	46	0.0059676	0.152174	1	1	Not associated
GO Cellular Component	GO:0031253	cell projection membrane	0.0985685	1.31684	19.7442	26	0.0232285	0.0305882	0.202242	1.24145	14.4991	18	223	0.0153453	0.0807175	1	1	Not associated
GO Cellular Component	GO:0031594	neuromuscular junction	0.0989252	1.60838	6.21744	10	0.00731464	0.0117647	0.00434853	3.00102	2.66576	8	41	0.00682012	0.195122	1	1	Not associated
MSigDB Pathway	REACTOME_SCF_BETA_TRCP_MEDIATED_DEGRADATION_OF_EMI1	Genes involved in SCF-beta-TrCP mediated degradation of Emi1	0.0991076	2.05943	2.42786	5	0.00285631	0.00588235	0.235768	1.50787	3.31595	5	51	0.00426258	0.0980392	1	1	Not associated
GO Molecular Function	GO:0016655	oxidoreductase activity, acting on NAD(P)H, quinone or similar compound as acceptor	0.0991145	2.05938	2.42792	5	0.00285637	0.00588235	0.566612	1.00854	3.96613	4	61	0.00341006	0.0655738	1	1	Not associated
MSigDB Pathway	REACTOME_ASSOCIATION_OF_LICENSING_FACTORS_WITH_THE_PRE_REPLICATIVE_COMPLEX	Genes involved in Association of licensing factors with the pre-replicative complex	0.0992719	3.77625	0.529626	2	0.000623089	0.00235294	0.205441	2.36619	0.845241	2	13	0.00170503	0.153846	1	1	Not associated
GO Molecular Function	GO:0005283	sodium:amino acid symporter activity	0.0994242	2.72779	1.09979	3	0.00129387	0.00352941	0.134391	3.07604	0.650186	2	10	0.00170503	0.2	1	1	Not associated
MSigDB Pathway	KEGG_GLYCOSYLPHOSPHATIDYLINOSITOL_GPI_ANCHOR_BIOSYNTHESIS	Glycosylphosphatidylinositol(GPI)-anchor biosynthesis	0.100057	2.72003	1.10293	3	0.00129756	0.00352941	0.511178	1.18309	1.69048	2	26	0.00170503	0.0769231	1	1	Not associated
MSigDB Pathway	REACTOME_PRE_NOTCH_PROCESSING_IN_GOLGI	Genes involved in Pre-NOTCH Processing in Golgi	0.100494	2.71469	1.1051	3	0.00130011	0.00352941	0.279431	1.92253	1.0403	2	16	0.00170503	0.125	1	1	Not associated
MSigDB Pathway	PID_HDAC_CLASSII_PATHWAY	Signaling events mediated by HDAC Class II	0.100502	1.79272	3.90468	7	0.00459375	0.00823529	0.38201	1.35708	2.21063	3	34	0.00255755	0.0882353	1	1	Not associated
GO Cellular Component	GO:0015934	large ribosomal subunit	0.100605	1.89827	3.16078	6	0.00371856	0.00705882	0.727043	0.820279	4.87639	4	75	0.00341006	0.0533333	1	1	Not associated
MSigDB Pathway	REACTOME_ACTIVATION_OF_THE_PRE_REPLICATIVE_COMPLEX	Genes involved in Activation of the pre-replicative complex	0.101701	2.27659	1.75701	4	0.00206707	0.00470588	0.127535	2.0507	1.95056	4	30	0.00341006	0.133333	1	1	Not associated
GO Cellular Component	GO:0043196	varicosity	0.102406	3.70622	0.539634	2	0.000634863	0.00235294	0.331975	2.56337	0.390111	1	6	0.000852515	0.166667	1	1	Not associated
GO Cellular Component	GO:0005874	microtubule	0.102514	1.24035	31.4427	39	0.0369914	0.0458824	0.223112	1.16706	23.9918	28	369	0.0238704	0.0758808	1	1	Not associated
GO Molecular Function	GO:0043167	ion binding	0.103121	1.04368	433.081	452	0.509507	0.531765	0.0540531	1.06545	392.322	418	6034	0.356351	0.0692741	1	1	Not associated
MSigDB Pathway	KEGG_TYROSINE_METABOLISM	Tyrosine metabolism	0.103609	1.88232	3.18756	6	0.00375007	0.00705882	0.275669	1.50051	2.66576	4	41	0.00341006	0.097561	1	1	Not associated
GO Molecular Function	GO:0003724	RNA helicase activity	0.104384	2.25464	1.77412	4	0.0020872	0.00470588	0.291173	1.59106	1.88554	3	29	0.00255755	0.103448	1	1	Not associated
GO Molecular Function	GO:0005057	receptor signaling protein activity	0.105906	1.42046	11.264	16	0.0132517	0.0188235	0.0398403	1.75774	6.82695	12	105	0.0102302	0.114286	1	1	Not associated
GO Cellular Component	GO:0070469	respiratory chain	0.106254	1.8687	3.21079	6	0.0037774	0.00705882	0.623433	0.937818	5.33152	5	82	0.00426258	0.0609756	1	1	Not associated
MSigDB Pathway	PID_FOXM1PATHWAY	FOXM1 transcription factor network	0.106416	1.86787	3.21221	6	0.00377907	0.00705882	0.125109	1.87564	2.66576	5	41	0.00426258	0.121951	1	1	Not associated
MSigDB Pathway	BIOCARTA_IL12_PATHWAY	IL12 and Stat4 Dependent Signaling Pathway in Th1 Development	0.106707	2.23617	1.78877	4	0.00210444	0.00470588	0.0438227	2.92957	1.36539	4	21	0.00341006	0.190476	1	1	Not associated
MSigDB Pathway	REACTOME_INFLAMMASOMES	Genes involved in Inflammasomes	0.106787	2.6412	1.13585	3	0.00133629	0.00352941	0.279431	1.92253	1.0403	2	16	0.00170503	0.125	1	1	Not associated
GO Molecular Function	GO:0003743	translation initiation factor activity	0.107482	1.8625	3.22148	6	0.00378998	0.00705882	0.512282	1.07931	3.70606	4	57	0.00341006	0.0701754	1	1	Not associated
GO Molecular Function	GO:0016849	phosphorus-oxygen lyase activity	0.107984	2.00326	2.49593	5	0.00293639	0.00588235	0.152822	2.19718	1.36539	3	21	0.00255755	0.142857	1	1	Not associated
MSigDB Pathway	BIOCARTA_RAS_PATHWAY	Ras Signaling Pathway	0.108004	2.22608	1.79688	4	0.00211398	0.00470588	0.185468	2.00612	1.49543	3	23	0.00255755	0.130435	1	1	Not associated
GO Cellular Component	GO:0030914	STAGA complex	0.108043	3.58796	0.557419	2	0.000655787	0.00235294	0.205441	2.36619	0.845241	2	13	0.00170503	0.153846	1	1	Not associated
MSigDB Pathway	BIOCARTA_RB_PATHWAY	RB Tumor Suppressor/Checkpoint Signaling in response to DNA damage	0.108107	3.58667	0.55762	2	0.000656023	0.00235294	0.205441	2.36619	0.845241	2	13	0.00170503	0.153846	1	1	Not associated
GO Molecular Function	GO:0035258	steroid hormone receptor binding	0.10853	1.53866	7.14908	11	0.00841068	0.0129412	0.12817	1.65633	4.22621	7	65	0.0059676	0.107692	1	1	Not associated
GO Molecular Function	GO:0015294	solute:cation symporter activity	0.108586	1.62383	5.54246	9	0.00652054	0.0105882	0.273551	1.32916	5.2665	7	81	0.0059676	0.0864198	1	1	Not associated
GO Molecular Function	GO:0017110	nucleoside-diphosphatase activity	0.108681	3.57515	0.559418	2	0.000658139	0.00235294	0.582835	1.18309	0.845241	1	13	0.000852515	0.0769231	1	1	Not associated
MSigDB Pathway	PID_CD8TCRPATHWAY	TCR signaling in na&amp;#xef;ve CD8+ T cells	0.109464	1.75303	3.99309	7	0.00469775	0.00823529	0.440357	1.18309	3.38097	4	52	0.00341006	0.0769231	1	1	Not associated
MSigDB Pathway	PID_RHOA_PATHWAY	RhoA signaling pathway	0.109496	1.75289	3.9934	7	0.00469812	0.00823529	0.0696716	2.0507	2.92584	6	45	0.00511509	0.133333	1	1	Not associated
MSigDB Pathway	REACTOME_ABORTIVE_ELONGATION_OF_HIV1_TRANSCRIPT_IN_THE_ABSENCE_OF_TAT	Genes involved in Abortive elongation of HIV-1 transcript in the absence of Tat	0.109594	3.55701	0.56227	2	0.000661495	0.00235294	0.787164	0.668705	1.49543	1	23	0.000852515	0.0434783	1	1	Not associated
GO Cellular Component	GO:0071565	nBAF complex	0.110421	2.60129	1.15328	3	0.00135679	0.00352941	0.18122	2.56337	0.780223	2	12	0.00170503	0.166667	1	1	Not associated
GO Molecular Function	GO:0051015	actin filament binding	0.110481	1.57124	6.36442	10	0.00748755	0.0117647	0.119731	1.61897	4.94141	8	76	0.00682012	0.105263	1	1	Not associated
GO Cellular Component	GO:0016528	sarcoplasm	0.11064	1.57075	6.36637	10	0.00748985	0.0117647	0.566612	1.00854	3.96613	4	61	0.00341006	0.0655738	1	1	Not associated
MSigDB Pathway	PID_INTEGRIN5_PATHWAY	Beta5 beta6 beta7 and beta8 integrin cell surface interactions	0.11104	2.203	1.81571	4	0.00213613	0.00470588	0.021398	3.61888	1.10532	4	17	0.00341006	0.235294	1	1	Not associated
GO Molecular Function	GO:0016831	carboxy-lyase activity	0.111058	1.98503	2.51885	5	0.00296336	0.00588235	0.38201	1.35708	2.21063	3	34	0.00255755	0.0882353	1	1	Not associated
GO Molecular Function	GO:0016504	peptidase activator activity	0.111465	1.98266	2.52187	5	0.0029669	0.00588235	0.190478	1.75774	2.27565	4	35	0.00341006	0.114286	1	1	Not associated
GO Molecular Function	GO:0009975	cyclase activity	0.111685	1.98138	2.52349	5	0.00296882	0.00588235	0.168915	2.0973	1.43041	3	22	0.00255755	0.136364	1	1	Not associated
MSigDB Pathway	REACTOME_O_LINKED_GLYCOSYLATION_OF_MUCINS	Genes involved in O-linked glycosylation of mucins	0.111697	1.56756	6.37935	10	0.00750512	0.0117647	0.0274974	2.19718	3.64104	8	56	0.00682012	0.142857	1	1	Not associated
GO Molecular Function	GO:0032182	small conjugating protein binding	0.111742	1.61328	5.57871	9	0.00656319	0.0105882	0.361482	1.23042	4.87639	6	75	0.00511509	0.08	1	1	Not associated
MSigDB Pathway	REACTOME_PIP3_ACTIVATES_AKT_SIGNALING	Genes involved in PIP3 activates AKT signaling	0.112119	2.19498	1.82234	4	0.00214393	0.00470588	0.25509	1.70891	1.7555	3	27	0.00255755	0.111111	1	1	Not associated
MSigDB Pathway	SIG_PIP3_SIGNALING_IN_B_LYMPHOCYTES	Genes related to PIP3 signaling in B lymphocytes	0.112495	1.74039	4.0221	7	0.00473188	0.00823529	0.20409	1.70891	2.34067	4	36	0.00341006	0.111111	1	1	Not associated
MSigDB Pathway	REACTOME_SULFUR_AMINO_ACID_METABOLISM	Genes involved in Sulfur amino acid metabolism	0.112516	2.19205	1.82478	4	0.0021468	0.00470588	0.468477	1.28168	1.56045	2	24	0.00170503	0.0833333	1	1	Not associated
PANTHER Pathway	P04379	Beta3 adrenergic receptor signaling pathway	0.112972	2.1887	1.82757	4	0.00215009	0.00470588	0.511178	1.18309	1.69048	2	26	0.00170503	0.0769231	1	1	Not associated
PANTHER Pathway	P05917	Opioid proopiomelanocortin pathway	0.113111	1.97317	2.53399	5	0.00298117	0.00588235	0.345777	1.4419	2.08059	3	32	0.00255755	0.09375	1	1	Not associated
GO Molecular Function	GO:0051219	phosphoprotein binding	0.113793	1.73508	4.0344	7	0.00474635	0.00823529	0.075932	2.00612	2.99085	6	46	0.00511509	0.130435	1	1	Not associated
MSigDB Pathway	KEGG_OOCYTE_MEIOSIS	Oocyte meiosis	0.114834	1.41981	10.5648	15	0.0124291	0.0176471	0.111756	1.51056	7.28208	11	112	0.00937766	0.0982143	1	1	Not associated
GO Cellular Component	GO:0005682	U5 snRNP	0.11514	8.17548	0.122317	1	0.000143902	0.00117647	0.331975	2.56337	0.390111	1	6	0.000852515	0.166667	1	1	Not associated
GO Molecular Function	GO:0004969	histamine receptor activity	0.115529	3.44435	0.580661	2	0.00068313	0.00235294	0.0712839	4.39435	0.45513	2	7	0.00170503	0.285714	1	1	Not associated
GO Cellular Component	GO:0030662	coated vesicle membrane	0.116023	1.38355	12.2872	17	0.0144556	0.02	0.470814	1.06071	9.42769	10	145	0.00852515	0.0689655	1	1	Not associated
GO Molecular Function	GO:0019902	phosphatase binding	0.116327	1.38297	12.2924	17	0.0144616	0.02	0.32938	1.19226	8.38739	10	129	0.00852515	0.0775194	1	1	Not associated
GO Molecular Function	GO:0005416	cation:amino acid symporter activity	0.116375	2.53943	1.18137	3	0.00138984	0.00352941	0.18122	2.56337	0.780223	2	12	0.00170503	0.166667	1	1	Not associated
GO Cellular Component	GO:0070652	HAUS complex	0.116547	8.07048	0.123908	1	0.000145775	0.00117647	0.454033	1.70891	0.585167	1	9	0.000852515	0.111111	1	1	Not associated
MSigDB Pathway	BIOCARTA_CHREBP2_PATHWAY	Regulation And Function Of ChREBP in Liver	0.116814	1.81778	3.30074	6	0.00388322	0.00705882	0.520055	1.09859	2.73078	3	42	0.00255755	0.0714286	1	1	Not associated
GO Molecular Function	GO:0008092	cytoskeletal protein binding	0.116819	1.15671	60.5166	70	0.071196	0.0823529	0.0377242	1.2687	44.9278	57	691	0.0485934	0.0824891	1	1	Not associated
MSigDB Pathway	REACTOME_PLATELET_SENSITIZATION_BY_LDL	Genes involved in Platelet sensitization by LDL	0.116854	2.53464	1.1836	3	0.00139247	0.00352941	0.25468	2.0507	0.975279	2	15	0.00170503	0.133333	1	1	Not associated
GO Cellular Component	GO:0001726	ruffle	0.117154	1.38141	12.3063	17	0.0144779	0.02	0.109401	1.45944	8.90754	13	137	0.0110827	0.0948905	1	1	Not associated
GO Cellular Component	GO:0030426	growth cone	0.117764	1.34153	14.9083	20	0.0175392	0.0235294	0.030736	1.82735	6.56687	12	101	0.0102302	0.118812	1	1	Not associated
GO Cellular Component	GO:0030055	cell-substrate junction	0.117911	1.37999	12.3189	17	0.0144929	0.02	0.318285	1.19143	9.23264	11	142	0.00937766	0.0774648	1	1	Not associated
GO Molecular Function	GO:0030331	estrogen receptor binding	0.117917	1.94634	2.56892	5	0.00302226	0.00588235	0.237287	1.77464	1.69048	3	26	0.00255755	0.115385	1	1	Not associated
MSigDB Pathway	KEGG_HUNTINGTONS_DISEASE	Huntington's disease	0.118168	1.41287	10.6167	15	0.0124902	0.0176471	0.365722	1.12962	11.5083	13	177	0.0110827	0.0734463	1	1	Not associated
MSigDB Pathway	KEGG_VASCULAR_SMOOTH_MUSCLE_CONTRACTION	Vascular smooth muscle contraction	0.118546	1.39451	11.4736	16	0.0134983	0.0188235	0.033854	1.75388	7.41212	13	114	0.0110827	0.114035	1	1	Not associated
GO Molecular Function	GO:0008565	protein transporter activity	0.118598	1.64596	4.86039	8	0.00571811	0.00941177	0.455688	1.11182	5.39654	6	83	0.00511509	0.0722892	1	1	Not associated
MSigDB Pathway	KEGG_COLORECTAL_CANCER	Colorectal cancer	0.119421	1.50898	7.2897	11	0.00857612	0.0129412	0.0200317	2.19718	4.09617	9	63	0.00767263	0.142857	1	1	Not associated
GO Molecular Function	GO:0046915	transition metal ion transmembrane transporter activity	0.119467	2.50892	1.19573	3	0.00140675	0.00352941	0.511178	1.18309	1.69048	2	26	0.00170503	0.0769231	1	1	Not associated
GO Cellular Component	GO:0030666	endocytic vesicle membrane	0.119591	1.42971	9.79219	14	0.0115202	0.0164706	0.0359911	1.73863	7.47713	13	115	0.0110827	0.113044	1	1	Not associated
GO Molecular Function	GO:0051766	inositol trisphosphate kinase activity	0.120096	3.36333	0.59465	2	0.000699588	0.00235294	0.416048	1.92253	0.520149	1	8	0.000852515	0.125	1	1	Not associated
MSigDB Pathway	REACTOME_AUTODEGRADATION_OF_CDH1_BY_CDH1_APC_C	Genes involved in Autodegradation of Cdh1 by Cdh1:APC/C	0.120227	1.93389	2.58547	5	0.00304173	0.00588235	0.324848	1.32588	3.77108	5	58	0.00426258	0.0862069	1	1	Not associated
MSigDB Pathway	KEGG_TOLL_LIKE_RECEPTOR_SIGNALING_PATHWAY	Toll-like receptor signaling pathway	0.122468	1.5366	6.50788	10	0.00765633	0.0117647	0.508142	1.04526	6.69691	7	103	0.0059676	0.0679612	1	1	Not associated
MSigDB Pathway	KEGG_NON_HOMOLOGOUS_END_JOINING	Non-homologous end-joining	0.122562	3.32145	0.602147	2	0.000708408	0.00235294	0.205441	2.36619	0.845241	2	13	0.00170503	0.153846	1	1	Not associated
MSigDB Pathway	BIOCARTA_IL3_PATHWAY	IL 3 signaling pathway	0.123442	3.30682	0.604811	2	0.000711542	0.00235294	0.25468	2.0507	0.975279	2	15	0.00170503	0.133333	1	1	Not associated
MSigDB Pathway	REACTOME_PEPTIDE_CHAIN_ELONGATION	Genes involved in Peptide chain elongation	0.123667	1.78735	3.35692	6	0.00394932	0.00705882	0.665292	0.894199	5.5916	5	86	0.00426258	0.0581395	1	1	Not associated
MSigDB Pathway	BIOCARTA_FREE_PATHWAY	Free Radical Induced Apoptosis	0.124409	3.2909	0.607736	2	0.000714984	0.00235294	0.489548	1.53802	0.650186	1	10	0.000852515	0.1	1	1	Not associated
GO Molecular Function	GO:0004623	phospholipase A2 activity	0.1246	2.46045	1.21929	3	0.00143446	0.00352941	0.291173	1.59106	1.88554	3	29	0.00255755	0.103448	1	1	Not associated
MSigDB Pathway	BIOCARTA_TGFB_PATHWAY	TGF beta signaling pathway	0.124663	1.91071	2.61683	5	0.00307862	0.00588235	0.0314395	3.23794	1.23535	4	19	0.00341006	0.210526	1	1	Not associated
GO Molecular Function	GO:0060090	binding, bridging	0.124797	1.33015	15.0359	20	0.0176893	0.0235294	0.0430792	1.62467	9.23264	15	142	0.0127877	0.105634	1	1	Not associated
GO Cellular Component	GO:0032982	myosin filament	0.125211	2.45485	1.22207	3	0.00143773	0.00352941	0.32864	1.70891	1.17033	2	18	0.00170503	0.111111	1	1	Not associated
GO Molecular Function	GO:0030296	protein tyrosine kinase activator activity	0.125459	2.10286	1.90217	4	0.00223785	0.00470588	0.0387552	3.84505	0.780223	3	12	0.00255755	0.25	1	1	Not associated
GO Molecular Function	GO:0043027	cysteine-type endopeptidase inhibitor activity involved in apoptotic process	0.12557	2.10214	1.90282	4	0.00223862	0.00470588	0.13725	2.30703	1.30037	3	20	0.00255755	0.15	1	1	Not associated
MSigDB Pathway	PID_IL4_2PATHWAY	IL4-mediated signaling events	0.125792	1.62194	4.93236	8	0.00580278	0.00941177	0.214196	1.48841	4.03115	6	62	0.00511509	0.0967742	1	1	Not associated
GO Molecular Function	GO:0008509	anion transmembrane transporter activity	0.125877	1.30006	17.6915	23	0.0208135	0.0270588	0.461588	1.04716	15.2794	16	235	0.0136402	0.0680851	1	1	Not associated
MSigDB Pathway	PID_S1P_S1P3_PATHWAY	S1P3 pathway	0.126005	1.90388	2.62621	5	0.00308966	0.00588235	0.116167	2.12141	1.88554	4	29	0.00341006	0.137931	1	1	Not associated
GO Molecular Function	GO:0034713	type I transforming growth factor beta receptor binding	0.126405	2.44401	1.22749	3	0.0014441	0.00352941	0.0712839	4.39435	0.45513	2	7	0.00170503	0.285714	1	1	Not associated
GO Molecular Function	GO:0005198	structural molecule activity	0.126423	1.19145	39.4476	47	0.046409	0.0552941	0.727997	0.920391	41.2868	38	635	0.0323956	0.0598425	1	1	Not associated
MSigDB Pathway	REACTOME_RESPIRATORY_ELECTRON_TRANSPORT_ATP_SYNTHESIS_BY_CHEMIOSMOTIC_COUPLING_AND_HEAT_PRODUCTION_BY_UNCOUPLING_PROTEINS_	Genes involved in Respiratory electron transport, ATP synthesis by chemiosmotic coupling, and heat production by uncoupling proteins.	0.126452	1.68647	4.15069	7	0.00488317	0.00823529	0.567844	0.992272	6.04673	6	93	0.00511509	0.0645161	1	1	Not associated
MSigDB Pathway	REACTOME_SIGNALING_BY_FGFR3_MUTANTS	Genes involved in Signaling by FGFR3 mutants	0.127222	2.43667	1.23119	3	0.00144845	0.00352941	0.522756	1.3982	0.715204	1	11	0.000852515	0.0909091	1	1	Not associated
GO Molecular Function	GO:0018024	histone-lysine N-methyltransferase activity	0.127401	1.77154	3.38689	6	0.00398457	0.00705882	0.125109	1.87564	2.66576	5	41	0.00426258	0.121951	1	1	Not associated
GO Cellular Component	GO:0030665	clathrin-coated vesicle membrane	0.128109	1.41204	9.9147	14	0.0116644	0.0164706	0.539001	1.01568	6.89197	7	106	0.0059676	0.0660377	1	1	Not associated
GO Cellular Component	GO:0043233	organelle lumen	0.128247	1.07538	189.701	204	0.223177	0.24	0.54019	0.99552	178.801	178	2750	0.151748	0.0647273	1	1	Not associated
MSigDB Pathway	KEGG_BIOSYNTHESIS_OF_UNSATURATED_FATTY_ACIDS	Biosynthesis of unsaturated fatty acids	0.128747	2.42313	1.23807	3	0.00145655	0.00352941	0.423624	1.3982	1.43041	2	22	0.00170503	0.0909091	1	1	Not associated
GO Cellular Component	GO:0030427	site of polarized growth	0.128769	1.32398	15.106	20	0.0177717	0.0235294	0.0398403	1.75774	6.82695	12	105	0.0102302	0.114286	1	1	Not associated
MSigDB Pathway	REACTOME_ACTIVATED_NOTCH1_TRANSMITS_SIGNAL_TO_THE_NUCLEUS	Genes involved in Activated NOTCH1 Transmits Signal to the Nucleus	0.129064	2.07996	1.92311	4	0.00226248	0.00470588	0.0849682	2.36619	1.69048	4	26	0.00341006	0.153846	1	1	Not associated
GO Cellular Component	GO:0005851	eukaryotic translation initiation factor 2B complex	0.129267	7.225	0.138408	1	0.000162833	0.00117647	0.331975	2.56337	0.390111	1	6	0.000852515	0.166667	1	1	Not associated
MSigDB Pathway	PID_PTP1BPATHWAY	Signaling events mediated by PTP1B	0.129926	1.5578	5.77739	9	0.00679693	0.0105882	0.248102	1.47887	3.38097	5	52	0.00426258	0.0961538	1	1	Not associated
GO Cellular Component	GO:0060053	neurofilament cytoskeleton	0.12999	2.07421	1.92845	4	0.00226876	0.00470588	0.0387552	3.84505	0.780223	3	12	0.00255755	0.25	1	1	Not associated
PANTHER Pathway	P00056	VEGF signaling pathway	0.130089	1.55733	5.7791	9	0.00679894	0.0105882	0.0362453	2.08545	3.8361	8	59	0.00682012	0.135593	1	1	Not associated
GO Molecular Function	GO:0042301	phosphate ion binding	0.130812	3.18997	0.626965	2	0.000737605	0.00235294	0.522756	1.3982	0.715204	1	11	0.000852515	0.0909091	1	1	Not associated
PANTHER Pathway	P00036	Interleukin signaling pathway	0.131078	1.51373	6.60618	10	0.00777198	0.0117647	0.136616	1.52112	5.91669	9	91	0.00767263	0.0989011	1	1	Not associated
MSigDB Pathway	PID_IL3_PATHWAY	IL3-mediated signaling events	0.131331	2.06596	1.93615	4	0.00227782	0.00470588	0.0948607	2.27855	1.7555	4	27	0.00341006	0.148148	1	1	Not associated
MSigDB Pathway	KEGG_GLUTATHIONE_METABOLISM	Glutathione metabolism	0.131676	2.06385	1.93813	4	0.00228015	0.00470588	0.410682	1.23042	3.25093	4	50	0.00341006	0.08	1	1	Not associated
GO Cellular Component	GO:0030863	cortical cytoskeleton	0.131749	1.66763	4.19758	7	0.00493833	0.00823529	0.337935	1.30341	3.8361	5	59	0.00426258	0.0847458	1	1	Not associated
GO Cellular Component	GO:0031672	A band	0.132334	1.87275	2.66987	5	0.00314102	0.00588235	0.273069	1.64788	1.82052	3	28	0.00255755	0.107143	1	1	Not associated
MSigDB Pathway	REACTOME_TRANSPORT_OF_ORGANIC_ANIONS	Genes involved in Transport of organic anions	0.132508	2.39062	1.25491	3	0.00147636	0.00352941	0.157476	2.7964	0.715204	2	11	0.00170503	0.181818	1	1	Not associated
MSigDB Pathway	KEGG_GLYCOSPHINGOLIPID_BIOSYNTHESIS_GANGLIO_SERIES	Glycosphingolipid biosynthesis - ganglio series	0.132536	2.39039	1.25503	3	0.0014765	0.00352941	0.25468	2.0507	0.975279	2	15	0.00170503	0.133333	1	1	Not associated
GO Cellular Component	GO:0016459	myosin complex	0.132975	1.59933	5.00211	8	0.00588483	0.00941177	0.429805	1.16517	4.29123	5	66	0.00426258	0.0757576	1	1	Not associated
GO Molecular Function	GO:0019207	kinase regulator activity	0.133078	1.35316	12.5632	17	0.0147803	0.02	0.24725	1.27205	8.64747	11	133	0.00937766	0.0827068	1	1	Not associated
GO Molecular Function	GO:0070412	R-SMAD binding	0.133933	1.86515	2.68074	5	0.00315382	0.00588235	0.0314395	3.23794	1.23535	4	19	0.00341006	0.210526	1	1	Not associated
GO Molecular Function	GO:0002039	p53 binding	0.134388	1.65854	4.22059	7	0.0049654	0.00823529	0.235768	1.50787	3.31595	5	51	0.00426258	0.0980392	1	1	Not associated
MSigDB Pathway	BIOCARTA_IGF1_PATHWAY	IGF-1 Signaling Pathway	0.134779	1.86117	2.68648	5	0.00316056	0.00588235	0.0438227	2.92957	1.36539	4	21	0.00341006	0.190476	1	1	Not associated
GO Molecular Function	GO:0005525	GTP binding	0.135071	1.22897	26.8517	33	0.0315902	0.0388235	0.298794	1.11932	24.1219	27	371	0.0230179	0.0727763	1	1	Not associated
MSigDB Pathway	KEGG_PATHWAYS_IN_CANCER	Pathways in cancer	0.135076	1.19446	35.9997	43	0.0423525	0.0505882	0.0225829	1.45806	21.2611	31	327	0.026428	0.0948012	1	1	Not associated
GO Molecular Function	GO:0005112	Notch binding	0.135675	2.36415	1.26895	3	0.00149289	0.00352941	0.553804	1.28168	0.780223	1	12	0.000852515	0.0833333	1	1	Not associated
GO Molecular Function	GO:0008601	protein phosphatase type 2A regulator activity	0.135954	2.03826	1.96246	4	0.00230877	0.00470588	0.376883	1.53802	1.30037	2	20	0.00170503	0.1	1	1	Not associated
GO Cellular Component	GO:0042589	zymogen granule membrane	0.136147	3.1113	0.642819	2	0.000756257	0.00235294	0.0910495	3.84505	0.520149	2	8	0.00170503	0.25	1	1	Not associated
GO Molecular Function	GO:0008276	protein methyltransferase activity	0.137036	1.5382	5.851	9	0.00688352	0.0105882	0.314563	1.29974	4.61632	6	71	0.00511509	0.084507	1	1	Not associated
GO Cellular Component	GO:0005783	endoplasmic reticulum	0.137203	1.10836	99.2454	110	0.116759	0.129412	0.4494	1.01697	87.515	89	1346	0.0758738	0.0661218	1	1	Not associated
MSigDB Pathway	BIOCARTA_NFKB_PATHWAY	NF-kB Signaling Pathway	0.137295	2.03044	1.97002	4	0.00231767	0.00470588	0.423624	1.3982	1.43041	2	22	0.00170503	0.0909091	1	1	Not associated
MSigDB Pathway	BIOCARTA_TEL_PATHWAY	Telomeres, Telomerase, Cellular Aging, and Immortality	0.138166	2.0254	1.97492	4	0.00232343	0.00470588	0.107923	2.56337	1.17033	3	18	0.00255755	0.166667	1	1	Not associated
GO Molecular Function	GO:0004672	protein kinase activity	0.138375	1.14754	57.5142	66	0.0676637	0.0776471	0.049753	1.27088	38.556	49	593	0.0417732	0.0826307	1	1	Not associated
GO Molecular Function	GO:0070530	K63-linked polyubiquitin binding	0.138377	3.07974	0.649406	2	0.000764007	0.00235294	0.134391	3.07604	0.650186	2	10	0.00170503	0.2	1	1	Not associated
GO Cellular Component	GO:0031307	integral to mitochondrial outer membrane	0.138455	3.07866	0.649634	2	0.000764275	0.00235294	0.25468	2.0507	0.975279	2	15	0.00170503	0.133333	1	1	Not associated
GO Cellular Component	GO:0016020	membrane	0.138961	1.02938	536.243	552	0.630874	0.649412	0.0347424	1.05942	510.656	541	7854	0.461211	0.0688821	1	1	Not associated
GO Cellular Component	GO:0044463	cell projection part	0.139435	1.13697	65.0853	74	0.076571	0.0870588	0.0617294	1.24507	40.9617	51	630	0.0434783	0.0809524	1	1	Not associated
MSigDB Pathway	KEGG_NEUROTROPHIN_SIGNALING_PATHWAY	Neurotrophin signaling pathway	0.139557	1.35656	11.7945	16	0.0138759	0.0188235	0.123265	1.45325	8.25736	12	127	0.0102302	0.0944882	1	1	Not associated
GO Cellular Component	GO:0034045	pre-autophagosomal structure membrane	0.140145	3.05526	0.654609	2	0.000770128	0.00235294	0.157476	2.7964	0.715204	2	11	0.00170503	0.181818	1	1	Not associated
GO Cellular Component	GO:0005844	polysome	0.140962	1.83292	2.72789	5	0.00320929	0.00588235	0.531665	1.13928	1.7555	2	27	0.00170503	0.0740741	1	1	Not associated
MSigDB Pathway	KEGG_GLYCOSAMINOGLYCAN_DEGRADATION	Glycosaminoglycan degradation	0.141051	2.009	1.99104	4	0.00234241	0.00470588	0.152822	2.19718	1.36539	3	21	0.00255755	0.142857	1	1	Not associated
MSigDB Pathway	ST_P38_MAPK_PATHWAY	p38 MAPK Pathway	0.141088	1.71759	3.49326	6	0.00410972	0.00705882	0.217975	1.66273	2.40569	4	37	0.00341006	0.108108	1	1	Not associated
GO Molecular Function	GO:0016787	hydrolase activity	0.141667	1.07748	167.057	180	0.196537	0.211765	0.62698	0.979265	156.24	153	2403	0.130435	0.0636704	1	1	Not associated
MSigDB Pathway	REACTOME_GABA_B_RECEPTOR_ACTIVATION	Genes involved in GABA B receptor activation	0.141823	1.6339	4.28423	7	0.00504027	0.00823529	0.0978738	2.02371	2.47071	5	38	0.00426258	0.131579	1	1	Not associated
GO Molecular Function	GO:0017070	U6 snRNA binding	0.141953	6.53243	0.153082	1	0.000180097	0.00117647	0.331975	2.56337	0.390111	1	6	0.000852515	0.166667	1	1	Not associated
MSigDB Pathway	PID_TAP63PATHWAY	Validated transcriptional targets of TAp63 isoforms	0.142199	1.63269	4.2874	7	0.005044	0.00823529	0.260595	1.45096	3.44598	5	53	0.00426258	0.0943396	1	1	Not associated
GO Molecular Function	GO:0034236	protein kinase A catalytic subunit binding	0.142326	2.00188	1.99813	4	0.00235074	0.00470588	0.157476	2.7964	0.715204	2	11	0.00170503	0.181818	1	1	Not associated
MSigDB Pathway	KEGG_ADIPOCYTOKINE_SIGNALING_PATHWAY	Adipocytokine signaling pathway	0.142371	1.52415	5.90492	9	0.00694697	0.0105882	0.143752	1.60689	4.35624	7	67	0.0059676	0.104478	1	1	Not associated
GO Molecular Function	GO:0070492	oligosaccharide binding	0.142444	6.50808	0.153655	1	0.000180771	0.00117647	0.331975	2.56337	0.390111	1	6	0.000852515	0.166667	1	1	Not associated
MSigDB Pathway	BIOCARTA_IL7_PATHWAY	IL-7 Signal Transduction	0.142653	2.00006	1.99994	4	0.00235287	0.00470588	0.304116	1.80944	1.10532	2	17	0.00170503	0.117647	1	1	Not associated
MSigDB Pathway	REACTOME_SLC_MEDIATED_TRANSMEMBRANE_TRANSPORT	Genes involved in SLC-mediated transmembrane transport	0.143801	1.26877	18.916	24	0.0222541	0.0282353	0.594564	0.965286	15.5394	15	239	0.0127877	0.0627615	1	1	Not associated
GO Molecular Function	GO:0048407	platelet-derived growth factor binding	0.144238	2.2964	1.30639	3	0.00153693	0.00352941	0.522756	1.3982	0.715204	1	11	0.000852515	0.0909091	1	1	Not associated
MSigDB Pathway	PID_ARF_3PATHWAY	Arf1 pathway	0.144911	2.99148	0.668566	2	0.000786549	0.00235294	0.35292	1.61897	1.23535	2	19	0.00170503	0.105263	1	1	Not associated
MSigDB Pathway	PID_ERBB1_DOWNSTREAM_PATHWAY	ErbB1 downstream signaling	0.145439	1.3988	9.29365	13	0.0109337	0.0152941	0.0833432	1.59606	6.89197	11	106	0.00937766	0.103774	1	1	Not associated
GO Molecular Function	GO:0048487	beta-tubulin binding	0.145628	1.98377	2.01636	4	0.00237219	0.00470588	0.291173	1.59106	1.88554	3	29	0.00255755	0.103448	1	1	Not associated
GO Cellular Component	GO:0016235	aggresome	0.146122	2.2822	1.31452	3	0.0015465	0.00352941	0.185468	2.00612	1.49543	3	23	0.00255755	0.130435	1	1	Not associated
MSigDB Pathway	REACTOME_P53_INDEPENDENT_G1_S_DNA_DAMAGE_CHECKPOINT	Genes involved in p53-Independent G1/S DNA damage checkpoint	0.146538	1.97887	2.02136	4	0.00237807	0.00470588	0.410682	1.23042	3.25093	4	50	0.00341006	0.08	1	1	Not associated
GO Molecular Function	GO:0015662	ATPase activity, coupled to transmembrane movement of ions, phosphorylative mechanism	0.147278	1.97491	2.02541	4	0.00238283	0.00470588	0.32757	1.48841	2.01558	3	31	0.00255755	0.0967742	1	1	Not associated
PANTHER Pathway	P00048	PI3 kinase pathway	0.14755	1.61582	4.33216	7	0.00509666	0.00823529	0.199909	1.60211	3.12089	5	48	0.00426258	0.104167	1	1	Not associated
GO Cellular Component	GO:0060077	inhibitory synapse	0.147861	2.95352	0.677157	2	0.000796656	0.00235294	0.331975	2.56337	0.390111	1	6	0.000852515	0.166667	1	1	Not associated
GO Cellular Component	GO:0044433	cytoplasmic vesicle part	0.148117	1.1716	40.9696	48	0.0481995	0.0564706	0.251149	1.12853	31.0139	35	477	0.029838	0.0733753	1	1	Not associated
MSigDB Pathway	REACTOME_VIF_MEDIATED_DEGRADATION_OF_APOBEC3G	Genes involved in Vif-mediated degradation of APOBEC3G	0.148506	1.96839	2.03212	4	0.00239073	0.00470588	0.425568	1.20629	3.31595	4	51	0.00341006	0.0784314	1	1	Not associated
MSigDB Pathway	KEGG_COMPLEMENT_AND_COAGULATION_CASCADES	Complement and coagulation cascades	0.148536	1.69056	3.54912	6	0.00417543	0.00705882	0.66434	0.891607	4.48628	4	69	0.00341006	0.057971	1	1	Not associated
MSigDB Pathway	ST_JNK_MAPK_PATHWAY	JNK MAPK Pathway	0.148829	1.61189	4.34273	7	0.0051091	0.00823529	0.115672	1.92253	2.60074	5	40	0.00426258	0.125	1	1	Not associated
MSigDB Pathway	BIOCARTA_CBL_PATHWAY	CBL mediated ligand-induced downregulation of EGF receptors	0.148875	2.26185	1.32635	3	0.00156041	0.00352941	0.205441	2.36619	0.845241	2	13	0.00170503	0.153846	1	1	Not associated
GO Molecular Function	GO:0005088	Ras guanyl-nucleotide exchange factor activity	0.149066	1.34108	11.9307	16	0.0140361	0.0188235	0.145065	1.43375	7.67219	11	118	0.00937766	0.0932203	1	1	Not associated
GO Molecular Function	GO:0043495	protein anchor	0.150479	2.92076	0.684753	2	0.000805592	0.00235294	0.0712839	4.39435	0.45513	2	7	0.00170503	0.285714	1	1	Not associated
GO Cellular Component	GO:0031306	intrinsic to mitochondrial outer membrane	0.150931	2.91519	0.686061	2	0.000807131	0.00235294	0.279431	1.92253	1.0403	2	16	0.00170503	0.125	1	1	Not associated
GO Molecular Function	GO:0004029	aldehyde dehydrogenase (NAD) activity	0.151175	2.9122	0.686767	2	0.000807961	0.00235294	0.134391	3.07604	0.650186	2	10	0.00170503	0.2	1	1	Not associated
GO Molecular Function	GO:0035257	nuclear hormone receptor binding	0.151182	1.36919	10.225	14	0.0120295	0.0164706	0.32938	1.19226	8.38739	10	129	0.00852515	0.0775194	1	1	Not associated
GO Molecular Function	GO:0016776	phosphotransferase activity, phosphate group as acceptor	0.151246	1.78887	2.79505	5	0.0032883	0.00588235	0.26098	1.53802	2.60074	4	40	0.00341006	0.1	1	1	Not associated
GO Cellular Component	GO:0070013	intracellular organelle lumen	0.153274	1.06916	185.191	198	0.217872	0.232941	0.610366	0.983419	174.9	172	2690	0.146633	0.0639405	1	1	Not associated
GO Cellular Component	GO:0031252	cell leading edge	0.153439	1.20337	29.0849	35	0.0342176	0.0411765	0.00731169	1.60211	18.7253	30	288	0.0255754	0.104167	1	1	Not associated
MSigDB Pathway	KEGG_PROGESTERONE_MEDIATED_OOCYTE_MATURATION	Progesterone-mediated oocyte maturation	0.154072	1.40444	8.54435	12	0.0100522	0.0141177	0.105854	1.60956	5.5916	9	86	0.00767263	0.104651	1	1	Not associated
MSigDB Pathway	REACTOME_APC_C_CDC20_MEDIATED_DEGRADATION_OF_MITOTIC_PROTEINS	Genes involved in APC/C:Cdc20 mediated degradation of mitotic proteins	0.154533	1.66983	3.59317	6	0.00422726	0.00705882	0.268741	1.37733	4.35624	6	67	0.00511509	0.0895522	1	1	Not associated
PANTHER Pathway	P00005	Angiogenesis	0.154711	1.27851	16.4254	21	0.019324	0.0247059	0.0366834	1.62969	9.8178	16	151	0.0136402	0.10596	1	1	Not associated
MSigDB Pathway	BIOCARTA_CREB_PATHWAY	Transcription factor CREB and its extracellular signals	0.155259	1.77259	2.82074	5	0.00331851	0.00588235	0.25509	1.70891	1.7555	3	27	0.00255755	0.111111	1	1	Not associated
GO Cellular Component	GO:0005762	mitochondrial large ribosomal subunit	0.155323	2.86231	0.698737	2	0.000822043	0.00235294	0.635356	1.02535	0.975279	1	15	0.000852515	0.0666667	1	1	Not associated
MSigDB Pathway	REACTOME_METABOLISM_OF_NUCLEOTIDES	Genes involved in Metabolism of nucleotides	0.15646	1.53323	5.21775	8	0.00613853	0.00941177	0.0947394	1.70891	4.68134	8	72	0.00682012	0.111111	1	1	Not associated
MSigDB Pathway	PID_ERBB2ERBB3PATHWAY	ErbB2/ErbB3 signaling events	0.156807	1.6622	3.60968	6	0.00424668	0.00705882	0.0696716	2.0507	2.92584	6	45	0.00511509	0.133333	1	1	Not associated
MSigDB Pathway	PID_NFKAPPABATYPICALPATHWAY	Atypical NF-kappaB pathway	0.156873	2.20538	1.36031	3	0.00160037	0.00352941	0.279431	1.92253	1.0403	2	16	0.00170503	0.125	1	1	Not associated
GO Molecular Function	GO:0034185	apolipoprotein binding	0.157309	2.2024	1.36215	3	0.00160253	0.00352941	0.279431	1.92253	1.0403	2	16	0.00170503	0.125	1	1	Not associated
GO Cellular Component	GO:0043679	axon terminus	0.157377	1.45204	6.88688	10	0.00810221	0.0117647	0.214196	1.48841	4.03115	6	62	0.00511509	0.0967742	1	1	Not associated
GO Molecular Function	GO:0003735	structural constituent of ribosome	0.157506	1.45176	6.8882	10	0.00810376	0.0117647	0.818921	0.773848	10.3379	8	159	0.00682012	0.0503145	1	1	Not associated
GO Cellular Component	GO:0001891	phagocytic cup	0.158419	2.82633	0.707631	2	0.000832507	0.00235294	0.229975	2.19718	0.91026	2	14	0.00170503	0.142857	1	1	Not associated
GO Cellular Component	GO:0000151	ubiquitin ligase complex	0.159044	1.33996	11.1944	15	0.0131699	0.0176471	0.262464	1.22664	10.598	13	163	0.0110827	0.0797546	1	1	Not associated
MSigDB Pathway	REACTOME_PERK_REGULATED_GENE_EXPRESSION	Genes involved in PERK regulated gene expression	0.159425	2.18813	1.37103	3	0.00161298	0.00352941	0.25509	1.70891	1.7555	3	27	0.00255755	0.111111	1	1	Not associated
GO Molecular Function	GO:0003677	DNA binding	0.159504	1.06761	184.524	197	0.217088	0.231765	0.40168	1.02061	154.809	158	2381	0.134697	0.0663587	1	1	Not associated
GO Molecular Function	GO:0005068	transmembrane receptor protein tyrosine kinase adaptor activity	0.159916	2.18486	1.37309	3	0.0016154	0.00352941	0.454033	1.70891	0.585167	1	9	0.000852515	0.111111	1	1	Not associated
GO Molecular Function	GO:0009881	photoreceptor activity	0.16079	2.79948	0.714418	2	0.000840492	0.00235294	0.68127	0.904719	1.10532	1	17	0.000852515	0.0588235	1	1	Not associated
GO Cellular Component	GO:0005869	dynactin complex	0.161044	5.69544	0.175579	1	0.000206564	0.00117647	0.112172	3.41783	0.585167	2	9	0.00170503	0.222222	1	1	Not associated
GO Molecular Function	GO:0015171	amino acid transmembrane transporter activity	0.16187	1.51943	5.26514	8	0.00619429	0.00941177	0.224796	1.46478	4.09617	6	63	0.00511509	0.0952381	1	1	Not associated
GO Cellular Component	GO:0031941	filamentous actin	0.161966	1.90084	2.10433	4	0.00247568	0.00470588	0.219712	1.84563	1.62546	3	25	0.00255755	0.12	1	1	Not associated
MSigDB Pathway	REACTOME_RESPIRATORY_ELECTRON_TRANSPORT	Genes involved in Respiratory electron transport	0.162018	1.64514	3.6471	6	0.00429071	0.00705882	0.543177	1.02535	4.87639	5	75	0.00426258	0.0666667	1	1	Not associated
GO Cellular Component	GO:0005796	Golgi lumen	0.162663	1.41247	7.78776	11	0.00916207	0.0129412	0.117646	1.57298	5.72163	9	88	0.00767263	0.102273	1	1	Not associated
GO Molecular Function	GO:0005520	insulin-like growth factor binding	0.163202	1.74169	2.87077	5	0.00337737	0.00588235	0.0756099	2.46083	1.62546	4	25	0.00341006	0.16	1	1	Not associated
MSigDB Pathway	PID_SHP2_PATHWAY	SHP2 signaling	0.163577	1.43895	6.94949	10	0.00817587	0.0117647	0.173693	1.59106	3.77108	6	58	0.00511509	0.103448	1	1	Not associated
GO Molecular Function	GO:0071889	14-3-3 protein binding	0.163888	2.15881	1.38966	3	0.00163489	0.00352941	0.279431	1.92253	1.0403	2	16	0.00170503	0.125	1	1	Not associated
MSigDB Pathway	REACTOME_MRNA_DECAY_BY_3_TO_5_EXORIBONUCLEASE	Genes involved in mRNA Decay by 3' to 5' Exoribonuclease	0.16411	5.57913	0.17924	1	0.00021087	0.00117647	0.522756	1.3982	0.715204	1	11	0.000852515	0.0909091	1	1	Not associated
GO Cellular Component	GO:0071203	WASH complex	0.164213	2.76172	0.724185	2	0.000851983	0.00235294	0.205441	2.36619	0.845241	2	13	0.00170503	0.153846	1	1	Not associated
GO Molecular Function	GO:0005085	guanyl-nucleotide exchange factor activity	0.164494	1.2665	16.5811	21	0.0195072	0.0247059	0.229537	1.24034	12.0935	15	186	0.0127877	0.0806452	1	1	Not associated
PANTHER Pathway	P05918	p38 MAPK pathway	0.164507	1.6372	3.6648	6	0.00431153	0.00705882	0.190478	1.75774	2.27565	4	35	0.00341006	0.114286	1	1	Not associated
GO Molecular Function	GO:0004867	serine-type endopeptidase inhibitor activity	0.164582	1.51268	5.28863	8	0.00622191	0.00941177	0.157061	1.47257	6.11174	9	94	0.00767263	0.0957447	1	1	Not associated
MSigDB Pathway	PID_FGF_PATHWAY	FGF signaling pathway	0.166124	1.46734	6.13354	9	0.00721593	0.0105882	0.064392	1.95748	3.57602	7	55	0.0059676	0.127273	1	1	Not associated
GO Cellular Component	GO:0030120	vesicle coat	0.16638	1.7298	2.8905	5	0.00340059	0.00588235	0.134886	1.83098	2.73078	5	42	0.00426258	0.119048	1	1	Not associated
MSigDB Pathway	PID_PDGFRAPATHWAY	PDGFR-alpha signaling pathway	0.166879	1.87782	2.13013	4	0.00250604	0.00470588	0.423624	1.3982	1.43041	2	22	0.00170503	0.0909091	1	1	Not associated
MSigDB Pathway	KEGG_GLYCOSPHINGOLIPID_BIOSYNTHESIS_LACTO_AND_NEOLACTO_SERIES	Glycosphingolipid biosynthesis - lacto and neolacto series	0.166899	1.87773	2.13023	4	0.00250616	0.00470588	0.0756099	2.46083	1.62546	4	25	0.00341006	0.16	1	1	Not associated
GO Molecular Function	GO:0005328	neurotransmitter:sodium symporter activity	0.167507	2.13577	1.40464	3	0.00165252	0.00352941	0.35292	1.61897	1.23535	2	19	0.00170503	0.105263	1	1	Not associated
GO Molecular Function	GO:0016740	transferase activity	0.168768	1.07407	150.828	162	0.177445	0.190588	0.023115	1.17349	120.154	141	1848	0.120205	0.0762987	1	1	Not associated
MSigDB Pathway	KEGG_RNA_POLYMERASE	RNA polymerase	0.168976	2.71106	0.737718	2	0.000867903	0.00235294	0.589522	1.02535	1.95056	2	30	0.00170503	0.0666667	1	1	Not associated
MSigDB Pathway	REACTOME_APC_C_CDH1_MEDIATED_DEGRADATION_OF_CDC20_AND_OTHER_APC_C_CDH1_TARGETED_PROTEINS_IN_LATE_MITOSIS_EARLY_G1	Genes involved in APC/C:Cdh1 mediated degradation of Cdc20 and other APC/C:Cdh1 targeted proteins in late mitosis/early G1	0.169586	1.71806	2.91026	5	0.00342384	0.00588235	0.429805	1.16517	4.29123	5	66	0.00426258	0.0757576	1	1	Not associated
MSigDB Pathway	PID_AJDISS_2PATHWAY	Posttranslational regulation of adherens junction stability and dissassembly	0.17	1.45884	6.1693	9	0.00725799	0.0105882	0.0893741	1.92253	3.12089	6	48	0.00511509	0.125	1	1	Not associated
MSigDB Pathway	REACTOME_ORGANIC_CATION_ANION_ZWITTERION_TRANSPORT	Genes involved in Organic cation/anion/zwitterion transport	0.170124	2.69916	0.74097	2	0.000871729	0.00235294	0.205441	2.36619	0.845241	2	13	0.00170503	0.153846	1	1	Not associated
GO Molecular Function	GO:0005161	platelet-derived growth factor receptor binding	0.170303	2.1184	1.41616	3	0.00166607	0.00352941	0.609978	1.09859	0.91026	1	14	0.000852515	0.0714286	1	1	Not associated
MSigDB Pathway	REACTOME_PI_3K_CASCADE	Genes involved in PI-3K cascade	0.170495	1.49835	5.3392	8	0.00628141	0.00941177	0.273231	1.4241	3.511	5	54	0.00426258	0.0925926	1	1	Not associated
MSigDB Pathway	REACTOME_NA_CL_DEPENDENT_NEUROTRANSMITTER_TRANSPORTERS	Genes involved in Na+/Cl- dependent neurotransmitter transporters	0.17079	2.11541	1.41816	3	0.00166843	0.00352941	0.304116	1.80944	1.10532	2	17	0.00170503	0.117647	1	1	Not associated
MSigDB Pathway	REACTOME_PROCESSING_OF_CAPPED_INTRON_CONTAINING_PRE_MRNA	Genes involved in Processing of Capped Intron-Containing Pre-mRNA	0.170893	1.49741	5.34258	8	0.00628538	0.00941177	0.665715	0.904719	8.84253	8	136	0.00682012	0.0588235	1	1	Not associated
GO Molecular Function	GO:0030674	protein binding, bridging	0.171329	1.28531	14.0044	18	0.0164757	0.0211765	0.0802731	1.53802	8.45241	13	130	0.0110827	0.1	1	1	Not associated
MSigDB Pathway	BIOCARTA_BIOPEPTIDES_PATHWAY	Bioactive Peptide Induced Signaling Pathway	0.171684	1.7105	2.92312	5	0.00343896	0.00588235	0.134886	1.83098	2.73078	5	42	0.00426258	0.119048	1	1	Not associated
MSigDB Pathway	REACTOME_AUTODEGRADATION_OF_THE_E3_UBIQUITIN_LIGASE_COP1	Genes involved in Autodegradation of the E3 ubiquitin ligase COP1	0.171711	1.85594	2.15524	4	0.00253557	0.00470588	0.395717	1.25553	3.18591	4	49	0.00341006	0.0816327	1	1	Not associated
MSigDB Pathway	REACTOME_RNA_POL_III_CHAIN_ELONGATION	Genes involved in RNA Polymerase III Chain Elongation	0.172228	2.67767	0.746919	2	0.000878729	0.00235294	0.304116	1.80944	1.10532	2	17	0.00170503	0.117647	1	1	Not associated
MSigDB Pathway	BIOCARTA_CARM_ER_PATHWAY	CARM1 and Regulation of the Estrogen Receptor	0.173259	1.54274	4.53738	7	0.00533809	0.00823529	0.217975	1.66273	2.40569	4	37	0.00341006	0.108108	1	1	Not associated
PANTHER Pathway	P04386	Histamine H2 receptor mediated signaling pathway	0.173851	1.84649	2.16628	4	0.00254856	0.00470588	0.468477	1.28168	1.56045	2	24	0.00170503	0.0833333	1	1	Not associated
MSigDB Pathway	REACTOME_TCR_SIGNALING	Genes involved in TCR signaling	0.174553	1.53937	4.54733	7	0.0053498	0.00823529	0.678637	0.870579	3.44598	3	53	0.00255755	0.0566038	1	1	Not associated
MSigDB Pathway	BIOCARTA_EXTRINSIC_PATHWAY	Extrinsic Prothrombin Activation Pathway	0.174668	2.65322	0.753802	2	0.000886826	0.00235294	0.205441	2.36619	0.845241	2	13	0.00170503	0.153846	1	1	Not associated
GO Cellular Component	GO:0005901	caveola	0.175912	1.41428	7.07072	10	0.0083185	0.0117647	0.0466958	1.98455	4.03115	8	62	0.00682012	0.129032	1	1	Not associated
GO Cellular Component	GO:0097342	ripoptosome	0.176316	5.15608	0.193946	1	0.000228171	0.00117647	0.331975	2.56337	0.390111	1	6	0.000852515	0.166667	1	1	Not associated
GO Cellular Component	GO:0017053	transcriptional repressor complex	0.176326	1.41349	7.07471	10	0.00832319	0.0117647	0.629529	0.932135	4.29123	4	66	0.00341006	0.0606061	1	1	Not associated
MSigDB Pathway	PID_ALPHASYNUCLEIN_PATHWAY	Alpha-synuclein signaling	0.176481	1.83505	2.17978	4	0.00256445	0.00470588	0.16419	1.86427	2.14561	4	33	0.00341006	0.121212	1	1	Not associated
MSigDB Pathway	REACTOME_MITOTIC_M_M_G1_PHASES	Genes involved in Mitotic M-M/G1 phases	0.176618	1.32841	10.5389	14	0.0123988	0.0164706	0.427243	1.08566	11.0532	12	170	0.0102302	0.0705882	1	1	Not associated
GO Molecular Function	GO:0043522	leucine zipper domain binding	0.177808	2.62247	0.762639	2	0.000897222	0.00235294	0.416048	1.92253	0.520149	1	8	0.000852515	0.125	1	1	Not associated
PANTHER Pathway	P00003	Alzheimer disease-amyloid secretase pathway	0.177879	1.44211	6.24085	9	0.00734217	0.0105882	0.224796	1.46478	4.09617	6	63	0.00511509	0.0952381	1	1	Not associated
MSigDB Pathway	BIOCARTA_SRCRPTP_PATHWAY	Activation of Src by Protein-tyrosine phosphatase alpha	0.178907	2.6119	0.765727	2	0.000900855	0.00235294	0.522756	1.3982	0.715204	1	11	0.000852515	0.0909091	1	1	Not associated
GO Molecular Function	GO:0004033	aldo-keto reductase (NADP) activity	0.179085	2.61019	0.766227	2	0.000901443	0.00235294	0.32864	1.70891	1.17033	2	18	0.00170503	0.111111	1	1	Not associated
MSigDB Pathway	REACTOME_POST_TRANSLATIONAL_PROTEIN_MODIFICATION	Genes involved in Post-translational protein modification	0.180207	1.24844	16.821	21	0.0197895	0.0247059	0.0520455	1.51281	11.8984	18	183	0.0153453	0.0983607	1	1	Not associated
GO Cellular Component	GO:0014069	postsynaptic density	0.180313	1.24832	16.8226	21	0.0197913	0.0247059	0.00500809	2.0973	7.15204	15	110	0.0127877	0.136364	1	1	Not associated
GO Molecular Function	GO:0016893	endonuclease activity, active with either ribo- or deoxyribonucleic acids and producing 5'-phosphomonoesters	0.180449	2.05831	1.45751	3	0.00171471	0.00352941	0.435402	1.24704	2.40569	3	37	0.00255755	0.0810811	1	1	Not associated
MSigDB Pathway	PID_IL12_2PATHWAY	IL12-mediated signaling events	0.180518	1.52412	4.59282	7	0.00540331	0.00823529	0.224796	1.46478	4.09617	6	63	0.00511509	0.0952381	1	1	Not associated
GO Molecular Function	GO:0004126	cytidine deaminase activity	0.180596	5.02123	0.199154	1	0.000234299	0.00117647	0.416048	1.92253	0.520149	1	8	0.000852515	0.125	1	1	Not associated
MSigDB Pathway	KEGG_AMYOTROPHIC_LATERAL_SCLEROSIS_ALS	Amyotrophic lateral sclerosis (ALS)	0.18061	1.52389	4.59352	7	0.00540414	0.00823529	0.248102	1.47887	3.38097	5	52	0.00426258	0.0961538	1	1	Not associated
GO Molecular Function	GO:0015645	fatty acid ligase activity	0.18155	2.58685	0.773139	2	0.000909576	0.00235294	0.229975	2.19718	0.91026	2	14	0.00170503	0.142857	1	1	Not associated
GO Molecular Function	GO:0033613	activating transcription factor binding	0.181649	1.40336	7.12573	10	0.00838321	0.0117647	0.119835	1.77464	3.38097	6	52	0.00511509	0.115385	1	1	Not associated
MSigDB Pathway	PID_SYNDECAN_2_PATHWAY	Syndecan-2-mediated signaling events	0.181707	1.67577	2.9837	5	0.00351024	0.00588235	0.0601009	2.33034	2.14561	5	33	0.00426258	0.151515	1	1	Not associated
MSigDB Pathway	REACTOME_POST_TRANSLATIONAL_MODIFICATION_SYNTHESIS_OF_GPI_ANCHORED_PROTEINS	Genes involved in Post-translational modification: synthesis of GPI-anchored proteins	0.182532	2.04651	1.46591	3	0.0017246	0.00352941	0.511178	1.18309	1.69048	2	26	0.00170503	0.0769231	1	1	Not associated
MSigDB Pathway	REACTOME_PURINE_SALVAGE	Genes involved in Purine salvage	0.182715	2.57598	0.776403	2	0.000913415	0.00235294	0.205441	2.36619	0.845241	2	13	0.00170503	0.153846	1	1	Not associated
MSigDB Pathway	BIOCARTA_EIF4_PATHWAY	Regulation of eIF4e and p70 S6 Kinase	0.182847	1.80816	2.21219	4	0.00260258	0.00470588	0.468477	1.28168	1.56045	2	24	0.00170503	0.0833333	1	1	Not associated
GO Molecular Function	GO:0048306	calcium-dependent protein binding	0.184015	1.57903	3.79979	6	0.00447034	0.00705882	0.125109	1.87564	2.66576	5	41	0.00426258	0.121951	1	1	Not associated
MSigDB Pathway	PID_DNAPK_PATHWAY	DNA-PK pathway in nonhomologous end joining	0.184962	2.5553	0.782686	2	0.000920807	0.00235294	0.279431	1.92253	1.0403	2	16	0.00170503	0.125	1	1	Not associated
GO Molecular Function	GO:0030295	protein kinase activator activity	0.185756	1.51115	4.63224	7	0.0054497	0.00823529	0.115672	1.92253	2.60074	5	40	0.00426258	0.125	1	1	Not associated
MSigDB Pathway	PID_P38_MK2PATHWAY	p38 signaling mediated by MAPKAP kinases	0.186751	2.02311	1.48287	3	0.00174455	0.00352941	0.152822	2.19718	1.36539	3	21	0.00255755	0.142857	1	1	Not associated
GO Cellular Component	GO:0005875	microtubule associated complex	0.186961	1.31332	10.66	14	0.0125412	0.0164706	0.390979	1.1309	8.84253	10	136	0.00852515	0.0735294	1	1	Not associated
GO Molecular Function	GO:0044183	protein binding involved in protein folding	0.187176	4.8259	0.207215	1	0.000243783	0.00117647	0.331975	2.56337	0.390111	1	6	0.000852515	0.166667	1	1	Not associated
PANTHER Pathway	P00031	Inflammation mediated by chemokine and cytokine signaling pathway	0.188234	1.26446	14.2353	18	0.0167474	0.0211765	0.116933	1.36892	12.4185	17	191	0.0144928	0.0890052	1	1	Not associated
GO Molecular Function	GO:0004889	acetylcholine-activated cation-selective channel activity	0.189835	2.51169	0.796275	2	0.000936794	0.00235294	0.279431	1.92253	1.0403	2	16	0.00170503	0.125	1	1	Not associated
MSigDB Pathway	REACTOME_HDL_MEDIATED_LIPID_TRANSPORT	Genes involved in HDL-mediated lipid transport	0.189906	2.51107	0.796473	2	0.000937027	0.00235294	0.659084	0.961264	1.0403	1	16	0.000852515	0.0625	1	1	Not associated
GO Molecular Function	GO:0004715	non-membrane spanning protein tyrosine kinase activity	0.190129	1.56214	3.84089	6	0.0045187	0.00705882	0.350542	1.33741	2.99085	4	46	0.00341006	0.0869565	1	1	Not associated
MSigDB Pathway	KEGG_FOCAL_ADHESION	Focal adhesion	0.191061	1.21766	19.7099	24	0.0231881	0.0282353	0.0349687	1.54575	12.9387	20	199	0.0170503	0.100502	1	1	Not associated
GO Cellular Component	GO:0005746	mitochondrial respiratory chain	0.191385	1.64418	3.04103	5	0.00357769	0.00588235	0.686272	0.866491	4.61632	4	71	0.00341006	0.056338	1	1	Not associated
MSigDB Pathway	PID_CMYB_PATHWAY	C-MYB transcription factor network	0.191614	1.32225	9.83175	13	0.0115668	0.0152941	0.0947611	1.64788	5.46156	9	84	0.00767263	0.107143	1	1	Not associated
GO Molecular Function	GO:0005099	Ras GTPase activator activity	0.19223	1.2803	12.4971	16	0.0147025	0.0188235	0.0183091	1.85623	7.54215	14	116	0.0119352	0.12069	1	1	Not associated
GO Cellular Component	GO:0001739	sex chromatin	0.192984	4.66451	0.214385	1	0.000252217	0.00117647	0.331975	2.56337	0.390111	1	6	0.000852515	0.166667	1	1	Not associated
GO Molecular Function	GO:0032561	guanyl ribonucleotide binding	0.19301	1.17405	28.9595	34	0.03407	0.04	0.310167	1.10991	25.2272	28	388	0.0238704	0.072165	1	1	Not associated
GO Cellular Component	GO:0071564	npBAF complex	0.193285	2.4818	0.805865	2	0.000948077	0.00235294	0.522756	1.3982	0.715204	1	11	0.000852515	0.0909091	1	1	Not associated
GO Molecular Function	GO:0005337	nucleoside transmembrane transporter activity	0.193306	2.48162	0.805926	2	0.000948148	0.00235294	0.553804	1.28168	0.780223	1	12	0.000852515	0.0833333	1	1	Not associated
MSigDB Pathway	KEGG_TIGHT_JUNCTION	Tight junction	0.193708	1.29041	11.6242	15	0.0136756	0.0176471	0.232287	1.29147	8.51743	11	131	0.00937766	0.0839695	1	1	Not associated
MSigDB Pathway	BIOCARTA_VITCB_PATHWAY	Vitamin C in the Brain	0.194523	2.47126	0.809304	2	0.000952122	0.00235294	0.157476	2.7964	0.715204	2	11	0.00170503	0.181818	1	1	Not associated
GO Molecular Function	GO:0030695	GTPase regulator activity	0.194908	1.14005	42.1034	48	0.0495334	0.0564706	0.0484943	1.31541	29.6485	39	456	0.0332481	0.0855263	1	1	Not associated
MSigDB Pathway	KEGG_DORSO_VENTRAL_AXIS_FORMATION	Dorso-ventral axis formation	0.195573	1.75756	2.27589	4	0.00267751	0.00470588	0.468477	1.28168	1.56045	2	24	0.00170503	0.0833333	1	1	Not associated
GO Molecular Function	GO:0008373	sialyltransferase activity	0.195585	1.63101	3.06559	5	0.00360657	0.00588235	0.0373358	3.07604	1.30037	4	20	0.00341006	0.2	1	1	Not associated
GO Molecular Function	GO:0008270	zinc ion binding	0.196156	1.08673	96.6203	105	0.113671	0.123529	0.0360076	1.20097	77.4371	93	1191	0.0792839	0.0780856	1	1	Not associated
MSigDB Pathway	REACTOME_P75NTR_RECRUITS_SIGNALLING_COMPLEXES	Genes involved in p75NTR recruits signalling complexes	0.196302	2.45629	0.814237	2	0.000957926	0.00235294	0.157476	2.7964	0.715204	2	11	0.00170503	0.181818	1	1	Not associated
GO Molecular Function	GO:0017049	GTP-Rho binding	0.196507	4.57125	0.218759	1	0.000257363	0.00117647	0.416048	1.92253	0.520149	1	8	0.000852515	0.125	1	1	Not associated
GO Cellular Component	GO:0005834	heterotrimeric G-protein complex	0.196632	1.62777	3.07168	5	0.00361374	0.00588235	0.20409	1.70891	2.34067	4	36	0.00341006	0.111111	1	1	Not associated
MSigDB Pathway	REACTOME_ELONGATION_ARREST_AND_RECOVERY	Genes involved in Elongation arrest and recovery	0.19671	2.45288	0.815367	2	0.000959255	0.00235294	0.875802	0.496136	2.01558	1	31	0.000852515	0.0322581	1	1	Not associated
MSigDB Pathway	KEGG_FRUCTOSE_AND_MANNOSE_METABOLISM	Fructose and mannose metabolism	0.197591	1.74988	2.28587	4	0.00268926	0.00470588	0.177168	1.80944	2.21063	4	34	0.00341006	0.117647	1	1	Not associated
GO Cellular Component	GO:0005753	mitochondrial proton-transporting ATP synthase complex	0.198185	2.44065	0.819453	2	0.000964063	0.00235294	0.446306	1.33741	1.49543	2	23	0.00170503	0.0869565	1	1	Not associated
MSigDB Pathway	BIOCARTA_BCR_PATHWAY	BCR Signaling Pathway	0.199322	1.61955	3.08728	5	0.00363209	0.00588235	0.0668579	2.2618	2.21063	5	34	0.00426258	0.147059	1	1	Not associated
MSigDB Pathway	REACTOME_ACETYLCHOLINE_BINDING_AND_DOWNSTREAM_EVENTS	Genes involved in Acetylcholine Binding And Downstream Events	0.19959	2.42914	0.823338	2	0.000968633	0.00235294	0.25468	2.0507	0.975279	2	15	0.00170503	0.133333	1	1	Not associated
GO Molecular Function	GO:0005528	FK506 binding	0.199721	2.42806	0.823702	2	0.000969061	0.00235294	0.635356	1.02535	0.975279	1	15	0.000852515	0.0666667	1	1	Not associated
PANTHER Pathway	P00024	Glycolysis	0.199752	4.48824	0.222805	1	0.000262123	0.00117647	0.331975	2.56337	0.390111	1	6	0.000852515	0.166667	1	1	Not associated
MSigDB Pathway	REACTOME_NEGATIVE_REGULATORS_OF_RIG_I_MDA5_SIGNALING	Genes involved in Negative regulators of RIG-I/MDA5 signaling	0.201331	1.94717	1.5407	3	0.00181259	0.00352941	0.309355	1.53802	1.95056	3	30	0.00255755	0.1	1	1	Not associated
GO Molecular Function	GO:0001102	RNA polymerase II activating transcription factor binding	0.201552	1.47416	4.74845	7	0.00558642	0.00823529	0.190478	1.75774	2.27565	4	35	0.00341006	0.114286	1	1	Not associated
MSigDB Pathway	PID_GMCSF_PATHWAY	GMCSF-mediated signaling events	0.202388	1.61032	3.10497	5	0.00365291	0.00588235	0.0895341	2.07841	2.40569	5	37	0.00426258	0.135135	1	1	Not associated
GO Molecular Function	GO:0016279	protein-lysine N-methyltransferase activity	0.203036	1.52826	3.92603	6	0.00461886	0.00705882	0.188395	1.63619	3.05587	5	47	0.00426258	0.106383	1	1	Not associated
GO Molecular Function	GO:0017134	fibroblast growth factor binding	0.203579	1.72764	2.3153	4	0.00272388	0.00470588	0.400469	1.46478	1.36539	2	21	0.00170503	0.0952381	1	1	Not associated
GO Cellular Component	GO:0005694	chromosome	0.203693	1.12557	47.9757	54	0.056442	0.0635294	0.46398	1.02091	45.0579	46	693	0.0392157	0.0663781	1	1	Not associated
MSigDB Pathway	KEGG_PYRUVATE_METABOLISM	Pyruvate metabolism	0.203944	1.72631	2.31708	4	0.00272598	0.00470588	0.486975	1.15352	2.60074	3	40	0.00255755	0.075	1	1	Not associated
MSigDB Pathway	PID_TCR_PATHWAY	TCR signaling in na&amp;#xef;ve CD4+ T cells	0.204084	1.46851	4.76674	7	0.00560793	0.00823529	0.617424	0.946475	4.22621	4	65	0.00341006	0.0615385	1	1	Not associated
MSigDB Pathway	REACTOME_APC_CDC20_MEDIATED_DEGRADATION_OF_NEK2A	Genes involved in APC-Cdc20 mediated degradation of Nek2A	0.206353	1.9226	1.56039	3	0.00183575	0.00352941	0.152822	2.19718	1.36539	3	21	0.00255755	0.142857	1	1	Not associated
MSigDB Pathway	REACTOME_COMPLEMENT_CASCADE	Genes involved in Complement cascade	0.207072	1.91915	1.56319	3	0.00183905	0.00352941	0.857896	0.530353	1.88554	1	29	0.000852515	0.0344828	1	1	Not associated
MSigDB Pathway	REACTOME_RAP1_SIGNALLING	Genes involved in Rap1 signalling	0.207461	1.91729	1.56471	3	0.00184084	0.00352941	0.279431	1.92253	1.0403	2	16	0.00170503	0.125	1	1	Not associated
GO Cellular Component	GO:0045259	proton-transporting ATP synthase complex	0.207575	2.36582	0.845375	2	0.000994558	0.00235294	0.468477	1.28168	1.56045	2	24	0.00170503	0.0833333	1	1	Not associated
GO Cellular Component	GO:0030122	AP-2 adaptor complex	0.207902	2.36329	0.846276	2	0.000995619	0.00235294	0.0910495	3.84505	0.520149	2	8	0.00170503	0.25	1	1	Not associated
PANTHER Pathway	P00018	EGF receptor signaling pathway	0.2102	1.28195	10.9208	14	0.012848	0.0164706	0.0567946	1.66273	7.21706	12	111	0.0102302	0.108108	1	1	Not associated
GO Cellular Component	GO:0016234	inclusion body	0.213038	1.694	2.36127	4	0.00277796	0.00470588	0.275669	1.50051	2.66576	4	41	0.00341006	0.097561	1	1	Not associated
GO Cellular Component	GO:0032592	integral to mitochondrial membrane	0.213736	1.88783	1.58912	3	0.00186956	0.00352941	0.363936	1.3982	2.14561	3	33	0.00255755	0.0909091	1	1	Not associated
GO Cellular Component	GO:0032580	Golgi cisterna membrane	0.214007	1.37356	6.55234	9	0.00770863	0.0105882	0.468541	1.11451	4.48628	5	69	0.00426258	0.0724638	1	1	Not associated
MSigDB Pathway	PID_MET_PATHWAY	Signaling events mediated by Hepatocyte Growth Factor Receptor (c-Met)	0.215375	1.34507	7.43457	10	0.00874655	0.0117647	0.0747103	1.73028	5.20149	9	80	0.00767263	0.1125	1	1	Not associated
MSigDB Pathway	PID_P38GAMMADELTAPATHWAY	Signaling mediated by p38-gamma and p38-delta	0.216048	2.3024	0.86866	2	0.00102195	0.00235294	0.522756	1.3982	0.715204	1	11	0.000852515	0.0909091	1	1	Not associated
MSigDB Pathway	REACTOME_INHIBITION_OF_REPLICATION_INITIATION_OF_DAMAGED_DNA_BY_RB1_E2F1	Genes involved in Inhibition of replication initiation of damaged DNA by RB1/E2F1	0.216222	2.30113	0.869139	2	0.00102252	0.00235294	0.18122	2.56337	0.780223	2	12	0.00170503	0.166667	1	1	Not associated
GO Cellular Component	GO:0005744	mitochondrial inner membrane presequence translocase complex	0.218431	4.05818	0.246416	1	0.000289901	0.00117647	0.454033	1.70891	0.585167	1	9	0.000852515	0.111111	1	1	Not associated
GO Cellular Component	GO:0030141	secretory granule	0.219499	1.19176	20.1383	24	0.0236921	0.0282353	0.504293	1.01781	17.6851	18	272	0.0153453	0.0661765	1	1	Not associated
GO Cellular Component	GO:0005903	brush border	0.221916	1.43055	4.89321	7	0.00575672	0.00823529	0.203773	1.51281	3.96613	6	61	0.00511509	0.0983607	1	1	Not associated
GO Cellular Component	GO:0044445	cytosolic part	0.222395	1.26668	11.0525	14	0.0130029	0.0164706	0.641511	0.932135	12.8737	12	198	0.0102302	0.0606061	1	1	Not associated
GO Cellular Component	GO:0005871	kinesin complex	0.228461	1.41738	4.9387	7	0.00581023	0.00823529	0.678637	0.870579	3.44598	3	53	0.00255755	0.0566038	1	1	Not associated
GO Cellular Component	GO:0000015	phosphopyruvate hydratase complex	0.229459	3.83696	0.260623	1	0.000306615	0.00117647	0.331975	2.56337	0.390111	1	6	0.000852515	0.166667	1	1	Not associated
GO Cellular Component	GO:0000785	chromatin	0.230535	1.16588	24.0162	28	0.0282543	0.0329412	0.541363	0.995191	22.1063	22	340	0.0187553	0.0647059	1	1	Not associated
PANTHER Pathway	P04376	5HT4 type receptor mediated signaling pathway	0.230542	1.63607	2.44489	4	0.00287634	0.00470588	0.607588	0.992272	2.01558	2	31	0.00170503	0.0645161	1	1	Not associated
GO Cellular Component	GO:0005938	cell cortex	0.231019	1.18689	19.3783	23	0.022798	0.0270588	0.136024	1.32461	13.5889	18	209	0.0153453	0.0861244	1	1	Not associated
PANTHER Pathway	P00013	Cell cycle	0.232023	2.19214	0.912352	2	0.00107336	0.00235294	0.25468	2.0507	0.975279	2	15	0.00170503	0.133333	1	1	Not associated
GO Cellular Component	GO:0009898	cytoplasmic side of plasma membrane	0.234061	1.29652	8.48424	11	0.00998146	0.0129412	0.374475	1.17183	6.82695	8	105	0.00682012	0.0761905	1	1	Not associated
GO Cellular Component	GO:0045179	apical cortex	0.23425	3.74731	0.266858	1	0.000313951	0.00117647	0.375423	2.19718	0.45513	1	7	0.000852515	0.142857	1	1	Not associated
GO Cellular Component	GO:0000242	pericentriolar material	0.235955	1.79167	1.67442	3	0.00196991	0.00352941	0.0942905	2.71416	1.10532	3	17	0.00255755	0.176471	1	1	Not associated
GO Cellular Component	GO:0044427	chromosomal part	0.23682	1.11935	41.0954	46	0.0483475	0.0541177	0.615991	0.964522	38.361	37	590	0.0315431	0.0627119	1	1	Not associated
GO Cellular Component	GO:0031514	motile cilium	0.239656	1.22587	13.0519	16	0.0153552	0.0188235	0.781447	0.822472	12.1585	10	187	0.00852515	0.0534759	1	1	Not associated
GO Cellular Component	GO:0032584	growth cone membrane	0.239992	1.77541	1.68975	3	0.00198794	0.00352941	0.0712839	4.39435	0.45513	2	7	0.00170503	0.285714	1	1	Not associated
GO Cellular Component	GO:0043292	contractile fiber	0.240261	1.18416	18.5785	22	0.021857	0.0258823	0.0976258	1.39118	12.9387	18	199	0.0153453	0.0904523	1	1	Not associated
GO Cellular Component	GO:0030016	myofibril	0.241502	1.18851	17.6692	21	0.0207873	0.0247059	0.109097	1.38341	12.2885	17	189	0.0144928	0.0899471	1	1	Not associated
GO Cellular Component	GO:0030027	lamellipodium	0.242087	1.21484	13.9937	17	0.0164631	0.02	0.0619747	1.5717	8.90754	14	137	0.0119352	0.10219	1	1	Not associated
GO Cellular Component	GO:0071013	catalytic step 2 spliceosome	0.245775	1.43015	4.19537	6	0.00493573	0.00705882	0.408751	1.16812	5.13647	6	79	0.00511509	0.0759494	1	1	Not associated
PANTHER Pathway	P05911	Angiotensin II-stimulated signaling through G proteins and beta-arrestin	0.247782	1.58371	2.52571	4	0.00297142	0.00470588	0.190478	1.75774	2.27565	4	35	0.00341006	0.114286	1	1	Not associated
PANTHER Pathway	P05913	Enkephalin release	0.24852	1.48728	3.36185	5	0.00395512	0.00588235	0.363936	1.3982	2.14561	3	33	0.00255755	0.0909091	1	1	Not associated
GO Cellular Component	GO:0042382	paraspeckles	0.248646	3.49857	0.285831	1	0.000336271	0.00117647	0.331975	2.56337	0.390111	1	6	0.000852515	0.166667	1	1	Not associated
GO Cellular Component	GO:0043197	dendritic spine	0.249656	1.21556	13.1627	16	0.0154855	0.0188235	0.0215176	1.99038	5.52658	11	85	0.00937766	0.129412	1	1	Not associated
GO Cellular Component	GO:0034706	sodium channel complex	0.250775	2.07597	0.963407	2	0.00113342	0.00235294	0.304116	1.80944	1.10532	2	17	0.00170503	0.117647	1	1	Not associated
GO Cellular Component	GO:0005923	tight junction	0.251606	1.23282	11.3561	14	0.0133601	0.0164706	0.157557	1.4374	6.95699	10	107	0.00852515	0.0934579	1	1	Not associated
PANTHER Pathway	P05915	Opioid proenkephalin pathway	0.252093	1.57127	2.54572	4	0.00299496	0.00470588	0.625042	0.961264	2.08059	2	32	0.00170503	0.0625	1	1	Not associated
GO Cellular Component	GO:0001527	microfibril	0.253371	2.06087	0.970464	2	0.00114172	0.00235294	0.112172	3.41783	0.585167	2	9	0.00170503	0.222222	1	1	Not associated
PANTHER Pathway	P00010	B cell activation	0.258034	1.3621	5.1391	7	0.00604601	0.00823529	0.0869712	1.82477	3.8361	7	59	0.0059676	0.118644	1	1	Not associated
GO Cellular Component	GO:0000803	sex chromosome	0.258427	2.0321	0.984204	2	0.00115789	0.00235294	0.376883	1.53802	1.30037	2	20	0.00170503	0.1	1	1	Not associated
GO Cellular Component	GO:0016580	Sin3 complex	0.258507	2.03165	0.984422	2	0.00115814	0.00235294	0.18122	2.56337	0.780223	2	12	0.00170503	0.166667	1	1	Not associated
GO Cellular Component	GO:0042588	zymogen granule	0.258937	2.02924	0.985589	2	0.00115952	0.00235294	0.18122	2.56337	0.780223	2	12	0.00170503	0.166667	1	1	Not associated
GO Cellular Component	GO:0019897	extrinsic to plasma membrane	0.259404	1.28045	7.80976	10	0.00918796	0.0117647	0.105854	1.60956	5.5916	9	86	0.00767263	0.104651	1	1	Not associated
GO Cellular Component	GO:0000788	nuclear nucleosome	0.260837	3.30925	0.302184	1	0.00035551	0.00117647	0.331975	2.56337	0.390111	1	6	0.000852515	0.166667	1	1	Not associated
PANTHER Pathway	P00021	FGF signaling pathway	0.261755	1.22182	11.4583	14	0.0134804	0.0164706	0.126353	1.50787	6.63189	10	102	0.00852515	0.0980392	1	1	Not associated
GO Cellular Component	GO:0035267	NuA4 histone acetyltransferase complex	0.269009	1.97443	1.01295	2	0.00119171	0.00235294	0.25468	2.0507	0.975279	2	15	0.00170503	0.133333	1	1	Not associated
GO Cellular Component	GO:0098533	ATPase dependent transmembrane transport complex	0.269227	1.97327	1.01355	2	0.00119241	0.00235294	0.32864	1.70891	1.17033	2	18	0.00170503	0.111111	1	1	Not associated
GO Cellular Component	GO:1990204	oxidoreductase complex	0.269486	1.38294	4.33858	6	0.00510421	0.00705882	0.655118	0.904719	5.52658	5	85	0.00426258	0.0588235	1	1	Not associated
GO Cellular Component	GO:0031513	nonmotile primary cilium	0.2721	1.26363	7.91369	10	0.00931022	0.0117647	0.295464	1.26847	6.3068	8	97	0.00682012	0.0824742	1	1	Not associated
GO Cellular Component	GO:0044306	neuron projection terminus	0.278525	1.25538	7.9657	10	0.00937141	0.0117647	0.291467	1.33741	4.48628	6	69	0.00511509	0.0869565	1	1	Not associated
GO Cellular Component	GO:0043189	H4/H2A histone acetyltransferase complex	0.278847	1.92365	1.03969	2	0.00122316	0.00235294	0.279431	1.92253	1.0403	2	16	0.00170503	0.125	1	1	Not associated
GO Cellular Component	GO:0044449	contractile fiber part	0.278908	1.16254	17.2037	20	0.0202397	0.0235294	0.122031	1.37477	11.6383	16	179	0.0136402	0.0893855	1	1	Not associated
GO Cellular Component	GO:0005856	cytoskeleton	0.279381	1.04674	147.123	154	0.173086	0.181176	0.267736	1.05478	122.3	129	1881	0.109974	0.0685805	1	1	Not associated
GO Cellular Component	GO:0060170	cilium membrane	0.280536	1.41539	3.53258	5	0.00415598	0.00588235	0.725691	0.809485	3.70606	3	57	0.00255755	0.0526316	1	1	Not associated
GO Cellular Component	GO:0019005	SCF ubiquitin ligase complex	0.286924	1.4787	2.70508	4	0.00318244	0.00470588	0.25509	1.70891	1.7555	3	27	0.00255755	0.111111	1	1	Not associated
GO Cellular Component	GO:0005929	cilium	0.287744	1.12629	24.8604	28	0.0292475	0.0329412	0.485296	1.02535	20.4809	21	315	0.0179028	0.0666667	1	1	Not associated
PANTHER Pathway	P00040	Metabotropic glutamate receptor group II pathway	0.289197	1.39742	3.57804	5	0.00420945	0.00588235	0.520055	1.09859	2.73078	3	42	0.00255755	0.0714286	1	1	Not associated
GO Cellular Component	GO:0044451	nucleoplasm part	0.291563	1.08525	47.9151	52	0.0563707	0.0611765	0.741707	0.91463	41.5469	38	639	0.0323956	0.0594679	1	1	Not associated
GO Cellular Component	GO:0000780	condensed nuclear chromosome, centromeric region	0.294967	1.84577	1.08356	2	0.00127478	0.00235294	0.609978	1.09859	0.91026	1	14	0.000852515	0.0714286	1	1	Not associated
GO Cellular Component	GO:0000123	histone acetyltransferase complex	0.295977	1.29947	5.38682	7	0.00633744	0.00823529	0.223671	1.4166	4.94141	7	76	0.0059676	0.0921053	1	1	Not associated
GO Cellular Component	GO:0034451	centriolar satellite	0.29681	2.84046	0.352055	1	0.000414183	0.00117647	0.454033	1.70891	0.585167	1	9	0.000852515	0.111111	1	1	Not associated
GO Cellular Component	GO:0005840	ribosome	0.296839	1.19548	10.8743	13	0.0127933	0.0152941	0.865204	0.758666	14.4991	11	223	0.00937766	0.0493273	1	1	Not associated
GO Cellular Component	GO:0031528	microvillus membrane	0.296943	1.57682	1.90257	3	0.00223831	0.00352941	0.279431	1.92253	1.0403	2	16	0.00170503	0.125	1	1	Not associated
GO Cellular Component	GO:0010494	cytoplasmic stress granule	0.297402	1.57541	1.90426	3	0.00224031	0.00352941	0.309355	1.53802	1.95056	3	30	0.00255755	0.1	1	1	Not associated
GO Cellular Component	GO:0000506	glycosylphosphatidylinositol-N-acetylglucosaminyltransferase (GPI-GnT) complex	0.302283	2.77882	0.359865	1	0.000423371	0.00117647	0.416048	1.92253	0.520149	1	8	0.000852515	0.125	1	1	Not associated
GO Cellular Component	GO:0031105	septin complex	0.30233	1.81218	1.10364	2	0.00129841	0.00235294	0.609978	1.09859	0.91026	1	14	0.000852515	0.0714286	1	1	Not associated
PANTHER Pathway	P00019	Endothelin signaling pathway	0.310339	1.20332	9.14137	11	0.0107545	0.0129412	0.195423	1.47482	4.74636	7	73	0.0059676	0.0958904	1	1	Not associated
GO Cellular Component	GO:0005666	DNA-directed RNA polymerase III complex	0.310549	2.68978	0.371778	1	0.000437386	0.00117647	0.609978	1.09859	0.91026	1	14	0.000852515	0.0714286	1	1	Not associated
GO Cellular Component	GO:0031461	cullin-RING ubiquitin ligase complex	0.312046	1.23079	7.31238	9	0.0086028	0.0105882	0.324728	1.23042	6.50186	8	100	0.00682012	0.08	1	1	Not associated
GO Cellular Component	GO:0015630	microtubule cytoskeleton	0.313765	1.05985	72.6518	77	0.0854727	0.0905882	0.292855	1.07265	60.5973	65	932	0.0554135	0.0697425	1	1	Not associated
GO Cellular Component	GO:0000421	autophagic vacuole membrane	0.314511	1.75908	1.13696	2	0.0013376	0.00235294	0.73954	0.769011	1.30037	1	20	0.000852515	0.05	1	1	Not associated
GO Cellular Component	GO:0031264	death-inducing signaling complex	0.317927	2.61416	0.382532	1	0.000450037	0.00117647	0.375423	2.19718	0.45513	1	7	0.000852515	0.142857	1	1	Not associated
PANTHER Pathway	P04395	Vasopressin synthesis	0.319937	1.73636	1.15184	2	0.0013551	0.00235294	0.522756	1.3982	0.715204	1	11	0.000852515	0.0909091	1	1	Not associated
GO Cellular Component	GO:0031235	intrinsic to cytoplasmic side of plasma membrane	0.322805	1.72456	1.15971	2	0.00136437	0.00235294	0.229975	2.19718	0.91026	2	14	0.00170503	0.142857	1	1	Not associated
PANTHER Pathway	P00044	Nicotinic acetylcholine receptor signaling pathway	0.330477	1.22625	6.52394	8	0.00767523	0.00941177	0.368923	1.19624	5.85167	7	90	0.0059676	0.0777778	1	1	Not associated
GO Cellular Component	GO:0044441	cilium part	0.33518	1.1585	11.2214	13	0.0132017	0.0152941	0.880058	0.699101	10.0129	7	154	0.0059676	0.0454546	1	1	Not associated
GO Cellular Component	GO:0033267	axon part	0.340634	1.12435	16.0093	18	0.0188344	0.0211765	0.0946202	1.52531	7.86725	12	121	0.0102302	0.0991735	1	1	Not associated
GO Cellular Component	GO:0019898	extrinsic to membrane	0.34245	1.13829	13.1776	15	0.0155031	0.0176471	0.0619747	1.5717	8.90754	14	137	0.0119352	0.10219	1	1	Not associated
GO Cellular Component	GO:0031616	spindle pole centrosome	0.342648	2.38418	0.419432	1	0.000493449	0.00117647	0.416048	1.92253	0.520149	1	8	0.000852515	0.125	1	1	Not associated
GO Cellular Component	GO:0005761	mitochondrial ribosome	0.343331	1.44658	2.07386	3	0.00243984	0.00352941	0.874338	0.569638	3.511	2	54	0.00170503	0.037037	1	1	Not associated
GO Cellular Component	GO:0032587	ruffle membrane	0.343369	1.23091	5.68684	7	0.0066904	0.00823529	0.235563	1.4419	4.16119	6	64	0.00511509	0.09375	1	1	Not associated
GO Cellular Component	GO:0030017	sarcomere	0.343525	1.1222	16.0399	18	0.0188705	0.0211765	0.180646	1.31295	10.6631	14	164	0.0119352	0.0853658	1	1	Not associated
GO Cellular Component	GO:0005771	multivesicular body	0.347003	1.43717	2.08743	3	0.0024558	0.00352941	0.490109	1.23042	1.62546	2	25	0.00170503	0.08	1	1	Not associated
GO Cellular Component	GO:0030134	ER to Golgi transport vesicle	0.347653	1.43552	2.08983	3	0.00245863	0.00352941	0.730595	0.788729	2.53572	2	39	0.00170503	0.0512821	1	1	Not associated
GO Cellular Component	GO:0005892	acetylcholine-gated channel complex	0.347711	1.62799	1.22851	2	0.00144531	0.00235294	0.279431	1.92253	1.0403	2	16	0.00170503	0.125	1	1	Not associated
GO Cellular Component	GO:0030485	smooth muscle contractile fiber	0.348131	2.33751	0.427805	1	0.0005033	0.00117647	0.331975	2.56337	0.390111	1	6	0.000852515	0.166667	1	1	Not associated
GO Cellular Component	GO:0000792	heterochromatin	0.348865	1.25004	4.79983	6	0.00564686	0.00705882	0.193541	1.53802	3.90111	6	60	0.00511509	0.1	1	1	Not associated
GO Cellular Component	GO:0016323	basolateral plasma membrane	0.349892	1.11751	16.1072	18	0.0189497	0.0211765	0.0772607	1.47355	10.8581	16	167	0.0136402	0.0958084	1	1	Not associated
GO Cellular Component	GO:0031985	Golgi cisterna	0.352245	1.18344	7.60495	9	0.00894699	0.0105882	0.612493	0.949396	5.2665	5	81	0.00426258	0.0617284	1	1	Not associated
PANTHER Pathway	P00029	Huntington disease	0.352358	1.15077	10.4278	12	0.0122681	0.0141177	0.397557	1.13461	7.93227	9	122	0.00767263	0.0737705	1	1	Not associated
PANTHER Pathway	P02752	Mannose metabolism	0.352464	2.30165	0.43447	1	0.000511142	0.00117647	0.331975	2.56337	0.390111	1	6	0.000852515	0.166667	1	1	Not associated
GO Cellular Component	GO:0005681	spliceosomal complex	0.355781	1.15647	9.51175	11	0.0111903	0.0129412	0.418547	1.09859	10.0129	11	154	0.00937766	0.0714286	1	1	Not associated
GO Cellular Component	GO:0001669	acrosomal vesicle	0.356255	1.23916	4.84198	6	0.00569644	0.00705882	0.717236	0.831363	4.81137	4	74	0.00341006	0.054054	1	1	Not associated
GO Cellular Component	GO:0030667	secretory granule membrane	0.35652	1.23878	4.84349	6	0.00569822	0.00705882	0.512282	1.07931	3.70606	4	57	0.00341006	0.0701754	1	1	Not associated
GO Cellular Component	GO:0035861	site of double-strand break	0.357805	2.25862	0.442748	1	0.00052088	0.00117647	0.489548	1.53802	0.650186	1	10	0.000852515	0.1	1	1	Not associated
GO Cellular Component	GO:0030139	endocytic vesicle	0.360653	1.11382	15.2627	17	0.0179562	0.02	0.168918	1.30203	12.2885	16	189	0.0136402	0.0846561	1	1	Not associated
GO Cellular Component	GO:0016460	myosin II complex	0.360845	1.58086	1.26513	2	0.00148839	0.00235294	0.80102	0.640843	1.56045	1	24	0.000852515	0.0416667	1	1	Not associated
GO Cellular Component	GO:0030135	coated vesicle	0.361356	1.0887	22.9631	25	0.0270155	0.0294118	0.466946	1.04169	16.3197	17	251	0.0144928	0.0677291	1	1	Not associated
GO Cellular Component	GO:0035145	exon-exon junction complex	0.363634	2.21307	0.451861	1	0.000531601	0.00117647	0.68127	0.904719	1.10532	1	17	0.000852515	0.0588235	1	1	Not associated
GO Cellular Component	GO:0035869	ciliary transition zone	0.363849	1.57042	1.27354	2	0.00149829	0.00235294	0.68127	0.904719	1.10532	1	17	0.000852515	0.0588235	1	1	Not associated
GO Cellular Component	GO:0031984	organelle subcompartment	0.367318	1.16682	7.71329	9	0.00907446	0.0105882	0.644749	0.915489	5.46156	5	84	0.00426258	0.0595238	1	1	Not associated
PANTHER Pathway	P02771	Pyrimidine Metabolism	0.370342	1.54825	1.29178	2	0.00151975	0.00235294	0.489548	1.53802	0.650186	1	10	0.000852515	0.1	1	1	Not associated
GO Cellular Component	GO:0043209	myelin sheath	0.371238	1.29772	3.08232	4	0.00362626	0.00470588	0.190478	1.75774	2.27565	4	35	0.00341006	0.114286	1	1	Not associated
PANTHER Pathway	P00053	T cell activation	0.371639	1.16215	7.74425	9	0.00911089	0.0105882	0.408751	1.16812	5.13647	6	79	0.00511509	0.0759494	1	1	Not associated
GO Cellular Component	GO:0044815	DNA packaging complex	0.371837	1.2966	3.08499	4	0.0036294	0.00470588	0.923491	0.574962	6.95699	4	107	0.00341006	0.0373832	1	1	Not associated
GO Cellular Component	GO:0044391	ribosomal subunit	0.373207	1.19193	5.87282	7	0.0069092	0.00823529	0.948129	0.561322	8.90754	5	137	0.00426258	0.0364963	1	1	Not associated
GO Cellular Component	GO:0016363	nuclear matrix	0.373256	1.1491	8.70249	10	0.0102382	0.0117647	0.100219	1.62849	5.52658	9	85	0.00767263	0.105882	1	1	Not associated
PANTHER Pathway	P04385	Histamine H1 receptor mediated signaling pathway	0.373954	1.24556	4.01425	5	0.00472265	0.00588235	0.125109	1.87564	2.66576	5	41	0.00426258	0.121951	1	1	Not associated
GO Cellular Component	GO:0000790	nuclear chromatin	0.375368	1.1072	14.4509	16	0.017001	0.0188235	0.331293	1.16812	10.2729	12	158	0.0102302	0.0759494	1	1	Not associated
GO Cellular Component	GO:0071339	MLL1 complex	0.375678	1.53042	1.30683	2	0.00153745	0.00235294	0.551557	1.09859	1.82052	2	28	0.00170503	0.0714286	1	1	Not associated
GO Cellular Component	GO:0030132	clathrin coat of coated pit	0.379616	1.51749	1.31797	2	0.00155055	0.00235294	0.205441	2.36619	0.845241	2	13	0.00170503	0.153846	1	1	Not associated
GO Cellular Component	GO:0097223	sperm part	0.385762	1.17632	5.95077	7	0.00700091	0.00823529	0.694619	0.864057	5.78665	5	89	0.00426258	0.0561798	1	1	Not associated
PANTHER Pathway	P00022	General transcription by RNA polymerase I	0.386383	2.04816	0.488243	1	0.000574404	0.00117647	0.609978	1.09859	0.91026	1	14	0.000852515	0.0714286	1	1	Not associated
GO Cellular Component	GO:0070461	SAGA-type complex	0.386475	1.4954	1.33744	2	0.00157346	0.00235294	0.531665	1.13928	1.7555	2	27	0.00170503	0.0740741	1	1	Not associated
GO Cellular Component	GO:0030424	axon	0.386561	1.05525	37.9057	40	0.044595	0.0470588	0.0237952	1.509	17.2299	26	265	0.0221654	0.0981132	1	1	Not associated
PANTHER Pathway	P00023	General transcription regulation	0.388647	1.48851	1.34362	2	0.00158073	0.00235294	0.607588	0.992272	2.01558	2	31	0.00170503	0.0645161	1	1	Not associated
GO Cellular Component	GO:0031588	AMP-activated protein kinase complex	0.389254	2.02868	0.492932	1	0.00057992	0.00117647	0.454033	1.70891	0.585167	1	9	0.000852515	0.111111	1	1	Not associated
GO Cellular Component	GO:0000794	condensed nuclear chromosome	0.396616	1.21064	4.13006	5	0.00485889	0.00588235	0.707173	0.842752	4.74636	4	73	0.00341006	0.0547945	1	1	Not associated
GO Cellular Component	GO:0031464	Cul4A-RING ubiquitin ligase complex	0.398233	1.96954	0.507733	1	0.000597333	0.00117647	0.416048	1.92253	0.520149	1	8	0.000852515	0.125	1	1	Not associated
GO Cellular Component	GO:0043232	intracellular non-membrane-bounded organelle	0.401528	1.01589	230.34	234	0.270988	0.275294	0.820954	0.947684	216.317	205	3327	0.174766	0.0616171	1	1	Not associated
GO Cellular Component	GO:0045263	proton-transporting ATP synthase complex, coupling factor F(o)	0.402696	1.9411	0.515172	1	0.000606085	0.00117647	0.582835	1.18309	0.845241	1	13	0.000852515	0.0769231	1	1	Not associated
GO Cellular Component	GO:0043601	nuclear replisome	0.402759	1.44503	1.38406	2	0.0016283	0.00235294	0.35292	1.61897	1.23535	2	19	0.00170503	0.105263	1	1	Not associated
GO Cellular Component	GO:0042827	platelet dense granule	0.403462	1.93627	0.516456	1	0.000607595	0.00117647	0.331975	2.56337	0.390111	1	6	0.000852515	0.166667	1	1	Not associated
GO Cellular Component	GO:0000445	THO complex part of transcription export complex	0.408363	1.90585	0.524699	1	0.000617293	0.00117647	0.331975	2.56337	0.390111	1	6	0.000852515	0.166667	1	1	Not associated
PANTHER Pathway	P05726	2-arachidonoylglycerol biosynthesis	0.409701	1.89767	0.526962	1	0.000619955	0.00117647	0.331975	2.56337	0.390111	1	6	0.000852515	0.166667	1	1	Not associated
GO Cellular Component	GO:0030125	clathrin vesicle coat	0.410685	1.4215	1.40697	2	0.00165525	0.00235294	0.35292	1.61897	1.23535	2	19	0.00170503	0.105263	1	1	Not associated
GO Cellular Component	GO:0016324	apical plasma membrane	0.411572	1.0654	20.6495	22	0.0242935	0.0258823	0.0996442	1.36108	14.6942	20	226	0.0170503	0.0884956	1	1	Not associated
GO Cellular Component	GO:0043205	fibril	0.414316	1.41093	1.41751	2	0.00166766	0.00235294	0.205441	2.36619	0.845241	2	13	0.00170503	0.153846	1	1	Not associated
PANTHER Pathway	P00045	Notch signaling pathway	0.418248	1.21469	3.29303	4	0.00387416	0.00470588	0.688835	0.854457	2.34067	2	36	0.00170503	0.0555556	1	1	Not associated
PANTHER Pathway	P00050	Plasminogen activating cascade	0.419691	1.83817	0.544021	1	0.000640025	0.00117647	0.659084	0.961264	1.0403	1	16	0.000852515	0.0625	1	1	Not associated
GO Cellular Component	GO:0030897	HOPS complex	0.42113	1.82982	0.546501	1	0.000642943	0.00117647	0.553804	1.28168	0.780223	1	12	0.000852515	0.0833333	1	1	Not associated
PANTHER Pathway	P00051	TCA cycle	0.423026	1.81891	0.54978	1	0.0006468	0.00117647	0.331975	2.56337	0.390111	1	6	0.000852515	0.166667	1	1	Not associated
GO Cellular Component	GO:0005769	early endosome	0.424549	1.0638	17.8604	19	0.0210122	0.0223529	0.153513	1.29974	13.849	18	213	0.0153453	0.084507	1	1	Not associated
GO Cellular Component	GO:0030660	Golgi-associated vesicle membrane	0.427388	1.2561	2.38835	3	0.00280983	0.00352941	0.417773	1.28168	2.34067	3	36	0.00255755	0.0833333	1	1	Not associated
GO Cellular Component	GO:0042622	photoreceptor outer segment membrane	0.4294	1.78291	0.560881	1	0.00065986	0.00117647	0.659084	0.961264	1.0403	1	16	0.000852515	0.0625	1	1	Not associated
GO Cellular Component	GO:0005883	neurofilament	0.430251	1.36595	1.46418	2	0.00172257	0.00235294	0.112172	3.41783	0.585167	2	9	0.00170503	0.222222	1	1	Not associated
GO Cellular Component	GO:0072372	primary cilium	0.430988	1.08787	10.1115	11	0.0118959	0.0129412	0.397557	1.13461	7.93227	9	122	0.00767263	0.0737705	1	1	Not associated
GO Cellular Component	GO:0005819	spindle	0.43676	1.05242	19.9539	21	0.0234752	0.0247059	0.380888	1.09424	16.4497	18	253	0.0153453	0.0711462	1	1	Not associated
GO Cellular Component	GO:0000786	nucleosome	0.440513	1.2302	2.43863	3	0.00286897	0.00352941	0.963867	0.456838	6.56687	3	101	0.00255755	0.029703	1	1	Not associated
GO Cellular Component	GO:0005838	proteasome regulatory particle	0.442318	1.71301	0.583766	1	0.000686784	0.00117647	0.522756	1.3982	0.715204	1	11	0.000852515	0.0909091	1	1	Not associated
GO Cellular Component	GO:0032993	protein-DNA complex	0.44787	1.04932	18.107	19	0.0213023	0.0223529	0.84543	0.806831	19.8307	16	305	0.0136402	0.052459	1	1	Not associated
GO Cellular Component	GO:0071437	invadopodium	0.448741	1.67971	0.595342	1	0.000700403	0.00117647	0.331975	2.56337	0.390111	1	6	0.000852515	0.166667	1	1	Not associated
GO Cellular Component	GO:0043218	compact myelin	0.456493	1.29651	1.5426	2	0.00181483	0.00235294	0.25468	2.0507	0.975279	2	15	0.00170503	0.133333	1	1	Not associated
GO Cellular Component	GO:0000346	transcription export complex	0.457501	1.63573	0.611349	1	0.000719234	0.00117647	0.582835	1.18309	0.845241	1	13	0.000852515	0.0769231	1	1	Not associated
GO Cellular Component	GO:0000228	nuclear chromosome	0.460834	1.03296	25.1705	26	0.0296123	0.0305882	0.437179	1.05207	19.9607	21	307	0.0179028	0.0684039	1	1	Not associated
GO Cellular Component	GO:0016471	vacuolar proton-transporting V-type ATPase complex	0.464302	1.60268	0.623955	1	0.000734065	0.00117647	0.609978	1.09859	0.91026	1	14	0.000852515	0.0714286	1	1	Not associated
GO Cellular Component	GO:0071682	endocytic vesicle lumen	0.465626	1.59635	0.626429	1	0.000736975	0.00117647	0.68127	0.904719	1.10532	1	17	0.000852515	0.0588235	1	1	Not associated
GO Cellular Component	GO:0002102	podosome	0.466167	1.27222	1.57205	2	0.00184947	0.00235294	0.32864	1.70891	1.17033	2	18	0.00170503	0.111111	1	1	Not associated
GO Cellular Component	GO:0030119	AP-type membrane coat adaptor complex	0.466905	1.18057	2.54115	3	0.00298959	0.00352941	0.503657	1.12538	2.66576	3	41	0.00255755	0.0731707	1	1	Not associated
GO Cellular Component	GO:0005890	sodium:potassium-exchanging ATPase complex	0.468141	1.58443	0.631143	1	0.000742521	0.00117647	0.489548	1.53802	0.650186	1	10	0.000852515	0.1	1	1	Not associated
GO Cellular Component	GO:0070688	MLL5-L complex	0.470974	1.57114	0.636479	1	0.000748799	0.00117647	0.416048	1.92253	0.520149	1	8	0.000852515	0.125	1	1	Not associated
GO Cellular Component	GO:0000796	condensin complex	0.476183	1.54711	0.646367	1	0.000760431	0.00117647	0.331975	2.56337	0.390111	1	6	0.000852515	0.166667	1	1	Not associated
PANTHER Pathway	P00032	Insulin/IGF pathway-mitogen activated protein kinase kinase/MAP kinase cascade	0.478899	1.12008	3.57116	4	0.00420137	0.00470588	0.291173	1.59106	1.88554	3	29	0.00255755	0.103448	1	1	Not associated
GO Cellular Component	GO:0043296	apical junction complex	0.480277	1.03838	13.4826	14	0.0158619	0.0164706	0.278275	1.25042	7.99728	10	123	0.00852515	0.0813008	1	1	Not associated
PANTHER Pathway	P05912	Dopamine receptor mediated signaling pathway	0.482582	1.09262	4.57616	5	0.00538372	0.00588235	0.66598	0.88732	3.38097	3	52	0.00255755	0.0576923	1	1	Not associated
PANTHER Pathway	P04372	5-Hydroxytryptamine degredation	0.48371	1.2298	1.62629	2	0.00191328	0.00235294	0.32864	1.70891	1.17033	2	18	0.00170503	0.111111	1	1	Not associated
GO Cellular Component	GO:0044454	nuclear chromosome part	0.488343	1.02205	21.5253	22	0.0253238	0.0258823	0.552613	0.990393	17.1649	17	264	0.0144928	0.0643939	1	1	Not associated
GO Cellular Component	GO:0005778	peroxisomal membrane	0.48849	1.10615	3.61616	4	0.0042543	0.00470588	0.483974	1.11856	3.57602	4	55	0.00341006	0.0727273	1	1	Not associated
GO Cellular Component	GO:0043195	terminal bouton	0.494387	1.0977	3.64399	4	0.00428704	0.00470588	0.38201	1.35708	2.21063	3	34	0.00255755	0.0882353	1	1	Not associated
GO Cellular Component	GO:0042555	MCM complex	0.495559	1.46192	0.68403	1	0.000804741	0.00117647	0.522756	1.3982	0.715204	1	11	0.000852515	0.0909091	1	1	Not associated
GO Cellular Component	GO:0000784	nuclear chromosome, telomeric region	0.500103	1.19189	1.67801	2	0.00197413	0.00235294	0.490109	1.23042	1.62546	2	25	0.00170503	0.08	1	1	Not associated
GO Cellular Component	GO:0046658	anchored to plasma membrane	0.503734	1.08448	3.68839	4	0.00433928	0.00470588	0.417773	1.28168	2.34067	3	36	0.00255755	0.0833333	1	1	Not associated
GO Cellular Component	GO:0030894	replisome	0.507324	1.17569	1.70113	2	0.00200133	0.00235294	0.400469	1.46478	1.36539	2	21	0.00170503	0.0952381	1	1	Not associated
GO Cellular Component	GO:0030659	cytoplasmic vesicle membrane	0.508412	1.00646	34.7752	35	0.040912	0.0411765	0.58577	0.973432	25.6823	25	395	0.0213129	0.0632911	1	1	Not associated
GO Cellular Component	GO:0043186	P granule	0.512271	1.39336	0.717692	1	0.000844343	0.00117647	0.609978	1.09859	0.91026	1	14	0.000852515	0.0714286	1	1	Not associated
GO Cellular Component	GO:0005814	centriole	0.514134	1.04312	5.75199	6	0.00676705	0.00705882	0.468541	1.11451	4.48628	5	69	0.00426258	0.0724638	1	1	Not associated
PANTHER Pathway	P00043	Muscarinic acetylcholine receptor 2 and 4 signaling pathway	0.518205	1.04877	4.7675	5	0.00560882	0.00588235	0.678637	0.870579	3.44598	3	53	0.00255755	0.0566038	1	1	Not associated
GO Cellular Component	GO:0045111	intermediate filament cytoskeleton	0.518819	1.02226	8.804	9	0.0103576	0.0105882	0.972374	0.58903	15.2794	9	235	0.00767263	0.0382979	1	1	Not associated
GO Cellular Component	GO:0071778	WINAC complex	0.519037	1.36677	0.73165	1	0.000860765	0.00117647	0.331975	2.56337	0.390111	1	6	0.000852515	0.166667	1	1	Not associated
GO Cellular Component	GO:0031234	extrinsic to cytoplasmic side of plasma membrane	0.521788	1.04448	4.78705	5	0.00563183	0.00588235	0.483974	1.11856	3.57602	4	55	0.00341006	0.0727273	1	1	Not associated
GO Cellular Component	GO:0070419	nonhomologous end joining complex	0.522573	1.35314	0.739022	1	0.000869437	0.00117647	0.375423	2.19718	0.45513	1	7	0.000852515	0.142857	1	1	Not associated
GO Cellular Component	GO:0017119	Golgi transport complex	0.523444	1.3498	0.740848	1	0.000871586	0.00117647	0.553804	1.28168	0.780223	1	12	0.000852515	0.0833333	1	1	Not associated
GO Cellular Component	GO:0030904	retromer complex	0.525597	1.34161	0.745371	1	0.000876908	0.00117647	0.375423	2.19718	0.45513	1	7	0.000852515	0.142857	1	1	Not associated
GO Cellular Component	GO:0070776	MOZ/MORF histone acetyltransferase complex	0.526317	1.33889	0.746889	1	0.000878692	0.00117647	0.375423	2.19718	0.45513	1	7	0.000852515	0.142857	1	1	Not associated
GO Cellular Component	GO:0000783	nuclear telomere cap complex	0.526716	1.33738	0.747731	1	0.000879683	0.00117647	0.553804	1.28168	0.780223	1	12	0.000852515	0.0833333	1	1	Not associated
GO Cellular Component	GO:0008385	IkappaB kinase complex	0.528756	1.3297	0.752047	1	0.000884761	0.00117647	0.489548	1.53802	0.650186	1	10	0.000852515	0.1	1	1	Not associated
GO Cellular Component	GO:0032154	cleavage furrow	0.530824	1.07149	2.79984	3	0.00329394	0.00352941	0.743418	0.769011	2.60074	2	40	0.00170503	0.05	1	1	Not associated
GO Cellular Component	GO:0005680	anaphase-promoting complex	0.535985	1.30294	0.767493	1	0.000902932	0.00117647	0.756493	0.732391	1.36539	1	21	0.000852515	0.0476191	1	1	Not associated
GO Cellular Component	GO:0033276	transcription factor TFTC complex	0.537515	1.29737	0.770791	1	0.000906812	0.00117647	0.609978	1.09859	0.91026	1	14	0.000852515	0.0714286	1	1	Not associated
GO Cellular Component	GO:0042101	T cell receptor complex	0.540155	1.28781	0.776511	1	0.000913543	0.00117647	0.609978	1.09859	0.91026	1	14	0.000852515	0.0714286	1	1	Not associated
PANTHER Pathway	P02739	De novo pyrimidine deoxyribonucleotide biosynthesis	0.540536	1.28644	0.777339	1	0.000914516	0.00117647	0.553804	1.28168	0.780223	1	12	0.000852515	0.0833333	1	1	Not associated
GO Cellular Component	GO:0001750	photoreceptor outer segment	0.541641	1.02112	4.89659	5	0.00576069	0.00588235	0.498214	1.09859	3.64104	4	56	0.00341006	0.0714286	1	1	Not associated
GO Cellular Component	GO:0031902	late endosome membrane	0.541971	1.01345	5.92037	6	0.00696514	0.00705882	0.703993	0.854457	5.85167	5	90	0.00426258	0.0555556	1	1	Not associated
GO Cellular Component	GO:0032391	photoreceptor connecting cilium	0.542464	1.10071	1.81701	2	0.00213766	0.00235294	0.423624	1.3982	1.43041	2	22	0.00170503	0.0909091	1	1	Not associated
GO Cellular Component	GO:0005770	late endosome	0.543755	0.996722	12.0395	12	0.0141641	0.0141177	0.651837	0.920971	10.8581	10	167	0.00852515	0.0598802	1	1	Not associated
GO Cellular Component	GO:0012506	vesicle membrane	0.544867	0.991314	35.3067	35	0.0415372	0.0411765	0.636385	0.949396	26.3325	25	405	0.0213129	0.0617284	1	1	Not associated
GO Cellular Component	GO:0031904	endosome lumen	0.545611	1.26833	0.788436	1	0.000927572	0.00117647	0.522756	1.3982	0.715204	1	11	0.000852515	0.0909091	1	1	Not associated
GO Cellular Component	GO:0000793	condensed chromosome	0.545715	0.995309	12.0566	12	0.0141842	0.0141177	0.708341	0.87887	11.3782	10	175	0.00852515	0.0571429	1	1	Not associated
GO Cellular Component	GO:0042995	cell projection	0.547016	0.993568	135.874	135	0.159852	0.158824	0.00818911	1.25601	84.3941	106	1298	0.0903666	0.0816641	1	1	Not associated
GO Cellular Component	GO:0008290	F-actin capping protein complex	0.54924	1.25558	0.796447	1	0.000936996	0.00117647	0.416048	1.92253	0.520149	1	8	0.000852515	0.125	1	1	Not associated
PANTHER Pathway	P00052	TGF-beta signaling pathway	0.549649	0.994581	10.0545	10	0.0118288	0.0117647	0.0709849	1.69013	5.91669	10	91	0.00852515	0.10989	1	1	Not associated
GO Cellular Component	GO:0008023	transcription elongation factor complex	0.551481	1.08241	1.84773	2	0.0021738	0.00235294	0.883891	0.480632	2.08059	1	32	0.000852515	0.03125	1	1	Not associated
GO Cellular Component	GO:0031901	early endosome membrane	0.555324	0.993227	8.05456	8	0.00947595	0.00941177	0.336635	1.23749	5.65662	7	87	0.0059676	0.0804598	1	1	Not associated
GO Cellular Component	GO:0034399	nuclear periphery	0.559357	0.986935	10.1324	10	0.0119204	0.0117647	0.21807	1.35708	6.63189	9	102	0.00767263	0.0882353	1	1	Not associated
GO Cellular Component	GO:0016442	RISC complex	0.561508	1.21357	0.824014	1	0.000969429	0.00117647	0.416048	1.92253	0.520149	1	8	0.000852515	0.125	1	1	Not associated
GO Cellular Component	GO:0000775	chromosome, centromeric region	0.561836	0.98427	11.1758	11	0.013148	0.0129412	0.802615	0.788729	10.1429	8	156	0.00682012	0.0512821	1	1	Not associated
GO Cellular Component	GO:0045334	clathrin-coated endocytic vesicle	0.562246	1.02247	2.93407	3	0.00345184	0.00352941	0.363936	1.3982	2.14561	3	33	0.00255755	0.0909091	1	1	Not associated
GO Cellular Component	GO:0044295	axonal growth cone	0.562874	1.02152	2.9368	3	0.00345506	0.00352941	0.157476	2.7964	0.715204	2	11	0.00170503	0.181818	1	1	Not associated
GO Cellular Component	GO:0030117	membrane coat	0.564268	0.990349	6.05847	6	0.00712761	0.00705882	0.444019	1.12538	5.33152	6	82	0.00511509	0.0731707	1	1	Not associated
PANTHER Pathway	P04377	Beta1 adrenergic receptor signaling pathway	0.566932	1.00008	3.9997	4	0.00470553	0.00470588	0.778781	0.715359	2.7958	2	43	0.00170503	0.0465116	1	1	Not associated
GO Cellular Component	GO:0005795	Golgi stack	0.567265	0.980745	10.1963	10	0.0119957	0.0117647	0.743684	0.82394	7.28208	6	112	0.00511509	0.0535714	1	1	Not associated
PANTHER Pathway	P04378	Beta2 adrenergic receptor signaling pathway	0.572023	0.993596	4.02578	4	0.00473621	0.00470588	0.778781	0.715359	2.7958	2	43	0.00170503	0.0465116	1	1	Not associated
GO Cellular Component	GO:0000781	chromosome, telomeric region	0.577794	0.999127	3.00262	3	0.00353249	0.00352941	0.678637	0.870579	3.44598	3	53	0.00255755	0.0566038	1	1	Not associated
GO Cellular Component	GO:0001518	voltage-gated sodium channel complex	0.579165	1.15597	0.865073	1	0.00101773	0.00117647	0.609978	1.09859	0.91026	1	14	0.000852515	0.0714286	1	1	Not associated
GO Cellular Component	GO:0005801	cis-Golgi network	0.580026	1.02672	1.94796	2	0.00229171	0.00235294	0.570844	1.06071	1.88554	2	29	0.00170503	0.0689655	1	1	Not associated
GO Cellular Component	GO:0032426	stereocilium bundle tip	0.580071	1.1531	0.867228	1	0.00102027	0.00117647	0.416048	1.92253	0.520149	1	8	0.000852515	0.125	1	1	Not associated
GO Cellular Component	GO:0046581	intercellular canaliculus	0.580539	1.15162	0.868341	1	0.00102158	0.00117647	0.0910495	3.84505	0.520149	2	8	0.00170503	0.25	1	1	Not associated
GO Cellular Component	GO:0044297	cell body	0.583049	0.975124	33.8418	33	0.0398139	0.0388235	0.156146	1.24034	20.1558	25	310	0.0213129	0.0806452	1	1	Not associated
GO Cellular Component	GO:0097481	neuronal postsynaptic density	0.583538	1.14219	0.875509	1	0.00103001	0.00117647	0.416048	1.92253	0.520149	1	8	0.000852515	0.125	1	1	Not associated
GO Cellular Component	GO:0035748	myelin sheath abaxonal region	0.5847	1.13856	0.878301	1	0.0010333	0.00117647	0.375423	2.19718	0.45513	1	7	0.000852515	0.142857	1	1	Not associated
PANTHER Pathway	P00017	DNA replication	0.584948	1.13779	0.878897	1	0.001034	0.00117647	0.847998	0.549294	1.82052	1	28	0.000852515	0.0357143	1	1	Not associated
GO Cellular Component	GO:0031312	extrinsic to organelle membrane	0.585455	1.13621	0.880119	1	0.00103543	0.00117647	0.454033	1.70891	0.585167	1	9	0.000852515	0.111111	1	1	Not associated
GO Cellular Component	GO:0000178	exosome (RNase complex)	0.589506	1.12369	0.889928	1	0.00104697	0.00117647	0.73954	0.769011	1.30037	1	20	0.000852515	0.05	1	1	Not associated
PANTHER Pathway	P00026	Heterotrimeric G-protein signaling pathway-Gi alpha and Gs alpha mediated pathway	0.593988	0.963784	17.6388	17	0.0207516	0.02	0.183829	1.32412	9.8178	13	151	0.0110827	0.0860927	1	1	Not associated
GO Cellular Component	GO:0032585	multivesicular body membrane	0.594741	1.10773	0.90275	1	0.00106206	0.00117647	0.375423	2.19718	0.45513	1	7	0.000852515	0.142857	1	1	Not associated
GO Cellular Component	GO:0030014	CCR4-NOT complex	0.595503	1.10543	0.904629	1	0.00106427	0.00117647	0.635356	1.02535	0.975279	1	15	0.000852515	0.0666667	1	1	Not associated
PANTHER Pathway	P02775	Salvage pyrimidine ribonucleotides	0.60283	1.08355	0.92289	1	0.00108575	0.00117647	0.553804	1.28168	0.780223	1	12	0.000852515	0.0833333	1	1	Not associated
GO Cellular Component	GO:0044327	dendritic spine head	0.604108	1.07979	0.926108	1	0.00108954	0.00117647	0.454033	1.70891	0.585167	1	9	0.000852515	0.111111	1	1	Not associated
PANTHER Pathway	P00034	Integrin signalling pathway	0.606989	0.954539	15.7144	15	0.0184875	0.0176471	0.198205	1.28936	10.8581	14	167	0.0119352	0.0838323	1	1	Not associated
GO Cellular Component	GO:0005577	fibrinogen complex	0.607731	1.06918	0.935293	1	0.00110034	0.00117647	0.416048	1.92253	0.520149	1	8	0.000852515	0.125	1	1	Not associated
GO Cellular Component	GO:0045095	keratin filament	0.609165	1.06502	0.93895	1	0.00110465	0.00117647	0.998554	0.158559	6.3068	1	97	0.000852515	0.0103093	1	1	Not associated
GO Cellular Component	GO:0090533	cation-transporting ATPase complex	0.609829	1.06309	0.94065	1	0.00110665	0.00117647	0.553804	1.28168	0.780223	1	12	0.000852515	0.0833333	1	1	Not associated
GO Cellular Component	GO:0043202	lysosomal lumen	0.611561	0.942951	5.3025	5	0.00623823	0.00588235	0.707173	0.842752	4.74636	4	73	0.00341006	0.0547945	1	1	Not associated
GO Cellular Component	GO:0005720	nuclear heterochromatin	0.613853	0.964574	2.07345	2	0.00243936	0.00235294	0.511178	1.18309	1.69048	2	26	0.00170503	0.0769231	1	1	Not associated
PANTHER Pathway	P05730	Endogenous cannabinoid signaling	0.617552	0.958002	2.08768	2	0.00245609	0.00235294	0.423624	1.3982	1.43041	2	22	0.00170503	0.0909091	1	1	Not associated
GO Cellular Component	GO:0001673	male germ cell nucleus	0.62147	1.02997	0.970905	1	0.00114224	0.00117647	0.609978	1.09859	0.91026	1	14	0.000852515	0.0714286	1	1	Not associated
GO Cellular Component	GO:0030131	clathrin adaptor complex	0.623562	0.947413	2.11101	2	0.00248354	0.00235294	0.641887	0.932135	2.14561	2	33	0.00170503	0.0606061	1	1	Not associated
GO Cellular Component	GO:0030136	clathrin-coated vesicle	0.627854	0.945956	20.0855	19	0.02363	0.0223529	0.675218	0.909176	13.1988	12	203	0.0102302	0.0591133	1	1	Not associated
GO Cellular Component	GO:0000159	protein phosphatase type 2A complex	0.629525	0.937009	2.13445	2	0.00251112	0.00235294	0.73954	0.769011	1.30037	1	20	0.000852515	0.05	1	1	Not associated
GO Cellular Component	GO:0005775	vacuolar lumen	0.632764	0.920209	5.43355	5	0.00639241	0.00588235	0.754931	0.788729	5.07145	4	78	0.00341006	0.0512821	1	1	Not associated
GO Cellular Component	GO:0043220	Schmidt-Lanterman incisure	0.63557	0.991256	1.00882	1	0.00118685	0.00117647	0.522756	1.3982	0.715204	1	11	0.000852515	0.0909091	1	1	Not associated
GO Cellular Component	GO:0016604	nuclear body	0.638352	0.942273	22.2865	21	0.0262195	0.0247059	0.751175	0.874461	19.4406	17	299	0.0144928	0.0568562	1	1	Not associated
GO Cellular Component	GO:0005845	mRNA cap binding complex	0.640952	0.976866	1.02368	1	0.00120433	0.00117647	0.553804	1.28168	0.780223	1	12	0.000852515	0.0833333	1	1	Not associated
GO Cellular Component	GO:0043240	Fanconi anaemia nuclear complex	0.641906	0.974337	1.02634	1	0.00120746	0.00117647	0.553804	1.28168	0.780223	1	12	0.000852515	0.0833333	1	1	Not associated
GO Cellular Component	GO:0042584	chromaffin granule membrane	0.643157	0.97103	1.02984	1	0.00121157	0.00117647	0.331975	2.56337	0.390111	1	6	0.000852515	0.166667	1	1	Not associated
GO Cellular Component	GO:0034518	RNA cap binding complex	0.645208	0.965632	1.03559	1	0.00121834	0.00117647	0.582835	1.18309	0.845241	1	13	0.000852515	0.0769231	1	1	Not associated
GO Cellular Component	GO:0000118	histone deacetylase complex	0.645287	0.909986	6.59351	6	0.00775707	0.00705882	0.425568	1.20629	3.31595	4	51	0.00341006	0.0784314	1	1	Not associated
GO Cellular Component	GO:0030057	desmosome	0.647292	0.906583	2.20608	2	0.00259539	0.00235294	0.400469	1.46478	1.36539	2	21	0.00170503	0.0952381	1	1	Not associated
GO Cellular Component	GO:0022625	cytosolic large ribosomal subunit	0.647632	0.906009	2.20749	2	0.00259704	0.00235294	0.867545	0.580386	3.44598	2	53	0.00170503	0.0377359	1	1	Not associated
PANTHER Pathway	P00002	Alpha adrenergic receptor signaling pathway	0.650927	0.900457	2.22109	2	0.00261305	0.00235294	0.400469	1.46478	1.36539	2	21	0.00170503	0.0952381	1	1	Not associated
GO Cellular Component	GO:0005811	lipid particle	0.656434	0.891239	2.24407	2	0.00264008	0.00235294	0.860416	0.591547	3.38097	2	52	0.00170503	0.0384615	1	1	Not associated
GO Cellular Component	GO:0042583	chromaffin granule	0.657446	0.934011	1.07065	1	0.00125959	0.00117647	0.375423	2.19718	0.45513	1	7	0.000852515	0.142857	1	1	Not associated
PANTHER Pathway	P04373	5HT1 type receptor mediated signaling pathway	0.668097	0.877567	4.55806	4	0.00536242	0.00470588	0.778781	0.715359	2.7958	2	43	0.00170503	0.0465116	1	1	Not associated
GO Cellular Component	GO:0000152	nuclear ubiquitin ligase complex	0.668156	0.907132	1.10238	1	0.00129691	0.00117647	0.813975	0.615209	1.62546	1	25	0.000852515	0.04	1	1	Not associated
GO Cellular Component	GO:0008250	oligosaccharyltransferase complex	0.672309	0.8969	1.11495	1	0.00131171	0.00117647	0.489548	1.53802	0.650186	1	10	0.000852515	0.1	1	1	Not associated
PANTHER Pathway	P00041	Metabotropic glutamate receptor group I pathway	0.678036	0.859378	3.4909	3	0.00410694	0.00352941	0.80102	0.640843	1.56045	1	24	0.000852515	0.0416667	1	1	Not associated
GO Cellular Component	GO:0043034	costamere	0.680049	0.85249	2.34607	2	0.00276008	0.00235294	0.32864	1.70891	1.17033	2	18	0.00170503	0.111111	1	1	Not associated
GO Cellular Component	GO:0005905	coated pit	0.680967	0.862676	4.63674	4	0.00545498	0.00470588	0.539855	1.04273	3.8361	4	59	0.00341006	0.0677966	1	1	Not associated
GO Cellular Component	GO:0000779	condensed chromosome, centromeric region	0.681256	0.875402	6.854	6	0.00806353	0.00705882	0.844829	0.683565	5.85167	4	90	0.00341006	0.0444444	1	1	Not associated
GO Cellular Component	GO:0036126	sperm flagellum	0.68318	0.870591	1.14864	1	0.00135135	0.00117647	0.659084	0.961264	1.0403	1	16	0.000852515	0.0625	1	1	Not associated
GO Cellular Component	GO:0045177	apical part of cell	0.683919	0.924801	28.1142	26	0.0330755	0.0305882	0.1675	1.23453	19.4406	24	299	0.0204604	0.0802676	1	1	Not associated
PANTHER Pathway	P00057	Wnt signaling pathway	0.684697	0.930822	34.3782	32	0.040445	0.0376471	0.215516	1.19508	19.2455	23	296	0.0196078	0.0777027	1	1	Not associated
GO Cellular Component	GO:0043596	nuclear replication fork	0.696812	0.825672	2.42227	2	0.00284973	0.00235294	0.531665	1.13928	1.7555	2	27	0.00170503	0.0740741	1	1	Not associated
GO Cellular Component	GO:0030133	transport vesicle	0.699775	0.875094	10.2846	9	0.0120995	0.0105882	0.829114	0.752878	9.29766	7	143	0.0059676	0.0489511	1	1	Not associated
GO Cellular Component	GO:0032421	stereocilium bundle	0.700554	0.829813	3.61527	3	0.00425326	0.00352941	0.363936	1.3982	2.14561	3	33	0.00255755	0.0909091	1	1	Not associated
PANTHER Pathway	P04398	p53 pathway feedback loops 2	0.701145	0.839504	4.76472	4	0.00560555	0.00470588	0.567402	1.02535	2.92584	3	45	0.00255755	0.0666667	1	1	Not associated
GO Cellular Component	GO:0033017	sarcoplasmic reticulum membrane	0.701385	0.82873	3.62	3	0.00425882	0.00352941	0.65813	0.904719	2.21063	2	34	0.00170503	0.0588235	1	1	Not associated
GO Cellular Component	GO:0031256	leading edge membrane	0.702988	0.87713	11.4008	10	0.0134127	0.0117647	0.404601	1.13928	7.02201	8	108	0.00682012	0.0740741	1	1	Not associated
GO Cellular Component	GO:0005671	Ada2/Gcn5/Ada3 transcription activator complex	0.704769	0.820263	1.21912	1	0.00143426	0.00117647	0.659084	0.961264	1.0403	1	16	0.000852515	0.0625	1	1	Not associated
PANTHER Pathway	P00020	FAS signaling pathway	0.709079	0.806363	2.48027	2	0.00291797	0.00235294	0.607588	0.992272	2.01558	2	31	0.00170503	0.0645161	1	1	Not associated
PANTHER Pathway	P00028	Heterotrimeric G-protein signaling pathway-rod outer segment phototransduction	0.711823	0.802078	2.49352	2	0.00293356	0.00235294	0.688835	0.854457	2.34067	2	36	0.00170503	0.0555556	1	1	Not associated
PANTHER Pathway	P04391	Oxytocin receptor mediated signaling pathway	0.713556	0.82533	4.84654	4	0.00570182	0.00470588	0.469576	1.13928	3.511	4	54	0.00341006	0.0740741	1	1	Not associated
PANTHER Pathway	P04397	p53 pathway by glucose deprivation	0.730109	0.764101	1.30873	1	0.00153968	0.00117647	0.756493	0.732391	1.36539	1	21	0.000852515	0.0476191	1	1	Not associated
PANTHER Pathway	P04394	Thyrotropin-releasing hormone receptor signaling pathway	0.773529	0.756958	5.28431	4	0.00621684	0.00470588	0.483974	1.11856	3.57602	4	55	0.00341006	0.0727273	1	1	Not associated
PANTHER Pathway	P00033	Insulin/IGF pathway-protein kinase B signaling cascade	0.833027	0.658929	4.55285	3	0.00535629	0.00352941	0.65813	0.904719	2.21063	2	34	0.00170503	0.0588235	1	1	Not associated
PANTHER Pathway	P04374	5HT2 type receptor mediated signaling pathway	0.862939	0.650014	6.15372	4	0.00723967	0.00470588	0.579664	0.992272	4.03115	4	62	0.00341006	0.0645161	1	1	Not associated
PANTHER Pathway	P04380	Cortocotropin releasing factor receptor signaling pathway	0.874634	0.482163	2.07399	1	0.00243998	0.00117647	0.86715	0.512674	1.95056	1	30	0.000852515	0.0333333	1	1	Not associated
PANTHER Pathway	P00007	Axon guidance mediated by semaphorins	0.897984	0.438682	2.27956	1	0.00268183	0.00117647	0.721407	0.809485	1.23535	1	19	0.000852515	0.0526316	1	1	Not associated
PANTHER Pathway	P06587	Nicotine pharmacodynamics pathway	0.905192	0.425055	2.35264	1	0.00276781	0.00117647	0.857896	0.530353	1.88554	1	29	0.000852515	0.0344828	1	1	Not associated
PANTHER Pathway	P05734	Synaptic vesicle trafficking	0.920923	0.394703	2.53355	1	0.00298065	0.00117647	0.772344	0.699101	1.43041	1	22	0.000852515	0.0454546	1	1	Not associated
PANTHER Pathway	P00059	p53 pathway	0.931713	0.580113	8.61901	5	0.01014	0.00588235	0.754931	0.788729	5.07145	4	78	0.00341006	0.0512821	1	1	Not associated
PANTHER Pathway	P00042	Muscarinic acetylcholine receptor 1 and 3 signaling pathway	0.935915	0.505095	5.93948	3	0.00698762	0.00352941	0.702875	0.838921	3.57602	3	55	0.00255755	0.0545455	1	1	Not associated
PANTHER Pathway	P00004	Alzheimer disease-presenilin pathway	0.940292	0.609757	11.48	7	0.0135059	0.00823529	0.588556	0.969924	7.21706	7	111	0.0059676	0.0630631	1	1	Not associated
PANTHER Pathway	P04393	Ras Pathway	0.950304	0.477085	6.28819	3	0.00739787	0.00352941	0.834763	0.668705	4.48628	3	69	0.00255755	0.0434783	1	1	Not associated
PANTHER Pathway	P00039	Metabotropic glutamate receptor group III pathway	0.967401	0.478566	8.3583	4	0.00983329	0.00470588	0.918134	0.496136	4.03115	2	62	0.00170503	0.0322581	1	1	Not associated
PANTHER Pathway	P00030	Hypoxia response via HIF activation	0.96762	0.292115	3.42331	1	0.00402742	0.00117647	0.826087	0.591547	1.69048	1	26	0.000852515	0.0384615	1	1	Not associated
PANTHER Pathway	P00027	Heterotrimeric G-protein signaling pathway-Gq alpha and Go alpha mediated pathway	0.974684	0.539118	12.9842	7	0.0152755	0.00823529	0.569044	0.987721	7.08702	7	109	0.0059676	0.0642202	1	1	Not associated
PANTHER Pathway	P00008	Axon guidance mediated by Slit/Robo	0.978216	0.261918	3.81799	1	0.00449175	0.00117647	0.702013	0.854457	1.17033	1	18	0.000852515	0.0555556	1	1	Not associated
PANTHER Pathway	P00009	Axon guidance mediated by netrin	0.988223	0.225732	4.43002	1	0.00521179	0.00117647	0.86715	0.512674	1.95056	1	30	0.000852515	0.0333333	1	1	Not associated
PANTHER Pathway	P00037	Ionotropic glutamate receptor pathway	0.998899	0.147402	6.78418	1	0.00798139	0.00117647	0.94827	0.34955	2.86082	1	44	0.000852515	0.0227273	1	1	Not associated
PANTHER Pathway	P00012	Cadherin signaling pathway	0.999077	0.426268	21.1135	9	0.0248394	0.0105882	0.654343	0.916702	9.8178	9	151	0.00767263	0.0596027	1	1	Not associated

## Sheet: FDR<0.05_down
Ontology	ID	Description	BinomP	RegionFoldEnrich	ExpRegions	ObsRegions	GenomeFrac	SetCov	HyperP	GeneFoldEnrich	ExpGenes	ObsGenes	TotalGenes	GeneSetCov	TermCov	BinomP_bonferroni	HyperP_bonferroni	Significance_group
GO Biological Process	GO:0009611	response to wounding	4.55281e-10	1.75824	71.6626	126	0.0949174	0.166887	1.36978e-06	1.62707	59.0016	96	1008	0.0909091	0.0952381	7.81717e-07	0.00235191	Both
MSigDB Pathway	REACTOME_CIRCADIAN_CLOCK	Genes involved in Circadian Clock	2.12056e-09	4.33795	5.76309	25	0.00763324	0.0331126	1.10823e-06	4.59961	3.04373	14	52	0.0132576	0.269231	3.64101e-06	0.00190283	Both
GO Biological Process	GO:0042060	wound healing	1.73373e-08	1.87431	46.9506	88	0.0621862	0.116556	2.41431e-07	1.90136	35.7639	68	611	0.0643939	0.111293	2.97682e-05	0.000414537	Both
GO Biological Process	GO:0007596	blood coagulation	9.77066e-08	1.95583	36.3018	71	0.0480818	0.0940397	2.4595e-06	1.90962	29.3252	56	501	0.0530303	0.111776	0.000167762	0.00422297	Both
GO Biological Process	GO:0007599	hemostasis	1.18125e-07	1.9459	36.487	71	0.0483272	0.0940397	3.33709e-06	1.89075	29.6179	56	506	0.0530303	0.110672	0.00020282	0.00572977	Both
GO Biological Process	GO:0032268	regulation of cellular protein metabolic process	1.45548e-07	1.49625	104.929	157	0.138979	0.207947	2.44076e-05	1.44494	82.3564	119	1407	0.112689	0.0845771	0.000249907	0.0419078	Both
GO Biological Process	GO:0050878	regulation of body fluid levels	2.36473e-07	1.82554	43.8226	80	0.0580432	0.10596	2.10471e-05	1.72826	35.2956	61	603	0.0577652	0.101161	0.000406024	0.0361379	Both
MSigDB Pathway	REACTOME_HEMOSTASIS	Genes involved in Hemostasis	9.21164e-07	1.93581	32.0279	62	0.0424211	0.0821192	1.12531e-05	1.88985	26.4571	50	452	0.0473485	0.110619	0.00158164	0.0193216	Both
GO Biological Process	GO:0019222	regulation of metabolic process	7.26552e-06	1.16814	356.978	417	0.472818	0.552318	5.41001e-06	1.20259	322.636	388	5512	0.367424	0.0703919	0.0124749	0.00928899	Both
GO Biological Process	GO:0031323	regulation of cellular metabolic process	8.79307e-06	1.17824	332.698	392	0.44066	0.519205	2.67323e-05	1.20022	291.613	350	4982	0.331439	0.0702529	0.0150977	0.0458993	Both
MSigDB Pathway	PID_LYSOPHOSPHOLIPID_PATHWAY	LPA receptor mediated events	1.57069e-05	3.16799	5.99749	19	0.00794369	0.0251656	4.70263e-06	3.88279	3.8632	15	66	0.0142045	0.227273	0.0269687	0.00807442	Both
GO Molecular Function	GO:0002161	aminoacyl-tRNA editing activity	7.36462e-13	34.9603	0.286038	10	0.000378859	0.013245	0.0590546	4.88122	0.409733	2	7	0.00189394	0.285714	1.2645e-09	1	Binomial
GO Biological Process	GO:0006450	regulation of translational fidelity	9.79529e-13	33.9515	0.294538	10	0.000390117	0.013245	0.0937166	3.79651	0.5268	2	9	0.00189394	0.222222	1.68185e-09	1	Binomial
PANTHER Pathway	P00015	Circadian clock system	4.028e-12	23.2564	0.472988	11	0.000626475	0.0145695	0.0128699	5.69476	0.5268	3	9	0.00284091	0.333333	6.91607e-09	1	Binomial
MSigDB Pathway	KEGG_CIRCADIAN_RHYTHM_MAMMAL	Circadian rhythm - mammal	9.21329e-11	14.5147	0.82675	12	0.00109503	0.015894	0.00544991	5.2567	0.760933	4	13	0.00378788	0.307692	1.58192e-07	1	Binomial
GO Cellular Component	GO:0005829	cytosol	3.46291e-10	1.46109	157.417	230	0.208499	0.304636	0.000217393	1.26746	151.484	192	2588	0.181818	0.0741886	5.94581e-07	0.373264	Binomial
GO Cellular Component	GO:0044444	cytoplasmic part	2.29068e-09	1.20493	392.553	473	0.519938	0.62649	0.000196736	1.13442	411.665	467	7033	0.442235	0.0664012	3.9331e-06	0.337796	Binomial
GO Biological Process	GO:0097190	apoptotic signaling pathway	2.60048e-09	2.67238	17.5873	47	0.0232945	0.0622517	0.00122106	1.81105	16.5649	30	283	0.0284091	0.106007	4.46502e-06	1	Binomial
GO Cellular Component	GO:0044424	intracellular part	9.55615e-09	1.09691	605.336	664	0.80177	0.87947	0.0038228	1.05266	736.232	775	12578	0.733901	0.0616155	1.64079e-05	1	Binomial
GO Cellular Component	GO:0005622	intracellular	1.68995e-08	1.09379	608.892	666	0.806479	0.882119	0.00962578	1.04532	746.183	780	12748	0.738636	0.0611861	2.90164e-05	1	Binomial
MSigDB Pathway	KEGG_VALINE_LEUCINE_AND_ISOLEUCINE_BIOSYNTHESIS	Valine, leucine and isoleucine biosynthesis	1.82757e-08	10.3036	1.06759	11	0.00141402	0.0145695	0.0231576	4.65935	0.643867	3	11	0.00284091	0.272727	3.13794e-05	1	Binomial
GO Biological Process	GO:0006448	regulation of translational elongation	2.12237e-08	11.9162	0.839193	10	0.00111151	0.013245	0.262247	2.00991	0.995067	2	17	0.00189394	0.117647	3.64412e-05	1	Binomial
GO Biological Process	GO:0051246	regulation of protein metabolic process	5.55763e-08	1.47806	117.722	174	0.155923	0.230464	3.06313e-05	1.40681	93.829	132	1603	0.125	0.0823456	9.54245e-05	0.0525939	Binomial
GO Biological Process	GO:0006139	nucleobase-containing compound metabolic process	7.93786e-08	1.26419	266.574	337	0.353078	0.446358	0.00435701	1.13971	262.346	299	4482	0.283144	0.0667113	0.000136293	1	Binomial
GO Biological Process	GO:0044237	cellular metabolic process	1.25306e-07	1.15195	453.145	522	0.600192	0.691391	0.00596877	1.08307	481.964	522	8234	0.494318	0.0633957	0.00021515	1	Binomial
GO Biological Process	GO:0008152	metabolic process	1.83984e-07	1.13362	491.346	557	0.65079	0.737748	0.0203974	1.0608	538.273	571	9196	0.54072	0.0620922	0.0003159	1	Binomial
GO Biological Process	GO:0002376	immune system process	2.37078e-07	1.45697	115.994	169	0.153635	0.223841	0.00286516	1.26055	104.716	132	1789	0.125	0.0737842	0.000407062	1	Binomial
GO Molecular Function	GO:0005488	binding	2.51341e-07	1.0828	616.918	668	0.81711	0.884768	0.0013364	1.06233	712.585	757	12174	0.716856	0.0621817	0.000431553	1	Binomial
GO Biological Process	GO:0001956	positive regulation of neurotransmitter secretion	2.77739e-07	13.0544	0.612819	8	0.00081168	0.010596	0.00585738	7.32183	0.409733	3	7	0.00284091	0.428571	0.000476878	1	Binomial
GO Biological Process	GO:0043170	macromolecule metabolic process	3.2814e-07	1.17187	397.655	466	0.526696	0.617219	0.0358324	1.07076	396.915	425	6781	0.402462	0.0626751	0.000563416	1	Binomial
GO Biological Process	GO:0045087	innate immune response	4.25697e-07	1.79045	45.24	81	0.0599206	0.107285	0.00132074	1.47238	42.7879	63	731	0.0596591	0.0861833	0.000730922	1	Binomial
GO Biological Process	GO:0071704	organic substance metabolic process	4.41252e-07	1.1388	468.036	533	0.619915	0.70596	0.00889493	1.0755	501.163	539	8562	0.510417	0.0629526	0.000757629	1	Binomial
GO Cellular Component	GO:0043229	intracellular organelle	5.21846e-07	1.10264	558.66	616	0.739947	0.815894	0.0153897	1.05222	643.399	677	10992	0.641099	0.0615902	0.000896009	1	Binomial
GO Biological Process	GO:0006725	cellular aromatic compound metabolic process	7.91525e-07	1.2335	278.07	343	0.368305	0.454305	0.00709393	1.127	273.292	308	4669	0.291667	0.065967	0.00135905	1	Binomial
GO Cellular Component	GO:0043226	organelle	8.59068e-07	1.1002	559.898	616	0.741587	0.815894	0.0149968	1.05227	645.271	679	11024	0.642992	0.0615929	0.00147502	1	Binomial
GO Biological Process	GO:0060155	platelet dense granule organization	9.00144e-07	14.1792	0.493681	7	0.000653882	0.00927152	0.0757507	4.27107	0.468267	2	8	0.00189394	0.25	0.00154555	1	Binomial
GO Molecular Function	GO:0004931	extracellular ATP-gated cation channel activity	9.68322e-07	29.6957	0.168375	5	0.000223013	0.00662252	0.000354182	9.76245	0.409733	4	7	0.00378788	0.571429	0.00166261	0.608131	Binomial
GO Biological Process	GO:0046483	heterocycle metabolic process	1.14009e-06	1.23125	276.142	340	0.365751	0.450331	0.0130393	1.11547	272.531	304	4656	0.287879	0.0652921	0.00195754	1	Binomial
GO Biological Process	GO:0090304	nucleic acid metabolic process	1.15196e-06	1.26607	231.425	293	0.306523	0.38808	0.0371015	1.10627	222.368	246	3799	0.232955	0.0647539	0.00197791	1	Binomial
GO Biological Process	GO:0044238	primary metabolic process	1.19592e-06	1.13773	457.052	520	0.605367	0.688742	0.0114504	1.07457	486.705	523	8315	0.495265	0.0628984	0.00205339	1	Binomial
GO Cellular Component	GO:0005737	cytoplasm	1.3825e-06	1.11707	508.472	568	0.673473	0.752318	0.000366227	1.09679	553.433	607	9455	0.574811	0.0641988	0.00237375	0.628812	Binomial
GO Biological Process	GO:0051590	positive regulation of neurotransmitter transport	1.42117e-06	10.4704	0.76406	8	0.001012	0.010596	0.0175956	5.12528	0.585333	3	10	0.00284091	0.3	0.00244015	1	Binomial
GO Biological Process	GO:0043089	positive regulation of Cdc42 GTPase activity	1.55894e-06	13.0399	0.536815	7	0.000711013	0.00927152	0.0937166	3.79651	0.5268	2	9	0.00189394	0.222222	0.00267669	1	Binomial
GO Cellular Component	GO:0043231	intracellular membrane-bounded organelle	1.77706e-06	1.10925	526.484	584	0.69733	0.77351	0.0669587	1.04089	586.036	610	10012	0.577651	0.0609269	0.00305122	1	Binomial
GO Biological Process	GO:0060255	regulation of macromolecule metabolic process	1.93433e-06	1.20471	309.618	373	0.41009	0.49404	9.55307e-05	1.1945	271.243	324	4634	0.306818	0.069918	0.00332124	0.164026	Binomial
GO Biological Process	GO:0006807	nitrogen compound metabolic process	2.61628e-06	1.2003	312.423	375	0.413805	0.496689	0.0100099	1.11046	308.88	343	5277	0.324811	0.0649991	0.00449214	1	Binomial
MSigDB Pathway	BIOCARTA_P53HYPOXIA_PATHWAY	Hypoxia and p53 in the Cardiovascular system	2.76075e-06	6.94182	1.44054	10	0.00190801	0.013245	0.0094632	3.71397	1.34627	5	23	0.00473485	0.217391	0.00474021	1	Binomial
GO Biological Process	GO:0034641	cellular nitrogen compound metabolic process	2.92557e-06	1.2162	284.492	346	0.376811	0.458278	0.0169306	1.10686	284.589	315	4862	0.298295	0.0647882	0.00502321	1	Binomial
GO Cellular Component	GO:0043227	membrane-bounded organelle	2.99613e-06	1.10627	527.899	584	0.699204	0.77351	0.0667878	1.04077	588.026	612	10046	0.579546	0.0609198	0.00514436	1	Binomial
GO Cellular Component	GO:0044464	cell part	3.32033e-06	1.05408	672.627	709	0.890897	0.939073	0.223	1.01127	866.235	876	14799	0.829546	0.0591932	0.00570101	1	Binomial
GO Cellular Component	GO:0005623	cell	3.58641e-06	1.05384	672.779	709	0.891098	0.939073	0.224435	1.0112	866.293	876	14800	0.829546	0.0591892	0.00615787	1	Binomial
GO Biological Process	GO:0016070	RNA metabolic process	4.07303e-06	1.27688	202.838	259	0.268659	0.343046	0.0061623	1.16691	185.96	217	3177	0.205492	0.0683034	0.00699339	1	Binomial
GO Biological Process	GO:0010467	gene expression	4.33987e-06	1.26526	214.185	271	0.283689	0.35894	0.0242304	1.12534	200.828	226	3431	0.214015	0.06587	0.00745156	1	Binomial
GO Molecular Function	GO:0052689	carboxylic ester hydrolase activity	4.42071e-06	3.62576	4.96448	18	0.00657547	0.0238411	0.0802318	1.70843	5.268	9	90	0.00852273	0.1	0.00759036	1	Binomial
MSigDB Pathway	REACTOME_CYTOSOLIC_TRNA_AMINOACYLATION	Genes involved in Cytosolic tRNA aminoacylation	4.9504e-06	7.44864	1.20827	9	0.00160036	0.0119205	0.765088	0.711845	1.4048	1	24	0.00094697	0.0416667	0.00849983	1	Binomial
GO Biological Process	GO:0044260	cellular macromolecule metabolic process	5.34848e-06	1.16458	370.089	431	0.490184	0.570861	0.0467286	1.07105	361.326	387	6173	0.366477	0.0626924	0.00918334	1	Binomial
GO Biological Process	GO:0033363	secretory granule organization	5.84593e-06	8.6182	0.928268	8	0.00122949	0.010596	0.053681	3.41686	0.878	3	15	0.00284091	0.2	0.0100375	1	Binomial
GO Biological Process	GO:0002313	mature B cell differentiation involved in immune response	5.96632e-06	13.9587	0.429841	6	0.000569326	0.00794702	0.0089665	6.4066	0.468267	3	8	0.00284091	0.375	0.0102442	1	Binomial
GO Biological Process	GO:0006950	response to stress	8.1454e-06	1.28731	183.329	236	0.242819	0.312583	0.00443225	1.1824	173.376	205	2962	0.194129	0.06921	0.0139857	1	Binomial
GO Cellular Component	GO:0044446	intracellular organelle part	1.11118e-05	1.16438	357.272	416	0.473208	0.550993	0.074723	1.05888	379.647	402	6486	0.380682	0.0619796	0.019079	1	Binomial
MSigDB Pathway	KEGG_PANCREATIC_CANCER	Pancreatic cancer	1.16375e-05	3.2388	5.86637	19	0.00777002	0.0251656	0.000214129	3.12811	4.15587	13	71	0.0123106	0.183099	0.0199816	0.367659	Binomial
GO Biological Process	GO:0006952	defense response	1.165e-05	1.50656	73.0138	110	0.0967071	0.145695	0.0161893	1.24905	72.0545	90	1231	0.0852273	0.0731113	0.0200031	1	Binomial
MSigDB Pathway	KEGG_AMINOACYL_TRNA_BIOSYNTHESIS	Aminoacyl-tRNA biosynthesis	1.25822e-05	5.22858	2.10382	11	0.00278652	0.0145695	0.433488	1.25007	2.39987	3	41	0.00284091	0.0731707	0.0216036	1	Binomial
GO Molecular Function	GO:0004812	aminoacyl-tRNA ligase activity	1.3066e-05	5.207	2.11254	11	0.00279807	0.0145695	0.495017	1.13895	2.634	3	45	0.00284091	0.0666667	0.0224343	1	Binomial
GO Biological Process	GO:0080090	regulation of primary metabolic process	1.54412e-05	1.1746	329.474	387	0.43639	0.512583	9.51088e-05	1.18636	288.277	342	4925	0.323864	0.0694416	0.0265125	0.163302	Binomial
GO Biological Process	GO:0032928	regulation of superoxide anion generation	1.57045e-05	11.7448	0.510866	6	0.000676644	0.00794702	0.000133894	8.54214	0.585333	5	10	0.00473485	0.5	0.0269646	0.229896	Binomial
GO Biological Process	GO:0006955	immune response	1.65422e-05	1.52665	66.1578	101	0.0876263	0.133775	0.0227117	1.24669	64.972	81	1110	0.0767045	0.072973	0.028403	1	Binomial
GO Biological Process	GO:0002335	mature B cell differentiation	1.86349e-05	11.389	0.526822	6	0.000697778	0.00794702	0.0175956	5.12528	0.585333	3	10	0.00284091	0.3	0.0319961	1	Binomial
GO Biological Process	GO:0071375	cellular response to peptide hormone stimulus	1.8882e-05	2.07156	19.3091	40	0.025575	0.0529801	0.000535268	1.90531	15.7455	30	269	0.0284091	0.111524	0.0324204	0.919056	Binomial
GO Biological Process	GO:0060159	regulation of dopamine receptor signaling pathway	1.90092e-05	11.3483	0.528712	6	0.000700281	0.00794702	0.303683	2.84738	0.3512	1	6	0.00094697	0.166667	0.0326388	1	Binomial
GO Biological Process	GO:1901360	organic cyclic compound metabolic process	1.9153e-05	1.19383	288.985	345	0.382762	0.456954	0.0413403	1.08721	286.052	311	4887	0.294508	0.0636382	0.0328857	1	Binomial
GO Biological Process	GO:0010970	microtubule-based transport	1.93561e-05	3.38227	5.02621	17	0.00665723	0.0225166	0.032938	2.02314	4.44853	9	76	0.00852273	0.118421	0.0332344	1	Binomial
GO Biological Process	GO:0044249	cellular biosynthetic process	1.97175e-05	1.20983	262.021	317	0.347047	0.419868	0.00124509	1.17078	240.865	282	4115	0.267045	0.0685298	0.0338549	1	Binomial
GO Biological Process	GO:0043088	regulation of Cdc42 GTPase activity	1.9924e-05	7.25455	1.10276	8	0.0014606	0.010596	0.0846533	2.84738	1.0536	3	18	0.00284091	0.166667	0.0342096	1	Binomial
GO Biological Process	GO:0008088	axon cargo transport	2.23118e-05	4.49923	2.66712	12	0.00353261	0.015894	0.417661	1.28132	2.34133	3	40	0.00284091	0.075	0.0383093	1	Binomial
MSigDB Pathway	ST_INTERLEUKIN_4_PATHWAY	Interleukin 4 (IL-4) Pathway	2.32e-05	7.09919	1.12689	8	0.00149257	0.010596	0.192763	1.97126	1.52187	3	26	0.00284091	0.115385	0.0398343	1	Binomial
GO Biological Process	GO:0016050	vesicle organization	2.48962e-05	2.78148	7.90946	22	0.0104761	0.0291391	0.00451322	2.19431	6.38013	14	109	0.0132576	0.12844	0.0427468	1	Binomial
GO Cellular Component	GO:0015629	actin cytoskeleton	2.69356e-05	1.84043	28.2542	52	0.0374228	0.0688742	0.00402584	1.5803	23.4133	37	400	0.0350379	0.0925	0.0462484	1	Binomial
GO Biological Process	GO:0032922	circadian regulation of gene expression	2.71707e-05	6.94098	1.15258	8	0.00152659	0.010596	0.196056	2.44061	0.819467	2	14	0.00189394	0.142857	0.0466521	1	Binomial
GO Biological Process	GO:0009058	biosynthetic process	2.81588e-05	1.20016	270.798	325	0.358672	0.430464	0.000964521	1.17065	250.289	293	4276	0.277462	0.068522	0.0483487	1	Binomial
MSigDB Pathway	REACTOME_BMAL1_CLOCK_NPAS2_ACTIVATES_CIRCADIAN_EXPRESSION	Genes involved in BMAL1:CLOCK/NPAS2 Activates Circadian Expression	3.46022e-05	3.54699	4.22893	15	0.00560124	0.0198676	2.84072e-05	4.74563	2.1072	10	36	0.0094697	0.277778	0.0594119	0.0487752	Hypergeometric
GO Molecular Function	GO:0005515	protein binding	4.28704e-05	1.112	466.724	519	0.618178	0.687417	1.18548e-05	1.14294	468.091	535	7997	0.506629	0.0669001	0.0736086	0.0203547	Hypergeometric
GO Biological Process	GO:0031399	regulation of protein modification process	4.82894e-05	1.41474	88.3554	125	0.117027	0.165563	1.07595e-05	1.5336	65.2061	100	1114	0.094697	0.0897666	0.0829129	0.018474	Hypergeometric
GO Biological Process	GO:0048583	regulation of response to stimulus	8.09648e-05	1.233	203.569	251	0.269628	0.33245	8.8204e-07	1.35833	156.811	213	2679	0.201705	0.0795073	0.139017	0.00151446	Hypergeometric
GO Biological Process	GO:0031401	positive regulation of protein modification process	8.17447e-05	1.48952	63.1075	94	0.083586	0.124503	2.41602e-05	1.62498	45.5389	74	778	0.0700758	0.0951157	0.140356	0.0414831	Hypergeometric
GO Biological Process	GO:0009966	regulation of signal transduction	0.000174438	1.25651	163.946	206	0.217148	0.272848	2.6435e-06	1.40338	118.998	167	2033	0.158144	0.0821446	0.299511	0.00453889	Hypergeometric
GO Biological Process	GO:0001932	regulation of protein phosphorylation	0.00031929	1.40691	72.4991	102	0.0960253	0.135099	1.17336e-05	1.6121	50.8655	82	869	0.0776515	0.0943613	0.548221	0.0201466	Hypergeometric
GO Biological Process	GO:0042325	regulation of phosphorylation	0.000339586	1.3857	78.6608	109	0.104187	0.144371	6.43081e-06	1.60621	54.7872	88	936	0.0833333	0.0940171	0.583068	0.0110417	Hypergeometric
GO Biological Process	GO:0033674	positive regulation of kinase activity	0.000381876	1.57767	38.6647	61	0.0512115	0.0807947	1.52187e-06	1.98133	26.7497	53	457	0.0501894	0.115974	0.655681	0.00261305	Hypergeometric
GO Biological Process	GO:0010033	response to organic substance	0.000385925	1.25292	152.444	191	0.201913	0.25298	1.67933e-05	1.36408	120.228	164	2054	0.155303	0.0798442	0.662633	0.0288341	Hypergeometric
GO Biological Process	GO:0048518	positive regulation of biological process	0.000404903	1.16117	281.613	327	0.372997	0.433113	2.13767e-07	1.30815	217.1	284	3709	0.268939	0.0765705	0.695218	0.000367037	Hypergeometric
GO Biological Process	GO:0007169	transmembrane receptor protein tyrosine kinase signaling pathway	0.000419365	1.47048	54.4039	80	0.0720581	0.10596	2.75624e-06	1.8445	33.0713	61	565	0.0577652	0.107965	0.72005	0.00473246	Hypergeometric
GO Biological Process	GO:0051347	positive regulation of transferase activity	0.000481348	1.55644	39.8346	62	0.0527611	0.0821192	1.5158e-06	1.96706	27.4521	54	469	0.0511364	0.115139	0.826475	0.00260263	Hypergeometric
GO Biological Process	GO:0001934	positive regulation of protein phosphorylation	0.000497945	1.47903	51.385	76	0.0680595	0.100662	5.27653e-06	1.78789	35.2371	63	602	0.0596591	0.104651	0.854971	0.00905981	Hypergeometric
GO Biological Process	GO:0010604	positive regulation of macromolecule metabolic process	0.000528039	1.23149	167.278	206	0.22156	0.272848	1.3889e-06	1.42013	116.891	166	1997	0.157197	0.0831247	0.906643	0.00238474	Hypergeometric
GO Biological Process	GO:0031325	positive regulation of cellular metabolic process	0.000564161	1.2291	168.417	207	0.223068	0.274172	1.11566e-05	1.37412	119.35	164	2039	0.155303	0.0804316	0.968665	0.0191558	Hypergeometric
GO Biological Process	GO:0009893	positive regulation of metabolic process	0.000613632	1.21899	178.016	217	0.235783	0.287417	1.82211e-06	1.39658	126.022	176	2153	0.166667	0.0817464	1	0.00312856	Hypergeometric
GO Biological Process	GO:0032147	activation of protein kinase activity	0.000648781	1.75634	22.2053	39	0.029411	0.0516556	1.34912e-05	2.25908	14.1651	32	242	0.030303	0.132231	1	0.0231644	Hypergeometric
GO Biological Process	GO:0043410	positive regulation of MAPK cascade	0.000757431	1.57544	34.9108	55	0.0462395	0.0728477	1.46209e-06	2.16703	19.8428	43	339	0.0407197	0.126844	1	0.0025104	Hypergeometric
GO Biological Process	GO:0007167	enzyme linked receptor protein signaling pathway	0.000786048	1.37501	72.7267	100	0.0963268	0.13245	8.11488e-07	1.7557	44.4268	78	759	0.0738636	0.102767	1	0.00139333	Hypergeometric
GO Biological Process	GO:0043549	regulation of kinase activity	0.000821754	1.43646	55.6924	80	0.0737647	0.10596	1.53078e-05	1.68856	40.2709	68	688	0.0643939	0.0988372	1	0.0262835	Hypergeometric
GO Biological Process	GO:0042327	positive regulation of phosphorylation	0.00084024	1.4472	53.2062	77	0.0704718	0.101987	5.93445e-06	1.77211	36.1151	64	617	0.0606061	0.103728	1	0.0101894	Hypergeometric
GO Biological Process	GO:0071310	cellular response to organic substance	0.00091927	1.2777	116.616	149	0.154458	0.197351	1.78476e-05	1.437	87.6829	126	1498	0.119318	0.0841121	1	0.0306442	Hypergeometric
GO Biological Process	GO:0045860	positive regulation of protein kinase activity	0.000981198	1.54318	36.9367	57	0.0489228	0.0754967	1.62543e-06	2.0076	25.4035	51	434	0.0482954	0.117512	1	0.00279087	Hypergeometric
GO Biological Process	GO:0051338	regulation of transferase activity	0.00122729	1.41225	57.3553	81	0.0759673	0.107285	2.29741e-05	1.6603	41.5587	69	710	0.0653409	0.0971831	1	0.0394466	Hypergeometric
GO Biological Process	GO:0071495	cellular response to endogenous stimulus	0.00171531	1.35114	71.0511	96	0.0941074	0.127152	4.41841e-07	1.76059	46.0072	81	786	0.0767045	0.103053	1	0.000758641	Hypergeometric
GO Biological Process	GO:0045937	positive regulation of phosphate metabolic process	0.0023987	1.37119	60.5311	83	0.0801737	0.109934	2.32638e-05	1.66676	40.7977	68	697	0.0643939	0.097561	1	0.0399439	Hypergeometric
GO Biological Process	GO:0048522	positive regulation of cellular process	0.00311054	1.14155	257.545	294	0.341119	0.389404	6.27328e-06	1.28597	193.628	249	3308	0.235795	0.0752721	1	0.0107712	Hypergeometric
GO Biological Process	GO:0051174	regulation of phosphorus metabolic process	0.00394792	1.22754	123.825	152	0.164007	0.201324	2.04292e-05	1.44028	85.4001	123	1459	0.116477	0.0843043	1	0.0350769	Hypergeometric
GO Biological Process	GO:0019220	regulation of phosphate metabolic process	0.00431308	1.22565	123.2	151	0.163178	0.2	2.13635e-05	1.44141	84.6392	122	1446	0.11553	0.0843707	1	0.0366812	Hypergeometric
GO Biological Process	GO:0009719	response to endogenous stimulus	0.00522209	1.25713	95.4552	120	0.126431	0.15894	1.6729e-05	1.51361	66.728	101	1140	0.0956439	0.0885965	1	0.0287237	Hypergeometric
GO Biological Process	GO:0010646	regulation of cell communication	0.00778581	1.15849	186.45	216	0.246954	0.286093	1.34148e-05	1.34581	133.749	180	2285	0.170455	0.0787746	1	0.0230332	Hypergeometric
GO Biological Process	GO:0043408	regulation of MAPK cascade	0.0105009	1.34371	48.3736	65	0.0640709	0.0860927	1.31568e-05	1.84038	28.7984	53	492	0.0501894	0.107724	1	0.0225902	Hypergeometric
MSigDB Pathway	KEGG_BLADDER_CANCER	Bladder cancer	2.97307e-05	4.36634	2.7483	12	0.00364013	0.015894	0.0103058	2.84738	2.4584	7	42	0.00662879	0.166667	0.0510476	1	Not associated
GO Cellular Component	GO:0044422	organelle part	3.11871e-05	1.15258	363.532	419	0.481499	0.554967	0.0910038	1.05385	386.203	407	6598	0.385417	0.0616854	0.0535483	1	Not associated
GO Biological Process	GO:0030705	cytoskeleton-dependent intracellular transport	3.1935e-05	3.24761	5.23461	17	0.00693327	0.0225166	0.046741	1.89825	4.7412	9	81	0.00852273	0.111111	0.0548324	1	Not associated
MSigDB Pathway	REACTOME_TRNA_AMINOACYLATION	Genes involved in tRNA Aminoacylation	3.30018e-05	4.69854	2.34115	11	0.00310086	0.0145695	0.449155	1.22031	2.4584	3	42	0.00284091	0.0714286	0.056664	1	Not associated
GO Biological Process	GO:0006954	inflammatory response	3.66176e-05	1.90165	24.1895	46	0.0320391	0.0609271	0.00395482	1.59335	22.5939	36	386	0.0340909	0.0932643	0.0628724	1	Not associated
GO Biological Process	GO:0051225	spindle assembly	3.70201e-05	5.11624	1.95456	10	0.00258882	0.013245	0.112785	1.94139	2.57547	5	44	0.00473485	0.113636	0.0635636	1	Not associated
GO Biological Process	GO:0006414	translational elongation	3.76915e-05	3.5199	4.26148	15	0.00564435	0.0198676	0.654968	0.90713	6.61427	6	113	0.00568182	0.0530974	0.0647163	1	Not associated
GO Biological Process	GO:0090200	positive regulation of release of cytochrome c from mitochondria	3.87434e-05	6.59664	1.21274	8	0.00160628	0.010596	0.000246878	5.19956	1.34627	7	23	0.00662879	0.304348	0.0665225	0.423889	Not associated
MSigDB Pathway	BIOCARTA_RACCYCD_PATHWAY	Influence of Ras and Rho proteins on G1 to S Transition	3.98547e-05	5.69752	1.57963	9	0.00209223	0.0119205	0.00331854	3.94253	1.52187	6	26	0.00568182	0.230769	0.0684305	1	Not associated
MSigDB Pathway	PID_CERAMIDE_PATHWAY	Ceramide signaling pathway	4.08215e-05	3.93157	3.30657	13	0.00437956	0.0172185	0.000385384	3.55923	2.8096	10	48	0.0094697	0.208333	0.0700906	0.661704	Not associated
GO Biological Process	GO:0030853	negative regulation of granulocyte differentiation	4.33743e-05	9.77299	0.613937	6	0.000813162	0.00794702	0.0590546	4.88122	0.409733	2	7	0.00189394	0.285714	0.0744738	1	Not associated
GO Cellular Component	GO:0012505	endomembrane system	4.37122e-05	1.35616	114.293	155	0.151382	0.205298	0.00648315	1.24551	96.3459	120	1646	0.113636	0.072904	0.0750538	1	Not associated
MSigDB Pathway	PID_BETACATENIN_DEG_PATHWAY	Degradation of beta catenin	4.41114e-05	5.62201	1.60085	9	0.00212033	0.0119205	0.073623	3.01487	0.995067	3	17	0.00284091	0.176471	0.0757393	1	Not associated
GO Biological Process	GO:0030193	regulation of blood coagulation	4.61372e-05	3.29191	4.8604	16	0.00643761	0.0211921	0.00127508	2.89119	3.80467	11	65	0.0104167	0.169231	0.0792176	1	Not associated
GO Biological Process	GO:0010638	positive regulation of organelle organization	4.65927e-05	2.05217	18.0297	37	0.0238804	0.0490066	0.00666709	1.70162	14.6919	25	251	0.0236742	0.0996016	0.0799996	1	Not associated
GO Biological Process	GO:0006418	tRNA aminoacylation for protein translation	4.79235e-05	4.50507	2.44169	11	0.00323403	0.0145695	0.55302	1.04598	2.86813	3	49	0.00284091	0.0612245	0.0822846	1	Not associated
GO Biological Process	GO:0006986	response to unfolded protein	4.93285e-05	2.81236	7.11147	20	0.00941917	0.0264901	0.000397969	2.36935	8.01907	19	137	0.0179924	0.138686	0.0846971	0.683313	Not associated
GO Molecular Function	GO:0046961	proton-transporting ATPase activity, rotational mechanism	5.1746e-05	9.463	0.634048	6	0.000839799	0.00794702	0.00233025	5.02479	0.995067	5	17	0.00473485	0.294118	0.0888479	1	Not associated
GO Biological Process	GO:0015991	ATP hydrolysis coupled proton transport	5.22994e-05	6.31693	1.26644	8	0.0016774	0.010596	0.00115485	4.12379	1.69747	7	29	0.00662879	0.241379	0.0897981	1	Not associated
GO Cellular Component	GO:0031519	PcG protein complex	5.44038e-05	4.09617	2.92957	12	0.00388022	0.015894	0.00683811	3.06641	2.2828	7	39	0.00662879	0.179487	0.0934113	1	Not associated
GO Biological Process	GO:0050818	regulation of coagulation	5.44766e-05	3.10768	5.47032	17	0.00724546	0.0225166	0.000788895	2.88748	4.15587	12	71	0.0113636	0.169014	0.0935363	1	Not associated
GO Cellular Component	GO:0031082	BLOC complex	5.49024e-05	7.46363	0.937882	7	0.00124223	0.00927152	0.328571	1.70843	1.17067	2	20	0.00189394	0.1	0.0942674	1	Not associated
GO Biological Process	GO:0034645	cellular macromolecule biosynthetic process	5.49535e-05	1.22701	218.417	268	0.289294	0.354967	0.00993581	1.15134	193.687	223	3309	0.211174	0.067392	0.0943552	1	Not associated
GO Cellular Component	GO:0031083	BLOC-1 complex	5.53468e-05	9.3472	0.641903	6	0.000850203	0.00794702	0.595502	1.13895	0.878	1	15	0.00094697	0.0666667	0.0950305	1	Not associated
GO Biological Process	GO:0030195	negative regulation of blood coagulation	5.81972e-05	5.41995	1.66053	9	0.00219938	0.0119205	0.0170852	2.84738	2.1072	6	36	0.00568182	0.166667	0.0999246	1	Not associated
GO Cellular Component	GO:0031094	platelet dense tubular network	5.96675e-05	9.21932	0.650807	6	0.000861996	0.00794702	0.0231576	4.65935	0.643867	3	11	0.00284091	0.272727	0.102449	1	Not associated
GO Biological Process	GO:0048194	Golgi vesicle budding	6.02157e-05	9.20387	0.6519	6	0.000863443	0.00794702	0.0120568	4.27107	0.936534	4	16	0.00378788	0.25	0.10339	1	Not associated
GO Biological Process	GO:0035966	response to topologically incorrect protein	6.39363e-05	2.75853	7.25023	20	0.00960296	0.0264901	0.000811742	2.23863	8.48733	19	145	0.0179924	0.131034	0.109779	1	Not associated
GO Biological Process	GO:0032489	regulation of Cdc42 protein signal transduction	6.55434e-05	6.11315	1.30865	8	0.00173332	0.010596	0.134883	2.32967	1.28773	3	22	0.00284091	0.136364	0.112538	1	Not associated
GO Biological Process	GO:0048490	anterograde synaptic vesicle transport	7.08549e-05	8.93286	0.671677	6	0.000889639	0.00794702	0.619198	1.06777	0.936534	1	16	0.00094697	0.0625	0.121658	1	Not associated
GO Biological Process	GO:1901576	organic substance biosynthetic process	7.24855e-05	1.19097	267.009	318	0.353654	0.421192	0.00180043	1.16197	246.133	286	4205	0.270833	0.0680143	0.124458	1	Not associated
GO Biological Process	GO:0050872	white fat cell differentiation	7.4918e-05	5.99508	1.33443	8	0.00176745	0.010596	0.153275	2.84738	0.7024	2	12	0.00189394	0.166667	0.128634	1	Not associated
GO Biological Process	GO:0061041	regulation of wound healing	7.53478e-05	2.64647	7.93509	21	0.01051	0.0278146	0.000215089	2.84738	5.268	15	90	0.0142045	0.166667	0.129372	0.369308	Not associated
GO Biological Process	GO:0032862	activation of Rho GTPase activity	7.95361e-05	5.19928	1.73101	9	0.00229273	0.0119205	0.0367134	3.10623	1.28773	4	22	0.00378788	0.181818	0.136563	1	Not associated
GO Biological Process	GO:0048535	lymph node development	8.00097e-05	7.02189	0.996882	7	0.00132037	0.00927152	0.00728053	4.88122	0.819467	4	14	0.00378788	0.285714	0.137377	1	Not associated
GO Biological Process	GO:0030852	regulation of granulocyte differentiation	8.31721e-05	5.9041	1.35499	8	0.00179469	0.010596	0.053681	3.41686	0.878	3	15	0.00284091	0.2	0.142807	1	Not associated
GO Biological Process	GO:0065007	biological regulation	8.7193e-05	1.08524	539.974	586	0.715198	0.776159	0.000293751	1.0941	576.729	631	9853	0.597538	0.0640414	0.14971	0.50437	Not associated
GO Biological Process	GO:0007051	spindle organization	8.94133e-05	3.42627	4.08607	14	0.00541201	0.018543	0.0955473	1.70843	4.68267	8	80	0.00757576	0.1	0.153523	1	Not associated
GO Biological Process	GO:0050819	negative regulation of coagulation	9.22765e-05	4.57531	2.18564	10	0.00289489	0.013245	0.00787942	2.98975	2.34133	7	40	0.00662879	0.175	0.158439	1	Not associated
GO Biological Process	GO:0050776	regulation of immune response	9.50346e-05	1.57568	46.9638	74	0.0622037	0.0980132	0.0018093	1.46856	40.8563	60	698	0.0568182	0.0859599	0.163174	1	Not associated
GO Biological Process	GO:0009059	macromolecule biosynthetic process	0.000100848	1.21469	223.103	271	0.2955	0.35894	0.00818406	1.15455	196.613	227	3359	0.214962	0.0675796	0.173156	1	Not associated
GO Cellular Component	GO:0044429	mitochondrial part	0.000105591	1.61362	41.5215	67	0.0549954	0.0887417	0.172592	1.14183	46.4169	53	793	0.0501894	0.0668348	0.1813	1	Not associated
GO Biological Process	GO:0008286	insulin receptor signaling pathway	0.000111991	2.29553	11.3264	26	0.0150018	0.0344371	0.00276305	2.06387	8.72147	18	149	0.0170455	0.120805	0.192289	1	Not associated
MSigDB Pathway	PID_P53REGULATIONPATHWAY	p53 pathway	0.000114409	3.54174	3.67051	13	0.0048616	0.0172185	0.055754	2.02695	3.45347	7	59	0.00662879	0.118644	0.19644	1	Not associated
MSigDB Pathway	BIOCARTA_IL2_PATHWAY	IL 2 signaling pathway	0.000117105	6.59823	1.06089	7	0.00140515	0.00927152	0.00777361	3.88279	1.28773	5	22	0.00473485	0.227273	0.201069	1	Not associated
GO Biological Process	GO:0045815	positive regulation of gene expression, epigenetic	0.000124004	6.53649	1.07091	7	0.00141843	0.00927152	0.0448397	3.66092	0.819467	3	14	0.00284091	0.214286	0.212915	1	Not associated
GO Biological Process	GO:0097191	extrinsic apoptotic signaling pathway	0.000124713	3.74521	3.20409	12	0.00424383	0.015894	0.0141224	2.48499	3.21933	8	55	0.00757576	0.145454	0.214131	1	Not associated
GO Molecular Function	GO:0044769	ATPase activity, coupled to transmembrane movement of ions, rotational mechanism	0.000128463	8.00149	0.749861	6	0.000993193	0.00794702	0.00397147	4.49586	1.11213	5	19	0.00473485	0.263158	0.220571	1	Not associated
MSigDB Pathway	REACTOME_SIGNALING_BY_FGFR_IN_DISEASE	Genes involved in Signaling by FGFR in disease	0.000130012	2.36645	10.1418	24	0.0134328	0.0317881	0.00201137	2.24056	7.14107	16	122	0.0151515	0.131148	0.223231	1	Not associated
GO Cellular Component	GO:0033176	proton-transporting V-type ATPase complex	0.00013209	6.46894	1.08209	7	0.00143324	0.00927152	0.00214445	4.27107	1.4048	6	24	0.00568182	0.25	0.226798	1	Not associated
MSigDB Pathway	SA_G1_AND_S_PHASES	Cdk2, 4, and 6 bind cyclin D in G1, while cdk2/cyclin E promotes the G1/S transition.	0.000134527	10.5257	0.475027	5	0.000629175	0.00662252	0.053681	3.41686	0.878	3	15	0.00284091	0.2	0.230982	1	Not associated
GO Biological Process	GO:0032270	positive regulation of cellular protein metabolic process	0.000138898	1.44991	68.2801	99	0.0904372	0.131126	0.000191745	1.50859	51.0411	77	872	0.0729167	0.0883027	0.238489	0.329225	Not associated
GO Cellular Component	GO:0016469	proton-transporting two-sector ATPase complex	0.000139574	4.82011	1.86718	9	0.00247308	0.0119205	0.00804285	2.73348	2.92667	8	50	0.00757576	0.16	0.239649	1	Not associated
GO Molecular Function	GO:0050321	tau-protein kinase activity	0.000143039	10.3865	0.481394	5	0.000637608	0.00662252	0.515202	1.42369	0.7024	1	12	0.00094697	0.0833333	0.245598	1	Not associated
GO Biological Process	GO:0007010	cytoskeleton organization	0.000146491	1.51783	53.3657	81	0.0706831	0.107285	0.000908547	1.50032	41.3245	62	706	0.0587121	0.0878187	0.251526	1	Not associated
GO Biological Process	GO:0090199	regulation of release of cytochrome c from mitochondria	0.000148392	4.31198	2.31912	10	0.00307168	0.013245	0.000621889	4.01983	1.99013	8	34	0.00757576	0.235294	0.254789	1	Not associated
GO Biological Process	GO:0031331	positive regulation of cellular catabolic process	0.000152736	2.44905	8.98308	22	0.0118981	0.0291391	0.00905744	2.02695	6.90693	14	118	0.0132576	0.118644	0.262248	1	Not associated
GO Biological Process	GO:0050789	regulation of biological process	0.000153929	1.08693	522.572	568	0.692148	0.752318	0.00158046	1.08597	546.058	593	9329	0.561553	0.0635652	0.264297	1	Not associated
GO Cellular Component	GO:0031090	organelle membrane	0.000158061	1.26165	160.9	203	0.213113	0.268874	0.0376374	1.13497	150.665	171	2574	0.161932	0.0664336	0.271391	1	Not associated
GO Biological Process	GO:0010942	positive regulation of cell death	0.000159492	1.68321	32.6757	55	0.043279	0.0728477	6.53172e-05	1.89312	21.6573	41	370	0.0388258	0.110811	0.273848	0.11215	Not associated
GO Biological Process	GO:0031058	positive regulation of histone modification	0.000163511	3.63534	3.30093	12	0.00437209	0.015894	0.104723	1.98654	2.51693	5	43	0.00473485	0.116279	0.280749	1	Not associated
GO Biological Process	GO:0048584	positive regulation of response to stimulus	0.000166481	1.34605	103.265	139	0.136775	0.184106	0.000151401	1.41918	73.9861	105	1264	0.0994318	0.0830696	0.285849	0.259956	Not associated
MSigDB Pathway	PID_HEDGEHOG_GLIPATHWAY	Hedgehog signaling events mediated by Gli proteins	0.000167033	3.40544	3.81742	13	0.00505618	0.0172185	0.0186797	2.54447	2.75107	7	47	0.00662879	0.148936	0.286795	1	Not associated
GO Biological Process	GO:0048193	Golgi vesicle transport	0.00017056	2.27637	10.9824	25	0.0145462	0.0331126	0.103011	1.43164	10.4775	15	179	0.0142045	0.0837989	0.292852	1	Not associated
GO Biological Process	GO:0043434	response to peptide hormone stimulus	0.000172763	1.78928	25.1498	45	0.0333109	0.0596027	0.00276492	1.65489	20.5452	34	351	0.032197	0.0968661	0.296634	1	Not associated
GO Biological Process	GO:0051017	actin filament bundle assembly	0.00017413	3.88157	2.83391	11	0.00375352	0.0145695	0.00076528	3.90498	2.04867	8	35	0.00757576	0.228571	0.298981	1	Not associated
GO Biological Process	GO:0043039	tRNA aminoacylation	0.000183392	3.85791	2.85128	11	0.00377653	0.0145695	0.59382	0.985632	3.04373	3	52	0.00284091	0.0576923	0.314884	1	Not associated
GO Biological Process	GO:1901652	response to peptide	0.000184039	1.77093	25.9751	46	0.0344041	0.0609271	0.00227474	1.66097	21.072	35	360	0.0331439	0.0972222	0.315995	1	Not associated
MSigDB Pathway	BIOCARTA_G1_PATHWAY	Cell Cycle: G1/S Check Point	0.000184214	4.6412	1.93915	9	0.00256841	0.0119205	0.00491411	3.66092	1.63893	6	28	0.00568182	0.214286	0.316296	1	Not associated
GO Molecular Function	GO:0036442	hydrogen-exporting ATPase activity	0.000189461	7.44076	0.80637	6	0.00106804	0.00794702	0.00630559	4.06769	1.2292	5	21	0.00473485	0.238095	0.325304	1	Not associated
MSigDB Pathway	PID_CIRCADIANPATHWAY	Circadian rhythm pathway	0.000191279	6.08477	1.15041	7	0.00152373	0.00927152	0.0632865	3.2033	0.936534	3	16	0.00284091	0.1875	0.328426	1	Not associated
GO Biological Process	GO:0031958	corticosteroid receptor signaling pathway	0.000192271	7.42021	0.808603	6	0.001071	0.00794702	0.0231576	4.65935	0.643867	3	11	0.00284091	0.272727	0.330129	1	Not associated
GO Cellular Component	GO:0000932	cytoplasmic mRNA processing body	0.000195246	3.82946	2.87247	11	0.00380459	0.0145695	0.000402973	3.29697	3.3364	11	57	0.0104167	0.192983	0.335237	0.691904	Not associated
GO Biological Process	GO:0046486	glycerolipid metabolic process	0.000197091	1.94791	17.9679	35	0.0237986	0.0463576	0.0354864	1.46772	17.0332	25	291	0.0236742	0.0859107	0.338406	1	Not associated
GO Biological Process	GO:0032988	ribonucleoprotein complex disassembly	0.000204521	14.2675	0.280358	4	0.000371335	0.00529801	0.303683	2.84738	0.3512	1	6	0.00094697	0.166667	0.351162	1	Not associated
GO Biological Process	GO:0006401	RNA catabolic process	0.000206267	2.34169	9.82196	23	0.0130092	0.0304636	0.0726163	1.45055	12.4091	18	212	0.0170455	0.0849057	0.354161	1	Not associated
GO Biological Process	GO:0042752	regulation of circadian rhythm	0.000222686	4.52192	1.9903	9	0.00263617	0.0119205	0.320471	1.50744	1.99013	3	34	0.00284091	0.0882353	0.382352	1	Not associated
MSigDB Pathway	BIOCARTA_PAR1_PATHWAY	Thrombin signaling and protease-activated receptors	0.000248503	3.26608	3.98031	13	0.00527193	0.0172185	0.00506583	3.23216	2.16573	7	37	0.00662879	0.189189	0.42668	1	Not associated
GO Biological Process	GO:0033572	transferrin transport	0.00025083	5.81586	1.20361	7	0.00159418	0.00927152	0.00827171	3.30663	1.81453	6	31	0.00568182	0.193548	0.430676	1	Not associated
GO Biological Process	GO:0048096	chromatin-mediated maintenance of transcription	0.000251906	9.17944	0.544696	5	0.000721451	0.00662252	0.0438554	5.69476	0.3512	2	6	0.00189394	0.333333	0.432523	1	Not associated
GO Biological Process	GO:0043457	regulation of cellular respiration	0.000263298	6.99303	0.857997	6	0.00113642	0.00794702	0.0590546	4.88122	0.409733	2	7	0.00189394	0.285714	0.452082	1	Not associated
GO Biological Process	GO:0006900	membrane budding	0.000266838	3.68977	2.98122	11	0.00394863	0.0145695	0.00417597	3.03721	2.634	8	45	0.00757576	0.177778	0.458161	1	Not associated
GO Biological Process	GO:0032869	cellular response to insulin stimulus	0.000272431	2.0638	14.0517	29	0.0186116	0.0384106	0.00458511	1.85891	11.2969	21	193	0.0198864	0.108808	0.467765	1	Not associated
GO Cellular Component	GO:0001931	uropod	0.000281853	8.95557	0.558312	5	0.000739486	0.00662252	0.000675513	8.54214	0.468267	4	8	0.00378788	0.5	0.483942	1	Not associated
MSigDB Pathway	REACTOME_PLATELET_ACTIVATION_SIGNALING_AND_AGGREGATION	Genes involved in Platelet activation, signaling and aggregation	0.000282754	2.02991	14.779	30	0.0195748	0.0397351	0.000238414	2.15711	11.5896	25	198	0.0236742	0.126263	0.485488	0.409357	Not associated
GO Biological Process	GO:0006402	mRNA catabolic process	0.000283203	2.45956	8.13154	20	0.0107703	0.0264901	0.125969	1.38521	10.8287	15	185	0.0142045	0.0810811	0.48626	1	Not associated
GO Biological Process	GO:0001775	cell activation	0.000283874	1.54513	44.6564	69	0.0591475	0.0913907	8.33148e-05	1.69032	33.1299	56	566	0.0530303	0.0989399	0.487412	0.143051	Not associated
MSigDB Pathway	KEGG_GLIOMA	Glioma	0.000286576	2.91512	5.14559	15	0.00681535	0.0198676	0.00480088	2.58853	3.8632	10	66	0.0094697	0.151515	0.492051	1	Not associated
GO Biological Process	GO:1901698	response to nitrogen compound	0.000300284	1.48715	53.7942	80	0.0712506	0.10596	0.000468457	1.5462	39.4515	61	674	0.0577652	0.0905045	0.515587	0.804341	Not associated
GO Biological Process	GO:0030225	macrophage differentiation	0.000301841	6.81416	0.88052	6	0.00116625	0.00794702	0.053681	3.41686	0.878	3	15	0.00284091	0.2	0.518261	1	Not associated
GO Biological Process	GO:0090322	regulation of superoxide metabolic process	0.000306324	6.79509	0.882991	6	0.00116952	0.00794702	0.000873351	6.10153	0.819467	5	14	0.00473485	0.357143	0.525959	1	Not associated
GO Cellular Component	GO:0031967	organelle envelope	0.000322129	1.49711	51.4325	77	0.0681226	0.101987	0.0742571	1.20479	50.6313	61	865	0.0577652	0.0705202	0.553096	1	Not associated
GO Biological Process	GO:0031062	positive regulation of histone methylation	0.000324806	5.56872	1.25702	7	0.00166493	0.00927152	0.306577	1.79835	1.11213	2	19	0.00189394	0.105263	0.557692	1	Not associated
GO Biological Process	GO:0032863	activation of Rac GTPase activity	0.00034062	6.65921	0.901008	6	0.00119339	0.00794702	0.112747	3.41686	0.585333	2	10	0.00189394	0.2	0.584844	1	Not associated
GO Cellular Component	GO:0031975	envelope	0.000344067	1.49372	51.5493	77	0.0682772	0.101987	0.0606697	1.2189	50.8655	62	869	0.0587121	0.0713464	0.590764	1	Not associated
GO Biological Process	GO:0051570	regulation of histone H3-K9 methylation	0.000358519	6.59447	0.909853	6	0.0012051	0.00794702	0.38284	2.13553	0.468267	1	8	0.00094697	0.125	0.615578	1	Not associated
GO Cellular Component	GO:0000307	cyclin-dependent protein kinase holoenzyme complex	0.000359653	5.47369	1.27885	7	0.00169384	0.00927152	0.00233025	5.02479	0.995067	5	17	0.00473485	0.294118	0.617525	1	Not associated
GO Cellular Component	GO:0031095	platelet dense tubular network membrane	0.000361674	8.47606	0.589897	5	0.00078132	0.00662252	0.0937166	3.79651	0.5268	2	9	0.00189394	0.222222	0.620995	1	Not associated
GO Molecular Function	GO:0051400	BH domain binding	0.000362327	12.2551	0.326394	4	0.000432309	0.00529801	0.0089665	6.4066	0.468267	3	8	0.00284091	0.375	0.622115	1	Not associated
GO Biological Process	GO:0031061	negative regulation of histone methylation	0.000362428	5.46657	1.28051	7	0.00169604	0.00927152	0.153275	2.84738	0.7024	2	12	0.00189394	0.166667	0.622289	1	Not associated
GO Cellular Component	GO:0035098	ESC/E(Z) complex	0.000368826	5.45041	1.28431	7	0.00170107	0.00927152	0.174454	2.62835	0.760933	2	13	0.00189394	0.153846	0.633274	1	Not associated
GO Biological Process	GO:0048011	neurotrophin TRK receptor signaling pathway	0.000376939	1.74993	24.5725	43	0.0325463	0.0569536	0.000866445	1.85028	16.2137	30	277	0.0284091	0.108303	0.647204	1	Not associated
GO Molecular Function	GO:1901363	heterocyclic compound binding	0.000394937	1.14354	322.681	369	0.427393	0.488742	0.177529	1.0444	310.227	324	5300	0.306818	0.0611321	0.678106	1	Not associated
GO Cellular Component	GO:0033179	proton-transporting V-type ATPase, V0 domain	0.000396479	11.9635	0.33435	4	0.000442848	0.00529801	0.0175956	5.12528	0.585333	3	10	0.00284091	0.3	0.680754	1	Not associated
GO Biological Process	GO:0010468	regulation of gene expression	0.000406825	1.17224	259.333	304	0.343488	0.402649	0.00168872	1.17603	219.383	258	3748	0.244318	0.0688367	0.698519	1	Not associated
GO Biological Process	GO:0006658	phosphatidylserine metabolic process	0.000432875	5.30428	1.31969	7	0.00174793	0.00927152	0.0135655	3.41686	1.46333	5	25	0.00473485	0.2	0.743246	1	Not associated
GO Biological Process	GO:0006818	hydrogen transport	0.000437512	3.75458	2.66342	10	0.0035277	0.013245	0.0171782	2.26116	3.98027	9	68	0.00852273	0.132353	0.751209	1	Not associated
MSigDB Pathway	BIOCARTA_MYOSIN_PATHWAY	PKC-catalyzed phosphorylation of inhibitory phosphoprotein of myosin phosphatase	0.000446392	3.74474	2.67041	10	0.00353697	0.013245	0.104965	2.20442	1.81453	4	31	0.00378788	0.129032	0.766455	1	Not associated
GO Cellular Component	GO:0035770	ribonucleoprotein granule	0.000446518	2.91787	4.79801	14	0.00635498	0.018543	0.00122521	2.51768	5.56067	14	95	0.0132576	0.147368	0.766671	1	Not associated
MSigDB Pathway	REACTOME_SIGNALING_BY_ERBB2	Genes involved in Signaling by ERBB2	0.000466465	2.42676	7.82937	19	0.01037	0.0251656	0.00150434	2.46577	5.67773	14	97	0.0132576	0.14433	0.80092	1	Not associated
GO Biological Process	GO:0040029	regulation of gene expression, epigenetic	0.000478754	2.35774	8.4827	20	0.0112354	0.0264901	0.0504023	1.65743	7.84347	13	134	0.0123106	0.0970149	0.82202	1	Not associated
GO Biological Process	GO:0000086	G2/M transition of mitotic cell cycle	0.000487648	2.41769	7.85875	19	0.0104089	0.0251656	0.0623979	1.64009	7.31667	12	125	0.0113636	0.096	0.837292	1	Not associated
MSigDB Pathway	REACTOME_SIGNALING_BY_FGFR	Genes involved in Signaling by FGFR	0.000488438	2.29695	9.14257	21	0.0121094	0.0278146	0.00154231	2.37282	6.3216	15	108	0.0142045	0.138889	0.838648	1	Not associated
GO Molecular Function	GO:0097159	organic cyclic compound binding	0.000488669	1.13954	326.447	372	0.43238	0.492715	0.183425	1.04293	314.5	328	5373	0.310606	0.061046	0.839044	1	Not associated
GO Biological Process	GO:0032870	cellular response to hormone stimulus	0.000489842	1.58284	36.643	58	0.0485338	0.0768212	2.95026e-05	1.86302	25.2279	47	431	0.0445076	0.109049	0.841058	0.050656	Not associated
MSigDB Pathway	BIOCARTA_NTHI_PATHWAY	NFkB activation by Nontypeable Hemophilus influenzae	0.000510633	4.02704	2.23489	9	0.00296012	0.0119205	0.0094632	3.71397	1.34627	5	23	0.00473485	0.217391	0.876757	1	Not associated
GO Biological Process	GO:0008089	anterograde axon cargo transport	0.000510913	6.16127	0.973825	6	0.00128984	0.00794702	0.750463	0.742795	1.34627	1	23	0.00094697	0.0434783	0.877237	1	Not associated
GO Molecular Function	GO:0019900	kinase binding	0.000521505	1.618	32.7565	53	0.0433861	0.0701987	0.000524162	1.70437	24.6425	42	421	0.0397727	0.0997625	0.895425	0.899986	Not associated
GO Biological Process	GO:0032438	melanosome organization	0.000528194	5.12712	1.36529	7	0.00180833	0.00927152	0.284446	1.89825	1.0536	2	18	0.00189394	0.111111	0.906909	1	Not associated
GO Biological Process	GO:0048536	spleen development	0.000546516	3.17199	3.78312	12	0.00501075	0.015894	0.255477	1.70843	1.756	3	30	0.00284091	0.1	0.938367	1	Not associated
MSigDB Pathway	PID_SMAD2_3PATHWAY	Regulation of cytoplasmic and nuclear SMAD2/3 signaling	0.000551301	5.08963	1.37535	7	0.00182165	0.00927152	0.00233025	5.02479	0.995067	5	17	0.00473485	0.294118	0.946585	1	Not associated
GO Molecular Function	GO:0008320	protein transmembrane transporter activity	0.000572258	7.65326	0.653316	5	0.000865319	0.00662252	0.053681	3.41686	0.878	3	15	0.00284091	0.2	0.982567	1	Not associated
MSigDB Pathway	REACTOME_DOWNREGULATION_OF_SMAD2_3_SMAD4_TRANSCRIPTIONAL_ACTIVITY	Genes involved in Downregulation of SMAD2/3:SMAD4 transcriptional activity	0.000578179	4.40907	1.81444	8	0.00240324	0.010596	0.00397147	4.49586	1.11213	5	19	0.00473485	0.263158	0.992734	1	Not associated
GO Biological Process	GO:0051701	interaction with host	0.000619558	1.73248	23.6655	41	0.0313451	0.0543046	0.120878	1.25747	23.0621	29	394	0.0274621	0.0736041	1	1	Not associated
GO Cellular Component	GO:0016281	eukaryotic translation initiation factor 4F complex	0.000620354	10.6073	0.3771	4	0.00049947	0.00529801	0.0937166	3.79651	0.5268	2	9	0.00189394	0.222222	1	1	Not associated
GO Biological Process	GO:0050873	brown fat cell differentiation	0.000628683	3.90958	2.30204	9	0.00304906	0.0119205	0.255477	1.70843	1.756	3	30	0.00284091	0.1	1	1	Not associated
GO Biological Process	GO:0051247	positive regulation of protein metabolic process	0.000632639	1.37371	75.7076	104	0.100275	0.137748	0.000294057	1.46692	55.8993	82	955	0.0776515	0.0858639	1	0.504896	Not associated
MSigDB Pathway	PID_P53DOWNSTREAMPATHWAY	Direct p53 effectors	0.000633686	2.20083	9.99624	22	0.0132401	0.0291391	0.0582276	1.62114	8.01907	13	137	0.0123106	0.0948905	1	1	Not associated
GO Cellular Component	GO:0005865	striated muscle thin filament	0.00064985	7.43816	0.672209	5	0.000890344	0.00662252	0.073623	3.01487	0.995067	3	17	0.00284091	0.176471	1	1	Not associated
MSigDB Pathway	REACTOME_PYRUVATE_METABOLISM	Genes involved in Pyruvate metabolism	0.000651941	5.87738	1.02086	6	0.00135214	0.00794702	0.284446	1.89825	1.0536	2	18	0.00189394	0.111111	1	1	Not associated
GO Biological Process	GO:0009987	cellular process	0.000653776	1.045	653.587	683	0.865679	0.904636	0.00941956	1.04081	790.727	823	13509	0.779356	0.0609224	1	1	Not associated
GO Biological Process	GO:2000134	negative regulation of G1/S transition of mitotic cell cycle	0.000653992	2.80426	4.99241	14	0.00661246	0.018543	0.0451718	1.83702	5.4436	10	93	0.0094697	0.107527	1	1	Not associated
GO Molecular Function	GO:0001614	purinergic nucleotide receptor activity	0.000664713	7.40046	0.675633	5	0.000894878	0.00662252	0.0223383	3.59669	1.11213	4	19	0.00378788	0.210526	1	1	Not associated
GO Biological Process	GO:0035590	purinergic nucleotide receptor signaling pathway	0.000664713	7.40046	0.675633	5	0.000894878	0.00662252	0.0223383	3.59669	1.11213	4	19	0.00378788	0.210526	1	1	Not associated
GO Biological Process	GO:0009725	response to hormone stimulus	0.000669424	1.43917	56.9772	82	0.0754665	0.108609	0.000192085	1.57292	41.3245	65	706	0.061553	0.092068	1	0.32981	Not associated
GO Biological Process	GO:0030168	platelet activation	0.000672588	1.89908	16.3237	31	0.0216208	0.0410596	0.000333825	2.07566	12.5261	26	214	0.0246212	0.121495	1	0.573178	Not associated
GO Biological Process	GO:0042921	glucocorticoid receptor signaling pathway	0.000676623	7.37098	0.678336	5	0.000898458	0.00662252	0.0937166	3.79651	0.5268	2	9	0.00189394	0.222222	1	1	Not associated
GO Molecular Function	GO:0005149	interleukin-1 receptor binding	0.000687582	10.3163	0.387735	4	0.000513556	0.00529801	0.262247	2.00991	0.995067	2	17	0.00189394	0.117647	1	1	Not associated
MSigDB Pathway	REACTOME_SIGNALING_BY_EGFR_IN_CANCER	Genes involved in Signaling by EGFR in Cancer	0.000690354	2.28775	8.7422	20	0.0115791	0.0264901	0.00115392	2.44061	6.146	15	105	0.0142045	0.142857	1	1	Not associated
GO Biological Process	GO:0045916	negative regulation of complement activation	0.000708082	10.2346	0.390831	4	0.000517656	0.00529801	0.0590546	4.88122	0.409733	2	7	0.00189394	0.285714	1	1	Not associated
GO Biological Process	GO:0090080	positive regulation of MAPKKK cascade by fibroblast growth factor receptor signaling pathway	0.00071561	10.2053	0.391952	4	0.000519141	0.00529801	0.0438554	5.69476	0.3512	2	6	0.00189394	0.333333	1	1	Not associated
GO Cellular Component	GO:0030529	ribonucleoprotein complex	0.000723898	1.62014	30.8614	50	0.0408761	0.0662252	0.165114	1.16607	36.876	43	630	0.0407197	0.068254	1	1	Not associated
GO Biological Process	GO:0048537	mucosal-associated lymphoid tissue development	0.000737528	5.73796	1.04567	6	0.00138499	0.00794702	0.0295586	4.27107	0.7024	3	12	0.00284091	0.25	1	1	Not associated
GO Biological Process	GO:0032868	response to insulin stimulus	0.000753356	1.8638	17.1693	32	0.0227407	0.0423841	0.0115203	1.66499	13.8139	23	236	0.0217803	0.0974576	1	1	Not associated
MSigDB Pathway	BIOCARTA_P35ALZHEIMERS_PATHWAY	Deregulation of CDK5 in Alzheimers Disease	0.000775686	7.14756	0.699539	5	0.000926542	0.00662252	0.485042	1.55312	0.643867	1	11	0.00094697	0.0909091	1	1	Not associated
GO Cellular Component	GO:0005739	mitochondrion	0.000780847	1.33396	88.4582	118	0.117163	0.156291	0.464894	1.01256	92.8339	94	1586	0.0890152	0.0592686	1	1	Not associated
MSigDB Pathway	REACTOME_IRON_UPTAKE_AND_TRANSPORT	Genes involved in Iron uptake and transport	0.000802907	4.76982	1.46756	7	0.00194379	0.00927152	0.0569383	2.37282	2.1072	5	36	0.00473485	0.138889	1	1	Not associated
GO Molecular Function	GO:0022884	macromolecule transmembrane transporter activity	0.000845195	7.01028	0.713238	5	0.000944686	0.00662252	0.073623	3.01487	0.995067	3	17	0.00284091	0.176471	1	1	Not associated
MSigDB Pathway	REACTOME_RIP_MEDIATED_NFKB_ACTIVATION_VIA_DAI	Genes involved in RIP-mediated NFkB activation via DAI	0.000864026	6.97541	0.716804	5	0.000949409	0.00662252	0.0846533	2.84738	1.0536	3	18	0.00284091	0.166667	1	1	Not associated
GO Biological Process	GO:0001935	endothelial cell proliferation	0.00086501	4.13961	1.93255	8	0.00255967	0.010596	0.073623	3.01487	0.995067	3	17	0.00284091	0.176471	1	1	Not associated
GO Biological Process	GO:0010543	regulation of platelet activation	0.000878057	3.72608	2.41541	9	0.00319921	0.0119205	0.00331854	3.94253	1.52187	6	26	0.00568182	0.230769	1	1	Not associated
MSigDB Pathway	REACTOME_DOWNSTREAM_SIGNALING_OF_ACTIVATED_FGFR	Genes involved in Downstream signaling of activated FGFR	0.00088073	2.29823	8.26723	19	0.01095	0.0251656	0.00422787	2.28965	5.67773	13	97	0.0123106	0.134021	1	1	Not associated
GO Biological Process	GO:0070201	regulation of establishment of protein localization	0.000906532	1.60299	31.1917	50	0.0413135	0.0662252	0.0153977	1.48364	22.2427	33	380	0.03125	0.0868421	1	1	Not associated
GO Biological Process	GO:0030512	negative regulation of transforming growth factor beta receptor signaling pathway	0.000906726	2.70893	5.16809	14	0.00684515	0.018543	0.00480088	2.58853	3.8632	10	66	0.0094697	0.151515	1	1	Not associated
MSigDB Pathway	PID_P73PATHWAY	p73 transcription factor network	0.000911994	2.8347	4.58603	13	0.00607421	0.0172185	0.0903643	1.73005	4.62413	8	79	0.00757576	0.101266	1	1	Not associated
GO Biological Process	GO:0038093	Fc receptor signaling pathway	0.000920578	1.78462	19.612	35	0.0259762	0.0463576	0.000236445	2.08722	12.9359	27	221	0.0255682	0.122172	1	0.405977	Not associated
GO Biological Process	GO:0055072	iron ion homeostasis	0.00092583	2.70291	5.17961	14	0.00686041	0.018543	0.0146141	2.11154	5.20947	11	89	0.0104167	0.123595	1	1	Not associated
GO Biological Process	GO:0038179	neurotrophin signaling pathway	0.000929544	1.67132	25.7281	43	0.034077	0.0569536	0.00103053	1.83046	16.3893	30	280	0.0284091	0.107143	1	1	Not associated
MSigDB Pathway	REACTOME_BASIGIN_INTERACTIONS	Genes involved in Basigin interactions	0.000932171	4.64734	1.50624	7	0.00199502	0.00927152	0.163046	2.13553	1.4048	3	24	0.00284091	0.125	1	1	Not associated
GO Cellular Component	GO:0032991	macromolecular complex	0.000942645	1.16313	252.767	294	0.334791	0.389404	0.398174	1.01567	247.128	251	4222	0.237689	0.0594505	1	1	Not associated
GO Biological Process	GO:0051234	establishment of localization	0.000952002	1.18503	213.497	253	0.282778	0.335099	0.019407	1.13414	193.98	220	3314	0.208333	0.066385	1	1	Not associated
GO Biological Process	GO:0010243	response to organonitrogen compound	0.00096293	1.44821	51.7881	75	0.0685935	0.0993378	0.000801989	1.53839	37.0516	57	633	0.0539773	0.0900474	1	1	Not associated
GO Cellular Component	GO:0005740	mitochondrial envelope	0.000976683	1.62481	28.9265	47	0.0383133	0.0622517	0.186115	1.16345	32.6616	38	558	0.0359848	0.0681004	1	1	Not associated
GO Biological Process	GO:0006417	regulation of translation	0.000977657	1.92572	14.54	28	0.0192583	0.0370861	0.252388	1.20013	14.1651	17	242	0.0160985	0.0702479	1	1	Not associated
GO Cellular Component	GO:0031011	Ino80 complex	0.000977918	9.3748	0.426676	4	0.000565134	0.00529801	0.570332	1.22031	0.819467	1	14	0.00094697	0.0714286	1	1	Not associated
GO Biological Process	GO:0035791	platelet-derived growth factor receptor-beta signaling pathway	0.00098275	9.3622	0.42725	4	0.000565894	0.00529801	0.00349887	8.54214	0.3512	3	6	0.00284091	0.5	1	1	Not associated
GO Molecular Function	GO:0001530	lipopolysaccharide binding	0.000988386	6.76583	0.739008	5	0.000978818	0.00662252	0.0448397	3.66092	0.819467	3	14	0.00284091	0.214286	1	1	Not associated
MSigDB Pathway	REACTOME_CA_DEPENDENT_EVENTS	Genes involved in Ca-dependent events	0.00101273	3.3585	2.97752	10	0.00394374	0.013245	0.00115485	4.12379	1.69747	7	29	0.00662879	0.241379	1	1	Not associated
MSigDB Pathway	BIOCARTA_CELLCYCLE_PATHWAY	Cyclins and Cell Cycle Regulation	0.00101529	4.57838	1.52893	7	0.00202507	0.00927152	0.0094632	3.71397	1.34627	5	23	0.00473485	0.217391	1	1	Not associated
GO Biological Process	GO:0050794	regulation of cellular process	0.00101698	1.07765	510.368	550	0.675984	0.728477	0.00110259	1.09406	518.254	567	8854	0.536932	0.0640388	1	1	Not associated
GO Biological Process	GO:0002921	negative regulation of humoral immune response	0.001022	9.26263	0.431843	4	0.000571977	0.00529801	0.0937166	3.79651	0.5268	2	9	0.00189394	0.222222	1	1	Not associated
GO Biological Process	GO:0048753	pigment granule organization	0.00104552	4.55487	1.53682	7	0.00203552	0.00927152	0.306577	1.79835	1.11213	2	19	0.00189394	0.105263	1	1	Not associated
GO Biological Process	GO:0007173	epidermal growth factor receptor signaling pathway	0.0010737	1.80362	18.2965	33	0.0242338	0.0437086	5.62779e-05	2.3135	11.2384	26	192	0.0246212	0.135417	1	0.0966292	Not associated
GO Biological Process	GO:0006810	transport	0.00107473	1.18559	209.179	248	0.277058	0.328477	0.0279434	1.12534	191.053	215	3264	0.203598	0.0658701	1	1	Not associated
GO Biological Process	GO:0038127	ERBB signaling pathway	0.00108555	1.80239	18.309	33	0.0242504	0.0437086	6.14975e-05	2.30151	11.2969	26	193	0.0246212	0.134715	1	0.105591	Not associated
GO Biological Process	GO:0002682	regulation of immune system process	0.00112443	1.35234	76.1643	103	0.10088	0.136424	0.00215269	1.36225	62.3965	85	1066	0.0804924	0.0797373	1	1	Not associated
GO Biological Process	GO:0002576	platelet degranulation	0.00114852	2.53839	5.90926	15	0.00782683	0.0198676	0.0105354	2.21091	4.97533	11	85	0.0104167	0.129412	1	1	Not associated
GO Biological Process	GO:0032930	positive regulation of superoxide anion generation	0.00116297	14.9164	0.201121	3	0.000266386	0.00397351	0.00585738	7.32183	0.409733	3	7	0.00284091	0.428571	1	1	Not associated
MSigDB Pathway	REACTOME_NFKB_IS_ACTIVATED_AND_SIGNALS_SURVIVAL	Genes involved in NF-kB is activated and signals survival	0.00119418	8.87625	0.450641	4	0.000596875	0.00529801	0.0175956	5.12528	0.585333	3	10	0.00284091	0.3	1	1	Not associated
GO Biological Process	GO:0043467	regulation of generation of precursor metabolites and energy	0.00119789	2.74867	4.72956	13	0.00626432	0.0172185	0.0230079	2.2779	3.512	8	60	0.00757576	0.133333	1	1	Not associated
GO Biological Process	GO:0055076	transition metal ion homeostasis	0.00121266	2.43686	6.56583	16	0.00869646	0.0211921	0.0193353	1.89825	6.8484	13	117	0.0123106	0.111111	1	1	Not associated
GO Biological Process	GO:2001252	positive regulation of chromosome organization	0.00122305	2.88443	4.16026	12	0.00551028	0.015894	0.176755	1.67493	2.9852	5	51	0.00473485	0.0980392	1	1	Not associated
GO Biological Process	GO:0008543	fibroblast growth factor receptor signaling pathway	0.00124749	1.86937	15.5132	29	0.0205473	0.0384106	0.000233829	2.29179	9.59947	22	164	0.0208333	0.134146	1	0.401485	Not associated
GO Biological Process	GO:0031060	regulation of histone methylation	0.00126637	3.532	2.54813	9	0.00337501	0.0119205	0.124831	2.07082	1.9316	4	33	0.00378788	0.121212	1	1	Not associated
GO Biological Process	GO:0000244	spliceosomal tri-snRNP complex assembly	0.00128456	14.4047	0.208266	3	0.000275848	0.00397351	0.0438554	5.69476	0.3512	2	6	0.00189394	0.333333	1	1	Not associated
MSigDB Pathway	SIG_IL4RECEPTOR_IN_B_LYPHOCYTES	Genes related to IL4 rceptor signaling in B lymphocytes	0.00131364	3.51297	2.56194	9	0.00339329	0.0119205	0.0701148	2.531	1.5804	4	27	0.00378788	0.148148	1	1	Not associated
GO Biological Process	GO:0002768	immune response-regulating cell surface receptor signaling pathway	0.00131974	1.6634	24.6483	41	0.0326468	0.0543046	0.00117745	1.7953	17.2673	31	295	0.0293561	0.105085	1	1	Not associated
GO Cellular Component	GO:0044428	nuclear part	0.00132333	1.22207	156.292	191	0.207009	0.25298	0.159429	1.07813	144.694	156	2472	0.147727	0.0631068	1	1	Not associated
GO Cellular Component	GO:0031410	cytoplasmic vesicle	0.00132672	1.36271	70.4478	96	0.0933083	0.127152	0.0770314	1.18712	58.1236	69	993	0.0653409	0.0694864	1	1	Not associated
GO Biological Process	GO:0044403	symbiosis, encompassing mutualism through parasitism	0.00133082	1.53574	35.8133	55	0.0474349	0.0728477	0.417913	1.0408	39.3929	41	673	0.0388258	0.0609213	1	1	Not associated
GO Cellular Component	GO:0033177	proton-transporting two-sector ATPase complex, proton-transporting domain	0.00133806	6.31358	0.791944	5	0.00104893	0.00662252	0.0424503	2.97118	1.34627	4	23	0.00378788	0.173913	1	1	Not associated
MSigDB Pathway	REACTOME_DAG_AND_IP3_SIGNALING	Genes involved in DAG and IP3 signaling	0.00135217	3.22884	3.09709	10	0.00410211	0.013245	0.00175643	3.85774	1.81453	7	31	0.00662879	0.225806	1	1	Not associated
PANTHER Pathway	P00006	Apoptosis signaling pathway	0.00135866	2.49456	6.01309	15	0.00796435	0.0198676	0.0196839	1.95249	6.146	12	105	0.0113636	0.114286	1	1	Not associated
GO Biological Process	GO:0038095	Fc-epsilon receptor signaling pathway	0.0013627	1.83585	16.3412	30	0.021644	0.0397351	0.000358963	2.22399	9.89213	22	169	0.0208333	0.130178	1	0.616339	Not associated
GO Biological Process	GO:0006879	cellular iron ion homeostasis	0.00137791	3.01132	3.65289	11	0.00483826	0.0145695	0.0171782	2.26116	3.98027	9	68	0.00852273	0.132353	1	1	Not associated
GO Biological Process	GO:0010608	posttranscriptional regulation of gene expression	0.00139687	1.64665	25.5064	42	0.0337833	0.0556291	0.0957343	1.28453	23.3548	30	399	0.0284091	0.075188	1	1	Not associated
MSigDB Pathway	BIOCARTA_41BB_PATHWAY	The 4-1BB-dependent immune response	0.0014001	5.05669	1.18655	6	0.00157158	0.00794702	0.0150496	4.01983	0.995067	4	17	0.00378788	0.235294	1	1	Not associated
GO Biological Process	GO:0006892	post-Golgi vesicle-mediated transport	0.00143183	2.69316	4.82704	13	0.00639343	0.0172185	0.295433	1.33124	4.50707	6	77	0.00568182	0.0779221	1	1	Not associated
GO Biological Process	GO:0072331	signal transduction by p53 class mediator	0.00144586	2.39451	6.68194	16	0.00885026	0.0211921	0.0930711	1.56606	7.024	11	120	0.0104167	0.0916667	1	1	Not associated
GO Biological Process	GO:1901701	cellular response to oxygen-containing compound	0.00145102	1.42586	52.5998	75	0.0696686	0.0993378	0.000245824	1.5917	37.6955	60	644	0.0568182	0.0931677	1	0.42208	Not associated
GO Biological Process	GO:0033327	Leydig cell differentiation	0.00145714	5.01654	1.19604	6	0.00158416	0.00794702	0.00395447	5.69476	0.7024	4	12	0.00378788	0.333333	1	1	Not associated
MSigDB Pathway	PID_INSULIN_PATHWAY	Insulin Pathway	0.00145904	2.82358	4.24993	12	0.00562904	0.015894	0.00417597	3.03721	2.634	8	45	0.00757576	0.177778	1	1	Not associated
GO Biological Process	GO:0034199	activation of protein kinase A activity	0.00148612	4.28034	1.63538	7	0.00216607	0.00927152	0.0150496	4.01983	0.995067	4	17	0.00378788	0.235294	1	1	Not associated
[truncated: 1,401 more rows]

## Sheet: FDR<0.05_up
Ontology	ID	Description	BinomP	RegionFoldEnrich	ExpRegions	ObsRegions	GenomeFrac	SetCov	HyperP	GeneFoldEnrich	ExpGenes	ObsGenes	TotalGenes	GeneSetCov	TermCov	BinomP_bonferroni	HyperP_bonferroni	Significance_group
[truncated: 1,480 more rows]
